# Supplementary material for: Comparative Analysis of the Transcriptomes of Persisting and Abscised Fruitlets: Insights into Plant Hormone and Carbohydrate Metabolism Regulated Self-Thinning of Pecan Fruitlets during the Early Stage
Source: MDPI journal article supplement (doi:10.3390/cimb44010013), 2021-12-30
Supplement: s1 [file s1]

## Supplementary Materials

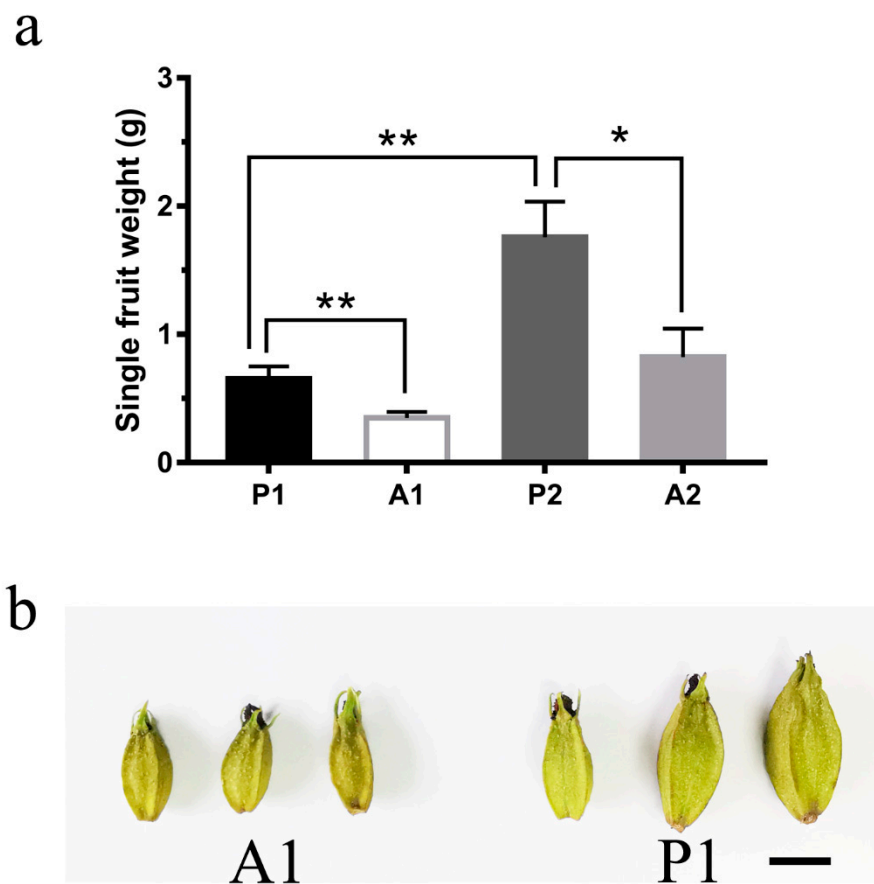

**Supplementary Figure S1.** Single fruit weight (**a**) and phenotype (**b**) of P1 and A1 in pecan. Statistically significant differences were calculated with GraphPad Prism 7.00. Data represent average  $\pm$  SD of three biological repeats with three measurements. \* Significant differences at  $p < 0.05$ ; \*\* significant differences at  $p < 0.01$ .

|       |       |       |       |       |       |      |
|-------|-------|-------|-------|-------|-------|------|
| 1.000 | 0.808 | 0.919 | 0.264 | 0.272 | 0.275 | A1-1 |
| 0.808 | 1.000 | 0.909 | 0.506 | 0.509 | 0.538 | A1-2 |
| 0.919 | 0.909 | 1.000 | 0.394 | 0.400 | 0.413 | A1-3 |
| 0.264 | 0.506 | 0.394 | 1.000 | 0.987 | 0.981 | P1-1 |
| 0.272 | 0.509 | 0.400 | 0.987 | 1.000 | 0.981 | P1-2 |
| 0.275 | 0.538 | 0.413 | 0.981 | 0.981 | 1.000 | P1-3 |
| A1-1  | A1-2  | A1-3  | P1-1  | P1-2  | P1-3  |      |

**Supplementary Figure S2.** The correlation coefficient in the repeat group of A1 and P1.
