# Supplementary material for: Comparative Analysis of the Transcriptomes of Persisting and Abscised Fruitlets: Insights into Plant Hormone and Carbohydrate Metabolism Regulated Self-Thinning of Pecan Fruitlets during the Early Stage
Source: Curr Issues Mol Biol. 2021 Dec 30;44(1):176–93. doi: 10.3390/cimb44010013 (PMC8929008; doi:10.3390/cimb44010013)
Supplement: Supplementary file 1 [file cimb-44-00013-s001.zip › Table S1-9.xlsx]

## Sheet: Table S1
Table S1 Information statistics of data after filtering and mapped to the pecan genome.
Sample	Clean reads	Clean bases	GC(%)	N(%)	Q20(%)	Q30(%)	Not aligned	Aligned	Unique aligned	Multiple aligned
A1-1	37223078	5597082580	0.4534	0	0.9757	0.9348	2206912 (5.93%)	35016166 (94.07%)	34141510 (91.72%)	874656 (2.35%)
A1-2	37187714	5602719723	0.4546	0	0.9753	0.9338	2093979 (5.63%)	35093735 (94.37%)	34091231 (91.67%)	1002504 (2.70%)
A1-3	38023410	5719776921	0.4528	0	0.9741	0.9305	2165684 (5.70%)	35854726 (94.30%)	34931638 (91.88%)	923088 (2.43%)
P1-1	45007352	6781716854	0.455	0	0.9767	0.9372	2705427 (6.01%)	42301925 (93.99%)	41179411 (91.49%)	1122514 (2.49%)
P1-2	44817744	6751848097	0.455	0	0.9752	0.9334	2713897 (6.06%)	42103847 (93.94%)	41010921 (91.51%)	1092926 (2.44%)
P1-3	46079556	6937378192	0.4535	0	0.9755	0.9345	2763818 (6.00%)	43315738 (94.00%)	42158995 (91.49%)	1156743 (2.51%)

## Sheet: Table S2
Table S2 Information statistics of genes and mapped to the pecan genome.
Samples	Reference genes	Sequenced reference genes (%)	Sequenced total novel genes	Sequenced novel genes (%)	Total genes	Sequenced total genes (%)
A1-1	31072	22128 (71.22%)	2087	1727 (82.75%)	33159	23855 (71.94%)
A1-2	31072	21603 (69.53%)	2087	1693 (81.12%)	33159	23296 (70.26%)
A1-3	31072	21438 (68.99%)	2087	1684 (80.69%)	33159	23122 (69.73%)
P1-1	31072	24344 (78.35%)	2087	1877 (89.94%)	33159	26221 (79.08%)
P1-2	31072	24222 (77.95%)	2087	1858 (89.03%)	33159	26080 (78.65%)
P1-3	31072	24354 (78.38%)	2087	1887 (90.42%)	33159	26241 (79.14%)
Total	31072	26537 (85.40%)	2087	2087 (100.00%)	33159	28624 (86.32%)

## Sheet: table S3
Tablae S3 List of differentially Expressed genes (DEGs) in abscissied fruits compairing with persisting fruitlets
ID	P1-1count	P1-2_count	P1-3_count	A1-1_count	A1-2_count	A1-3_count	P1-1_fpkm	P1-2_fpkm	P1-3_fpkm	A1-1_fpkm	A1-2_fpkm	A1-3_fpkm	P1 mean	A1 mean	log2(A1/P1)	P-Value	FDR	Regulated
MSTRG.19174	0	0	0	4741	1290	3278	0	0	0	371.38	102.5	256.23	0.001	243.37	17.8928	8.35119e-32	2.08836e-30	up
CIL0389S0003	0	0	0	3058	248	970	0	0	0	297.46	24.47	94.16	0.001	138.697	17.0816	2.8589e-14	2.17961e-13	up
CIL1575S0025	0	0	0	1174	802	569	0	0	0	115.01	79.69	55.62	0.001	83.44	16.3485	2.38534e-26	4.50319e-25	up
CIL1167S0070	0	0	0	644	317	1161	0	0	0	70.48	35.19	126.79	0.001	77.4867	16.2417	1.96687e-23	3.05225e-22	up
CIL1101S0008	0	0	0	685	384	831	0	0	0	75.46	42.91	91.35	0.001	69.9067	16.0931	4.68022e-25	8.10076e-24	up
CIL1166S0013	0	0	0	1381	1010	354	0	0	0	69.05	51.23	17.66	0.001	45.98	15.4887	7.34394e-24	1.17426e-22	up
MSTRG.5509	0	0	0	599	124	487	0	0	0	68.04	14.29	55.2	0.001	45.8433	15.4844	9.44567e-20	1.12959e-18	up
CIL0990S0054	0	0	0	1023	60	156	0	0	0	103.8	6.15	15.78	0.001	41.91	15.355	5.22289e-09	2.33155e-08	up
CIL0940S0018	0	0	0	678	204	770	0	0	0	50.03	15.27	56.7	0.001	40.6667	15.3116	4.92767e-22	6.99112e-21	up
CIL0970S0042	0	0	0	430	177	271	0	0	0	58.15	24.28	36.5	0.001	39.6433	15.2748	9.58264e-21	1.22729e-19	up
MSTRG.11663	0	0	0	503	40	153	0	0	0	76.8	6.14	23.28	0.001	35.4067	15.1117	2.27018e-14	1.74261e-13	up
CIL0912S0082	0	1	0	9564	7320	6076	0	0.08	0	963.88	748.33	611.02	0.0266667	774.41	14.8258	9.18713e-37	3.04355e-35	up
CIL1075S0079	0	0	0	361	111	389	0	0	0	33.64	10.49	36.17	0.001	26.7667	14.7081	3.72821e-19	4.26291e-18	up
MSTRG.3245	0	0	0	306	87	214	0	0	0	37.46	10.76	26.21	0.001	24.81	14.5986	7.59087e-18	7.87369e-17	up
CIL1005S0001	0	0	0	176	162	120	0	0	0	27.78	26.01	18.95	0.001	24.2467	14.5655	3.48701e-18	3.7309e-17	up
CIL1490S0023	0	0	0	176	162	120	0	0	0	27.78	26.01	18.95	0.001	24.2467	14.5655	3.48701e-18	3.7309e-17	up
CIL1323S0045	0	0	0	507	134	75	0	0	0	49.67	13.32	7.33	0.001	23.44	14.5167	1.18315e-15	1.02876e-14	up
MSTRG.15184	0	0	0	1021	112	461	0	0	0	41.46	4.63	18.68	0.001	21.59	14.3981	7.45955e-19	8.35541e-18	up
MSTRG.11016	0	0	0	377	100	277	0	0	0	30.53	8.73	23.2	0.001	20.82	14.3457	1.40263e-18	1.54361e-17	up
CIL1552S0002	0	0	0	504	27	56	0	0	0	50.43	2.74	5.59	0.001	19.5867	14.2576	3.9901e-07	1.41097e-06	up
CIL0886S0001	0	0	0	310	3	14	0	0	0	55.56	0.55	2.5	0.001	19.5367	14.2539	0.000262837	0.000621043	up
CIL1367S0001	0	0	0	99	110	108	0	0	0	17.3	19.54	18.88	0.001	18.5733	14.1809	1.01097e-16	9.53586e-16	up
CIL0002S0011	0	0	0	220	113	96	0	0	0	26.87	14.08	11.66	0.001	17.5367	14.0981	5.09642e-17	4.92781e-16	up
CIL1532S0001	0	0	0	84	104	103	0	0	0	14.78	18.47	17.99	0.001	17.08	14.06	3.82553e-16	3.45314e-15	up
CIL0940S0195	0	0	0	430	50	196	0	0	0	32.44	3.83	14.76	0.001	17.01	14.0541	1.57703e-15	1.3616e-14	up
CIL1459S0011	0	0	0	113	92	68	0	0	0	20.83	17.2	12.51	0.001	16.8467	14.0402	1.16273e-15	1.01271e-14	up
CIL0041S0007	0	0	0	458	93	103	0	0	0	33.77	6.96	7.58	0.001	16.1033	13.9751	8.0993e-16	7.16062e-15	up
CIL0489S0015	0	0	0	400	37	38	0	0	0	40.17	3.77	3.81	0.001	15.9167	13.9583	2.15302e-07	7.88352e-07	up
CIL1370S0017	0	0	0	254	25	158	0	0	0	27.44	2.74	17.03	0.001	15.7367	13.9418	1.87358e-13	1.3298e-12	up
CIL1221S0036	0	0	0	136	254	125	0	0	0	12.1	22.92	11.09	0.001	15.37	13.9078	3.07741e-17	3.03241e-16	up
MSTRG.14530	0	0	0	409	274	171	0	0	0	21.97	14.93	9.16	0.001	15.3533	13.9063	3.7285e-20	4.56675e-19	up
CIL1237S0028	0	0	0	76	46	76	0	0	0	17.45	10.72	17.42	0.001	15.1967	13.8915	1.73502e-14	1.34826e-13	up
CIL1143S0015	0	0	0	370	23	232	0	0	0	26.05	1.64	16.3	0.001	14.6633	13.8399	1.14571e-13	8.26137e-13	up
CIL0053S0008	0	1	0	5236	3749	2894	0	0.11	0	697.46	506.55	384.67	0.0366667	529.56	13.818	5.05326e-32	1.27727e-30	up
CIL0644S0006	0	0	0	270	18	57	0	0	0	33.77	2.28	7.11	0.001	14.3867	13.8124	2.84545e-11	1.62785e-10	up
MSTRG.480	0	0	0	207	66	336	0	0	0	13.52	4.37	21.9	0.001	13.2633	13.6952	1.4098e-16	1.31535e-15	up
MSTRG.24872	0	0	0	249	341	160	0	0	0	12.83	17.83	8.23	0.001	12.9633	13.6621	2.9371e-19	3.38988e-18	up
CIL1112S0017	0	0	0	51	51	11	0	0	0	17.01	17.25	3.66	0.001	12.64	13.6257	1.31998e-09	6.3013e-09	up
MSTRG.23311	1	0	0	8974	393	941	0.05	0	0	526.36	23.38	55.08	0.0166667	201.607	13.5623	4.12405e-13	2.83057e-12	up
CIL1520S0031	0	0	0	42	76	29	0	0	0	10.23	18.78	7.05	0.001	12.02	13.5531	1.36458e-11	8.04379e-11	up
CIL1131S0075	0	0	0	108	61	96	0	0	0	14.21	8.14	12.6	0.001	11.65	13.508	8.43353e-16	7.43828e-15	up
CIL0953S0065	0	0	0	211	25	103	0	0	0	20.96	2.52	10.21	0.001	11.23	13.4551	5.91458e-13	3.99889e-12	up
CIL0392S0012	3	6	0	36459	4062	28802	0.12	0.25	0	1827.34	206.5	1440.47	0.123333	1158.1	13.1969	2.29121e-51	1.53582e-49	up
MSTRG.28981	0	0	0	40	66	45	0	0	0	7.31	12.23	8.2	0.001	9.24667	13.1747	1.30762e-12	8.50236e-12	up
CIL0114S0009	0	0	0	150	32	96	0	0	0	13.01	2.84	8.33	0.001	8.06	12.9766	1.10625e-13	7.98346e-13	up
CIL1060S0016	0	0	0	171	55	80	0	0	0	11.95	3.9	5.58	0.001	7.14333	12.8024	6.4471e-15	5.25688e-14	up
CIL1141S0064	0	0	0	172	7	59	0	0	0	15.04	0.62	5.15	0.001	6.93667	12.76	1.17598e-09	5.64415e-09	up
CIL1069S0001	11	31	10	127790	73080	82229	0.71	2.01	0.63	9936.13	5763.77	6379.98	1.11667	7359.96	12.6863	2.91629e-188	6.27173e-185	up
MSTRG.14149	2	0	0	3919	1087	3756	0.08	0	0	224.4	63.13	214.57	0.0266667	167.367	12.6157	4.24416e-30	9.83205e-29	up
MSTRG.21754	0	0	0	30	78	58	0	0	0	3.37	8.86	6.52	0.001	6.25	12.6096	3.53406e-12	2.20192e-11	up
MSTRG.28609	0	0	0	89	48	96	0	0	0	6.92	3.79	7.45	0.001	6.05333	12.5635	6.70204e-15	5.4527e-14	up
CIL0094S0007	0	0	0	67	23	14	0	0	0	11.45	3.99	2.39	0.001	5.94333	12.5371	1.92312e-09	9.00724e-09	up
CIL1149S0044	1	0	0	2709	736	1135	0.05	0	0	172.5	47.54	72.12	0.0166667	97.3867	12.5125	5.62155e-24	9.06722e-23	up
MSTRG.25981	0	0	0	64	58	46	0	0	0	6.54	6.01	4.69	0.001	5.74667	12.4885	1.07431e-13	7.77255e-13	up
CIL0990S0018	2	1	2	10434	6436	6612	0.2	0.1	0.19	1243.96	778.33	786.62	0.163333	936.303	12.4849	2.56027e-79	4.68602e-77	up
CIL1276S0037	0	0	0	223	43	7	0	0	0	13.1	2.56	0.41	0.001	5.35667	12.3871	9.75577e-06	2.8485e-05	up
MSTRG.1349	0	0	0	36	21	24	0	0	0	7.19	4.15	4.72	0.001	5.35333	12.3862	1.60949e-10	8.46984e-10	up
CIL1148S0030	0	0	0	79	11	107	0	0	0	6.4	0.9	8.65	0.001	5.31667	12.3763	1.22944e-10	6.54727e-10	up
CIL0919S0177	0	0	0	120	8	123	0	0	0	7.31	0.49	7.48	0.001	5.09333	12.3144	1.95591e-10	1.02013e-09	up
MSTRG.2733	0	0	0	185	65	75	0	0	0	8.67	3.09	3.51	0.001	5.09	12.3134	3.99654e-15	3.31635e-14	up
CIL0041S0015	0	0	0	131	7	14	0	0	0	13.16	0.71	1.4	0.001	5.09	12.3134	7.89098e-08	3.05597e-07	up
MSTRG.16565	0	0	0	79	338	68	0	0	0	2.39	10.36	2.05	0.001	4.93333	12.2683	7.71204e-14	5.66617e-13	up
CIL0104S0001	1	1	0	2555	1018	4554	0.09	0.09	0	277.46	112.14	493.48	0.06	294.36	12.2603	5.68246e-29	1.23337e-27	up
CIL1587S0021	0	0	0	45	30	61	0	0	0	4.67	3.16	6.32	0.001	4.71667	12.2036	1.67793e-12	1.07771e-11	up
CIL0945S0122	0	0	0	126	11	96	0	0	0	7.58	0.67	5.76	0.001	4.67	12.1892	6.66645e-11	3.65578e-10	up
MSTRG.4222	2	0	0	2989	3850	2496	0.12	0	0	176.42	231	147.32	0.04	184.913	12.1746	4.95929e-34	1.40027e-32	up
CIL0041S0013	0	0	0	130	9	10	0	0	0	11.75	0.83	0.9	0.001	4.49333	12.1336	9.91766e-08	3.78617e-07	up
CIL1057S0030	0	0	0	86	42	32	0	0	0	7.16	3.54	2.65	0.001	4.45	12.1196	2.2413e-12	1.42186e-11	up
MSTRG.3246	0	0	0	36	17	7	0	0	0	7.92	3.86	1.44	0.001	4.40667	12.1055	1.19403e-07	4.50897e-07	up
CIL1114S0036	0	0	0	85	7	37	0	0	0	8.6	0.72	3.73	0.001	4.35	12.0868	6.41712e-09	2.8304e-08	up
CIL1496S0001	0	0	0	28	15	26	0	0	0	5.18	2.82	4.8	0.001	4.26667	12.0589	8.17245e-10	3.9952e-09	up
MSTRG.1536	0	0	0	23	11	20	0	0	0	5.42	2.63	4.7	0.001	4.25	12.0532	1.00646e-08	4.34144e-08	up
MSTRG.27735	0	0	0	219	33	29	0	0	0	9.78	1.49	1.29	0.001	4.18667	12.0316	3.3768e-11	1.91359e-10	up
CIL0919S0137	1	0	0	1772	400	1454	0.04	0	0	79.6	18.23	65.18	0.0133333	54.3367	11.9927	2.56363e-22	3.67963e-21	up
CIL0493S0002	0	0	0	88	20	44	0	0	0	6.72	1.55	3.35	0.001	3.87333	11.9194	2.12342e-11	1.22841e-10	up
CIL1358S0026	0	0	0	57	10	3	0	0	0	9.23	1.64	0.48	0.001	3.78333	11.8854	3.63574e-06	1.12746e-05	up
CIL1354S0048	0	0	1	1643	777	689	0	0	0.08	157.64	75.62	65.97	0.0266667	99.7433	11.869	2.4453e-23	3.76527e-22	up
MSTRG.3262	0	0	0	114	94	176	0	0	0	3.15	2.92	4.93	0.001	3.66667	11.8403	3.97542e-17	3.87686e-16	up
MSTRG.16075	0	0	0	35	8	20	0	0	0	6	1.47	3.47	0.001	3.64667	11.8324	2.94755e-08	1.2036e-07	up
CIL1603S0015	0	0	0	33	4	12	0	0	0	7.11	0.87	2.58	0.001	3.52	11.7814	1.90867e-06	6.17719e-06	up
MSTRG.4934	0	2	0	3248	377	1576	0	0.07	0	143.01	16.84	69.24	0.0233333	76.3633	11.6763	1.01846e-22	1.50622e-21	up
MSTRG.24289	1	0	0	1072	457	788	0.03	0	0	45.21	19.55	33.16	0.01	32.64	11.6724	1.43986e-22	2.10649e-21	up
CIL0302S0005	0	0	0	12	13	6	0	0	0	3.57	3.9	1.82	0.001	3.09667	11.5965	2.19874e-06	7.04619e-06	up
CIL1142S0004	0	0	0	35	7	14	0	0	0	5.58	1.07	2.27	0.001	2.97333	11.5379	1.67028e-07	6.1879e-07	up
MSTRG.9829	0	0	0	6	10	16	0	0	0	1.65	2.79	4.39	0.001	2.94333	11.5232	2.30753e-06	7.37377e-06	up
CIL0979S0134	1	0	1	3558	246	1235	0.02	0	0.02	80.65	5.66	27.93	0.0133333	38.08	11.4798	9.55846e-21	1.2248e-19	up
CIL0008S0007	0	0	0	31	2	22	0	0	0	4.7	0.31	3.33	0.001	2.78	11.4409	3.3829e-06	1.05476e-05	up
CIL0922S0003	0	0	0	29	31	12	0	0	0	3.23	3.51	1.33	0.001	2.69	11.3934	4.31838e-09	1.94222e-08	up
MSTRG.3608	0	0	0	3	20	12	0	0	0	0.64	4.33	2.55	0.001	2.50667	11.2916	1.20967e-05	3.4857e-05	up
CIL0935S0031	0	0	0	38	10	30	0	0	0	3.49	0.93	2.75	0.001	2.39	11.2228	3.12971e-09	1.43105e-08	up
CIL1056S0018	0	0	0	89	8	6	0	0	0	6.17	0.56	0.42	0.001	2.38333	11.2188	7.10464e-07	2.43363e-06	up
CIL0681S0001	0	0	0	59	26	21	0	0	0	3.84	1.71	1.36	0.001	2.30333	11.1695	1.3541e-10	7.18153e-10	up
CIL1429S0030	20	27	30	56012	35818	49164	1.67	2.27	2.46	5638.21	3657.21	4938.32	2.13333	4744.58	11.119	0	0	up
CIL1172S0066	0	0	0	34	0	1	0	0	0	6.44	0	0.19	0.001	2.21	11.1098	0.00616082	0.0114202	up
CIL1145S0089	0	0	0	9	15	4	0	0	0	2.1	3.55	0.93	0.001	2.19333	11.0989	1.48533e-05	4.22622e-05	up
CIL1348S0015	0	0	0	61	14	43	0	0	0	3.38	0.79	2.38	0.001	2.18333	11.0923	1.59016e-10	8.37667e-10	up
CIL1229S0008	0	0	0	118	6	56	0	0	0	4.23	0.22	2.01	0.001	2.15333	11.0724	3.07383e-09	1.40675e-08	up
CIL1114S0009	0	1	0	839	308	495	0	0.04	0	41.85	15.58	24.62	0.0133333	27.35	11.0023	2.60604e-20	3.22716e-19	up
CIL1179S0022	2	10	1	10513	753	10428	0.05	0.24	0.02	305.22	22.18	302.12	0.103333	209.84	10.9878	9.17551e-32	2.28785e-30	up
CIL1078S0058	0	0	0	34	22	43	0	0	0	2.08	1.37	2.63	0.001	2.02667	10.9849	3.06814e-11	1.74944e-10	up
MSTRG.20489	0	0	0	15	8	32	0	0	0	1.63	0.88	3.47	0.001	1.99333	10.961	9.47208e-08	3.62787e-07	up
MSTRG.16248	0	0	0	11	1	10	0	0	0	2.96	0.27	2.69	0.001	1.97333	10.9464	0.000342608	0.000795544	up
CIL1184S0049	0	0	0	51	31	8	0	0	0	3.27	2.02	0.51	0.001	1.93333	10.9169	1.22428e-08	5.22663e-08	up
CIL1066S0086	0	0	0	32	19	13	0	0	0	2.86	1.76	1.16	0.001	1.92667	10.9119	5.3168e-09	2.37142e-08	up
CIL0922S0258	0	0	0	29	2	55	0	0	0	1.84	0.13	3.46	0.001	1.81	10.8218	8.68177e-07	2.93683e-06	up
MSTRG.24837	0	0	0	38	41	3	0	0	0	2.49	2.72	0.2	0.001	1.80333	10.8165	3.70563e-07	1.31542e-06	up
MSTRG.14470	0	0	0	38	2	23	0	0	0	3.26	0.17	1.97	0.001	1.8	10.8138	2.29172e-06	7.32776e-06	up
MSTRG.12069	0	0	0	15	40	32	0	0	0	0.92	2.49	1.96	0.001	1.79	10.8057	1.10069e-09	5.30151e-09	up
CIL1344S0010	0	0	0	27	4	27	0	0	0	2.44	0.37	2.44	0.001	1.75	10.7731	3.59261e-07	1.27723e-06	up
CIL1023S0052	0	1	0	544	503	361	0	0.1	0	66.95	62.79	44.33	0.0333333	58.0233	10.7655	1.82215e-20	2.2783e-19	up
CIL0053S0004	0	0	0	42	20	38	0	0	0	2.18	1.05	1.96	0.001	1.73	10.7566	3.35507e-11	1.90295e-10	up
MSTRG.6474	0	0	0	26	7	17	0	0	0	2.66	0.73	1.73	0.001	1.70667	10.737	1.03074e-07	3.92567e-07	up
CIL1207S0062	0	0	0	39	31	38	0	0	0	1.83	1.48	1.78	0.001	1.69667	10.7285	5.2696e-12	3.22716e-11	up
MSTRG.25771	0	0	0	20	1	3	0	0	0	4.22	0.21	0.63	0.001	1.68667	10.72	0.000955665	0.00205438	up
CIL0155S0005	55	80	78	121346	65256	108680	2.46	3.6	3.44	6554.84	3575.57	5858.13	3.16667	5329.51	10.7168	0	0	up
CIL0925S0031	0	0	0	28	3	1	0	0	0	4.24	0.46	0.15	0.001	1.61667	10.6588	0.000510798	0.00115108	up
MSTRG.10808	0	0	0	17	6	0	0	0	0	3.47	1.36	0	0.001	1.61	10.6528	0.00463244	0.00879557	up
CIL0912S0121	0	0	0	44	7	18	0	0	0	3.01	0.5	1.25	0.001	1.58667	10.6318	6.92622e-08	2.7013e-07	up
CIL0970S0034	0	0	0	8	2	3	0	0	0	2.91	0.74	1.09	0.001	1.58	10.6257	0.00163557	0.00337877	up
CIL1608S0012	0	0	2	1921	140	643	0	0	0.08	89.61	6.62	29.92	0.0266667	42.05	10.6229	1.78595e-17	1.79548e-16	up
MSTRG.11311	0	0	0	13	4	22	0	0	0	1.46	0.46	2.47	0.001	1.46333	10.515	2.40292e-06	7.65487e-06	up
CIL1193S0031	4	5	13	14179	7196	4939	0.34	0.43	1.1	1465.88	754.64	509.52	0.623333	910.013	10.5117	9.76223e-87	2.13503e-84	up
CIL0957S0123	0	0	0	22	5	16	0	0	0	2.18	0.5	1.58	0.001	1.42	10.4717	5.78974e-07	2.00828e-06	up
CIL1541S0012	0	0	0	12	20	19	0	0	0	0.99	1.68	1.56	0.001	1.41	10.4615	2.22005e-08	9.18299e-08	up
CIL1060S0106	3	0	1	2329	696	1740	0.14	0	0.05	129.9	39.38	96.84	0.0633333	88.7067	10.4519	1.07266e-38	3.93772e-37	up
CIL1363S0010	0	0	1	431	261	382	0	0	0.05	27.95	17.17	24.72	0.0166667	23.28	10.4479	1.30363e-19	1.54325e-18	up
MSTRG.13454	0	0	0	17	5	15	0	0	0	1.9	0.57	1.68	0.001	1.38333	10.4339	9.88479e-07	3.31467e-06	up
CIL0073S0017	0	0	0	5	1	14	0	0	0	1.02	0.21	2.84	0.001	1.35667	10.4059	0.000800462	0.00174463	up
CIL1229S0015	0	0	0	60	3	9	0	0	0	3.24	0.16	0.48	0.001	1.29333	10.3369	4.16165e-06	1.28024e-05	up
CIL1268S0040	0	0	0	18	6	11	0	0	0	1.98	0.67	1.2	0.001	1.28333	10.3257	1.0155e-06	3.39998e-06	up
CIL1050S0060	0	0	0	18	1	2	0	0	0	3.21	0.18	0.36	0.001	1.25	10.2877	0.00190805	0.00389627	up
CIL1053S0021	0	0	0	4	11	4	0	0	0	0.78	2.17	0.78	0.001	1.24333	10.28	0.00016022	0.000391627	up
MSTRG.3844	0	0	0	7	1	9	0	0	0	1.51	0.22	1.94	0.001	1.22333	10.2566	0.000911417	0.00196746	up
MSTRG.3759	0	0	0	11	0	7	0	0	0	2.24	0	1.43	0.001	1.22333	10.2566	0.00816395	0.0147778	up
CIL0895S0227	5	2	3	5944	980	3002	0.16	0.07	0.1	232.48	38.88	117.16	0.11	129.507	10.2013	6.37256e-49	3.76331e-47	up
CIL0037S0007	0	0	0	4	6	10	0	0	0	0.7	1.07	1.75	0.001	1.17333	10.1964	6.07178e-05	0.000158293	up
CIL0912S0122	0	0	0	37	5	10	0	0	0	2.51	0.33	0.65	0.001	1.16333	10.184	1.5036e-06	4.92743e-06	up
CIL1294S0056	0	0	0	15	1	7	0	0	0	2.19	0.15	1.02	0.001	1.12	10.1293	0.000393336	0.000903982	up
CIL1142S0019	0	0	0	30	4	14	0	0	0	2.07	0.28	0.96	0.001	1.10333	10.1077	1.35187e-06	4.4568e-06	up
CIL0951S0160	0	0	0	28	7	38	0	0	0	1.25	0.32	1.7	0.001	1.09	10.0901	2.30108e-08	9.50391e-08	up
CIL1405S0047	0	0	0	15	6	6	0	0	0	1.79	0.73	0.72	0.001	1.08	10.0768	8.80743e-06	2.58847e-05	up
CIL1197S0050	0	0	0	9	14	0	0	0	0	1.24	1.96	0	0.001	1.06667	10.0589	0.00345044	0.00672244	up
CIL1204S0084	0	0	0	9	35	6	0	0	0	0.57	2.24	0.38	0.001	1.06333	10.0544	2.14532e-06	6.88868e-06	up
CIL0046S0013	0	0	0	72	3	5	0	0	0	2.78	0.12	0.19	0.001	1.03	10.0084	9.45221e-06	2.76537e-05	up
MSTRG.1559	0	0	0	19	25	32	0	0	0	0.76	1.01	1.27	0.001	1.01333	9.98489	4.57378e-10	2.29596e-09	up
CIL1172S0027	0	0	0	12	35	32	0	0	0	0.46	1.35	1.22	0.001	1.01	9.98014	3.77759e-09	1.71032e-08	up
CIL1156S0051	0	0	0	14	15	5	0	0	0	1.24	1.35	0.44	0.001	1.01	9.98014	2.40282e-06	7.65487e-06	up
CIL1449S0007	1	6	5	4554	2713	2708	0.09	0.53	0.43	479.07	289.48	284.27	0.35	350.94	9.96965	3.05246e-95	8.52301e-93	up
MSTRG.26661	0	0	0	31	2	2	0	0	0	2.66	0.17	0.17	0.001	1	9.96578	0.000313468	0.000732031	up
MSTRG.16851	0	0	0	8	16	3	0	0	0	0.87	1.76	0.33	0.001	0.986667	9.94642	3.89331e-05	0.000104509	up
MSTRG.22869	5	6	5	9917	846	1477	0.18	0.22	0.18	426.36	36.89	63.37	0.193333	175.54	9.82649	2.10828e-33	5.78813e-32	up
CIL0982S0012	0	0	0	4	4	4	0	0	0	0.9	0.92	0.9	0.001	0.906667	9.82443	0.000890436	0.00192539	up
CIL1077S0046	0	0	0	22	7	0	0	0	0	2.05	0.66	0	0.001	0.903333	9.81911	0.00246826	0.00494016	up
CIL1273S0020	0	0	0	6	1	6	0	0	0	1.22	0.21	1.22	0.001	0.883333	9.78681	0.00235908	0.00474001	up
CIL1405S0083	1	0	0	112	452	120	0.06	0	0	8.57	35.1	9.17	0.02	17.6133	9.78245	1.17106e-13	8.43944e-13	up
MSTRG.11540	0	1	0	214	46	490	0	0.03	0	7.65	1.68	17.09	0.01	8.80667	9.78245	3.28274e-13	2.27674e-12	up
MSTRG.13142	0	0	0	5	0	22	0	0	0	0.48	0	2.13	0.001	0.87	9.76487	0.00372898	0.00721338	up
CIL0996S0070	0	0	0	10	19	5	0	0	0	0.74	1.43	0.37	0.001	0.846667	9.72565	4.53691e-06	1.38742e-05	up
MSTRG.8692	0	0	0	12	2	8	0	0	0	1.37	0.23	0.91	0.001	0.836667	9.70851	0.000115267	0.000287216	up
CIL1263S0097	0	0	0	11	0	13	0	0	0	1.13	0	1.33	0.001	0.82	9.67948	0.00327908	0.00641523	up
CIL1568S0004	0	3	4	1281	2266	1092	0	0.21	0.27	106.5	191.09	90.59	0.16	129.393	9.65948	3.35749e-45	1.68902e-43	up
CIL1404S0002	0	0	0	8	1	5	0	0	0	1.36	0.17	0.85	0.001	0.793333	9.63178	0.00198693	0.00404517	up
CIL0987S0143	0	0	0	15	0	3	0	0	0	2.01	0	0.37	0.001	0.793333	9.63178	0.0127367	0.0222136	up
CIL1153S0096	9	5	5	4221	6015	2073	0.34	0.19	0.19	193.76	280.08	94.96	0.24	189.6	9.62571	3.93028e-67	5.12267e-65	up
CIL0321S0005	7	6	2	3384	3013	3392	0.52	0.45	0.15	303.88	274.45	303.95	0.373333	294.093	9.62159	7.08645e-135	4.81263e-132	up
MSTRG.25931	0	0	0	10	8	8	0	0	0	0.88	0.71	0.7	0.001	0.763333	9.57617	3.41609e-06	1.06434e-05	up
CIL1230S0072	0	0	0	1	1	19	0	0	0	0.11	0.11	2.07	0.001	0.763333	9.57617	0.0031966	0.00627097	up
CIL1047S0126	0	0	0	6	6	0	0	0	0	1.14	1.15	0	0.001	0.763333	9.57617	0.0208485	0.0346896	up
CIL0937S0117	0	0	0	13	0	2	0	0	0	1.97	0	0.3	0.001	0.756667	9.56351	0.0225936	0.0373429	up
CIL1335S0039	0	0	0	7	7	5	0	0	0	0.83	0.84	0.59	0.001	0.753333	9.55714	4.65001e-05	0.000123346	up
MSTRG.16585	21	31	47	27998	12526	20568	0.75	1.09	1.64	1198.47	542.82	877.01	1.16	872.767	9.55533	1.8264e-166	2.35669e-163	up
MSTRG.9373	0	0	0	6	13	15	0	0	0	0.39	0.86	0.97	0.001	0.74	9.53138	1.4743e-06	4.83386e-06	up
CIL0996S0059	6	3	0	2923	1190	1397	0.35	0.18	0	204.57	84.48	97.56	0.176667	128.87	9.51067	6.0903e-55	4.91163e-53	up
MSTRG.10181	0	0	0	3	0	14	0	0	0	0.38	0	1.79	0.001	0.723333	9.49852	0.0136608	0.0236496	up
CIL1619S0004	0	0	0	5	1	3	0	0	0	1.2	0.24	0.72	0.001	0.72	9.49185	0.00952262	0.0170081	up
CIL0500S0001	2	2	0	1066	439	839	0.08	0.08	0	51.67	21.58	40.58	0.0533333	37.9433	9.47459	2.48472e-36	7.94807e-35	up
CIL1466S0006	0	0	0	6	1	6	0	0	0	0.98	0.17	0.98	0.001	0.71	9.47168	0.00235908	0.00474001	up
MSTRG.14150	0	1	0	475	74	211	0.03	0.09	0	52.44	8.29	23.3	0.04	28.01	9.45173	1.72459e-14	1.34056e-13	up
CIL0212S0024	0	0	0	10	0	9	0	0	0	1.11	0	0.99	0.001	0.7	9.45121	0.00662217	0.0121905	up
CIL0163S0002	0	0	0	15	0	1	0	0	0	1.95	0	0.13	0.001	0.693333	9.43741	0.0274973	0.0446585	up
CIL1482S0021	5	6	4	2626	3210	2657	0.58	0.7	0.45	366.04	453.86	369.57	0.576667	396.49	9.42533	9.98676e-104	3.53053e-101	up
CIL1038S0099	0	0	0	2	6	2	0	0	0	0.41	1.24	0.41	0.001	0.686667	9.42347	0.00492226	0.00929728	up
CIL1143S0014	1	13	2	3110	4284	1654	0.07	0.86	0.13	247.54	345.88	131.37	0.353333	241.597	9.41735	1.22662e-38	4.47744e-37	up
CIL0355S0004	0	0	0	26	15	13	0	0	0	0.98	0.57	0.49	0.001	0.68	9.40939	1.29994e-08	5.53223e-08	up
MSTRG.18180	0	0	0	33	5	1	0	0	0	1.71	0.26	0.05	0.001	0.673333	9.39518	0.000185808	0.000449574	up
CIL1095S0037	0	0	0	6	3	3	0	0	0	1	0.51	0.5	0.001	0.67	9.38802	0.00127101	0.00267741	up
CIL1422S0004	6	5	8	4000	2507	3932	0.33	0.28	0.44	267.25	169.91	262.15	0.35	233.103	9.3794	1.58275e-142	1.36154e-139	up
MSTRG.23070	0	0	0	4	7	2	0	0	0	0.59	1.05	0.3	0.001	0.646667	9.33688	0.00127163	0.0026785	up
CIL1050S0084	0	0	0	16	9	21	0	0	0	0.67	0.38	0.88	0.001	0.643333	9.32942	5.80661e-08	2.28815e-07	up
CIL0893S0108	27	20	27	12871	10391	15470	1.29	0.96	1.27	742.5	608.04	890.53	1.17333	747.023	9.3144	0	0	up
MSTRG.6541	0	0	0	2	2	3	0	0	0	0.53	0.54	0.8	0.001	0.623333	9.28386	0.0149472	0.0256528	up
CIL0989S0048	1	0	0	225	62	258	0.07	0	0	17.58	4.93	20.05	0.0233333	14.1867	9.24793	3.77878e-14	2.84561e-13	up
CIL0906S0134	0	0	0	2	6	1	0	0	0	0.4	1.21	0.2	0.001	0.603333	9.23681	0.0108933	0.0192589	up
CIL0951S0158	0	0	0	8	0	26	0	0	0	0.42	0	1.35	0.001	0.59	9.20457	0.00158539	0.00328338	up
CIL0715S0001	0	0	0	20	1	2	0	0	0	1.51	0.08	0.15	0.001	0.58	9.17991	0.00157227	0.00325848	up
CIL1037S0031	0	0	0	11	0	9	0	0	0	0.95	0	0.78	0.001	0.576667	9.17159	0.00573882	0.0107103	up
MSTRG.4223	2	0	0	180	319	198	0.03	0	0	4.42	7.95	4.86	0.01	5.74333	9.16574	3.09146e-17	3.04509e-16	up
CIL1464S0017	4	4	6	2744	837	2801	0.26	0.26	0.39	217.79	67.39	221.84	0.303333	169.007	9.12196	6.34506e-61	6.52379e-59	up
CIL0942S0102	0	0	0	2	10	3	0	0	0	0.22	1.12	0.33	0.001	0.556667	9.12067	0.00117234	0.00248578	up
CIL0938S0034	0	0	0	7	1	14	0	0	0	0.52	0.08	1.05	0.001	0.55	9.10329	0.000443573	0.00101044	up
CIL1086S0005	0	0	0	12	6	9	0	0	0	0.72	0.37	0.54	0.001	0.543333	9.08569	3.59629e-06	1.11617e-05	up
CIL1283S0003	0	0	0	4	5	6	0	0	0	0.43	0.52	0.66	0.001	0.536667	9.06788	0.000243314	0.00057793	up
CIL1190S0077	0	0	0	27	0	1	0	0	0	1.54	0	0.06	0.001	0.533333	9.05889	0.00958931	0.0171178	up
CIL1175S0011	0	0	0	11	6	5	0	0	0	0.79	0.44	0.36	0.001	0.53	9.04985	2.49117e-05	6.86708e-05	up
CIL1050S0085	0	0	0	16	0	3	0	0	0	1.34	0	0.25	0.001	0.53	9.04985	0.0113961	0.02006	up
CIL1609S0006	0	0	0	13	2	5	0	0	0	1.02	0.16	0.39	0.001	0.523333	9.03159	0.000278898	0.000656409	up
CIL0381S0012	1	4	8	2498	1185	1770	0.04	0.14	0.28	106.53	51.26	75.32	0.153333	77.7033	8.98516	1.55528e-76	2.74911e-74	up
MSTRG.16584	5	8	0	4077	449	876	0.15	0.27	0	159.68	17.82	34.22	0.14	70.5733	8.97755	1.49788e-12	9.68334e-12	up
CIL1354S0006	0	0	3	545	198	446	0	0	0.31	69.72	25.69	56.94	0.103333	50.7833	8.94091	2.07053e-24	3.44959e-23	up
CIL1606S0013	0	0	0	6	12	0	0	0	0	0.48	0.98	0	0.001	0.486667	8.92679	0.00732564	0.0133758	up
MSTRG.2057	0	0	0	7	0	7	0	0	0	0.73	0	0.73	0.001	0.486667	8.92679	0.0156856	0.0267937	up
CIL1467S0006	0	0	0	7	3	10	0	0	0	0.51	0.22	0.72	0.001	0.483333	8.91687	7.91727e-05	0.00020274	up
CIL0990S0017	135	181	167	65934	54167	68968	12.05	16.29	14.7	7114.07	5928.33	7425.56	14.3467	6822.65	8.89347	0	0	up
CIL0899S0151	0	0	0	11	0	7	0	0	0	0.85	0	0.54	0.001	0.463333	8.85591	0.00816395	0.0147778	up
CIL1025S0155	1	0	2	595	104	438	0.02	0	0.05	16.77	2.97	12.32	0.0233333	10.6867	8.8392	6.1114e-20	7.38721e-19	up
CIL0037S0006	9	13	15	3893	5232	4724	1.2	1.75	1.97	626.85	854.54	759.03	1.64	746.807	8.8309	1.39379e-139	1.12405e-136	up
CIL0037S0002	8	2	17	4647	1709	3706	0.81	0.21	1.71	571.85	213.32	455.06	0.91	413.41	8.82749	1.23783e-60	1.25273e-58	up
CIL1092S0035	0	0	0	1	10	2	0	0	0	0.1	1.03	0.2	0.001	0.443333	8.79225	0.00458441	0.00871506	up
CIL1031S0049	0	0	0	9	0	3	0	0	0	1	0	0.33	0.001	0.443333	8.79225	0.0290163	0.0468542	up
CIL1078S0102	3	2	4	1494	192	1568	0.19	0.13	0.26	116.92	15.24	122.45	0.193333	84.87	8.77802	6.98794e-30	1.60016e-28	up
CIL1135S0042	0	0	1	228	33	85	0	0	0.06	17.03	2.5	6.34	0.02	8.62333	8.7521	2.32367e-11	1.34034e-10	up
MSTRG.24027	0	0	1	215	13	114	0	0	0.08	21.39	1.31	11.32	0.0266667	11.34	8.73217	5.40859e-10	2.69458e-09	up
CIL0990S0165	0	0	0	3	1	12	0	0	0	0.24	0.08	0.95	0.001	0.423333	8.72565	0.00226608	0.00456632	up
CIL1021S0084	0	0	0	8	2	6	0	0	0	0.62	0.16	0.46	0.001	0.413333	8.69116	0.00042024	0.000961107	up
CIL1371S0069	0	0	0	13	0	3	0	0	0	1.01	0	0.23	0.001	0.413333	8.69116	0.0162033	0.0275757	up
CIL0976S0011	7	4	1	1415	190	2452	0.2	0.11	0.03	48.56	6.61	83.98	0.113333	46.3833	8.67689	4.62431e-25	8.00936e-24	up
CIL1444S0033	0	0	1	75	169	113	0	0	0.04	3.37	7.7	5.06	0.0133333	5.37667	8.65553	3.33876e-13	2.31435e-12	up
CIL0940S0027	7	7	3	3033	1966	565	0.4	0.4	0.17	208.62	137.17	38.78	0.323333	128.19	8.63105	1.59196e-40	6.42937e-39	up
CIL0026S0014	34	28	19	8859	3123	13681	0.9	0.75	0.5	284.75	101.82	438.8	0.716667	275.123	8.58456	1.22413e-71	1.85831e-69	up
CIL1221S0003	0	0	0	10	4	4	0	0	0	0.62	0.25	0.25	0.001	0.373333	8.54432	0.000147497	0.000362588	up
CIL0895S0087	0	0	0	13	0	12	0	0	0	0.58	0	0.54	0.001	0.373333	8.54432	0.00288088	0.00569796	up
CIL1086S0040	1	1	0	161	166	275	0.09	0.09	0	17.9	18.72	30.51	0.06	22.3767	8.54282	1.85841e-17	1.86615e-16	up
MSTRG.12021	0	2	0	193	117	304	0	0.14	0	16.29	10.02	25.6	0.0466667	17.3033	8.53444	9.95235e-17	9.3943e-16	up
CIL1481S0018	0	0	0	6	6	6	0	0	0	0.36	0.37	0.36	0.001	0.363333	8.50515	5.87106e-05	0.000153463	up
CIL1283S0016	0	0	0	4	0	11	0	0	0	0.28	0	0.79	0.001	0.356667	8.47843	0.0155036	0.0265056	up
CIL0938S0047	0	0	0	6	3	5	0	0	0	0.45	0.23	0.37	0.001	0.35	8.45121	0.000438533	0.000999931	up
CIL1266S0046	0	0	0	5	1	2	0	0	0	0.66	0.13	0.26	0.001	0.35	8.45121	0.0162335	0.0276217	up
CIL1118S0012	0	0	0	10	3	0	0	0	0	0.81	0.22	0	0.001	0.343333	8.42347	0.023186	0.0382193	up
MSTRG.12515	0	0	0	1	4	4	0	0	0	0.11	0.45	0.45	0.001	0.336667	8.39518	0.00831405	0.0150316	up
CIL1029S0013	0	0	0	16	1	10	0	0	0	0.59	0.04	0.37	0.001	0.333333	8.38082	0.000182911	0.000443202	up
CIL1259S0084	0	3	4	1119	554	187	0	0.17	0.22	75.67	38	12.62	0.13	42.0967	8.33905	9.21344e-25	1.57183e-23	up
CIL0990S0055	0	1	0	133	70	56	0	0.1	0	16.27	8.69	6.84	0.0333333	10.6	8.31288	2.68105e-12	1.68962e-11	up
CIL1577S0032	0	0	0	4	6	2	0	0	0	0.29	0.5	0.16	0.001	0.316667	8.30682	0.00163869	0.00338372	up
CIL1582S0013	1	1	2	353	207	469	0.02	0.02	0.04	8.67	5.16	11.5	0.0266667	8.44333	8.30663	7.93756e-29	1.71418e-27	up
CIL1192S0064	6	5	19	1676	4247	1620	0.53	0.44	1.64	177.87	457.19	171.56	0.87	268.873	8.2717	3.51834e-41	1.46448e-39	up
CIL0923S0198	1	0	0	154	13	60	0.04	0	0	8.15	0.7	3.17	0.0133333	4.00667	8.23122	3.52671e-09	1.60264e-08	up
CIL0021S0002	11	16	5	3807	1381	2743	0.45	0.65	0.2	186.36	68.57	133.99	0.433333	129.64	8.22482	7.57901e-75	1.23013e-72	up
CIL0925S0024	0	0	0	8	1	3	0	0	0	0.59	0.07	0.22	0.001	0.293333	8.1964	0.00449529	0.00856099	up
CIL1608S0009	0	1	0	216	3	14	0	0.04	0	10.09	0.14	0.66	0.0133333	3.63	8.08879	1.38592e-06	4.55913e-06	up
CIL1084S0037	1	0	2	144	294	212	0.11	0	0.21	18.68	38.68	27.44	0.106667	28.2667	8.04985	5.20223e-20	6.30893e-19	up
CIL0996S0039	0	0	0	4	3	2	0	0	0	0.34	0.26	0.17	0.001	0.256667	8.00375	0.00524829	0.00986329	up
CIL1587S0006	1	0	1	117	219	76	0.21	0	0.21	30.08	57.1	19.49	0.14	35.5567	7.98855	1.24514e-13	8.95328e-13	up
MSTRG.4470	7	2	2	1066	316	914	0.64	0.18	0.18	117.58	35.36	100.6	0.333333	84.5133	7.98607	3.20791e-40	1.27364e-38	up
CIL1165S0020	0	0	0	7	3	2	0	0	0	0.44	0.19	0.13	0.001	0.253333	7.98489	0.00205287	0.00416989	up
CIL1032S0063	1	12	12	1373	2212	1616	0.06	0.68	0.67	93.67	153.08	110.01	0.47	118.92	7.98311	5.39181e-48	3.03813e-46	up
CIL1105S0049	0	0	0	10	3	0	0	0	0	0.56	0.17	0	0.001	0.243333	7.92679	0.023186	0.0382193	up
CIL1507S0007	0	0	0	2	5	4	0	0	0	0.13	0.33	0.26	0.001	0.24	7.90689	0.00223346	0.00450726	up
CIL0957S0086	0	0	0	2	3	1	0	0	0	0.24	0.36	0.12	0.001	0.24	7.90689	0.0309077	0.0496258	up
MSTRG.1537	0	3	2	500	172	342	0	0.15	0.07	25.09	8.52	19.18	0.0733333	17.5967	7.90662	1.02934e-28	2.20816e-27	up
CIL0957S0025	143	210	151	53660	22854	22044	4.92	7.28	5.12	2230.57	963.64	914.38	5.77333	1369.53	7.89006	2.33091e-107	9.11421e-105	up
MSTRG.12070	4	6	18	4397	563	494	0.17	0.26	0.73	220.92	28.68	24.78	0.386667	91.46	7.88591	1.35649e-21	1.86505e-20	up
CIL0420S0007	32	21	20	6824	3367	3797	7.37	4.87	4.54	1899.23	950.54	1054.51	5.59333	1301.43	7.86217	2.86228e-129	1.75874e-126	up
CIL1391S0024	0	1	0	125	6	47	0	0.03	0	4.87	0.24	1.83	0.01	2.31333	7.85383	8.35202e-08	3.22328e-07	up
CIL0948S0197	8	4	6	1870	546	1032	0.24	0.12	0.18	67.4	19.96	37.12	0.18	41.4933	7.84874	8.1102e-54	6.11988e-52	up
CIL1063S0084	0	0	1	166	2	11	0	0	0.1	21.01	0.26	1.39	0.0333333	7.55333	7.824	5.49398e-06	1.66373e-05	up
CIL0156S0018	418	504	751	113301	69495	119576	25.25	30.7	44.73	8273.79	5147.7	8713.4	33.56	7378.3	7.7804	1.12693e-185	2.07734e-182	up
CIL1087S0075	1	0	0	53	41	75	0.08	0	0	5.28	4.15	7.46	0.0266667	5.63	7.72195	3.38258e-11	1.91603e-10	up
CIL1367S0014	44	101	122	16025	11825	17858	1.31	3.03	3.58	577.09	431.95	641.73	2.64	550.257	7.70342	3.75089e-105	1.36337e-102	up
CIL1246S0103	2	5	6	1421	283	493	0.1	0.25	0.3	86.74	17.52	30.03	0.216667	44.7633	7.6907	5.57303e-32	1.40452e-30	up
CIL1449S0006	150	159	224	46769	19925	22568	10.74	11.48	15.81	4048.42	1749.5	1949.36	12.6767	2582.43	7.67041	7.43949e-125	4.17372e-122	up
CIL1565S0024	0	1	0	73	39	64	0	0.08	0	6.68	3.62	5.85	0.0266667	5.38333	7.65732	1.93121e-11	1.12174e-10	up
CIL0101S0008	34	42	21	6258	2669	7237	4.89	6.1	2.98	1089.02	471.13	1256.7	4.65667	938.95	7.65561	1.27635e-86	2.76796e-84	up
CIL0320S0009	1	0	0	20	138	9	0.09	0	0	2.14	14.97	0.96	0.03	6.02333	7.64946	2.6847e-07	9.69628e-07	up
CIL1101S0013	0	0	0	3	1	3	0	0	0	0.26	0.09	0.25	0.001	0.2	7.64386	0.0200816	0.033518	up
CIL1546S0058	16	22	16	5201	1820	1684	0.65	0.93	0.64	261.31	92.74	84.44	0.74	146.163	7.62584	2.42238e-62	2.57261e-60	up
CIL1370S0002	0	0	0	12	0	6	0	0	0	0.39	0	0.2	0.001	0.196667	7.61961	0.0087148	0.0156956	up
MSTRG.10182	1	3	4	762	62	461	0.09	0.28	0.36	84.5	6.97	51.01	0.243333	47.4933	7.60865	2.43812e-19	2.83545e-18	up
CIL1225S0037	0	0	2	234	31	50	0	0	0.11	15.66	2.11	3.35	0.0366667	7.04	7.58496	5.21701e-10	2.60215e-09	up
CIL1546S0059	79	85	40	20226	5371	6265	1.87	2.05	0.93	582.61	156.92	180.07	1.61667	306.533	7.56688	1.22837e-51	8.34223e-50	up
CIL1607S0024	4	13	12	1686	1436	1338	0.29	0.95	0.86	147.46	127.4	116.78	0.7	130.547	7.54299	2.0081e-108	8.22589e-106	up
CIL1266S0047	1	0	0	56	24	68	0.07	0	0	4.89	2.13	5.93	0.0233333	4.31667	7.53138	4.02408e-10	2.03547e-09	up
CIL1232S0009	0	0	0	7	4	0	0	0	0	0.35	0.2	0	0.001	0.183333	7.51833	0.0284443	0.0460227	up
MSTRG.25270	12	15	12	4022	530	1151	0.44	0.56	0.44	180.3	24.1	51.49	0.48	85.2967	7.47331	3.31068e-33	8.93711e-32	up
CIL0962S0021	3	1	9	632	551	679	0.19	0.07	0.57	49.32	43.62	52.88	0.276667	48.6067	7.45686	3.35391e-68	4.55549e-66	up
CIL0170S0010	20	39	28	3668	3167	5734	0.71	1.39	0.98	157.22	137.69	245.24	1.02667	180.05	7.45429	1.41862e-113	6.20516e-111	up
CIL1463S0029	1	7	6	623	817	544	0.09	0.61	0.51	65.29	86.85	56.89	0.403333	69.6767	7.43256	6.04888e-50	3.76153e-48	up
CIL1436S0046	0	0	1	74	23	31	0	0	0.05	4.93	1.56	2.06	0.0166667	2.85	7.41785	3.08163e-09	1.41006e-08	up
CIL1163S0049	0	0	0	2	6	2	0	0	0	0.1	0.31	0.1	0.001	0.17	7.40939	0.00492226	0.00929728	up
MSTRG.15557	1	0	1	204	4	50	0.05	0	0.05	13.37	0.27	3.27	0.0333333	5.63667	7.40173	1.52485e-07	5.67845e-07	up
CIL1277S0064	5	10	10	1579	536	1363	0.42	0.86	0.84	162.05	55.8	139.58	0.706667	119.143	7.39745	9.67001e-59	9.14117e-57	up
CIL1132S0055	36	36	43	6302	2993	6520	2.06	2.08	2.43	436.32	210.2	450.45	2.19	365.657	7.38341	1.90418e-139	1.48912e-136	up
CIL1075S0003	0	0	0	4	1	5	0	0	0	0.2	0.05	0.25	0.001	0.166667	7.38082	0.00616334	0.0114232	up
CIL1387S0013	9	9	6	2044	320	921	0.5	0.51	0.33	138.55	22	62.3	0.446667	74.2833	7.3777	4.09561e-35	1.23045e-33	up
CIL1599S0013	4	0	7	406	557	496	0.33	0	0.57	40.48	56.38	49.32	0.3	48.7267	7.34361	7.81275e-44	3.71314e-42	up
CIL0970S0155	33	48	60	4693	8872	5158	1.6	2.34	2.86	274.5	526.38	301.05	2.26667	367.31	7.34028	5.49468e-76	9.26805e-74	up
CIL0948S0228	48	120	94	18772	7083	8966	1.46	3.68	2.82	690.81	264.4	329.25	2.65333	428.153	7.33418	2.02005e-68	2.77295e-66	up
CIL1075S0007	2	1	1	296	145	76	0.11	0.05	0.05	18.93	9.41	4.85	0.07	11.0633	7.30422	1.9247e-18	2.09228e-17	up
CIL1114S0034	1	0	3	278	46	171	0.13	0	0.39	44.68	7.5	27.42	0.173333	26.5333	7.25811	8.30902e-16	7.33599e-15	up
CIL1225S0036	5	6	17	2476	314	739	0.35	0.41	1.07	196.34	25.25	58.49	0.61	93.36	7.25785	3.64485e-25	6.35559e-24	up
CIL1060S0114	0	1	0	25	78	18	0	0.11	0	3.42	10.83	2.46	0.0366667	5.57	7.24706	4.33596e-08	1.7362e-07	up
CIL0906S0139	3	4	1	533	166	297	0.26	0.35	0.09	56.14	17.74	31.22	0.233333	35.0333	7.23019	3.78701e-31	9.23738e-30	up
CIL1221S0029	3	0	0	154	68	144	0.11	0	0	6.9	3.09	6.44	0.0366667	5.47667	7.22269	2.68001e-17	2.65501e-16	up
MSTRG.16976	4	3	3	185	691	368	0.39	0.29	0.29	21.29	80.68	42.25	0.323333	48.0733	7.21607	5.17137e-27	1.01721e-25	up
MSTRG.22868	11	12	18	4540	114	373	0.42	0.46	0.68	209.09	5.33	17.14	0.52	77.1867	7.2137	3.15017e-09	1.43989e-08	up
CIL0895S0020	64	27	58	16127	263	1769	1.82	0.78	1.63	555.99	9.2	60.86	1.41	208.683	7.20948	7.13236e-09	3.13249e-08	up
CIL1053S0018	0	4	0	322	16	142	0	0.25	0	24.06	1.21	10.59	0.0833333	11.9533	7.1643	2.24483e-05	6.22392e-05	up
CIL1171S0056	3	1	1	256	145	188	0.1	0.03	0.03	9.88	5.68	7.24	0.0533333	7.6	7.15482	1.13431e-28	2.42728e-27	up
CIL1066S0083	0	1	3	380	29	55	0	0.07	0.22	33.69	2.57	4.87	0.0966667	13.71	7.14799	9.91095e-11	5.33191e-10	up
CIL0100S0026	0	0	1	93	6	20	0	0	0.05	5.51	0.36	1.18	0.0166667	2.35	7.13955	8.49618e-07	2.87782e-06	up
CIL1602S0006	0	0	0	3	1	4	0	0	0	0.16	0.05	0.21	0.001	0.14	7.12928	0.0132981	0.0230805	up
CIL1051S0068	29	54	25	3178	5062	4192	1.62	3.05	1.38	215.24	347.76	283.31	2.01667	282.103	7.12811	5.68478e-76	9.52644e-74	up
CIL0046S0021	8	6	7	312	1467	615	1.4	1.06	1.21	66.22	315.84	130.26	1.22333	170.773	7.12512	4.17496e-29	9.15405e-28	up
CIL1092S0063	2	2	3	329	253	232	0.17	0.17	0.25	33.04	25.77	23.25	0.196667	27.3533	7.11982	2.26176e-38	8.11812e-37	up
CIL1325S0050	0	1	0	15	85	10	0	0.08	0	1.47	8.45	0.98	0.0266667	3.63333	7.09011	7.72036e-07	2.62987e-06	up
MSTRG.13141	0	0	1	54	8	47	0	0	0.08	5.36	0.81	4.66	0.0266667	3.61	7.08082	8.91022e-08	3.42436e-07	up
MSTRG.2729	0	1	0	59	14	58	0	0.03	0	1.82	0.44	1.79	0.01	1.35	7.07682	5.96434e-09	2.63971e-08	up
CIL1434S0041	4	2	0	184	159	320	0.32	0.16	0	17.67	15.49	30.67	0.16	21.2767	7.05506	1.3009e-27	2.65393e-26	up
CIL0938S0026	3	0	0	83	106	130	0.22	0	0	7.53	9.75	11.76	0.0733333	9.68	7.04439	6.08362e-17	5.84077e-16	up
CIL0030S0013	4	15	14	1982	994	589	0.18	0.67	0.61	106.58	54.22	31.61	0.486667	64.1367	7.04207	4.94528e-39	1.8416e-37	up
CIL1551S0016	25	33	21	4233	1107	3100	1.61	2.15	1.34	330.05	87.55	241.19	1.7	219.597	7.01318	3.33453e-59	3.19904e-57	up
CIL1458S0035	2	3	1	353	55	220	0.13	0.19	0.06	26.8	4.24	16.67	0.126667	15.9033	6.97215	7.47617e-19	8.37039e-18	up
CIL0982S0141	3	1	3	463	102	167	0.13	0.04	0.13	23.66	5.29	8.51	0.1	12.4867	6.96424	4.96976e-22	7.04695e-21	up
CIL0006S0003	5	2	2	353	271	285	0.34	0.14	0.13	29	22.59	23.37	0.203333	24.9867	6.94117	8.71952e-47	4.68801e-45	up
MSTRG.2801	24	16	44	3126	2914	2274	0.66	0.45	1.2	104.43	98.74	75.81	0.77	92.9933	6.91613	6.49688e-87	1.43303e-84	up
CIL0935S0025	1	2	6	451	267	144	0.08	0.17	0.5	45.78	27.46	14.54	0.25	29.26	6.87086	2.10039e-26	3.9798e-25	up
CIL1060S0050	13	9	13	1430	545	1319	0.55	0.38	0.54	72.67	28.09	66.88	0.49	55.88	6.83341	1.05947e-66	1.37395e-64	up
MSTRG.24122	0	1	0	55	40	2	0	0.04	0	2.56	1.89	0.09	0.0133333	1.51333	6.82655	4.42453e-06	1.35562e-05	up
MSTRG.24691	4	0	0	132	152	81	0.18	0	0	7.28	8.51	4.46	0.06	6.75	6.81378	1.41072e-17	1.43219e-16	up
CIL0984S0032	6	2	4	366	313	418	0.34	0.11	0.22	24.97	21.66	28.46	0.223333	25.03	6.80832	1.57732e-56	1.3131e-54	up
MSTRG.6453	62	88	122	10644	8994	6255	2.73	4.3	6.37	527.08	600.04	347.9	4.46667	491.673	6.78236	4.91219e-102	1.66801e-99	up
CIL0285S0005	30	15	17	2122	855	2556	0.46	0.23	0.26	39.53	16.16	47.51	0.316667	34.4	6.7633	1.24971e-59	1.21703e-57	up
CIL0946S0082	8	14	8	2051	246	396	0.32	0.56	0.31	97.78	11.9	18.84	0.396667	42.84	6.75489	5.69626e-22	8.04176e-21	up
MSTRG.11541	4	0	7	313	139	499	0.11	0	0.19	10.62	4.8	16.89	0.1	10.77	6.75087	1.24433e-24	2.10435e-23	up
MSTRG.5585	70	113	40	12294	3242	3920	1.81	2.97	1.02	386.01	103.26	122.81	1.93333	204.027	6.72152	1.51497e-37	5.19213e-36	up
CIL1130S0074	8	4	9	1269	245	296	0.5	0.25	0.55	95.66	18.73	22.27	0.433333	45.5533	6.71594	1.20543e-25	2.17239e-24	up
CIL1196S0093	16	32	22	2794	1928	1252	1.15	2.31	1.55	242.1	169.46	108.26	1.67	173.273	6.69706	1.17112e-68	1.6249e-66	up
CIL0902S0002	42	33	62	4562	3175	3907	0.89	0.71	1.3	117.34	82.83	100.26	0.966667	100.143	6.69483	1.31036e-186	2.60126e-183	up
CIL1015S0127	5	0	1	138	188	183	1.02	0	0.2	33.92	46.87	44.88	0.406667	41.89	6.68662	1.40019e-25	2.51284e-24	up
CIL1057S0032	0	3	0	122	80	57	0	0.15	0	7.22	4.81	3.37	0.05	5.13333	6.68182	8.45767e-15	6.81446e-14	up
CIL1153S0014	61	56	41	6133	2769	4403	2.73	2.52	1.81	331.29	151.72	237.33	2.35333	240.113	6.67287	6.05997e-122	3.12779e-119	up
CIL1304S0035	9	13	16	686	1623	846	0.5	0.73	0.88	46.35	111.23	57.04	0.703333	71.54	6.6684	7.62282e-44	3.62956e-42	up
CIL1180S0001	3	0	1	88	129	116	0.31	0	0.1	10.89	16.2	14.33	0.136667	13.8067	6.65856	3.90691e-19	4.45934e-18	up
CIL1603S0003	0	3	1	186	7	132	0	0.12	0.04	9	0.34	6.37	0.0533333	5.23667	6.61747	5.12858e-09	2.29104e-08	up
CIL0355S0003	0	1	3	237	40	39	0	0.03	0.1	9.46	1.62	1.55	0.0433333	4.21	6.6022	4.62997e-11	2.58459e-10	up
MSTRG.22537	1	0	2	54	87	83	0.03	0	0.06	2.08	3.4	3.19	0.03	2.89	6.58996	1.80882e-14	1.40349e-13	up
CIL0340S0001	22	26	16	1537	539	2962	0.79	0.94	0.57	66.94	23.81	128.72	0.766667	73.1567	6.57625	4.03848e-36	1.27722e-34	up
CIL1158S0041	3	1	0	183	24	99	0.16	0.05	0	11.96	1.59	6.46	0.07	6.67	6.57419	3.92317e-12	2.42969e-11	up
MSTRG.28054	1	1	0	84	42	32	0.17	0.17	0	16.97	8.61	6.45	0.113333	10.6767	6.55775	2.30204e-10	1.19319e-09	up
CIL1358S0031	0	6	9	878	154	122	0	0.35	0.51	61.19	10.89	8.48	0.286667	26.8533	6.54958	2.3102e-13	1.62717e-12	up
CIL1148S0045	14	9	10	288	1747	459	0.92	0.59	0.65	22.79	140.25	36.25	0.72	66.43	6.52769	9.1447e-22	1.27085e-20	up
MSTRG.24835	0	0	4	142	142	10	0	0	0.2	8.85	8.97	0.62	0.0666667	6.14667	6.52669	3.13182e-08	1.273e-07	up
CIL0970S0127	15	17	12	541	2232	525	1.22	1.39	0.96	53.18	222.57	51.5	1.19	109.083	6.51833	3.98665e-25	6.92817e-24	up
CIL1303S0057	7	2	4	309	233	418	0.35	0.1	0.19	18.46	14.12	24.92	0.213333	19.1667	6.48935	4.30182e-46	2.25645e-44	up
CIL1265S0061	5	4	4	651	148	175	0.14	0.11	0.11	21.56	4.97	5.78	0.12	10.77	6.48784	2.71764e-24	4.49003e-23	up
CIL0909S0185	3	2	0	109	179	81	0.29	0.2	0	12.9	21.49	9.57	0.163333	14.6533	6.48727	4.11715e-18	4.37248e-17	up
CIL0006S0011	44	31	53	8378	175	820	1.86	1.32	2.2	427.3	9.05	41.73	1.79333	159.36	6.4735	5.88943e-08	2.31937e-07	up
CIL1020S0108	239	281	264	21765	12494	22770	22.51	26.69	24.52	2478.84	1443.38	2587.77	24.5733	2170	6.46446	3.34171e-208	1.078e-204	up
CIL1143S0026	70	59	35	2490	5904	3495	5.31	4.51	2.62	228.23	548.92	319.67	4.14667	365.607	6.4622	4.34042e-49	2.58095e-47	up
MSTRG.10625	0	0	1	22	13	29	0	0	0.04	1.2	0.72	1.57	0.0133333	1.16333	6.44708	1.52308e-07	5.67272e-07	up
CIL1204S0022	397	393	522	26322	40397	24156	9.62	9.61	12.48	771.41	1200.89	706.42	10.57	892.907	6.40046	1.67836e-92	4.37509e-90	up
CIL1476S0044	0	0	1	66	0	3	0	0	0.09	7.26	0	0.33	0.03	2.53	6.39803	0.00131143	0.00275558	up
CIL0431S0008	0	3	0	99	8	98	0	0.12	0	4.84	0.4	4.78	0.04	3.34	6.3837	5.31253e-08	2.10567e-07	up
CIL1323S0048	0	0	1	47	13	7	0	0	0.13	7.4	2.08	1.1	0.0433333	3.52667	6.34668	3.41977e-06	1.06535e-05	up
MSTRG.7503	96	144	109	7739	9692	5852	10.17	15.39	11.39	991.58	1259.63	748.2	12.3167	999.803	6.34296	4.96195e-90	1.18568e-87	up
CIL1159S0001	1	0	0	36	12	23	0.03	0	0	1.23	0.41	0.79	0.01	0.81	6.33985	1.32095e-07	4.9549e-07	up
CIL1025S0050	169	227	226	16797	12710	11498	8.23	11.14	10.85	988.67	758.84	675.33	10.0733	807.613	6.32505	5.4512e-190	1.34381e-186	up
CIL1481S0027	57	77	93	6190	4123	4551	2.9	3.94	4.64	380.61	257.14	279.23	3.82667	305.66	6.3197	7.45877e-173	1.20305e-169	up
MSTRG.9232	5	7	1	495	105	250	0.2	0.29	0.04	24.52	5.28	12.36	0.176667	14.0533	6.31374	2.00016e-22	2.89501e-21	up
CIL1449S0008	493	615	873	57463	42555	29024	41.05	51.63	71.67	5784.26	4345.09	2915.34	54.7833	4348.23	6.31055	7.93048e-90	1.87763e-87	up
MSTRG.8627	1	7	3	358	26	307	0.02	0.17	0.07	10.6	0.77	9.06	0.0866667	6.81	6.29603	6.49826e-13	4.36948e-12	up
CIL0893S0302	5	10	3	317	545	303	0.72	1.44	0.42	54.82	95.61	52.29	0.86	67.5733	6.29597	3.32298e-34	9.45492e-33	up
CIL1090S0058	3	0	1	118	57	74	0.21	0	0.07	10.01	4.9	6.26	0.0933333	7.05667	6.24045	4.05357e-17	3.94757e-16	up
MSTRG.25268	3	5	6	490	77	281	0.1	0.17	0.2	20.41	3.25	11.68	0.156667	11.78	6.2325	6.45466e-22	9.06779e-21	up
MSTRG.1203	0	3	0	66	82	36	0	0.08	0	2.12	2.68	1.16	0.0266667	1.98667	6.21917	8.98002e-12	5.38822e-11	up
MSTRG.22581	1	2	4	93	156	168	0.05	0.1	0.2	5.79	9.85	10.43	0.116667	8.69	6.21889	2.33077e-23	3.5932e-22	up
MSTRG.22867	0	1	0	37	17	11	0	0.04	0	1.68	0.79	0.5	0.0133333	0.99	6.21432	5.21109e-07	1.81905e-06	up
CIL0893S0164	11	11	6	610	138	962	0.4	0.4	0.21	26.61	6.11	41.91	0.336667	24.8767	6.20733	1.96482e-24	3.27983e-23	up
CIL0475S0002	0	2	0	58	39	27	0	0.17	0	5.85	3.99	2.72	0.0566667	4.18667	6.20716	1.22998e-09	5.89016e-09	up
CIL1434S0039	1	7	11	960	60	144	0.04	0.25	0.39	41.4	2.62	6.2	0.226667	16.74	6.20658	2.06662e-11	1.19688e-10	up
MSTRG.23817	52	76	74	5943	3135	3177	3.81	5.62	5.35	526.89	281.96	281.1	4.92667	363.317	6.20447	8.83962e-102	2.96265e-99	up
CIL1380S0014	10	3	2	274	236	390	1.14	0.34	0.22	37.69	32.93	53.54	0.566667	41.3867	6.19052	1.01595e-40	4.15509e-39	up
MSTRG.19954	14	11	18	1412	557	611	0.36	0.29	0.46	43.94	17.58	18.97	0.37	26.83	6.18018	9.20198e-53	6.72735e-51	up
CIL0942S0123	21	37	24	2197	935	1744	1.07	1.89	1.2	134.89	58.23	106.85	1.38667	99.99	6.17209	2.10945e-75	3.48966e-73	up
MSTRG.12068	4	8	4	474	243	226	0.2	0.41	0.2	29.12	15.14	13.86	0.27	19.3733	6.16497	1.84985e-39	7.05156e-38	up
CIL1201S0044	3	1	0	189	2	47	0.32	0.11	0	24.4	0.26	6.06	0.143333	10.24	6.1587	2.00503e-06	6.46798e-06	up
CIL1071S0055	8	8	12	958	292	380	0.66	0.66	0.97	94.84	29.32	37.54	0.763333	53.9	6.14183	1.3017e-37	4.49104e-36	up
CIL1386S0054	2	1	0	39	97	38	0.49	0.25	0	11.46	28.92	11.14	0.246667	17.1733	6.12146	6.70914e-11	3.67763e-10	up
MSTRG.16394	1	2	2	15	170	95	0.06	0.13	0.12	1.14	13.15	7.23	0.103333	7.17333	6.11727	1.28128e-10	6.80928e-10	up
CIL1100S0106	26	24	25	487	2988	772	2.14	1.99	2.03	48.44	301.48	76.63	2.05333	142.183	6.11364	1.95923e-21	2.65417e-20	up
CIL1066S0034	6	4	5	269	362	225	0.17	0.11	0.14	9.04	12.34	7.54	0.14	9.64	6.10553	3.38399e-39	1.27676e-37	up
MSTRG.21418	80	48	102	3475	5321	4034	9.41	5.69	11.83	494.21	767.61	572.49	8.97667	611.437	6.08988	1.01075e-70	1.49054e-68	up
CIL1564S0026	1	0	0	43	2	9	0.06	0	0	3.24	0.15	0.68	0.02	1.35667	6.08392	8.60607e-05	0.000219074	up
CIL0370S0004	0	1	2	92	28	37	0	0.04	0.08	4.74	1.46	1.9	0.04	2.7	6.07682	6.2141e-11	3.42227e-10	up
CIL0355S0006	5	12	8	677	316	388	0.14	0.33	0.22	22.63	10.71	12.94	0.23	15.4267	6.06765	2.00741e-50	1.27914e-48	up
CIL0026S0017	637	722	768	47445	19283	49603	11.55	13.2	13.72	1039.58	428.58	1084.55	12.8233	850.903	6.05215	8.41522e-92	2.12913e-89	up
CIL0917S0160	20	10	8	1469	315	289	0.85	0.43	0.33	75.06	16.33	14.74	0.536667	35.3767	6.04263	4.77275e-22	6.77504e-21	up
CIL1418S0003	0	3	0	92	14	62	0	0.12	0	4.31	0.65	2.91	0.04	2.62333	6.03526	5.54672e-09	2.468e-08	up
MSTRG.24291	6	0	3	171	127	180	0.23	0	0.11	7.78	5.86	8.17	0.113333	7.27	6.00331	1.7081e-33	4.71959e-32	up
CIL1086S0064	3	0	5	103	192	122	0.36	0	0.59	14.95	28.2	17.71	0.316667	20.2867	6.00142	1.01662e-20	1.30009e-19	up
CIL1076S0001	25	12	17	365	1833	606	1.86	0.9	1.25	32.78	166.96	54.3	1.33667	84.68	5.98531	4.26534e-22	6.06477e-21	up
CIL0282S0007	0	1	0	50	0	3	0	0.1	0	5.94	0	0.36	0.0333333	2.1	5.97728	0.00224059	0.00452059	up
CIL0452S0002	44	49	17	2171	1096	2455	1.02	1.15	0.39	60.87	31.17	68.68	0.853333	53.5733	5.97226	4.12694e-50	2.59766e-48	up
CIL1071S0104	288	216	278	11974	14813	13402	12.54	9.48	11.93	630.2	790.81	703.86	11.3167	708.29	5.96782	1.60971e-155	1.80617e-152	up
MSTRG.26797	77	106	158	9900	1353	6095	5.76	8	11.72	898.67	124.88	552.27	8.49333	525.273	5.95059	2.47575e-27	4.93752e-26	up
CIL0945S0099	7	32	25	2881	56	272	0.21	0.89	0.68	97.51	1.93	9.19	0.593333	36.21	5.9314	4.24096e-06	1.30355e-05	up
CIL1028S0027	3	0	7	138	229	128	0.16	0	0.37	8.94	15.04	8.27	0.176667	10.75	5.92716	7.3811e-21	9.54808e-20	up
CIL0990S0115	10	47	33	1706	1797	999	0.5	2.37	1.63	103.01	110.06	60.19	1.5	91.0867	5.92421	2.92365e-33	7.95054e-32	up
CIL1235S0012	1	1	5	166	93	82	0.08	0.08	0.39	15.89	9.03	7.83	0.183333	10.9167	5.89592	1.45623e-21	1.99792e-20	up
CIL1219S0030	38	14	19	1540	815	1118	5.5	2.04	2.71	269.67	144.76	195.35	3.41667	203.26	5.89459	2.1997e-64	2.54564e-62	up
CIL0049S0018	33	36	31	2390	982	1524	1.28	1.4	1.16	110.84	46.2	70.56	1.28	75.8667	5.88925	1.40117e-83	2.86985e-81	up
CIL0937S0011	20	15	16	1021	842	606	0.65	0.49	0.51	40.21	33.64	23.82	0.55	32.5567	5.88738	3.54157e-77	6.30326e-75	up
CIL1198S0021	245	289	317	11384	17083	12843	5.69	6.77	7.27	319.91	486.95	360.14	6.57667	389	5.88627	2.11893e-99	6.5099e-97	up
CIL0984S0074	1	0	0	29	2	15	0.03	0	0	1.1	0.08	0.57	0.01	0.583333	5.86625	6.06396e-05	0.000158121	up
CIL1025S0007	8	3	3	303	39	333	0.31	0.12	0.12	14.31	1.87	15.69	0.183333	10.6233	5.85662	1.32916e-15	1.15145e-14	up
CIL1087S0073	1	3	3	107	69	155	0.04	0.12	0.12	5.2	3.4	7.51	0.0933333	5.37	5.84639	2.02679e-22	2.93191e-21	up
MSTRG.26796	299	287	450	30970	4846	12929	20.08	19.44	29.76	2512.63	398.8	1046.71	23.0933	1319.38	5.83624	1.25417e-30	2.98307e-29	up
CIL0923S0084	2	3	4	68	213	141	0.12	0.18	0.23	4.85	15.4	10.03	0.176667	10.0933	5.83623	6.47665e-19	7.28292e-18	up
CIL0294S0009	2	0	1	117	20	1	0.08	0	0.04	5.77	1	0.05	0.04	2.27333	5.82867	2.88455e-05	7.87658e-05	up
CIL0984S0056	209	238	168	6897	14697	7051	24.88	28.57	19.72	992.64	2145.61	1012.64	24.39	1383.63	5.82602	3.16363e-48	1.8053e-46	up
CIL1134S0101	1	3	8	196	195	166	0.04	0.12	0.32	9.52	9.6	8.04	0.16	9.05333	5.82231	2.15406e-34	6.20424e-33	up
CIL0987S0158	1	0	0	25	6	13	0.05	0	0	1.6	0.39	0.83	0.0166667	0.94	5.81762	8.20281e-06	2.41839e-05	up
CIL1132S0030	1	2	7	400	38	28	0.08	0.16	0.53	37.19	3.58	2.6	0.256667	14.4567	5.8157	5.62317e-09	2.49943e-08	up
MSTRG.2904	2	0	0	25	29	38	0.1	0	0	1.49	1.76	2.27	0.0333333	1.84	5.7866	8.53549e-09	3.71084e-08	up
CIL1344S0020	1	5	3	160	61	178	0.06	0.31	0.18	12.06	4.66	13.39	0.183333	10.0367	5.77467	1.52771e-21	2.09044e-20	up
MSTRG.21030	0	0	3	44	43	47	0	0	0.62	11.07	10.98	11.8	0.206667	11.2833	5.77074	2.47785e-12	1.5673e-11	up
CIL1028S0005	2	0	1	94	12	31	0.09	0	0.05	5.24	0.68	1.72	0.0466667	2.54667	5.77007	2.83446e-08	1.15944e-07	up
CIL1216S0073	19	30	21	1574	456	1096	0.94	1.5	1.03	94.57	27.79	65.71	1.15667	62.69	5.76019	5.12841e-45	2.55008e-43	up
CIL0414S0008	11	11	14	656	282	650	0.42	0.43	0.53	30.45	13.28	30.1	0.46	24.61	5.74147	2.27156e-54	1.78183e-52	up
CIL0049S0015	24	45	35	2076	988	1527	1.08	2.08	1.59	114.55	55.28	84.09	1.58333	84.64	5.7403	8.11724e-79	1.46491e-76	up
CIL1130S0075	1	0	0	40	0	2	0.15	0	0	7.47	0	0.37	0.05	2.61333	5.70782	0.00450648	0.0085785	up
CIL1515S0031	227	251	274	7633	14974	9574	15.01	16.74	17.87	610.43	1214.7	764.03	16.54	863.053	5.70542	1.37291e-63	1.52719e-61	up
CIL0923S0085	83	92	106	1894	6989	3064	5.77	6.45	7.27	159.19	595.87	256.98	6.49667	337.347	5.69839	7.70621e-31	1.85296e-29	up
CIL0978S0140	4	3	1	216	2	114	0.13	0.1	0.03	8.78	0.08	4.63	0.0866667	4.49667	5.69723	3.09339e-07	1.10848e-06	up
CIL1176S0059	19	20	24	868	785	1033	1.85	1.97	2.31	102.32	93.87	121.51	2.04333	105.9	5.69563	2.3559e-126	1.38179e-123	up
CIL1263S0033	9	12	23	1012	428	415	0.32	0.43	0.81	43.96	18.86	17.99	0.52	26.9367	5.69492	5.96858e-38	2.10138e-36	up
CIL1346S0018	0	2	0	35	6	47	0	0.15	0	3.07	0.53	4.11	0.05	2.57	5.6837	1.99815e-06	6.44739e-06	up
MSTRG.3140	12	12	16	451	99	766	0.7	0.72	0.95	40.22	7.35	73.72	0.79	40.43	5.67743	1.39205e-19	1.64414e-18	up
CIL0895S0202	0	0	1	16	11	13	0	0	0.07	1.42	0.99	1.15	0.0233333	1.18667	5.66838	2.86804e-06	9.0395e-06	up
CIL1060S0069	0	0	2	24	10	46	0	0	0.08	1.21	0.51	2.31	0.0266667	1.34333	5.65464	7.45434e-07	2.54598e-06	up
CIL0895S0062	0	1	0	43	3	1	0	0.04	0	1.83	0.13	0.04	0.0133333	0.666667	5.64386	0.000710953	0.00156362	up
CIL0328S0004	4	7	3	231	62	257	0.15	0.3	0.13	12.01	3.3	13.38	0.193333	9.56333	5.62835	5.06126e-21	6.64037e-20	up
CIL0906S0093	4	7	3	231	62	257	0.15	0.3	0.13	12.01	3.3	13.38	0.193333	9.56333	5.62835	5.06126e-21	6.64037e-20	up
MSTRG.24833	7	1	17	561	342	99	0.15	0.02	0.35	14.28	8.83	2.51	0.173333	8.54	5.62262	6.43927e-14	4.76155e-13	up
CIL0203S0026	73	74	60	4081	1445	2834	1.65	1.68	1.33	111.3	39.97	77.12	1.55333	76.13	5.61503	3.37012e-70	4.88611e-68	up
CIL1053S0003	5	3	15	327	164	434	0.21	0.13	0.63	16.75	8.51	22.18	0.323333	15.8133	5.61198	1.02537e-27	2.09682e-26	up
CIL1265S0039	1164	848	1459	45651	30650	62200	48	35.26	59.32	2275.83	1549.91	3094.22	47.5267	2306.65	5.60092	1.63886e-94	4.40563e-92	up
CIL1182S0023	0	0	1	12	15	11	0	0	0.15	2.27	2.93	2.08	0.05	2.42667	5.6009	5.06794e-06	1.54086e-05	up
CIL1048S0012	11	7	16	513	517	317	1.01	0.65	1.45	56.81	58.07	35.03	1.03667	49.97	5.59104	3.4745e-47	1.91595e-45	up
CIL1210S0022	14	23	49	1271	1078	1038	0.82	1.36	2.83	90.15	77.56	73.47	1.67	80.3933	5.58916	4.01635e-49	2.3993e-47	up
MSTRG.23110	0	1	0	18	13	10	0	0.06	0	1.24	0.91	0.69	0.02	0.946667	5.56478	3.30678e-06	1.03302e-05	up
CIL1187S0083	1	9	4	205	143	202	0.04	0.32	0.14	8.79	6.22	8.64	0.166667	7.88333	5.56377	1.1879e-37	4.10942e-36	up
CIL1084S0081	339	270	344	21052	5509	9814	11.9	9.55	11.9	893.21	237.1	415.51	11.1167	515.273	5.53454	2.5992e-47	1.43943e-45	up
CIL0967S0214	2	0	0	55	11	10	0.28	0	0	9.34	1.89	1.69	0.0933333	4.30667	5.52804	7.28758e-06	2.16472e-05	up
CIL1061S0075	4	4	2	239	48	96	0.21	0.22	0.11	15.51	3.16	6.22	0.18	8.29667	5.52646	7.57468e-17	7.2266e-16	up
CIL1086S0006	113	108	106	4018	3359	5026	7.97	7.68	7.37	342.51	290.45	427.53	7.67333	353.497	5.5257	1.06217e-209	3.91592e-206	up
CIL1310S0049	6	6	24	690	72	597	0.57	0.57	2.25	79.23	8.39	68.4	1.13	52.0067	5.5243	5.88325e-14	4.3629e-13	up
CIL0049S0017	57	69	56	3569	1202	2088	2.22	2.7	2.15	168.63	57.6	98.46	2.35667	108.23	5.52121	1.25114e-60	1.26125e-58	up
CIL0945S0049	304	350	397	10633	15995	12384	13.71	15.92	17.66	579.96	884.95	674.03	15.7633	712.98	5.49922	2.69436e-90	6.49844e-88	up
CIL1061S0081	239	362	209	15664	9416	5076	8.97	13.7	7.74	710.9	433.47	229.88	10.1367	458.083	5.49795	1.96745e-42	8.75412e-41	up
CIL0993S0040	0	0	1	25	1	10	0	0	0.09	2.82	0.11	1.13	0.03	1.35333	5.49541	0.000393416	0.000904087	up
CIL0102S0008	21	19	30	2024	150	420	0.9	0.82	1.27	104.88	7.88	21.72	0.996667	44.8267	5.4911	9.53762e-15	7.6369e-14	up
CIL0291S0004	0	0	3	19	50	41	0	0	0.43	3.32	8.86	7.15	0.143333	6.44333	5.49036	1.00338e-08	4.33014e-08	up
CIL1057S0007	2	1	1	57	33	59	0.13	0.07	0.07	4.62	2.71	4.77	0.09	4.03333	5.4859	3.31806e-14	2.51555e-13	up
CIL0978S0019	8	9	10	125	557	304	0.79	0.9	0.98	15.01	67.84	36.42	0.89	39.7567	5.48125	6.10171e-21	7.94885e-20	up
CIL0049S0016	0	2	5	129	30	107	0	0.09	0.22	6.67	1.56	5.55	0.103333	4.59333	5.47416	2.50217e-13	1.75662e-12	up
CIL1225S0034	13	20	21	1399	194	358	1.06	1.62	1.69	137.08	19.27	35.03	1.45667	63.7933	5.45266	2.9174e-19	3.36865e-18	up
CIL0990S0121	7	7	14	216	487	292	0.53	0.54	1.05	19.84	45.38	26.77	0.706667	30.6633	5.43934	4.77514e-29	1.03993e-27	up
CIL1294S0044	29	17	18	1531	197	555	1.25	0.74	0.77	79.88	10.43	28.89	0.92	39.7333	5.43257	1.7677e-20	2.21236e-19	up
CIL1387S0009	0	1	0	14	4	19	0	0.08	0	1.3	0.38	1.77	0.0266667	1.15	5.43045	2.96711e-05	8.09089e-05	up
MSTRG.9112	0	0	2	18	26	27	0	0	0.2	2.17	3.18	3.24	0.0666667	2.86333	5.42459	1.19624e-07	4.51533e-07	up
CIL1141S0041	18	9	3	466	468	126	1.74	0.88	0.29	54.4	55.42	14.68	0.97	41.5	5.41898	1.19816e-17	1.2241e-16	up
CIL0922S0014	1	0	0	9	21	5	0.17	0	0	1.85	4.39	1.03	0.0566667	2.42333	5.41835	5.4177e-05	0.000142537	up
CIL1003S0035	1	1	0	22	27	25	0.06	0.06	0	1.51	1.87	1.71	0.04	1.69667	5.40656	4.01439e-08	1.61319e-07	up
CIL1543S0006	28	27	36	730	1599	831	1.39	1.36	1.77	43.83	97.35	49.81	1.50667	63.6633	5.40103	1.90268e-39	7.23159e-38	up
CIL1372S0027	231	225	138	3889	10786	5933	11.17	10.97	6.58	227.31	639.49	346.05	9.57333	404.283	5.4002	1.86665e-34	5.40659e-33	up
MSTRG.28314	63	64	41	4725	548	538	3.11	3.17	1.98	281.49	33.09	31.96	2.75333	115.513	5.39074	1.71341e-14	1.33227e-13	up
CIL1374S0040	1	3	0	74	13	54	0.09	0.28	0	8.14	1.45	5.93	0.123333	5.17333	5.39046	2.83749e-09	1.30522e-08	up
MSTRG.3845	0	0	1	9	7	18	0	0	0.22	2.43	1.92	4.85	0.0733333	3.06667	5.38606	2.16912e-05	6.03411e-05	up
MSTRG.3144	1	10	4	155	139	225	0.04	0.36	0.14	6.72	6.11	9.74	0.18	7.52333	5.3853	1.40082e-27	2.85103e-26	up
CIL1102S0066	109	67	158	7699	1880	1879	5.5	3.41	7.86	469.6	116.32	114.37	5.59	233.43	5.384	6.73804e-25	1.15694e-23	up
MSTRG.18406	0	2	0	31	10	30	0	0.1	0	1.82	0.59	1.75	0.0333333	1.38667	5.37851	5.22291e-07	1.82244e-06	up
CIL0982S0156	3	2	4	129	87	95	0.09	0.06	0.11	4.43	3.03	3.26	0.0866667	3.57333	5.36565	1.17235e-27	2.39358e-26	up
CIL1226S0053	44	59	38	1152	1724	1840	1.31	1.77	1.11	41.4	62.84	65.98	1.39667	56.74	5.34431	4.52072e-65	5.47729e-63	up
CIL1494S0039	326	280	304	9700	6668	14031	2.48	2.15	2.28	89.37	62.32	128.99	2.30333	93.56	5.3441	2.92503e-108	1.17947e-105	up
CIL1222S0067	3	5	5	356	14	60	0.2	0.33	0.33	28.5	1.14	4.79	0.286667	11.4767	5.32319	5.92408e-09	2.62325e-08	up
CIL1552S0005	0	1	6	140	22	68	0	0.07	0.42	11.93	1.9	5.78	0.163333	6.53667	5.32266	1.30827e-09	6.2477e-09	up
CIL1543S0015	2	1	2	57	17	92	0.05	0.02	0.05	1.65	0.5	2.65	0.04	1.6	5.32193	4.05084e-11	2.28054e-10	up
CIL1405S0077	184	140	192	5687	6222	4889	13.35	10.24	13.74	498.96	553.73	428.03	12.4433	493.573	5.30982	5.49632e-122	2.89476e-119	up
CIL1047S0108	41	30	22	813	1064	1154	2.29	1.69	1.21	54.8	72.75	77.62	1.73	68.39	5.30494	1.37143e-67	1.815e-65	up
CIL1254S0002	68	96	98	3340	2510	2577	3.46	4.92	4.91	205.36	156.55	158.11	4.43	173.34	5.29015	3.96286e-151	3.93344e-148	up
CIL0899S0163	20	18	21	1065	234	603	1.2	1.09	1.24	77.1	17.18	43.56	1.17667	45.9467	5.28718	1.97244e-31	4.84789e-30	up
CIL0948S0158	8	7	14	366	277	270	0.7	0.62	1.21	38.89	29.86	28.63	0.843333	32.46	5.26642	6.25218e-60	6.13498e-58	up
CIL1380S0015	5	6	3	185	73	188	0.13	0.15	0.08	5.72	2.29	5.8	0.12	4.60333	5.26157	4.42808e-26	8.23904e-25	up
CIL1393S0048	26	26	20	1357	407	512	1.26	1.27	0.95	79.43	24.16	29.9	1.16	44.4967	5.2615	4.86885e-35	1.45261e-33	up
CIL1268S0064	2	6	4	331	8	45	0.07	0.2	0.13	13.22	0.32	1.79	0.133333	5.11	5.26021	2.0012e-07	7.3474e-07	up
CIL0194S0001	2	1	1	111	1	11	0.17	0.08	0.08	11.25	0.1	1.11	0.11	4.15333	5.23869	5.74808e-05	0.000150477	up
CIL1095S0036	0	1	0	13	4	13	0	0.09	0	1.46	0.46	1.46	0.03	1.12667	5.23095	6.07793e-05	0.000158437	up
CIL0976S0048	6	3	8	371	75	72	0.34	0.17	0.45	25.75	5.28	4.99	0.32	12.0067	5.22962	1.86246e-14	1.44381e-13	up
MSTRG.1013	0	4	0	119	4	9	0	0.16	0	5.4	0.16	0.44	0.0533333	2	5.22882	0.000188897	0.000456704	up
CIL1282S0011	1	0	3	82	14	30	0.04	0	0.12	3.87	0.69	1.42	0.0533333	1.99333	5.224	1.80049e-08	7.52961e-08	up
CIL1525S0017	0	2	1	27	41	24	0	0.09	0.05	1.53	2.35	1.35	0.0466667	1.74333	5.22331	2.3731e-09	1.10109e-08	up
CIL0990S0075	34	27	16	967	512	894	1.65	1.32	0.76	56.6	30.4	52.22	1.24333	46.4067	5.22205	2.5984e-65	3.17806e-63	up
CIL0101S0001	22	18	23	802	697	431	0.6	0.5	0.62	26.52	23.38	14.22	0.573333	21.3733	5.22029	9.85294e-57	8.28257e-55	up
CIL0914S0132	14	4	7	324	196	242	1.3	0.38	0.64	36.51	22.4	27.21	0.773333	28.7067	5.21415	1.03078e-45	5.33091e-44	up
CIL1144S0076	24	27	21	1231	628	308	2.01	2.27	1.73	126.07	65.18	31.43	2.00333	74.2267	5.21146	8.4477e-30	1.92588e-28	up
MSTRG.10541	7	9	12	286	173	387	0.24	0.31	0.41	11.98	7.35	16.18	0.32	11.8367	5.20905	5.27128e-42	2.27485e-40	up
CIL1087S0031	1	3	3	137	39	41	0.04	0.11	0.1	5.82	1.68	1.74	0.0833333	3.08	5.20789	3.7056e-13	2.55833e-12	up
CIL1552S0004	0	2	0	57	1	3	0	0.2	0	6.88	0.12	0.36	0.0666667	2.45333	5.20163	0.00170463	0.00350752	up
MSTRG.22353	10	17	18	522	459	375	0.5	0.85	0.88	31.45	28.05	22.55	0.743333	27.35	5.20139	1.2056e-64	1.41422e-62	up
CIL1134S0095	22	12	5	529	166	489	1.84	1.01	0.41	53.51	17.03	49.35	1.08667	39.9633	5.2007	3.90996e-24	6.38231e-23	up
CIL0176S0050	1	0	2	36	31	24	0.05	0	0.1	2.15	1.87	1.43	0.05	1.81667	5.18322	5.46966e-10	2.72343e-09	up
MSTRG.21416	102	40	95	2022	2665	2324	1.65	0.66	1.51	39.57	52.92	45.39	1.27333	45.96	5.1737	6.70222e-50	4.14782e-48	up
MSTRG.11975	16	20	22	595	530	525	1.22	1.55	1.01	48.56	44.49	41.94	1.26	44.9967	5.15832	1.14642e-99	3.60801e-97	up
CIL0002S0017	3	6	5	150	79	179	0.13	0.27	0.22	8.12	4.34	9.67	0.206667	7.37667	5.15759	4.29199e-28	8.92532e-27	up
CIL0182S0015	1	0	0	10	17	3	0.19	0	0	2.24	3.87	0.67	0.0633333	2.26	5.15721	0.000156695	0.000383665	up
CIL0798S0001	18	2	8	298	240	282	1.88	0.21	0.82	37.61	30.72	35.51	0.97	34.6133	5.1572	1.00169e-30	2.39579e-29	up
CIL1190S0090	0	0	1	14	11	5	0	0	0.12	1.98	1.58	0.71	0.04	1.42333	5.15313	5.12169e-05	0.000135215	up
MSTRG.19155	145	117	238	5721	3768	5088	2.87	2.33	4.64	136.87	91.44	121.48	3.28	116.597	5.15169	4.32866e-86	9.23222e-84	up
CIL1092S0062	2	0	0	26	12	17	0.09	0	0	1.49	0.7	0.97	0.03	1.05333	5.13386	1.22482e-06	4.0597e-06	up
CIL1452S0001	0	0	2	47	3	5	0	0	0.09	2.7	0.17	0.29	0.03	1.05333	5.13386	0.000465212	0.00105499	up
CIL1032S0138	22	31	25	1022	799	426	1.91	2.72	2.14	107.51	85.26	44.72	2.25667	79.1633	5.13257	1.75308e-43	8.24075e-42	up
CIL1049S0001	7	18	1	463	199	92	0.44	1.14	0.06	35.19	15.34	6.98	0.546667	19.17	5.13205	8.88448e-12	5.33586e-11	up
CIL0987S0170	0	2	0	51	6	0	0	0.05	0	1.56	0.19	0	0.0166667	0.583333	5.12928	0.0045911	0.00872479	up
CIL0935S0024	0	1	7	81	50	97	0	0.11	0.78	10.96	6.85	13.15	0.296667	10.32	5.12046	2.14979e-15	1.83464e-14	up
MSTRG.14469	0	2	2	66	15	33	0	0.12	0.11	4.62	1.07	2.31	0.0766667	2.66667	5.12029	2.81295e-09	1.29516e-08	up
CIL1401S0033	5	2	5	134	146	60	0.44	0.18	0.43	14.29	15.8	6.39	0.35	12.16	5.11864	2.1499e-19	2.5063e-18	up
CIL1225S0035	7	11	14	581	117	212	0.42	0.73	0.9	45.16	9.22	16.45	0.683333	23.61	5.11066	1.06953e-20	1.36506e-19	up
MSTRG.20508	0	0	1	1	10	15	0	0	0.06	0.08	0.8	1.18	0.02	0.686667	5.10154	0.000860046	0.00186452	up
CIL1326S0009	1511	1335	863	20364	50763	32782	40.73	36.29	22.94	663.68	1678.15	1066.11	33.32	1135.98	5.09141	7.26874e-36	2.26005e-34	up
CIL1417S0118	0	1	0	8	4	15	0	0.1	0	1.01	0.51	1.88	0.0333333	1.13333	5.08746	0.000132575	0.000328158	up
MSTRG.15050	363	476	513	16288	9825	11571	14.68	19.41	20.49	797.33	487.86	565.21	18.1933	616.8	5.08332	4.91667e-135	3.52457e-132	up
CIL0992S0079	15	22	22	462	671	509	1.71	2.53	2.48	63.76	93.94	70.1	2.24	75.9333	5.08316	1.29349e-52	9.40311e-51	up
CIL1231S0067	6	0	2	44	55	126	0.26	0	0.09	2.3	2.92	6.58	0.116667	3.93333	5.07529	2.10614e-12	1.33809e-11	up
CIL1034S0079	11	3	4	75	318	100	0.79	0.22	0.28	6.53	28.1	8.69	0.43	14.44	5.06959	3.48887e-13	2.41452e-12	up
CIL0893S0369	0	2	1	17	18	48	0	0.11	0.05	1.1	1.18	3.09	0.0533333	1.79	5.06878	6.13823e-08	2.41074e-07	up
CIL0046S0020	2	1	2	37	55	46	0.14	0.07	0.13	3.04	4.58	3.77	0.113333	3.79667	5.06609	9.54263e-14	6.93513e-13	up
CIL1466S0021	9	18	20	592	233	471	0.4	0.81	0.88	31.79	12.69	25.24	0.696667	23.24	5.06	3.25109e-40	1.2888e-38	up
CIL0962S0108	11	3	0	162	177	39	0.45	0.12	0	8.07	8.94	1.94	0.19	6.31667	5.05509	2.08617e-09	9.74274e-09	up
CIL1134S0085	7	0	1	91	30	97	0.83	0	0.12	13.01	4.35	13.84	0.316667	10.4	5.03747	4.80612e-11	2.67829e-10	up
CIL1312S0032	106	136	78	1704	3968	2906	5.49	7.1	3.98	106.72	252.09	181.62	5.52333	180.143	5.02746	1.13585e-36	3.74367e-35	up
CIL1096S0020	106	105	127	4946	1687	2426	5.78	5.78	6.83	326.31	112.9	159.71	6.13	199.64	5.02537	2.47713e-52	1.76108e-50	up
CIL1462S0003	13	11	2	271	211	215	1.07	0.91	0.16	26.92	21.26	21.32	0.713333	23.1667	5.02133	4.22038e-37	1.40717e-35	up
CIL1199S0016	1	0	0	17	1	8	0.09	0	0	1.91	0.11	0.9	0.03	0.973333	5.0199	0.000987043	0.00211795	up
CIL0957S0157	1	0	0	19	0	9	0.05	0	0	1.09	0	0.52	0.0166667	0.536667	5.00899	0.00393497	0.00757891	up
CIL0171S0002	97	170	194	3618	5582	2961	1.63	2.88	3.22	73.56	115.12	60.07	2.57667	82.9167	5.00808	1.9283e-40	7.76342e-39	up
CIL1138S0069	19	22	47	833	857	622	1.34	1.56	3.26	70.87	73.95	52.8	2.05333	65.8733	5.00365	8.80202e-45	4.31851e-43	up
CIL1528S0034	6	5	8	174	222	91	0.23	0.19	0.3	8.13	10.52	4.24	0.24	7.63	4.99058	2.47649e-23	3.81102e-22	up
CIL1060S0070	2	2	0	35	13	54	0.13	0.13	0	2.83	1.06	4.35	0.0866667	2.74667	4.98606	6.9208e-09	3.04319e-08	up
CIL1152S0041	63	79	72	2186	1893	1479	3.29	4.16	3.71	137.94	121.17	93.13	3.72	117.413	4.98015	4.4232e-101	1.44493e-98	up
CIL0091S0003	248	307	366	4721	13553	5439	12.32	15.38	17.93	283.64	825.95	326.08	15.21	478.557	4.9756	7.6953e-28	1.58494e-26	up
CIL1459S0009	1141	1203	1279	39669	20684	33421	63.71	67.74	70.42	2678.11	1416.45	2251.48	67.29	2115.35	4.97436	2.87667e-154	2.96953e-151	up
CIL1158S0042	1	2	5	120	35	52	0.15	0.3	0.72	21.28	6.3	9.19	0.39	12.2567	4.97395	1.12075e-13	8.08586e-13	up
CIL0952S0001	0	0	1	14	5	6	0	0	0.1	1.73	0.63	0.78	0.0333333	1.04667	4.97269	0.000161201	0.000393839	up
CIL1146S0008	0	4	3	50	40	89	0	0.16	0.12	2.45	1.99	4.35	0.0933333	2.93	4.97236	1.76623e-14	1.37169e-13	up
CIL0925S0029	138	176	193	7305	3471	2202	5.52	7.1	7.61	353.28	170.27	106.26	6.74333	209.937	4.96035	1.31152e-37	4.51887e-36	up
CIL1486S0012	0	4	1	20	80	28	0	0.2	0.05	1.21	4.89	1.68	0.0833333	2.59333	4.95977	6.62779e-08	2.59392e-07	up
CIL1545S0011	3	3	1	16	118	44	0.21	0.21	0.07	1.33	9.97	3.66	0.163333	4.98667	4.93218	5.81207e-09	2.57763e-08	up
MSTRG.21793	4	3	8	139	89	138	0.16	0.14	0.39	8.04	5.32	7.65	0.23	7.00333	4.92834	1.38862e-32	3.61981e-31	up
CIL0177S0012	56	24	56	934	609	1851	2.47	1.07	2.43	49.75	32.9	98.38	1.99	60.3433	4.92235	6.10459e-31	1.4751e-29	up
CIL0970S0098	5	7	18	660	24	60	0.21	0.29	0.74	33.29	1.23	3.02	0.413333	12.5133	4.92002	2.23446e-07	8.1597e-07	up
CIL1128S0061	32	41	33	431	1059	1114	1.17	1.51	1.19	19.04	47.45	49.1	1.29	38.53	4.90054	1.71335e-32	4.44385e-31	up
CIL1025S0120	175	90	126	3143	1993	4387	13.64	7.07	9.68	296.16	190.49	412.5	10.13	299.717	4.88689	6.17247e-57	5.2746e-55	up
CIL1197S0066	100	91	77	1944	1938	2626	4.28	3.93	3.25	100.68	101.81	135.7	3.82	112.73	4.88316	5.36807e-120	2.66411e-117	up
CIL0010S0030	2	2	10	129	107	98	0.09	0.09	0.45	7.13	6.02	5.4	0.21	6.18333	4.87992	3.23258e-24	5.3102e-23	up
CIL1117S0001	1	0	7	26	115	49	0.19	0	1.3	5.92	26.66	11.21	0.496667	14.5967	4.87722	6.33364e-08	2.48219e-07	up
CIL1120S0021	149	127	126	4575	1728	3428	5.01	4.31	4.18	186.04	71.28	139.1	4.5	132.14	4.876	3.49753e-66	4.49059e-64	up
CIL1440S0006	0	1	2	39	9	26	0	0.09	0.17	3.99	0.93	2.65	0.0866667	2.52333	4.86371	2.31265e-07	8.43093e-07	up
MSTRG.17099	0	2	1	8	29	34	0	0.11	0.06	0.55	2.02	2.33	0.0566667	1.63333	4.84918	1.00006e-06	3.35133e-06	up
CIL1581S0001	2	1	1	61	10	13	0.31	0.2	0.2	14.94	2.35	3.06	0.236667	6.78333	4.84107	9.55879e-07	3.21245e-06	up
CIL1264S0024	39	46	17	878	626	898	1.87	2.22	0.8	50.82	36.76	51.87	1.63	46.4833	4.83377	2.17101e-51	1.45904e-49	up
MSTRG.21755	3	8	10	93	218	199	0.28	0.63	0.81	8.93	21.15	18.95	0.573333	16.3433	4.83318	1.09251e-20	1.3937e-19	up
CIL1172S0063	0	0	2	41	0	5	0	0	0.26	6.6	0	0.8	0.0866667	2.46667	4.83094	0.00738394	0.0134774	up
MSTRG.22539	20	41	33	940	926	330	0.52	1.07	0.84	29.4	29.37	10.3	0.81	23.0233	4.82903	3.97803e-26	7.4392e-25	up
CIL1063S0051	0	1	0	15	3	6	0	0.16	0	2.82	0.57	1.13	0.0533333	1.50667	4.82018	0.000399545	0.000916946	up
MSTRG.15051	16	26	37	550	483	797	1.19	1.87	2.63	48.08	42.8	69.45	1.89667	53.4433	4.81647	5.44548e-52	3.74751e-50	up
CIL1381S0021	8	17	10	471	143	203	0.44	0.94	0.54	31.12	9.58	13.39	0.64	18.03	4.81618	1.86241e-24	3.11492e-23	up
CIL0781S0001	151	209	164	3101	5992	2974	8.14	11.37	8.72	202.21	396.33	193.51	9.41	264.017	4.81029	5.31471e-38	1.87373e-36	up
CIL1076S0018	4	9	2	206	12	135	0.14	0.32	0.07	8.68	0.51	5.68	0.176667	4.95667	4.81027	9.27031e-09	4.01812e-08	up
MSTRG.27132	1	1	1	28	15	25	0.06	0.07	0.06	2.18	1.19	1.95	0.0633333	1.77333	4.80735	1.27667e-08	5.43858e-08	up
CIL1050S0061	0	1	1	31	2	14	0	0.16	0.16	5.88	0.39	2.66	0.106667	2.97667	4.80252	0.000136862	0.000337989	up
CIL1378S0016	15	12	24	317	499	349	1.43	1.16	2.26	36.6	58.44	40.21	1.61667	45.0833	4.8015	9.16184e-38	3.19513e-36	up
CIL1018S0117	0	1	1	27	8	10	0	0.08	0.08	2.67	0.8	0.99	0.0533333	1.48667	4.8009	1.57056e-05	4.45351e-05	up
CIL1444S0004	40	35	57	1259	824	913	1.9	1.68	2.68	72.48	48.12	52.45	2.08667	57.6833	4.78888	1.80704e-97	5.4226e-95	up
CIL1020S0072	0	3	1	40	14	38	0	0.44	0.14	6.96	2.47	6.6	0.193333	5.34333	4.78858	4.4668e-09	2.00512e-08	up
MSTRG.21794	0	3	0	44	12	19	0	0.1	0	1.62	0.44	0.69	0.0333333	0.916667	4.78136	7.56481e-07	2.58098e-06	up
CIL1094S0026	7	7	6	134	95	222	0.33	0.33	0.28	7.66	5.51	12.67	0.313333	8.61333	4.7808	2.15511e-28	4.5513e-27	up
CIL0143S0022	50	76	43	1223	894	1711	2.22	3.4	1.88	65.68	48.7	91.7	2.5	68.6933	4.78017	4.00778e-58	3.66769e-56	up
CIL1201S0018	134	73	140	3357	1243	3219	5.27	2.89	5.43	159.5	59.91	152.62	4.53	124.01	4.7748	2.07836e-41	8.76411e-40	up
CIL0902S0131	5	4	1	90	39	96	0.27	0.21	0.05	5.78	2.54	6.16	0.176667	4.82667	4.77193	1.51966e-17	1.53735e-16	up
CIL1519S0002	42	32	53	1027	803	1026	1.11	0.85	1.38	32.68	25.92	32.58	1.11333	30.3933	4.7708	2.10473e-131	1.3248e-128	up
CIL0919S0058	15	19	23	572	441	255	0.84	1.08	1.27	38.78	30.33	17.29	1.06333	28.8	4.7594	2.0018e-38	7.24551e-37	up
CIL0893S0430	1149	1463	2302	25521	56220	26690	55.32	71.03	109.28	1485.51	3319.39	1550.24	78.5433	2118.38	4.75333	1.40752e-29	3.1641e-28	up
MSTRG.23910	9	12	23	505	210	255	0.26	0.35	0.66	17.78	7.5	8.96	0.423333	11.4133	4.75278	7.76518e-31	1.86415e-29	up
CIL1242S0001	83	103	80	2898	447	2554	2.42	3.03	2.3	102.25	15.98	89.95	2.58333	69.3933	4.74749	1.28536e-20	1.63164e-19	up
CIL0909S0052	8	5	25	647	74	114	0.54	0.34	1.68	53.21	6.17	9.36	0.853333	22.9133	4.74693	7.17656e-10	3.53243e-09	up
CIL1448S0019	214	181	213	5159	6260	1818	11.45	9.77	11.24	333.81	410.87	117.38	10.82	287.353	4.73105	2.47098e-28	5.19288e-27	up
CIL0962S0027	16	33	40	1225	227	479	0.46	0.96	1.13	42.6	8.01	16.62	0.85	22.41	4.72054	8.15418e-19	9.09399e-18	up
CIL1154S0077	5	12	14	284	143	245	0.62	1.49	1.7	42.25	21.58	36.37	1.27	33.4	4.71695	1.47467e-37	5.06748e-36	up
MSTRG.28819	0	0	2	20	5	18	0	0	0.14	1.71	0.43	1.54	0.0466667	1.22667	4.71621	3.75146e-05	0.000100942	up
CIL1169S0007	311	468	201	5033	9793	6373	15.77	23.93	10.05	308.56	608.99	389.87	16.5833	435.807	4.71588	2.36101e-31	5.78639e-30	up
CIL1176S0041	62	73	47	1173	1549	1196	2.85	3.39	2.13	65.25	87.4	66.39	2.79	73.0133	4.70982	1.62788e-61	1.69398e-59	up
MSTRG.8041	15	17	34	930	261	266	0.36	0.34	0.57	21.14	5.77	6.21	0.423333	11.04	4.7048	1.61608e-20	2.03246e-19	up
CIL1099S0013	88	110	95	2177	1287	2817	4.17	5.25	4.44	124.65	74.75	160.95	4.62	120.117	4.7004	4.31123e-72	6.66227e-70	up
CIL1405S0014	1	3	0	50	11	26	0.05	0.14	0	2.82	0.63	1.47	0.0633333	1.64	4.69459	1.11786e-07	4.23809e-07	up
CIL1061S0089	10	16	16	438	225	232	0.9	1.45	1.42	47.56	24.78	25.14	1.25667	32.4933	4.69247	2.84296e-41	1.19298e-39	up
CIL0909S0228	39	24	51	619	1347	433	7.35	4.56	9.47	141	311.23	98.42	7.12667	183.55	4.6868	6.2395e-22	8.77987e-21	up
MSTRG.2567	1	1	0	19	6	17	0.08	0.08	0	1.86	0.6	1.66	0.0533333	1.37333	4.6865	1.46682e-05	4.17816e-05	up
CIL0143S0011	1	0	2	26	18	20	0.06	0	0.11	1.77	1.24	1.35	0.0566667	1.45333	4.68072	2.33409e-08	9.63156e-08	up
CIL1235S0061	17	8	12	306	326	145	2.36	1.12	1.65	51.44	55.59	24.32	1.71	43.7833	4.67831	1.3791e-26	2.63829e-25	up
CIL0957S0185	3	2	5	99	27	83	0.28	0.19	0.45	11.04	3.05	9.23	0.306667	7.77333	4.66379	1.68002e-14	1.30749e-13	up
MSTRG.15956	33	21	32	903	153	759	2.14	1.38	2.02	69.8	11.99	58.57	1.84667	46.7867	4.6631	5.10148e-20	6.19548e-19	up
CIL1326S0006	2	2	0	51	19	13	0.11	0.11	0	3.37	1.27	0.86	0.0733333	1.83333	4.64386	1.35567e-07	5.07446e-07	up
MSTRG.28098	1	0	1	25	7	9	0.08	0	0.07	2.28	0.65	0.82	0.05	1.25	4.64386	3.23491e-05	8.77386e-05	up
CIL1110S0027	1	3	3	11	38	94	0.07	0.21	0.21	0.94	3.29	8	0.163333	4.07667	4.6415	3.99845e-08	1.60704e-07	up
CIL0970S0120	7	21	20	300	469	209	0.44	1.33	1.23	22.7	35.99	15.78	1	24.8233	4.63362	2.48696e-22	3.57157e-21	up
CIL0940S0137	0	0	2	22	2	15	0	0	0.11	1.54	0.14	1.05	0.0366667	0.91	4.63333	0.000409127	0.000937602	up
CIL1611S0017	45	71	68	1842	973	946	1.74	2.77	2.59	86.01	46.09	44.08	2.36667	58.7267	4.63309	5.4401e-54	4.14138e-52	up
CIL0667S0001	0	0	1	9	0	11	0	0	0.08	0.89	0	1.08	0.0266667	0.656667	4.62205	0.00844751	0.0152515	up
CIL0329S0005	5	5	0	134	29	41	0.32	0.35	0	10.75	2.36	3.27	0.223333	5.46	4.61163	2.06337e-09	9.64487e-09	up
MSTRG.15490	0	1	0	11	3	7	0	0.14	0	1.79	0.47	1.16	0.0466667	1.14	4.6105	0.000464614	0.00105381	up
CIL1112S0055	17	8	30	930	46	121	0.66	0.31	1.15	43.82	2.2	5.69	0.706667	17.2367	4.60831	5.40219e-08	2.13957e-07	up
MSTRG.21415	1126	1061	1450	22097	24447	26006	30.84	29.3	39.18	731.8	821.22	859.41	33.1067	804.143	4.60226	2.11338e-125	1.212e-122	up
CIL1267S0002	1	0	3	31	13	33	0.06	0	0.18	2.34	0.99	2.49	0.08	1.94	4.59991	1.61762e-08	6.80678e-08	up
CIL1436S0039	5	6	10	152	166	95	0.76	0.92	1.5	27.96	30.97	17.44	1.06	25.4567	4.58591	8.47632e-26	1.54157e-24	up
CIL1061S0051	8	11	28	410	228	278	0.22	0.3	0.75	13.51	7.62	9.14	0.423333	10.09	4.57499	4.49802e-30	1.04015e-28	up
CIL1276S0030	5	3	2	108	54	34	0.66	0.4	0.26	17.26	8.75	5.42	0.44	10.4767	4.57353	5.55638e-14	4.12881e-13	up
CIL1175S0069	70	57	57	1037	1718	834	4.31	3.54	3.46	77.2	129.74	61.96	3.77	89.6333	4.5714	1.12604e-37	3.90588e-36	up
CIL1092S0006	37	30	34	1050	428	500	1.01	0.83	0.92	34.65	14.33	16.46	0.92	21.8133	4.56743	5.37025e-44	2.56174e-42	up
CIL0884S0003	0	1	1	16	9	14	0	0.15	0.14	2.81	1.6	2.45	0.0966667	2.28667	4.56408	9.20309e-06	2.69676e-05	up
CIL1578S0001	3	0	1	49	18	13	0.15	0	0.05	2.89	1.08	0.76	0.0666667	1.57667	4.56377	2.67802e-07	9.67408e-07	up
CIL1154S0076	5	4	9	122	124	103	0.43	0.35	0.76	12.63	13.02	10.64	0.513333	12.0967	4.55857	2.44397e-30	5.73378e-29	up
CIL1343S0026	50	71	52	1518	695	1126	1.9	2.72	1.94	69.61	32.33	51.52	2.18667	51.1533	4.54802	1.67278e-62	1.79127e-60	up
CIL1467S0002	0	2	4	68	40	6	0	0.23	0.45	9.43	5.63	0.83	0.226667	5.29667	4.54644	2.94672e-06	9.27957e-06	up
CIL0967S0202	3	4	9	179	48	77	0.29	0.39	0.86	21.07	5.73	9.05	0.513333	11.95	4.54097	2.72797e-15	2.31125e-14	up
CIL1240S0046	64	57	66	1358	1170	1034	3.31	2.98	3.37	84.99	74.28	64.57	3.22	74.6133	4.5343	2.50263e-118	1.19602e-115	up
CIL0951S0115	3	0	0	49	5	2	0.12	0	0	2.43	0.25	0.1	0.04	0.926667	4.53398	0.00168843	0.00347697	up
CIL1449S0021	0	2	1	40	0	15	0	0.11	0.05	2.69	0	1.01	0.0533333	1.23333	4.53138	0.00201777	0.00410278	up
CIL0893S0111	0	2	0	31	2	5	0	0.04	0	0.75	0.05	0.12	0.0133333	0.306667	4.52356	0.00160675	0.00332281	up
MSTRG.3138	5	5	5	125	16	141	0.25	0.26	0.25	7.69	1	8.65	0.253333	5.78	4.51196	7.21318e-11	3.93803e-10	up
CIL1374S0026	0	0	3	29	8	18	0	0	0.14	1.68	0.47	1.04	0.0466667	1.06333	4.51006	6.36728e-06	1.90826e-05	up
CIL1095S0014	12	22	19	500	125	369	0.3	0.55	0.46	14.99	3.8	11.04	0.436667	9.94333	4.50913	2.31909e-23	3.57733e-22	up
CIL0098S0001	274	308	316	5005	5883	5886	6.7	7.59	7.62	147.97	176.42	173.64	7.30333	166.01	4.50657	4.71937e-119	2.29798e-116	up
CIL0922S0172	5	2	5	124	47	54	0.22	0.09	0.22	6.56	2.52	2.85	0.176667	3.97667	4.49246	2.05262e-16	1.89253e-15	up
CIL0967S0042	9	3	1	87	106	45	0.66	0.22	0.07	7.76	9.59	4.01	0.316667	7.12	4.49084	7.57649e-13	5.06021e-12	up
CIL1137S0030	0	4	2	80	7	23	0	0.19	0.09	4.57	0.41	1.31	0.0933333	2.09667	4.48956	5.91171e-06	1.78166e-05	up
CIL0183S0021	7	6	7	159	32	179	0.24	0.21	0.24	6.66	1.36	7.48	0.23	5.16667	4.48953	1.44611e-14	1.13262e-13	up
MSTRG.3756	58	75	61	729	1986	856	1.19	1.55	1.23	18.02	49.77	21.1	1.32333	29.63	4.48481	3.00271e-24	4.93888e-23	up
CIL0935S0135	97	81	115	2262	1588	1531	8.17	6.88	9.56	230.45	164.11	155.64	8.20333	183.4	4.48264	6.39924e-107	2.42861e-104	up
CIL1210S0034	18	10	16	405	128	273	0.69	0.38	0.6	18.68	5.99	12.57	0.556667	12.4133	4.47893	1.88373e-28	3.99125e-27	up
MSTRG.775	4	3	4	70	23	110	0.13	0.1	0.13	2.76	0.92	4.33	0.12	2.67	4.47573	8.1287e-13	5.40942e-12	up
CIL0996S0051	0	0	1	10	0	7	0	0	0.05	0.65	0	0.46	0.0166667	0.37	4.47249	0.0131792	0.0229065	up
CIL1157S0011	22	30	23	559	256	548	1.35	1.86	1.4	41.62	19.33	40.71	1.53667	33.8867	4.46284	7.60777e-47	4.09882e-45	up
MSTRG.2198	11	6	19	304	138	215	0.28	0.16	0.48	9.35	4.31	6.62	0.306667	6.76	4.46228	1.10136e-30	2.63175e-29	up
CIL0438S0001	25	22	24	869	165	254	1.88	1.67	1.78	79.13	15.24	23.08	1.77667	39.15	4.46177	4.45605e-18	4.7188e-17	up
CIL1197S0061	2276	1929	2248	35590	37117	44170	213.53	182.5	207.97	4036.98	4270.61	4999.52	201.333	4435.7	4.4615	1.4025e-169	2.01079e-166	up
CIL1246S0102	1254	1225	1598	23126	17639	33055	26.91	26.51	33.81	599.93	464.16	855.68	29.0767	639.923	4.45997	3.3709e-89	7.83718e-87	up
MSTRG.8806	15	15	21	563	120	239	0.53	0.53	0.72	23.83	5.15	10.09	0.593333	13.0233	4.45611	2.09279e-20	2.60534e-19	up
CIL0899S0071	3	2	2	113	2	10	0.11	0.08	0.07	5.13	0.09	0.45	0.0866667	1.89	4.44677	9.23009e-05	0.000233759	up
CIL1076S0108	35	33	55	565	1254	373	2.79	2.65	4.32	54.4	122.47	35.84	3.25333	70.9033	4.44586	4.63601e-20	5.65413e-19	up
CIL0976S0038	5	6	8	161	95	83	0.71	0.85	1.11	27.5	16.46	14.15	0.89	19.37	4.44387	3.96218e-26	7.41493e-25	up
CIL0921S0100	1	3	4	103	26	11	0.02	0.06	0.08	2.55	0.65	0.27	0.0533333	1.15667	4.43879	2.60807e-07	9.44786e-07	up
CIL1244S0021	5	1	7	97	90	44	0.28	0.06	0.38	6.5	6.12	2.94	0.24	5.18667	4.4337	3.81998e-15	3.18263e-14	up
CIL1194S0050	10	5	14	363	111	58	0.84	0.44	1.14	35.47	11.06	5.7	0.806667	17.41	4.4318	1.1092e-12	7.26525e-12	up
MSTRG.23306	17	32	22	694	441	123	0.96	1.83	1.23	47.58	30.67	8.41	1.34	28.8867	4.4301	4.2797e-16	3.85367e-15	up
CIL1043S0061	78	157	138	2611	1514	2500	2.47	5.01	4.31	99.89	58.75	95.44	3.93	84.6933	4.42965	4.09995e-54	3.15843e-52	up
CIL1498S0011	0	0	3	25	7	20	0	0	0.38	3.92	1.11	3.13	0.126667	2.72	4.4245	1.04782e-05	3.04413e-05	up
CIL1264S0007	61	56	49	1270	752	907	2.84	2.63	2.25	71.5	42.94	50.95	2.57333	55.13	4.42113	1.0224e-99	3.25741e-97	up
CIL1294S0016	82	60	76	1547	870	1408	5.03	3.71	4.59	114.66	65.41	104.14	4.44333	94.7367	4.41421	1.54355e-98	4.68639e-96	up
CIL1197S0081	0	2	0	17	10	9	0	0.13	0	1.3	0.78	0.69	0.0433333	0.923333	4.4133	3.45041e-05	9.32016e-05	up
CIL1147S0026	33	31	31	1035	243	389	3.08	2.92	2.85	116.77	27.81	43.79	2.95	62.79	4.41175	1.99894e-23	3.09829e-22	up
MSTRG.11263	0	2	1	26	11	17	0	0.12	0.06	1.84	0.79	1.2	0.06	1.27667	4.41128	4.92236e-07	1.72293e-06	up
MSTRG.24397	2	0	4	33	37	34	0.2	0	0.38	3.89	4.42	4	0.193333	4.10333	4.40763	5.22222e-12	3.19966e-11	up
CIL0906S0081	0	0	2	19	9	8	0	0	0.08	0.89	0.43	0.37	0.0266667	0.563333	4.40088	5.44113e-05	0.000143124	up
CIL1371S0107	13	15	31	312	471	235	1.29	1.5	3.02	37.3	57.12	28.04	1.93667	40.82	4.39763	1.21504e-24	2.05752e-23	up
CIL1147S0051	1	1	0	9	4	22	0.14	0.14	0	1.51	0.68	3.69	0.0933333	1.96	4.39232	0.000154366	0.000378249	up
CIL0893S0306	0	2	0	21	11	3	0	0.26	0	3.26	1.73	0.47	0.0866667	1.82	4.39232	0.000418177	0.000956643	up
CIL1001S0055	11	20	19	606	124	132	0.26	0.47	0.43	17.01	3.53	3.7	0.386667	8.08	4.38519	2.63774e-14	2.01397e-13	up
CIL1456S0060	438	562	359	3962	13815	5493	47.8	61.85	38.63	522.78	1849.04	723.25	49.4267	1031.69	4.38358	1.17483e-19	1.39589e-18	up
CIL0984S0019	20	17	25	365	171	526	0.75	0.64	0.93	16.57	7.88	23.83	0.773333	16.0933	4.37923	1.63398e-30	3.85803e-29	up
MSTRG.13140	17	9	11	392	98	141	0.53	0.28	0.34	14.82	3.76	5.32	0.383333	7.96667	4.3773	2.50056e-18	2.70802e-17	up
CIL0940S0175	93	122	149	2656	1353	2212	3.37	4.46	5.33	116.45	60.17	96.78	4.38667	91.1333	4.37678	3.60234e-71	5.43659e-69	up
CIL0156S0013	6	2	3	113	41	32	0.31	0.1	0.15	7.05	2.59	1.99	0.186667	3.87667	4.37628	6.08685e-12	3.70392e-11	up
CIL0158S0002	260	230	272	5470	2640	4912	15.74	14.05	16.24	400.49	196.06	358.87	15.3433	318.473	4.37549	1.03248e-88	2.35797e-86	up
CIL0919S0140	35	50	41	1682	151	326	0.69	0.99	0.79	39.81	3.63	7.7	0.823333	17.0467	4.37187	3.76566e-11	2.12741e-10	up
CIL1551S0004	22	7	30	898	22	77	1.4	0.45	1.88	68.93	1.71	5.9	1.24333	25.5133	4.35897	5.86679e-06	1.76934e-05	up
CIL1401S0016	28	44	73	1194	544	694	1.54	2.44	3.96	79.46	36.72	46.09	2.64667	54.09	4.35311	3.54783e-33	9.52745e-32	up
CIL0945S0098	21	59	47	1803	115	226	0.61	1.77	1.38	64.48	4.17	8.07	1.25333	25.5733	4.3508	3.11898e-08	1.26818e-07	up
MSTRG.23259	4	7	2	105	51	61	0.16	0.29	0.08	5.2	2.56	3.02	0.176667	3.59333	4.34622	1.43113e-18	1.57363e-17	up
CIL0123S0008	97	117	65	2172	782	1732	2.98	3.63	1.97	80.7	29.47	64.22	2.86	58.13	4.3452	5.69257e-37	1.89071e-35	up
CIL1256S0044	99	140	106	1571	2242	1933	3.39	4.83	3.58	64.98	94.05	79.77	3.93333	79.6	4.33894	9.48227e-57	7.99702e-55	up
CIL1502S0054	35	55	49	905	580	830	1.27	2.01	1.75	39.56	25.71	36.2	1.67667	33.8233	4.33435	7.95718e-88	1.77027e-85	up
MSTRG.22235	0	1	0	7	2	7	0	0.09	0	0.79	0.23	0.79	0.03	0.603333	4.32992	0.001886	0.00385398	up
MSTRG.28674	136	126	86	3132	615	2029	6.01	5.62	3.75	167.46	33.35	108.26	5.12667	103.023	4.32881	3.09335e-22	4.42272e-21	up
CIL1463S0031	25	6	31	630	127	266	0.99	0.24	1.21	30.07	6.15	12.67	0.813333	16.2967	4.32459	1.76474e-13	1.25531e-12	up
CIL1025S0132	0	0	0	1	6	2	0	0	0.04	0.09	0.57	0.14	0.0133333	0.266667	4.32193	0.0108393	0.0191766	up
MSTRG.9371	3	0	1	44	9	12	0.2	0	0.07	3.59	0.77	1.02	0.09	1.79333	4.31657	7.60863e-06	2.25386e-05	up
CIL1503S0002	292	226	267	3987	4467	4386	17.76	13.86	16.01	293.19	333.2	321.84	15.8767	316.077	4.31529	1.25759e-117	5.90085e-115	up
CIL0993S0094	430	576	268	11306	2053	7569	14.73	19.89	9.05	468.12	86.22	312.72	14.5567	289.02	4.31142	7.97929e-19	8.90279e-18	up
MSTRG.15673	15	29	42	533	244	627	0.66	1.29	1.82	28.34	13.16	33.26	1.25667	24.92	4.30963	3.19635e-27	6.34524e-26	up
CIL1305S0033	24	40	36	1444	126	68	1.7	2.85	2.51	123.22	10.91	5.79	2.35333	46.64	4.30879	2.56488e-07	9.29921e-07	up
CIL1312S0053	10	18	8	521	38	26	0.57	1.03	0.45	35.81	2.65	1.78	0.683333	13.4133	4.29493	1.70627e-06	5.55561e-06	up
CIL0191S0002	15	11	18	211	318	174	0.41	0.3	0.48	6.97	10.65	5.73	0.396667	7.78333	4.29439	2.34708e-28	4.94055e-27	up
CIL0917S0092	0	0	1	4	10	2	0	0	0.09	0.44	1.1	0.22	0.03	0.586667	4.28951	0.00272301	0.00540642	up
MSTRG.18924	118	283	225	6565	1151	2382	8.07	19.51	15.17	542.58	96.49	196.44	14.25	278.503	4.28866	2.50607e-16	2.2926e-15	up
CIL1216S0047	32	30	26	754	97	561	1.73	1.64	1.39	49.4	6.45	36.67	1.58667	30.84	4.28073	3.82059e-15	3.18263e-14	up
CIL0935S0032	16	7	33	592	117	185	1.1	0.49	2.24	49.22	9.87	15.35	1.27667	24.8133	4.28066	1.87407e-12	1.19802e-11	up
CIL0945S0053	1	0	0	8	7	1	0.17	0	0	1.64	1.45	0.2	0.0566667	1.09667	4.27448	0.00365791	0.00709132	up
CIL1310S0018	5	5	13	278	22	63	0.17	0.17	0.43	11.39	0.91	2.58	0.256667	4.96	4.27237	3.27559e-08	1.32768e-07	up
CIL1219S0042	30	5	9	196	318	183	2.5	0.42	0.74	19.75	32.51	18.4	1.22	23.5533	4.27098	7.94473e-15	6.41519e-14	up
CIL1258S0024	87	97	108	1198	2026	1398	7.14	8.03	8.74	118.88	203.93	138.43	7.97	153.747	4.26983	4.09953e-45	2.04636e-43	up
CIL1105S0009	17	15	19	205	256	346	0.82	0.73	0.9	11.93	15.11	20.1	0.816667	15.7133	4.2661	2.7982e-41	1.17611e-39	up
CIL1030S0116	21	64	82	2358	50	236	0.7	2.16	2.71	95.52	2.05	9.54	1.85667	35.7033	4.26527	0.000390729	0.000898231	up
MSTRG.3141	8	3	10	127	29	173	0.37	0.15	0.5	7.49	1.74	10.22	0.34	6.48333	4.25313	6.25696e-12	3.80206e-11	up
CIL1037S0106	4	12	9	178	70	144	0.18	0.56	0.41	9.91	3.95	8	0.383333	7.28667	4.24859	3.18755e-22	4.55487e-21	up
CIL0989S0050	212	306	124	5247	583	4220	9.61	13.99	5.54	287.69	32.43	230.88	9.71333	183.667	4.24098	1.18303e-12	7.72726e-12	up
MSTRG.946	59	70	85	1395	1121	801	2.4	2.85	3.41	68.56	55.88	39.29	2.88667	54.5767	4.24081	1.82068e-57	1.60912e-55	up
CIL1003S0064	1	1	1	27	0	16	0.04	0.04	0.04	1.42	0	0.84	0.04	0.753333	4.23522	0.00141444	0.00295662	up
CIL1066S0084	0	1	2	19	2	25	0	0.07	0.13	1.55	0.17	2.02	0.0666667	1.24667	4.22497	0.00016525	0.000402929	up
MSTRG.15957	5	1	0	19	22	39	0.65	0.09	0	3.3	3.84	6.64	0.246667	4.59333	4.21891	9.82382e-08	3.75423e-07	up
CIL0942S0073	8	5	15	268	79	81	0.24	0.15	0.44	9.64	2.88	2.91	0.276667	5.14333	4.21648	1.40932e-14	1.10649e-13	up
MSTRG.6787	8	14	5	169	102	135	0.23	0.4	0.14	5.92	3.64	4.73	0.256667	4.76333	4.214	9.69713e-32	2.41558e-30	up
CIL0001S0013	117	144	123	2312	994	2571	3.19	3.96	3.31	76.18	33.22	84.53	3.48667	64.6433	4.21258	8.69239e-46	4.51357e-44	up
CIL1578S0020	159	183	178	2537	2827	2545	5.55	6.44	6.13	107.1	121.06	107.21	6.04	111.79	4.2101	7.39599e-105	2.65095e-102	up
CIL1061S0091	537	451	506	7337	3672	11721	29.05	24.6	26.99	479.91	243.63	765.03	26.88	496.19	4.20629	1.52735e-37	5.22763e-36	up
CIL0942S0017	11	13	9	301	59	140	0.58	0.69	0.47	19.25	3.83	8.94	0.58	10.6733	4.20181	4.48421e-16	4.03501e-15	up
CIL1383S0019	398	505	520	9385	6122	6030	13	16.63	16.74	370.51	245.16	237.55	15.4567	284.407	4.20165	3.07141e-95	8.52301e-93	up
MSTRG.11249	54	20	28	547	121	874	1.05	0.4	0.54	12.93	2.89	20.61	0.663333	12.1433	4.19429	2.86019e-13	1.99602e-12	up
MSTRG.13976	75	109	116	1213	1491	1792	3.8	5.55	5.78	74.08	92.37	109.25	5.04333	91.9	4.18762	1.22296e-58	1.14767e-56	up
CIL0987S0132	453	476	438	8707	6980	4718	8.71	9.23	8.3	202.39	164.57	109.43	8.74667	158.797	4.1823	1.2898e-65	1.59262e-63	up
CIL1537S0015	81	99	79	2059	391	1426	4.11	5.06	3.95	126.23	24.31	87.24	4.37333	79.26	4.17979	5.27252e-21	6.91402e-20	up
CIL1294S0067	538	429	444	10063	3757	7219	26.41	21.24	21.49	597.32	226.21	427.59	23.0467	417.04	4.17756	5.0243e-52	3.48554e-50	up
CIL0049S0003	22	26	30	494	254	407	1.45	1.73	1.95	39.43	20.57	32.42	1.71	30.8067	4.17117	3.39126e-57	2.9567e-55	up
CIL1298S0046	7	1	3	152	0	8	0.31	0.04	0.13	8.19	0	0.43	0.16	2.87333	4.16658	0.00284055	0.00562249	up
CIL0090S0036	14	8	10	251	112	111	0.63	0.37	0.45	13.74	6.22	6.07	0.483333	8.67667	4.16605	1.33435e-24	2.25363e-23	up
CIL1084S0048	0	1	3	27	9	25	0	0.05	0.14	1.5	0.51	1.38	0.0633333	1.13	4.15721	5.64356e-07	1.95968e-06	up
CIL1477S0014	6	2	3	40	39	81	0.24	0.08	0.12	1.96	1.94	3.95	0.146667	2.61667	4.15712	6.14922e-14	4.5536e-13	up
CIL1324S0001	9	2	9	202	34	57	0.62	0.14	0.61	16.74	2.86	4.71	0.456667	8.10333	4.1493	8.96216e-10	4.3565e-09	up
CIL1034S0088	3	0	0	26	3	15	0.3	0	0	3.16	0.37	1.78	0.1	1.77	4.14568	0.000369602	0.000853465	up
CIL1182S0022	99	97	102	1580	1323	1421	4.1	4.05	4.17	79.14	67.21	71.03	4.10667	72.46	4.14115	9.18026e-194	2.63239e-190	up
CIL1198S0014	1	0	0	10	3	3	0.05	0	0	0.55	0.17	0.16	0.0166667	0.293333	4.1375	0.00233075	0.00468673	up
CIL0168S0012	723	634	720	4096	16912	8927	60.19	53.23	59.11	412.31	1726.81	896.68	57.51	1011.93	4.13716	1.00628e-18	1.11781e-17	up
CIL1210S0024	245	234	144	3977	839	4232	9.8	9.44	5.68	192.33	41.16	204.23	8.30667	145.907	4.13463	1.36901e-18	1.5079e-17	up
CIL0925S0106	36	11	35	1025	23	137	1.43	0.44	1.37	49.17	1.12	6.56	1.08	18.95	4.13309	5.75005e-06	1.73577e-05	up
CIL1032S0134	3	4	8	59	82	79	0.29	0.4	0.74	6.64	9.48	8.94	0.476667	8.35333	4.1313	1.69762e-19	1.99411e-18	up
CIL1579S0009	39	37	44	1138	154	441	1.91	1.83	2.13	67.45	9.26	26.08	1.95667	34.2633	4.1302	4.96209e-15	4.09258e-14	up
CIL1009S0101	57	54	79	989	970	771	2.18	2.08	2.98	45.67	45.44	35.53	2.41333	42.2133	4.1286	1.98929e-68	2.74533e-66	up
CIL0922S0228	985	1105	985	19738	9943	14415	30.31	34.29	29.89	734.4	375.26	535.2	31.4967	548.287	4.12166	1.18523e-95	3.43675e-93	up
MSTRG.20596	9	3	3	195	3	18	0.69	0.24	0.23	18.12	0.28	1.65	0.386667	6.68333	4.11141	0.000122236	0.000303877	up
CIL0010S0048	3	22	16	474	69	41	0.17	1.23	0.88	31.8	4.69	2.74	0.76	13.0767	4.10485	9.26734e-07	3.12019e-06	up
CIL1482S0043	0	0	4	13	29	13	0	0	0.16	0.65	1.46	0.64	0.0533333	0.916667	4.10329	2.73093e-05	7.48881e-05	up
CIL1371S0029	1	6	0	52	21	26	0.08	0.47	0	4.92	2.01	2.45	0.183333	3.12667	4.09208	9.00674e-08	3.4594e-07	up
MSTRG.27255	69	74	114	1096	721	1779	2.26	2.44	3.68	43.35	28.93	70.22	2.79333	47.5	4.08787	4.82531e-37	1.60473e-35	up
CIL1325S0071	5	9	7	228	21	44	0.44	0.81	0.61	24.51	2.29	4.72	0.62	10.5067	4.08289	4.69639e-08	1.87297e-07	up
CIL1087S0081	18	18	15	371	84	259	0.54	0.54	0.44	13.37	3.07	9.31	0.506667	8.58333	4.08243	1.14646e-19	1.36344e-18	up
CIL1568S0019	0	1	1	13	4	11	0	0.18	0.17	2.74	0.85	2.31	0.116667	1.96667	4.07529	0.000205433	0.000493585	up
CIL1444S0032	1965	3103	2125	30146	40984	28518	96	152.87	102.37	1780.62	2455.53	1680.87	117.08	1972.34	4.07434	2.47335e-44	1.19308e-42	up
CIL0923S0103	2	1	1	41	5	7	0.09	0.04	0.04	2.21	0.27	0.38	0.0566667	0.953333	4.07241	8.01377e-05	0.000205068	up
CIL1493S0026	718	765	822	13454	6262	12210	16.46	17.68	18.58	372.84	176.03	337.65	17.5733	295.507	4.07173	1.15044e-73	1.82143e-71	up
CIL0046S0004	419	303	574	2468	9094	6259	24.09	17.57	32.55	171.58	641.3	434.21	24.7367	415.697	4.07081	1.43909e-18	1.58171e-17	up
CIL0282S0004	14	13	32	688	67	58	0.28	0.25	0.62	16.34	1.61	1.37	0.383333	6.44	4.07039	2.64162e-07	9.56001e-07	up
CIL1594S0024	2	4	1	20	53	24	0.2	0.4	0.1	2.4	6.46	2.88	0.233333	3.91333	4.06793	1.78018e-08	7.45072e-08	up
CIL0984S0078	16	13	11	168	247	132	0.39	0.32	0.26	4.95	7.38	3.88	0.323333	5.40333	4.06276	3.5528e-25	6.19926e-24	up
CIL0218S0028	31	32	21	602	227	330	1.95	2.03	1.3	45.71	17.48	25	1.76	29.3967	4.06201	3.93021e-32	1.00323e-30	up
CIL0390S0001	14	6	13	335	42	74	0.71	0.31	0.65	20.67	2.63	4.56	0.556667	9.28667	4.06028	1.18893e-09	5.70417e-09	up
CIL1164S0087	13	9	15	410	31	63	0.49	0.34	0.55	18.54	1.42	2.84	0.46	7.6	4.04629	6.29999e-08	2.4705e-07	up
CIL1021S0064	4	13	13	250	29	130	0.26	0.87	0.85	19.97	2.35	10.36	0.66	10.8933	4.04484	8.7274e-10	4.25039e-09	up
CIL1367S0016	1	1	0	11	11	5	0.1	0.1	0	1.33	1.35	0.6	0.0666667	1.09333	4.03562	0.000202257	0.000486453	up
MSTRG.13315	5	25	36	825	16	51	0.35	1.76	2.48	69.55	1.37	4.29	1.53	25.07	4.03436	0.00227091	0.00457532	up
CIL0987S0144	3	2	2	77	8	10	0.2	0.14	0.13	6.2	0.66	0.81	0.156667	2.55667	4.02849	1.13271e-05	3.27858e-05	up
CIL1038S0047	113	84	78	585	2214	877	8.8	6.59	5.99	55.06	211.38	82.37	7.12667	116.27	4.02811	2.15135e-16	1.98002e-15	up
CIL1519S0010	4	2	4	63	23	49	0.25	0.13	0.25	4.77	1.77	3.7	0.21	3.41333	4.02272	2.9806e-13	2.07444e-12	up
CIL1405S0044	1	2	4	64	17	12	0.04	0.07	0.14	2.79	0.75	0.52	0.0833333	1.35333	4.02148	6.5151e-07	2.2463e-06	up
CIL1320S0039	5	9	9	111	135	60	0.17	0.3	0.3	4.5	5.56	2.43	0.256667	4.16333	4.01977	9.9652e-18	1.025e-16	up
CIL1317S0076	974	1016	1158	30775	5368	5849	30.99	32.6	36.33	1183.84	209.46	224.52	33.3067	539.273	4.01713	8.53187e-14	6.23569e-13	up
CIL1225S0038	166	233	487	7911	1074	2797	10.28	14.52	29.73	592.11	81.54	208.9	18.1767	294.183	4.01656	4.23021e-12	2.61232e-11	up
CIL0993S0093	203	230	214	3441	1960	3216	5.79	6.61	6.01	118.58	68.51	110.59	6.13667	99.2267	4.0152	7.93382e-108	3.14997e-105	up
CIL1378S0030	1	6	3	43	19	71	0.04	0.23	0.11	1.98	0.89	3.26	0.126667	2.04333	4.01182	9.31263e-10	4.52175e-09	up
CIL1203S0005	3	3	3	110	1	8	0.26	0.26	0.25	11.46	0.11	0.83	0.256667	4.13333	4.00934	0.000560499	0.00125508	up
CIL1012S0017	0	7	4	74	14	55	0	0.45	0.27	6	1.13	4.46	0.24	3.86333	4.00874	3.60888e-07	1.28284e-06	up
CIL1383S0021	99	50	58	746	914	1071	4.5	2.29	2.6	41.04	51	58.79	3.13	50.2767	4.00565	3.59498e-42	1.57247e-40	up
CIL1229S0073	7	9	2	116	24	99	0.26	0.33	0.07	5.14	1.08	4.37	0.22	3.53	4.00409	1.09502e-10	5.86047e-10	up
CIL0262S0006	3	1	2	52	14	12	0.21	0.07	0.14	4.48	1.22	1.03	0.14	2.24333	4.00215	6.52673e-07	2.2494e-06	up
CIL1290S0041	15	17	30	434	61	326	0.25	0.29	0.5	8.8	1.26	6.6	0.346667	5.55333	4.00173	9.10756e-13	6.02664e-12	up
CIL1371S0101	52	83	148	1094	1491	1124	3.04	4.89	8.52	77.21	106.73	79.15	5.48333	87.6967	3.9994	5.76798e-27	1.13111e-25	up
MSTRG.26110	0	2	0	14	7	6	0	0.13	0	1.07	0.54	0.46	0.0433333	0.69	3.99305	0.000349752	0.000810893	up
MSTRG.7926	46	58	60	1069	400	679	1.54	1.96	1.99	43.37	16.46	27.49	1.83	29.1067	3.99143	1.60383e-39	6.15925e-38	up
MSTRG.481	11	6	9	110	30	197	0.83	0.46	0.66	10.09	2.8	18.04	0.65	10.31	3.98746	1.17379e-11	6.96688e-11	up
MSTRG.6489	281	283	284	4660	2988	3420	11.12	11.29	11.08	222.93	144.99	163.26	11.1633	177.06	3.9874	4.12542e-155	4.43603e-152	up
CIL1236S0047	271	255	280	2889	2355	5184	11.11	10.55	11.32	143.26	118.46	256.52	10.9933	172.747	3.97396	1.99963e-49	1.21137e-47	up
CIL0310S0017	32	26	70	537	795	300	2.72	2.23	5.86	55.11	82.76	30.72	3.60333	56.1967	3.96308	1.20065e-17	1.22616e-16	up
CIL1162S0008	1	5	0	24	40	14	0.04	0.18	0	1.05	1.77	0.61	0.0733333	1.14333	3.96263	2.22393e-06	7.12335e-06	up
MSTRG.14367	248	258	266	3719	2545	3729	9.61	10.08	10.21	172.31	120.4	173.01	9.96667	155.24	3.96125	5.72787e-190	1.34381e-186	up
CIL1134S0015	1075	810	649	7484	13746	10975	51.47	39.11	30.64	433.22	807.13	633.95	40.4067	624.767	3.95065	1.05078e-34	3.06759e-33	up
MSTRG.10809	0	3	5	48	10	6	0	0.15	0.24	4.55	0.61	0.85	0.13	2.00333	3.94582	0.000574742	0.0012843	up
CIL0117S0001	96	103	91	1498	896	1281	2.29	2.48	2.15	43.3	26.27	36.95	2.30667	35.5067	3.94421	3.30418e-112	1.42118e-109	up
CIL0929S0182	11	8	8	168	75	99	1.67	1.22	1.19	30.76	13.93	18.09	1.36	20.9267	3.94366	4.31203e-25	7.48357e-24	up
CIL1468S0015	48	20	46	356	781	292	4.26	1.79	4.02	38.17	84.93	31.24	3.35667	51.4467	3.93798	9.15598e-17	8.6616e-16	up
CIL1143S0086	541	406	434	5457	4620	7321	25.96	19.64	20.53	316.54	271.84	423.76	22.0433	337.38	3.93596	4.73516e-93	1.2598e-90	up
CIL0090S0033	372	398	462	3652	7563	4226	13.6	14.67	16.65	161.39	339.01	186.35	14.9733	228.917	3.93436	3.02983e-30	7.09536e-29	up
CIL1047S0106	21	47	34	500	427	354	0.65	1.47	1.04	18.71	16.21	13.22	1.05333	16.0467	3.92924	4.647e-38	1.64732e-36	up
CIL0149S0008	1	0	7	80	1	18	0.05	0	0.36	5.05	0.06	1.13	0.136667	2.08	3.92785	0.00230075	0.00463111	up
MSTRG.6277	8	18	17	272	158	106	1.02	2.31	2.13	41.87	24.67	16.28	1.82	27.6067	3.92301	1.33323e-20	1.68909e-19	up
CIL1083S0027	2	2	2	43	5	25	0.06	0.06	0.06	1.61	0.19	0.93	0.06	0.91	3.92283	2.55373e-06	8.10529e-06	up
CIL1090S0061	68	73	70	689	700	1244	2.34	2.54	2.38	28.73	29.6	51.75	2.42	36.6933	3.92244	1.10282e-48	6.40999e-47	up
CIL1155S0063	5	5	7	33	144	32	0.63	0.63	0.87	5.02	22.24	4.86	0.71	10.7067	3.91455	1.11143e-08	4.77247e-08	up
CIL0616S0001	69	98	111	921	1239	1268	3.96	5.65	6.28	63.69	86.85	87.47	5.29667	79.3367	3.90483	3.55653e-48	2.01722e-46	up
CIL0577S0001	1	1	2	20	10	19	0.18	0.19	0.36	4.45	2.26	4.22	0.243333	3.64333	3.90425	4.1438e-07	1.46252e-06	up
CIL0899S0172	19	13	61	879	85	176	0.55	0.38	1.74	30.69	3.01	6.13	0.89	13.2767	3.89894	1.47242e-07	5.49115e-07	up
CIL1001S0104	1	0	3	39	1	11	0.03	0	0.08	1.26	0.03	0.35	0.0366667	0.546667	3.89812	0.00129866	0.00273142	up
CIL1167S0072	56	56	44	499	577	837	1.94	1.96	1.5	20.92	24.54	35.01	1.8	26.8233	3.89742	8.36029e-49	4.88131e-47	up
CIL1021S0088	42	37	28	740	194	384	2.05	1.82	1.35	43.59	11.59	22.57	1.74	25.9167	3.89672	1.98835e-22	2.88277e-21	up
CIL1155S0056	66	74	65	980	429	1110	1.34	1.52	1.3	24.06	10.68	27.19	1.38667	20.6433	3.89598	4.15306e-39	1.55505e-37	up
CIL1063S0052	24	26	8	329	119	263	1.4	1.53	0.46	23.22	8.52	18.52	1.13	16.7533	3.89005	7.15282e-19	8.02927e-18	up
CIL0976S0152	7	11	5	104	34	143	0.24	0.38	0.17	4.33	1.44	5.94	0.263333	3.90333	3.88974	2.43708e-13	1.71326e-12	up
CIL1142S0021	7	6	7	127	65	50	0.43	0.37	0.43	9.46	4.91	3.72	0.41	6.03	3.87846	1.97852e-17	1.9829e-16	up
CIL1463S0018	200	470	282	2681	6871	1892	9.38	22.23	13.04	152.05	395.28	107.08	14.8833	218.137	3.87346	6.38188e-14	4.72182e-13	up
CIL0945S0091	14	15	22	271	65	279	0.64	0.69	1	15.03	3.66	15.45	0.776667	11.38	3.87306	3.33557e-16	3.01933e-15	up
CIL1201S0032	16	12	31	31	591	80	1.18	0.9	2.26	2.77	53.66	7.15	1.44667	21.1933	3.87281	3.08857e-06	9.70022e-06	up
CIL0310S0015	14	21	29	315	318	134	1.33	2.01	2.72	36.17	37.04	15.35	2.02	29.52	3.86927	3.95921e-20	4.84703e-19	up
CIL1002S0048	47	59	44	977	141	688	1.26	1.6	1.16	31.69	4.64	22.27	1.34	19.5333	3.86563	2.46587e-14	1.88833e-13	up
CIL1184S0048	16	23	21	349	189	177	0.55	0.8	0.71	14.55	7.99	7.36	0.686667	9.96667	3.85943	4.30657e-33	1.1541e-31	up
CIL1470S0015	0	1	4	56	0	3	0	0.13	0.51	8.8	0	0.47	0.213333	3.09	3.85643	0.0157428	0.0268842	up
CIL1229S0071	7	14	17	127	106	218	0.32	0.64	0.76	6.98	5.91	11.96	0.573333	8.28333	3.85277	4.27391e-23	6.47662e-22	up
MSTRG.11390	0	0	1	4	6	2	0	0	0.18	0.86	1.31	0.43	0.06	0.866667	3.85244	0.00575275	0.0107324	up
CIL0212S0004	78	29	39	1152	322	261	5.52	2.07	2.72	98.6	27.96	22.29	3.43667	49.6167	3.85174	3.93876e-13	2.7106e-12	up
CIL1040S0065	37	31	41	345	317	625	3.02	2.55	3.29	34	31.68	61.45	2.95333	42.3767	3.84285	5.13211e-38	1.81431e-36	up
CIL1266S0038	257	285	242	4246	1035	3975	6.05	6.76	5.61	120.77	29.86	112.82	6.14	87.8167	3.83818	2.44694e-22	3.518e-21	up
CIL1339S0031	1	0	0	4	2	6	0.12	0	0	0.57	0.29	0.85	0.04	0.57	3.83289	0.00574777	0.0107247	up
CIL0260S0023	3	2	8	113	9	29	0.25	0.17	0.66	11.47	0.93	2.94	0.36	5.11333	3.8282	4.37134e-06	1.33996e-05	up
CIL0929S0199	78	73	64	1432	218	858	3.21	3.03	2.6	71.35	11.02	42.66	2.94667	41.6767	3.82208	1.82663e-15	1.56767e-14	up
MSTRG.25373	0	1	5	27	3	39	0	0.09	0.45	2.98	0.34	4.29	0.18	2.53667	3.81687	0.000253403	0.000600456	up
CIL0324S0018	1251	1404	1436	27692	5508	14268	56.73	64.2	64.21	1518.3	306.33	780.62	61.7133	868.417	3.81473	2.19989e-20	2.73734e-19	up
CIL1173S0085	355	290	391	2263	4958	4717	22.77	18.75	24.73	175.47	389.95	364.97	22.0833	310.13	3.81184	1.92787e-29	4.30014e-28	up
CIL1587S0002	184	231	286	2673	2931	2476	9.19	11.61	14.04	161.06	179.12	148.88	11.6133	163.02	3.81119	2.77469e-63	3.05388e-61	up
CIL0978S0020	567	667	598	4167	8723	8142	17.67	20.97	18.38	157.06	333.51	306.24	19.0067	265.603	3.8047	8.78114e-32	2.19163e-30	up
CIL1025S0047	364	507	461	5558	4350	5401	17.05	23.95	21.3	314.8	249.91	305.25	20.7667	289.987	3.80365	2.81423e-117	1.29691e-114	up
CIL1235S0016	144	181	188	1794	2328	1752	8.48	10.74	10.91	127.68	168.06	124.42	10.0433	140.053	3.80167	8.64836e-54	6.50695e-52	up
CIL0957S0069	3	11	1	105	30	36	0.13	0.48	0.04	5.55	1.61	1.9	0.216667	3.02	3.801	1.12722e-07	4.26981e-07	up
MSTRG.658	5	5	7	111	27	56	0.32	0.32	0.44	8.6	2.12	4.33	0.36	5.01667	3.80066	1.7885e-12	1.14587e-11	up
CIL0902S0111	2	15	4	174	17	51	0.08	0.62	0.16	8.61	0.85	2.52	0.286667	3.99333	3.80015	3.80488e-06	1.17709e-05	up
CIL1294S0066	1	1	7	51	11	41	0.16	0.16	1.08	9.65	2.11	7.74	0.466667	6.5	3.79998	7.15985e-07	2.45124e-06	up
CIL1446S0069	82	91	90	889	1058	1061	3.95	4.42	4.28	51.78	62.51	61.67	4.21667	58.6533	3.79804	6.98846e-75	1.14146e-72	up
CIL1145S0057	17	15	23	222	235	171	0.99	0.88	1.32	15.59	16.74	11.98	1.06333	14.77	3.796	1.41974e-36	4.62034e-35	up
CIL1131S0098	2	3	2	64	4	12	0.34	0.51	0.33	13.09	0.83	2.45	0.393333	5.45667	3.7942	5.8431e-05	0.000152779	up
CIL0247S0009	26	28	41	833	117	134	0.81	0.88	1.26	31.36	4.47	5.04	0.983333	13.6233	3.79226	1.13577e-09	5.45828e-09	up
CIL1420S0011	1567	1677	1587	20041	14687	20368	53.8	58.06	53.72	831.84	618.36	843.61	55.1933	764.603	3.79215	9.43321e-243	4.05738e-239	up
CIL1021S0096	15	9	22	365	52	105	0.46	0.28	0.66	13.5	1.95	3.88	0.466667	6.44333	3.78734	3.38899e-10	1.72743e-09	up
CIL1573S0016	5	5	7	30	119	44	0.24	0.25	0.34	1.77	7.1	2.58	0.276667	3.81667	3.78609	1.14991e-09	5.52314e-09	up
MSTRG.10543	5	6	5	63	48	72	0.34	0.41	0.33	5.11	3.95	5.82	0.36	4.96	3.78427	1.88235e-21	2.55673e-20	up
MSTRG.20326	1	0	3	10	21	14	0.09	0	0.26	1.06	2.27	1.49	0.116667	1.60667	3.78361	8.97837e-06	2.63601e-05	up
MSTRG.21756	219	250	327	2059	4064	2853	10.11	11.67	14.9	115.12	230.55	159.22	12.2267	168.297	3.7829	1.53663e-30	3.63816e-29	up
CIL0893S0153	205	195	416	1797	5977	1367	11.66	11.19	23.34	123.6	417.01	93.82	15.3967	211.477	3.77981	8.6302e-12	5.19039e-11	up
CIL1196S0103	51	37	34	583	354	439	1.67	1.23	1.1	23.15	14.26	17.39	1.33333	18.2667	3.7761	8.51536e-64	9.5546e-62	up
CIL0098S0020	38	29	33	503	305	318	1.42	1.09	1.22	22.73	13.98	14.34	1.24333	17.0167	3.77466	8.94832e-55	7.17172e-53	up
CIL1266S0014	9	8	5	119	36	92	0.47	0.42	0.26	7.54	2.31	5.81	0.383333	5.22	3.76738	1.40371e-15	1.2144e-14	up
CIL0047S0010	3	10	2	139	14	20	0.28	0.82	0.16	13.66	1.45	2.01	0.42	5.70667	3.76419	1.32734e-05	3.80226e-05	up
CIL1178S0045	285	285	220	2961	2616	3250	16.96	17.11	12.91	213.08	190.95	233.38	15.66	212.47	3.7621	5.5211e-117	2.4997e-114	up
CIL0112S0013	413	488	398	5855	1070	7613	27.9	33.25	26.51	478.25	88.66	620.52	29.22	395.81	3.75978	4.67149e-14	3.49644e-13	up
CIL1406S0019	55	38	45	336	963	227	3.72	2.59	3	27.5	79.94	18.54	3.10333	41.9933	3.75827	4.60113e-13	3.14048e-12	up
CIL1359S0032	281	214	324	1139	5377	2532	15.27	11.73	17.37	74.85	358.43	166.04	14.79	199.773	3.75567	5.32486e-14	3.96619e-13	up
CIL1224S0010	2	0	0	15	6	1	0.1	0	0	0.92	0.37	0.06	0.0333333	0.45	3.75489	0.00714377	0.0130696	up
CIL1064S0026	4	5	3	47	50	33	0.11	0.14	0.08	1.6	1.73	1.12	0.11	1.48333	3.75327	3.3468e-14	2.53659e-13	up
CIL0976S0103	6	5	9	61	103	54	1.12	0.94	1.66	13.78	23.61	12.18	1.24	16.5233	3.73609	3.51463e-15	2.93914e-14	up
CIL1348S0036	139	168	128	2099	1062	1612	3.27	3.98	2.97	59.62	30.6	45.69	3.40667	45.3033	3.73318	3.07395e-64	3.47936e-62	up
CIL0893S0283	1	0	0	8	2	1	0.16	0	0	1.54	0.39	0.19	0.0533333	0.706667	3.72792	0.017468	0.0295546	up
CIL0893S0152	71	76	116	1114	1038	694	4.88	5.26	7.86	92.52	87.45	57.52	6	79.1633	3.7218	4.22554e-40	1.66741e-38	up
CIL0979S0123	3	9	2	137	4	12	0.24	0.72	0.16	13.21	0.39	1.15	0.373333	4.91667	3.71914	0.000384244	0.000884347	up
MSTRG.12720	140	214	194	2400	1559	1977	5.54	8.54	7.57	114.88	75.69	94.43	7.21667	95	3.71852	1.74449e-76	3.06259e-74	up
MSTRG.6276	21	27	26	430	208	162	3.74	4.85	4.57	92.67	45.47	34.84	4.38667	57.66	3.71637	2.89273e-24	4.77013e-23	up
CIL0937S0161	2	0	1	22	4	8	0.06	0	0.03	0.76	0.14	0.28	0.03	0.393333	3.71272	0.000266405	0.000629072	up
MSTRG.10679	0	3	1	42	1	0	0	0.15	0.05	2.56	0.06	0	0.0666667	0.873333	3.71149	0.028539	0.0461672	up
CIL0170S0013	418	426	469	4760	4540	4813	7.92	8.14	8.76	109.04	105.5	110.02	8.27333	108.187	3.70891	1.79178e-172	2.72003e-169	up
MSTRG.21020	0	1	3	24	8	12	0	0.07	0.2	1.92	0.65	0.96	0.09	1.17667	3.70864	1.53882e-05	4.36977e-05	up
CIL1047S0037	131	165	135	1431	1883	1319	2.3	2.92	2.34	30.36	40.52	27.92	2.52	32.9333	3.70805	1.3099e-46	6.98442e-45	up
CIL1405S0005	2	0	0	8	10	3	0.13	0	0	0.64	0.81	0.24	0.0433333	0.563333	3.70044	0.00210753	0.00427386	up
CIL0385S0017	42	26	20	580	217	145	1.95	1.22	0.91	32.5	12.33	8.11	1.36	17.6467	3.69772	8.15066e-15	6.57599e-14	up
CIL1226S0054	228	228	200	2472	1899	2639	5.34	5.38	4.62	69.96	54.51	74.52	5.11333	66.33	3.69733	2.43854e-158	2.86052e-155	up
CIL1015S0038	311	199	217	2397	2180	3147	13.94	8.99	9.59	129.9	119.83	170.18	10.84	139.97	3.69068	5.46634e-66	6.94926e-64	up
CIL1242S0018	0	1	0	6	3	2	0	0.1	0	0.7	0.36	0.23	0.0333333	0.43	3.6893	0.0085417	0.0154097	up
CIL0554S0001	0	2	0	9	6	6	0	0.07	0	0.38	0.26	0.26	0.0233333	0.3	3.6845	0.00100694	0.00215724	up
CIL1246S0081	40	39	51	579	355	436	2.8	2.75	3.52	49.01	30.48	36.83	3.02333	38.7733	3.68085	7.78076e-71	1.15401e-68	up
CIL0450S0012	73	77	78	1172	605	630	2.38	2.55	2.53	46.31	24.24	24.86	2.48667	31.8033	3.67689	4.85013e-49	2.87741e-47	up
CIL1023S0074	297	327	276	2886	2179	4392	13.01	14.44	11.92	152.85	117.06	232.12	13.1233	167.343	3.6726	2.11839e-54	1.67184e-52	up
CIL0908S0127	30	28	17	573	54	163	1.42	1.34	0.8	32.9	3.14	9.34	1.18667	15.1267	3.67211	6.27029e-09	2.76851e-08	up
CIL1084S0023	29	19	34	264	257	332	2.29	1.52	2.62	25.11	24.81	31.55	2.14333	27.1567	3.66338	6.94654e-49	4.09291e-47	up
CIL1501S0003	16	31	17	277	206	183	0.6	1.18	0.63	12.61	9.51	8.31	0.803333	10.1433	3.65839	2.46477e-32	6.34814e-31	up
CIL0990S0063	2	2	1	36	11	5	0.18	0.19	0.09	4	1.24	0.55	0.153333	1.93	3.65386	4.30415e-05	0.000114785	up
CIL0009S0027	4727	3950	3088	31701	49907	39909	192.74	162.41	124.16	1562.77	2495.58	1963.2	159.77	2007.18	3.6511	5.20544e-39	1.93569e-37	up
CIL1463S0024	235	261	201	2727	982	3504	8.73	9.77	7.36	122.44	44.72	156.99	8.62	108.05	3.64787	1.6384e-24	2.75275e-23	up
CIL1147S0029	23	22	16	364	164	102	3.05	2.94	2.09	58.28	26.63	16.3	2.69333	33.7367	3.64685	6.60411e-17	6.32768e-16	up
MSTRG.26013	34	25	32	353	362	223	2.24	2.13	2.91	33.97	35.1	22.05	2.42667	30.3733	3.64576	1.82224e-34	5.28984e-33	up
CIL0984S0060	2	3	2	11	43	19	0.11	0.17	0.11	0.73	2.89	1.26	0.13	1.62667	3.64534	9.55541e-07	3.21173e-06	up
CIL1424S0021	88	72	85	810	358	1351	1.71	1.41	1.63	19.05	8.54	31.7	1.58333	19.7633	3.64179	1.67313e-22	2.43947e-21	up
CIL0263S0001	1058	476	357	1772	13899	3612	63.52	28.82	21.13	128.62	1023.32	261.61	37.8233	471.183	3.63894	2.87343e-08	1.17408e-07	up
CIL0968S0002	0	1	1	19	1	2	0	0.08	0.08	1.72	0.09	0.18	0.0533333	0.663333	3.63662	0.00900543	0.0161582	up
CIL0073S0014	0	0	3	15	10	5	0	0	0.1	0.62	0.4	0.22	0.0333333	0.413333	3.63227	0.00055734	0.00124876	up
CIL1599S0011	146	133	156	604	2276	1540	20.5	18.84	21.6	102.56	392.01	260.94	20.3133	251.837	3.63199	1.735e-16	1.606e-15	up
MSTRG.23260	182	239	154	2125	1107	2628	7.29	9.65	6.08	102.89	54.37	126.97	7.67333	94.7433	3.6261	4.20315e-36	1.32605e-34	up
MSTRG.16852	1	4	5	37	28	38	0.08	0.31	0.38	3.4	2.61	3.48	0.256667	3.16333	3.62348	7.28073e-13	4.87403e-12	up
CIL0902S0080	18	26	48	47	730	143	0.92	1.35	2.43	2.92	46	8.86	1.56667	19.26	3.61984	2.15888e-06	6.9279e-06	up
CIL0906S0032	16	2	7	70	84	99	0.9	0.11	0.39	4.74	5.77	6.69	0.466667	5.73333	3.61891	2.11065e-13	1.49232e-12	up
CIL1236S0007	14	12	17	191	72	171	1.14	0.99	1.36	18.8	7.19	16.79	1.16333	14.26	3.61564	5.63638e-23	8.48151e-22	up
CIL1037S0032	2	4	7	47	12	72	0.11	0.23	0.39	3.2	0.83	4.89	0.243333	2.97333	3.61108	7.29097e-08	2.83584e-07	up
CIL1259S0016	5	4	0	57	7	27	0.47	0.38	0	6.49	0.81	3.07	0.283333	3.45667	3.60881	2.83609e-05	7.75574e-05	up
CIL0893S0269	207	236	202	2840	1656	1980	11.62	13.36	11.19	192.82	114.04	134.14	12.0567	147	3.60791	1.87844e-85	3.94122e-83	up
CIL1061S0076	669	771	552	7258	5148	7605	29.05	33.76	23.64	381.04	274.15	398.41	28.8167	351.2	3.60732	1.3456e-89	3.1569e-87	up
CIL0427S0007	6	3	7	59	17	83	0.33	0.17	0.38	3.95	1.16	5.55	0.293333	3.55333	3.59856	1.05081e-09	5.07262e-09	up
CIL1251S0025	0	0	2	4	9	7	0	0	0.09	0.22	0.49	0.38	0.03	0.363333	3.59826	0.00184631	0.00377887	up
CIL1469S0011	245	228	292	2138	1925	3554	8.98	8.43	10.56	94.78	86.56	157.22	9.32333	112.853	3.59746	3.127e-51	2.07451e-49	up
CIL0859S0001	0	0	1	5	3	2	0	0	0.1	0.6	0.37	0.24	0.0333333	0.403333	3.59694	0.0111216	0.0196263	up
CIL1030S0029	1025	1680	815	11886	11488	11706	41.43	68.47	32.48	580.84	569.44	570.82	47.46	573.7	3.59551	3.51589e-37	1.1799e-35	up
CIL1603S0025	167	138	140	1959	747	1713	6.34	5.29	5.24	89.98	34.8	78.51	5.62333	67.7633	3.59101	1.78123e-37	6.04844e-36	up
CIL1239S0015	31	53	42	530	280	439	1.12	1.94	1.5	23.25	12.46	19.22	1.52	18.31	3.59049	9.28064e-43	4.20924e-41	up
CIL1416S0005	310	336	285	3959	1166	4125	12.9	14.1	11.69	199.14	59.49	207.05	12.8967	155.227	3.58931	2.35662e-23	3.63089e-22	up
CIL1370S0022	67	48	64	995	289	487	2.32	1.67	2.18	41.63	12.26	20.33	2.05667	24.74	3.58847	3.927e-23	5.96142e-22	up
CIL0202S0011	0	0	4	15	21	3	0	0	0.71	3.26	4.63	0.65	0.236667	2.84667	3.58835	0.00181761	0.00372426	up
CIL0925S0094	145	123	88	1424	529	1580	3.98	3.41	2.38	47.29	17.82	52.36	3.25667	39.1567	3.58779	2.89083e-25	5.06131e-24	up
CIL1359S0006	253	328	301	2886	3083	2746	7.04	9.2	8.26	97.07	105.18	92.16	8.16667	98.1367	3.58697	2.6199e-76	4.53771e-74	up
CIL0984S0079	9	13	22	178	62	195	0.48	0.7	1.16	11.47	4.05	12.54	0.78	9.35333	3.58393	5.46981e-16	4.88779e-15	up
CIL0905S0001	4	0	2	42	8	9	0.15	0	0.08	1.95	0.38	0.42	0.0766667	0.916667	3.57973	0.000105148	0.000263989	up
CIL0287S0002	0	2	1	13	2	14	0	0.13	0.06	1.02	0.16	1.09	0.0633333	0.756667	3.57862	0.000893406	0.00193109	up
MSTRG.3731	1	3	1	10	11	28	0.04	0.12	0.04	0.47	0.55	1.36	0.0666667	0.793333	3.57289	6.62005e-06	1.97942e-05	up
CIL0917S0067	0	3	1	2	32	5	0	0.38	0.12	0.3	4.9	0.75	0.166667	1.98333	3.57289	0.00263766	0.00525394	up
MSTRG.19455	19	12	23	147	251	127	2.54	1.61	3.03	23.79	41.08	20.52	2.39333	28.4633	3.57201	8.49518e-19	9.46202e-18	up
CIL0921S0079	76	53	61	837	652	366	5.08	3.57	4.02	67.65	53.45	29.52	4.22333	50.2067	3.57142	2.95649e-29	6.51008e-28	up
MSTRG.26014	22	26	23	231	308	148	4.05	4.91	4.23	52.41	70.82	33.42	4.39667	52.2167	3.57003	5.45696e-23	8.22111e-22	up
CIL1175S0049	182	244	372	4346	2174	1249	18.07	24.44	36.43	521.84	264.79	149.65	26.3133	312.093	3.56811	3.45857e-18	3.70354e-17	up
CIL1520S0041	29	11	27	138	295	214	2.23	0.85	2.04	12.8	27.76	19.81	1.70667	20.1233	3.55962	7.86878e-17	7.48781e-16	up
CIL0906S0089	0	0	2	8	2	10	0	0	0.09	0.41	0.12	0.53	0.03	0.353333	3.558	0.0036727	0.00711519	up
MSTRG.10198	2	1	2	18	14	16	0.12	0.06	0.11	1.28	1.01	1.12	0.0966667	1.13667	3.55565	2.0542e-07	7.53342e-07	up
CIL1018S0015	3	2	18	98	28	94	0.15	0.1	0.91	6.07	1.76	5.81	0.386667	4.54667	3.55565	3.11209e-07	1.11485e-06	up
CIL1618S0023	499	528	806	6392	6466	4700	16.26	17.35	25.9	251.88	258.45	184.81	19.8367	231.713	3.5461	1.01665e-44	4.97851e-43	up
MSTRG.28261	200	205	210	1903	2428	1562	21.86	22.6	22.63	251.49	325.48	205.99	22.3633	260.987	3.54477	1.31596e-45	6.73829e-44	up
CIL1352S0006	34	86	144	1197	835	492	0.56	1.43	2.34	23.85	16.88	9.78	1.44333	16.8367	3.54413	2.73125e-14	2.08475e-13	up
CIL1138S0029	89	83	147	801	1570	672	18.92	17.79	30.82	205.89	409.34	172.36	22.51	262.53	3.54384	7.2227e-19	8.10418e-18	up
CIL1443S0019	367	285	283	4468	2237	2264	52.71	41.28	40.08	775.91	394.05	392.33	44.69	520.763	3.5426	2.3158e-43	1.08072e-41	up
CIL1064S0037	1	0	0	2	7	1	0.11	0	0	0.25	0.9	0.13	0.0366667	0.426667	3.54057	0.0190979	0.0320476	up
CIL1403S0036	20	8	4	75	18	213	0.8	0.32	0.16	3.65	0.89	10.34	0.426667	4.96	3.53916	2.57123e-06	8.15782e-06	up
CIL1071S0071	1	0	1	14	4	1	0.05	0	0.05	0.85	0.25	0.06	0.0333333	0.386667	3.53605	0.00710169	0.012999	up
MSTRG.1526	9	6	4	67	21	94	0.27	0.18	0.12	2.43	0.77	3.41	0.19	2.20333	3.53562	1.93492e-10	1.00959e-09	up
MSTRG.26015	309	394	320	3556	3446	2731	16.07	20.51	16.25	222.22	218.37	169.99	17.61	203.527	3.53075	9.1827e-65	1.09206e-62	up
CIL1490S0018	111	112	141	988	1043	1423	4.77	4.85	5.97	51.29	54.93	73.72	5.19667	59.98	3.52882	5.43448e-64	6.12435e-62	up
CIL0940S0059	1093	1112	945	10741	5460	13675	25.21	25.86	21.49	299.54	154.45	380.54	24.1867	278.177	3.52372	1.02599e-40	4.18953e-39	up
CIL1340S0038	1106	956	1274	10959	9707	10819	45.07	39.28	51.19	539.93	485.11	531.9	45.18	518.98	3.52192	6.56273e-150	6.27275e-147	up
CIL0143S0012	143	136	136	1181	1875	843	5.32	5.1	4.99	53.08	85.49	37.81	5.13667	58.7933	3.51675	1.76068e-25	3.13581e-24	up
MSTRG.20469	4	3	6	46	8	68	0.61	0.46	0.91	8.54	1.51	12.59	0.66	7.54667	3.5153	5.16033e-07	1.80207e-06	up
CIL0919S0136	29	16	22	151	273	205	1.33	0.74	0.99	8.35	15.31	11.31	1.02	11.6567	3.51451	1.92354e-22	2.79352e-21	up
CIL1134S0008	6	4	11	121	42	35	0.46	0.31	0.83	11.14	3.92	3.22	0.533333	6.09333	3.51412	2.11742e-10	1.10059e-09	up
CIL1130S0047	36	36	27	409	59	463	0.62	0.64	0.46	8.63	1.27	9.75	0.573333	6.55	3.51405	1.58484e-10	8.35035e-10	up
MSTRG.835	71	54	46	245	623	656	7.54	5.71	5.39	35.13	90.83	86.96	6.21333	70.9733	3.51384	5.68182e-18	5.95334e-17	up
CIL1225S0014	60	60	83	625	845	428	3.32	3.34	4.52	41.76	57.27	28.54	3.72667	42.5233	3.5123	3.81426e-27	7.54288e-26	up
CIL1295S0016	459	630	433	7896	3153	3226	20.69	28.64	19.25	430.4	174.33	175.47	22.86	260.067	3.50798	3.59802e-26	6.74811e-25	up
CIL1318S0010	116	174	136	2575	203	1225	7.28	11.01	8.41	195.35	15.62	92.73	8.9	101.233	3.50774	4.30042e-09	1.93549e-08	up
CIL1106S0054	36	43	42	393	377	355	1.64	1.98	1.89	21.65	21.06	19.51	1.83667	20.74	3.49725	9.12904e-66	1.14366e-63	up
MSTRG.24769	0	0	2	1	1	16	0	0	0.22	0.14	0.14	2.2	0.0733333	0.826667	3.49476	0.0297517	0.0479278	up
CIL1047S0030	72	86	65	852	315	900	3.66	4.41	3.26	52.42	19.66	55.26	3.77667	42.4467	3.49047	2.18191e-26	4.13122e-25	up
CIL1512S0032	11	6	7	171	3	47	0.77	0.42	0.48	14.52	0.26	3.98	0.556667	6.25333	3.48974	0.000111973	0.000279737	up
CIL1158S0096	34	61	30	524	190	443	1.08	1.96	0.94	20.21	7.43	17.05	1.32667	14.8967	3.48911	9.95844e-21	1.27416e-19	up
CIL1009S0100	122	123	132	1859	455	1177	4.35	4.43	4.65	80.21	19.91	50.68	4.47667	50.2667	3.48911	2.06218e-21	2.78777e-20	up
MSTRG.732	1	0	0	5	2	2	0.19	0	0	1.18	0.48	0.47	0.0633333	0.71	3.48678	0.0181101	0.030523	up
CIL1031S0088	6	8	6	154	2	29	0.39	0.53	0.39	12.2	0.16	2.29	0.436667	4.88333	3.48326	0.00029585	0.000693208	up
CIL0207S0002	123	168	141	1183	1099	1689	7.1	9.77	8.02	82.52	77.76	117.56	8.29667	92.6133	3.48062	1.95845e-57	1.72498e-55	up
CIL1155S0062	116	112	126	604	1951	680	6.18	6.02	6.62	38.9	127.46	43.7	6.27333	70.02	3.48046	3.39548e-14	2.57099e-13	up
CIL1190S0053	64	30	41	313	513	410	9.63	4.55	6.08	56.94	94.67	74.43	6.75333	75.3467	3.47987	1.56013e-24	2.62637e-23	up
CIL0618S0002	4	1	4	32	28	23	0.23	0.06	0.22	2.2	1.94	1.55	0.17	1.89667	3.47986	1.5541e-10	8.19511e-10	up
CIL0921S0023	17	9	12	219	16	112	0.76	0.41	0.53	11.9	0.88	6.07	0.566667	6.28333	3.47096	2.20484e-07	8.05841e-07	up
CIL1095S0054	3	0	1	30	1	8	0.09	0	0.03	1.03	0.03	0.27	0.04	0.443333	3.47032	0.00327651	0.00641116	up
CIL1053S0047	2	0	1	18	9	0	0.13	0	0.07	1.47	0.74	0	0.0666667	0.736667	3.46597	0.011893	0.0208494	up
CIL1525S0037	10	17	13	280	47	38	0.83	1.43	1.07	28.15	4.79	3.81	1.11	12.25	3.46415	1.48141e-07	5.52388e-07	up
MSTRG.25901	12	30	42	559	69	134	0.89	2.24	3.07	50.09	6.27	11.98	2.06667	22.78	3.46239	9.16867e-08	3.5174e-07	up
CIL1037S0038	9	6	5	83	33	66	0.95	0.64	0.52	10.57	4.26	8.39	0.703333	7.74	3.46005	1.30818e-15	1.13404e-14	up
CIL0893S0413	0	4	0	12	7	16	0	0.4	0	1.54	0.85	2.01	0.133333	1.46667	3.45943	0.000441103	0.00100535	up
CIL1047S0144	962	883	854	9620	8132	6581	23.38	21.64	20.47	282.72	242.42	192.99	21.83	239.377	3.4549	4.51965e-81	8.57637e-79	up
MSTRG.23418	3	3	1	26	5	33	0.11	0.11	0.03	1.11	0.22	1.41	0.0833333	0.913333	3.45418	9.22333e-06	2.70208e-05	up
CIL1060S0017	407	374	589	3274	4982	4047	16.58	15.36	23.65	161.21	248.83	198.85	18.53	202.963	3.45328	3.2797e-36	1.03979e-34	up
CIL1293S0031	16	16	6	94	184	64	1.79	1.81	0.66	12.72	25.26	8.64	1.42	15.54	3.45202	2.79294e-11	1.59945e-10	up
CIL0425S0002	23	28	30	369	110	250	1.12	1.38	1.44	21.73	6.57	14.69	1.31333	14.33	3.44773	4.5459e-21	5.98551e-20	up
CIL1429S0023	243	262	266	1916	2023	2967	9.21	10.01	9.94	87.81	94.04	135.69	9.72	105.847	3.44488	6.76934e-63	7.30947e-61	up
CIL0899S0127	76	65	92	501	660	913	4.7	4.06	5.62	37.5	50.11	68.19	4.79333	51.9333	3.43756	2.25976e-36	7.24441e-35	up
CIL0922S0099	391	459	400	4287	2089	4770	16.24	19.22	16.38	215.25	106.39	238.99	17.28	186.877	3.43491	8.67178e-44	4.11383e-42	up
CIL1246S0067	516	573	600	2589	7677	4701	18.59	20.81	21.31	112.75	339.13	204.29	20.2367	218.723	3.43406	1.58268e-18	1.73142e-17	up
MSTRG.9700	5	4	1	62	9	19	0.1	0.08	0.02	1.48	0.22	0.45	0.0666667	0.716667	3.42626	8.08173e-06	2.38497e-05	up
CIL0948S0161	44	23	50	502	272	257	3.36	1.77	3.77	46.37	25.48	23.69	2.96667	31.8467	3.42423	5.59362e-26	1.03258e-24	up
CIL1294S0042	22	27	34	441	61	232	1.7	2.11	2.59	41.23	5.79	21.64	2.13333	22.8867	3.42333	5.36511e-11	2.96864e-10	up
CIL0993S0092	3	0	1	7	23	5	0.66	0	0.22	1.87	6.23	1.33	0.293333	3.14333	3.42168	0.000634632	0.00140656	up
MSTRG.7585	28	12	23	79	348	123	3.11	1.34	2.52	10.61	47.4	16.48	2.32333	24.83	3.41782	1.28591e-09	6.15001e-09	up
CIL1055S0012	139	126	187	2198	783	990	6.94	6.35	9.21	132.72	47.96	59.65	7.5	80.11	3.41702	1.60526e-25	2.86494e-24	up
CIL1128S0002	41	36	48	442	163	495	1.87	1.66	2.16	24.38	9.12	27.24	1.89667	20.2467	3.41615	3.16356e-23	4.83088e-22	up
MSTRG.5281	0	1	0	5	2	2	0	0.21	0	1.24	0.5	0.5	0.07	0.746667	3.41504	0.0180706	0.0304703	up
MSTRG.24189	35	28	31	69	473	274	2.17	1.75	1.9	5.18	36.04	20.54	1.94	20.5867	3.40758	1.52386e-09	7.21981e-09	up
CIL1173S0023	354	221	272	2587	2257	2546	38.82	24.44	29.41	342.97	303.51	336.81	30.89	327.763	3.40744	3.04458e-79	5.53321e-77	up
CIL1545S0049	34	29	27	550	83	154	3.37	2.9	2.64	65.95	10.09	18.43	2.97	31.49	3.40636	2.10269e-10	1.09315e-09	up
CIL0895S0085	14	16	17	214	36	161	0.96	1.11	1.15	17.73	3.03	13.32	1.07333	11.36	3.40379	1.99965e-11	1.15992e-10	up
CIL1113S0015	45	51	51	454	383	436	2.45	2.8	2.74	29.88	25.57	28.65	2.66333	28.0333	3.39584	2.00059e-91	5.01256e-89	up
CIL0310S0022	22	27	15	356	75	126	1.36	1.69	0.92	26.65	5.69	9.41	1.32333	13.9167	3.39457	5.44542e-12	3.32852e-11	up
MSTRG.22722	11	10	16	254	16	50	0.32	0.29	0.45	8.84	0.56	1.74	0.353333	3.71333	3.39361	4.54578e-06	1.38947e-05	up
CIL1178S0002	14	10	19	53	239	80	0.62	0.47	0.87	2.88	13.31	4.37	0.653333	6.85333	3.39091	3.41951e-09	1.55639e-08	up
CIL1343S0053	140	87	145	745	1216	1233	8.61	5.4	8.8	55.41	91.75	91.52	7.60333	79.56	3.38734	1.04566e-29	2.3713e-28	up
CIL1295S0048	1	1	2	30	4	1	0.07	0.07	0.13	2.41	0.33	0.08	0.09	0.94	3.38466	0.00353774	0.00687282	up
CIL1053S0048	30	44	17	360	188	236	1.53	2.26	0.86	22.22	11.77	14.53	1.55	16.1733	3.38328	2.88292e-23	4.41278e-22	up
CIL0967S0065	429	509	477	3133	5660	3314	12.18	14.57	13.35	107.53	197.04	113.5	13.3667	139.357	3.38207	7.6607e-28	1.57907e-26	up
CIL0106S0013	432	478	383	2262	3139	5696	27.88	31.11	24.38	176.53	248.49	443.58	27.79	289.533	3.38109	7.07606e-26	1.29329e-24	up
CIL1165S0017	314	294	284	2387	1907	3352	19.61	18.52	17.49	180.26	146.08	252.6	18.54	192.98	3.37974	9.06789e-68	1.21883e-65	up
CIL1316S0039	0	0	3	14	5	6	0	0	0.24	1.39	0.5	0.6	0.08	0.83	3.37504	0.00177392	0.0036385	up
CIL1354S0015	5248	6638	6941	52063	42143	65884	191.11	243.76	249.25	2292.29	1882.15	2894.63	228.04	2356.36	3.3692	3.58133e-76	6.12075e-74	up
CIL1025S0026	708	793	735	5161	7796	6003	28.83	32.57	29.52	254.12	389.38	294.95	30.3067	312.817	3.36761	2.8261e-42	1.24672e-40	up
CIL0895S0096	89	186	34	1024	266	1355	3.29	6.93	1.24	45.76	12.06	60.42	3.82	39.4133	3.36704	1.35314e-08	5.75107e-08	up
CIL1032S0126	0	8	7	118	1	8	0	0.32	0.27	5.65	0.05	0.38	0.196667	2.02667	3.36528	0.0104351	0.0185149	up
CIL1402S0020	1803	1473	2030	13964	14800	16094	105.15	86.63	116.74	984.65	1058.57	1132.42	102.84	1058.55	3.36361	4.2013e-86	9.03525e-84	up
CIL1053S0020	0	0	1	6	2	1	0	0	0.07	0.48	0.16	0.08	0.0233333	0.24	3.36257	0.0261852	0.0426859	up
CIL0919S0047	34	39	42	334	456	177	1.89	2.19	2.31	22.49	31.15	11.9	2.13	21.8467	3.35849	8.90015e-19	9.90881e-18	up
MSTRG.13666	35	29	46	152	233	449	0.29	0.24	0.38	1.66	2.59	5.08	0.303333	3.11	3.35794	1.95905e-16	1.80691e-15	up
CIL1180S0031	977	1417	1101	10185	7077	12244	47.33	69.22	52.6	596.56	420.47	715.63	56.3833	577.553	3.35661	2.74226e-55	2.21848e-53	up
CIL0486S0001	39	33	43	278	354	334	3.26	2.8	3.57	28.24	36.47	33.79	3.21	32.8333	3.35452	3.40283e-42	1.49348e-40	up
CIL1163S0013	2415	3120	2999	12673	34710	24078	78.05	101.68	95.58	495.21	1375.78	938.86	91.77	936.617	3.35136	3.3834e-19	3.88241e-18	up
CIL1030S0031	121	115	75	1225	532	861	4.29	4.12	2.62	52.56	23.15	36.86	3.67667	37.5233	3.35132	2.25111e-33	6.17369e-32	up
CIL1031S0016	3	3	7	34	18	57	0.21	0.21	0.49	2.89	1.55	4.83	0.303333	3.09	3.34863	2.42317e-09	1.1219e-08	up
CIL0967S0215	0	1	2	18	2	5	0	0.08	0.15	1.68	0.19	0.47	0.0766667	0.78	3.3468	0.00331933	0.0064866	up
CIL1169S0036	3	5	8	67	33	33	0.12	0.19	0.3	3.11	1.55	1.53	0.203333	2.06333	3.34306	3.8602e-12	2.39241e-11	up
CIL1138S0094	3	1	2	38	6	6	0.43	0.15	0.28	6.61	1.06	1.04	0.286667	2.90333	3.34026	0.000218731	0.000523282	up
MSTRG.19884	4	0	0	5	19	9	0.49	0	0	0.75	2.87	1.34	0.163333	1.65333	3.33949	0.00204684	0.00415797	up
CIL0938S0136	25	16	30	339	33	220	0.52	0.34	0.62	8.55	0.84	5.54	0.493333	4.97667	3.33455	1.96103e-08	8.1613e-08	up
CIL0940S0149	1	2	2	20	7	14	0.05	0.09	0.09	1.13	0.4	0.79	0.0766667	0.773333	3.33442	7.87873e-06	2.32847e-05	up
CIL1403S0034	1	6	13	5	87	71	0.08	0.48	1.02	0.48	8.53	6.84	0.526667	5.28333	3.32649	0.00020123	0.000484344	up
MSTRG.10807	0	4	2	37	8	5	0	0.55	0.27	6.06	1.33	0.82	0.273333	2.73667	3.32369	0.000705157	0.00155193	up
CIL0120S0015	582	416	354	4025	3750	3347	20.67	14.9	12.4	172.87	163.37	143.44	15.99	159.893	3.32187	1.55124e-52	1.11823e-50	up
CIL0008S0013	4	1	0	16	10	15	0.3	0.07	0	1.44	0.91	1.34	0.123333	1.23	3.31802	1.41004e-05	4.02756e-05	up
CIL1006S0091	3	2	5	56	8	18	0.17	0.12	0.28	3.86	0.56	1.24	0.19	1.88667	3.31177	7.40719e-06	2.19873e-05	up
CIL1120S0023	18	31	22	282	112	186	0.64	1.11	0.77	12.12	4.88	7.98	0.84	8.32667	3.30928	6.81263e-23	1.0198e-21	up
CIL1146S0025	1	7	6	57	22	36	0.05	0.35	0.29	3.38	1.32	2.13	0.23	2.27667	3.30722	1.83472e-09	8.61825e-09	up
CIL1447S0006	146	193	218	1748	1871	886	7.36	9.81	10.84	106.54	115.68	53.89	9.33667	92.0367	3.30123	2.65363e-24	4.38989e-23	up
CIL1060S0094	18	30	28	228	194	194	1.02	1.71	1.56	15.58	13.45	13.23	1.43	14.0867	3.30024	1.02565e-42	4.64368e-41	up
CIL1402S0034	15	10	8	160	45	63	0.3	0.2	0.16	3.86	1.1	1.52	0.22	2.16	3.29546	4.42114e-12	2.72632e-11	up
CIL1246S0106	10	9	9	79	15	133	0.69	0.63	0.61	6.59	1.27	11.07	0.643333	6.31	3.294	6.68764e-08	2.61418e-07	up
CIL0136S0001	37	36	33	384	345	124	1.51	1.48	1.33	18.96	17.28	6.11	1.44	14.1167	3.29326	3.56762e-16	3.22599e-15	up
CIL0897S0112	242	286	393	1658	3413	2323	8.45	10.07	13.52	69.96	146.08	97.81	10.68	104.617	3.29213	2.10476e-22	3.03619e-21	up
CIL1283S0022	138	174	137	1522	1471	612	3.71	4.72	3.64	49.53	48.55	19.87	4.02333	39.3167	3.28868	7.16037e-21	9.27184e-20	up
CIL1469S0031	0	1	2	20	4	1	0	0.06	0.11	1.32	0.27	0.07	0.0566667	0.553333	3.28758	0.00773756	0.0140711	up
MSTRG.19150	12	14	18	107	58	115	0.44	0.61	0.59	5.96	3.88	6.16	0.546667	5.33333	3.2863	5.53342e-21	7.23043e-20	up
CIL0940S0117	518	324	250	1677	4778	2276	23.68	14.93	11.27	92.67	267.83	125.51	16.6267	162.003	3.28445	5.32524e-14	3.96619e-13	up
CIL1175S0008	48	67	57	319	451	608	1.55	2.19	1.82	12.49	17.92	23.76	1.85333	18.0567	3.28434	8.81797e-29	1.90272e-27	up
CIL1034S0037	33	41	46	443	210	311	0.91	1.14	1.25	14.73	7.09	10.32	1.1	10.7133	3.28383	4.38085e-37	1.4588e-35	up
CIL1078S0059	10	2	0	35	16	46	1.12	0.23	0	4.72	2.19	6.19	0.45	4.36667	3.27854	2.75993e-05	7.55948e-05	up
CIL1081S0009	9	7	11	68	82	64	0.59	0.46	0.71	5.4	6.6	5.07	0.586667	5.69	3.27782	1.02139e-19	1.21976e-18	up
CIL0420S0009	52	33	44	390	114	527	2.45	1.57	2.06	22.26	6.62	30.03	2.02667	19.6367	3.27637	2.61104e-14	1.99417e-13	up
CIL0921S0022	9	30	9	240	20	124	0.44	1.48	0.43	14.22	1.2	7.33	0.783333	7.58333	3.27513	4.16635e-06	1.28154e-05	up
CIL0260S0005	206	234	175	2537	1362	1004	11.83	13.55	9.93	176.06	95.89	69.54	11.77	113.83	3.27369	1.32559e-26	2.5378e-25	up
MSTRG.22174	5	12	9	71	83	40	0.39	0.53	0.58	4.68	6.46	3.34	0.5	4.82667	3.27103	2.27255e-12	1.44133e-11	up
CIL0972S0061	218	265	252	1486	2450	1876	10.22	12.53	11.65	84.22	140.85	106.1	11.4667	110.39	3.26709	2.87888e-33	7.83704e-32	up
MSTRG.4390	153	74	98	567	1196	806	29.47	14.33	18.56	131.74	281.64	186.82	20.7867	200.067	3.26675	1.24636e-18	1.37691e-17	up
CIL1084S0021	5306	5847	6382	18567	79464	40186	116.25	129.18	137.88	491.83	2135.18	1062.24	127.77	1229.75	3.26674	1.06101e-12	6.96554e-12	up
CIL0967S0236	732	762	690	7442	3265	6593	43.64	45.81	40.57	536.46	238.74	474.25	43.34	416.483	3.26449	2.61187e-45	1.32166e-43	up
CIL0967S0213	0	0	2	6	2	8	0	0	0.15	0.54	0.18	0.72	0.05	0.48	3.26303	0.00793732	0.0144009	up
CIL1197S0003	163	151	149	1423	958	1269	10.78	10.07	9.72	113.8	77.71	101.27	10.19	97.5933	3.25963	7.48548e-134	4.95327e-131	up
CIL1061S0070	0	0	4	19	11	1	0	0	0.26	1.52	0.89	0.08	0.0866667	0.83	3.25956	0.0125282	0.0218737	up
CIL1263S0054	22	15	25	308	120	59	1.74	1.2	1.95	29.52	11.67	5.64	1.63	15.61	3.25953	1.24595e-10	6.62975e-10	up
CIL0899S0075	3	5	5	82	8	13	0.19	0.32	0.31	6.24	0.62	0.99	0.273333	2.61667	3.259	5.19528e-05	0.000137063	up
CIL1053S0051	74	75	112	604	745	697	4.31	4.41	6.44	42.55	53.24	49	5.05333	48.2633	3.25562	1.00165e-41	4.28685e-40	up
MSTRG.18208	3	4	5	28	22	44	0.13	0.18	0.22	1.5	1.2	2.36	0.176667	1.68667	3.25507	8.10249e-11	4.40398e-10	up
CIL1167S0033	465	479	479	5395	2802	2979	14.49	15.05	14.72	203.25	107.08	111.99	14.7533	140.773	3.25426	4.10825e-50	2.59221e-48	up
CIL1282S0019	59	50	37	589	278	280	4.18	3.57	2.59	50.47	24.16	23.94	3.44667	32.8567	3.25291	9.22214e-26	1.67249e-24	up
CIL0982S0101	10	4	7	82	32	51	1.03	0.42	0.71	10.21	4.04	6.34	0.72	6.86333	3.25284	2.52752e-13	1.77394e-12	up
CIL1268S0023	146	144	135	922	1578	820	10.64	10.58	9.7	81.23	141.02	72.09	10.3067	98.1133	3.25087	1.83638e-24	3.07338e-23	up
CIL0914S0094	683	590	617	4721	2434	7650	12.38	10.78	11.03	103.44	54.1	167.26	11.3967	108.267	3.24791	3.31334e-25	5.78926e-24	up
CIL1055S0047	101	137	119	2186	290	318	2.59	3.54	3.01	67.72	9.11	9.83	3.04667	28.8867	3.2451	8.24511e-08	3.18487e-07	up
MSTRG.21064	3	3	5	63	6	17	0.29	0.29	0.47	7.29	0.7	1.96	0.35	3.31667	3.24431	3.2925e-05	8.91694e-05	up
CIL1477S0021	39	51	36	445	320	216	1.26	1.66	1.15	17.39	12.68	8.42	1.35667	12.83	3.24138	5.41676e-27	1.06304e-25	up
CIL1132S0052	29	18	72	280	334	304	2.72	1.71	6.67	31.8	38.48	34.46	3.7	34.9133	3.23818	5.60251e-15	4.58997e-14	up
CIL1110S0016	208	233	261	2224	1438	1776	16.99	19.19	21.02	219.66	144.07	175.04	19.0667	179.59	3.23558	4.51134e-101	1.4553e-98	up
CIL1444S0024	67	61	108	287	1151	371	3	2.75	4.76	15.52	63.15	20.02	3.50333	32.8967	3.23114	2.98176e-10	1.52891e-09	up
CIL1020S0069	72	92	148	1414	414	575	1.87	2.41	3.79	44.4	13.19	18.02	2.69	25.2033	3.22794	1.08626e-15	9.48986e-15	up
CIL0990S0066	102	146	116	795	1333	664	4.66	6.72	5.22	43.87	74.62	36.57	5.53333	51.6867	3.22357	2.24374e-21	3.02056e-20	up
CIL1359S0009	29	19	30	396	100	99	0.57	0.38	0.58	9.46	2.42	2.36	0.51	4.74667	3.21835	4.66215e-11	2.60143e-10	up
CIL1015S0080	24	21	21	88	277	138	3.63	3.21	3.14	16.11	51.45	25.22	3.32667	30.9267	3.2167	1.59632e-12	1.02862e-11	up
CIL1367S0040	0	2	0	9	5	1	0	0.17	0	0.96	0.52	0.1	0.0566667	0.526667	3.21632	0.0190295	0.0319453	up
CIL1220S0036	12	13	20	78	180	85	0.68	0.74	1.11	5.31	12.43	5.77	0.843333	7.83667	3.21607	7.95156e-13	5.29801e-12	up
CIL1429S0024	93	77	88	556	588	823	6.97	5.82	6.5	50.36	54.02	74.38	6.43	59.5867	3.2121	1.72674e-52	1.23783e-50	up
CIL1387S0007	26	34	108	385	648	235	0.83	1.09	3.4	14.86	25.38	9.05	1.77333	16.43	3.2118	1.41566e-09	6.73222e-09	up
CIL1358S0005	1708	1725	1943	19073	13337	8490	39.78	40.51	44.62	537.06	380.93	238.55	41.6367	385.513	3.21085	2.01382e-33	5.54059e-32	up
MSTRG.14366	93	88	75	748	514	694	6.04	5.79	4.84	58.83	41.01	54.48	5.55667	51.44	3.2106	5.0709e-92	1.29569e-89	up
MSTRG.19454	32	43	67	507	393	177	4.15	5.62	8.57	79.43	62.51	27.63	6.11333	56.5233	3.20882	1.2499e-15	1.08497e-14	up
CIL0123S0001	107	128	91	1425	630	423	3.69	4.45	3.09	59.35	26.62	17.58	3.74333	34.5167	3.2049	2.18458e-17	2.18348e-16	up
CIL1175S0039	31	34	26	357	191	142	1.18	1.3	0.97	16.4	8.9	6.51	1.15	10.6033	3.20481	3.04205e-21	4.05298e-20	up
CIL1604S0029	0	2	1	10	2	11	0	0.22	0.11	1.32	0.27	1.45	0.11	1.01333	3.20353	0.0021475	0.00434943	up
CIL1531S0046	168	106	119	193	2457	303	11.84	7.54	8.27	16.45	212.45	25.77	9.21667	84.89	3.20328	9.08817e-06	2.66639e-05	up
CIL1133S0044	7	8	19	103	93	60	0.49	0.57	1.31	8.74	8	5.08	0.79	7.27333	3.20269	9.11808e-15	7.31752e-14	up
CIL0919S0143	2	3	2	18	17	17	0.19	0.29	0.19	2.12	2.03	2	0.223333	2.05	3.19835	9.10512e-08	3.4951e-07	up
MSTRG.21616	2	1	17	35	83	31	0.17	0.08	1.39	3.5	8.43	3.1	0.546667	5.01	3.19608	4.95466e-05	0.000131063	up
CIL0359S0010	1	1	2	21	1	8	0.05	0.05	0.09	1.22	0.06	0.46	0.0633333	0.58	3.19502	0.0024932	0.00498582	up
CIL1374S0029	34	69	54	540	94	549	1.06	2.17	1.66	20.41	3.6	20.7	1.63	14.9033	3.19269	4.10117e-10	2.07195e-09	up
CIL1305S0050	231	299	295	2403	1248	2546	13.98	18.24	17.6	175.78	92.6	185.85	16.6067	151.41	3.18863	1.88201e-43	8.83075e-42	up
CIL1025S0037	131	163	114	1255	716	1096	4.46	5.6	3.83	51.68	29.91	45.04	4.63	42.21	3.1885	1.6985e-53	1.27053e-51	up
CIL0024S0022	6	4	20	192	9	22	0.17	0.12	0.55	6.55	0.32	0.75	0.28	2.54	3.18133	0.000464566	0.0010538	up
CIL1110S0042	119	111	107	903	605	1009	8.28	7.79	7.34	75.97	51.63	84.71	7.80333	70.77	3.18098	8.54588e-74	1.36138e-71	up
CIL0979S0034	107	110	132	549	899	1153	4.8	4.98	5.84	29.77	49.45	62.39	5.20667	47.2033	3.18046	6.52509e-27	1.27474e-25	up
CIL0929S0149	238	211	306	1156	2741	1705	6.47	5.78	8.2	38	91.39	55.93	6.81667	61.7733	3.17985	3.36053e-19	3.85788e-18	up
MSTRG.4538	21	28	22	253	40	238	0.96	1.29	0.99	13.98	2.24	13.12	1.08	9.78	3.1788	7.98722e-10	3.91057e-09	up
CIL1165S0016	89	86	82	625	459	833	6.33	6.16	5.75	53.71	40.01	71.44	6.08	55.0533	3.17869	1.38939e-52	1.00437e-50	up
CIL0906S0101	6	27	11	256	36	36	0.2	0.9	0.36	10.28	1.47	1.44	0.486667	4.39667	3.1754	1.90142e-05	5.33485e-05	up
CIL1447S0020	573	645	684	3832	6080	4169	25.34	28.76	29.83	204.89	329.75	222.43	27.9767	252.357	3.17317	6.83985e-33	1.81228e-31	up
CIL1313S0013	9	2	10	122	17	16	0.3	0.07	0.33	4.93	0.7	0.64	0.233333	2.09	3.16304	5.40288e-05	0.000142205	up
CIL1564S0017	92	90	101	741	789	545	7.15	7.06	7.74	69.67	75.24	51.13	7.31667	65.3467	3.15886	8.72051e-43	3.96215e-41	up
CIL0049S0004	31	26	25	178	164	260	4.1	3.47	3.26	28.5	26.63	41.54	3.61	32.2233	3.15803	2.87563e-35	8.68987e-34	up
CIL1071S0085	90	187	209	2303	312	960	3.04	6.36	6.95	93.93	12.91	39.07	5.45	48.6367	3.15772	3.21241e-09	1.46627e-08	up
CIL1608S0008	12	8	9	89	39	86	0.52	0.35	0.38	4.63	2.06	4.46	0.416667	3.71667	3.15704	6.32129e-17	6.0667e-16	up
CIL1053S0026	912	1076	1098	4248	11142	7114	28.74	34.19	34.12	161.85	430.62	270.48	32.35	287.65	3.15248	2.90979e-18	3.1341e-17	up
CIL1481S0022	6	5	10	32	101	19	1.01	0.84	1.65	6.49	20.78	3.84	1.16667	10.37	3.15195	1.31061e-06	4.32905e-06	up
MSTRG.21061	58	72	75	664	520	311	3.71	4.65	4.73	51.39	40.82	24.02	4.36333	38.7433	3.15045	9.03184e-27	1.74857e-25	up
CIL0131S0030	12	11	23	161	72	102	0.81	0.75	1.53	13.15	5.97	8.31	1.03	9.14333	3.15008	1.49184e-18	1.6369e-17	up
CIL1031S0115	4	9	7	105	22	19	0.24	0.54	0.41	7.58	1.61	1.37	0.396667	3.52	3.14958	1.99569e-06	6.44025e-06	up
MSTRG.8955	5	5	4	17	23	62	0.19	0.19	0.15	0.8	1.06	2.84	0.176667	1.56667	3.1486	1.0865e-07	4.12465e-07	up
CIL0211S0009	24	36	34	274	149	263	1.48	2.24	2.07	20.45	11.28	19.59	1.93	17.1067	3.14789	3.49282e-34	9.9163e-33	up
MSTRG.7382	2	1	0	16	3	3	0.33	0.17	0	3.21	0.61	0.6	0.166667	1.47333	3.14405	0.00495694	0.00935731	up
CIL1153S0068	238	285	264	2988	1001	1745	7.43	8.97	8.12	112.72	38.3	65.69	8.17333	72.2367	3.14373	2.18775e-26	4.13923e-25	up
CIL1171S0005	313	222	199	663	2740	1911	20.37	14.57	12.77	52.18	218.73	150.07	15.9033	140.327	3.14139	5.88334e-12	3.59024e-11	up
CIL1549S0033	10	0	8	55	36	39	0.38	0	0.3	2.53	1.68	1.79	0.226667	2	3.14136	7.36075e-08	2.86126e-07	up
CIL0158S0005	10	3	10	66	23	81	0.67	0.2	0.64	5.16	1.84	6.32	0.503333	4.44	3.14097	1.0827e-09	5.21973e-09	up
CIL1464S0020	57	70	67	1214	52	146	1.63	2.02	1.89	41.96	1.82	5.04	1.84667	16.2733	3.13951	4.28464e-05	0.000114324	up
CIL1539S0033	55	48	52	403	234	486	2.96	2.61	2.76	26.26	15.47	31.6	2.77667	24.4433	3.13802	2.29987e-38	8.24345e-37	up
MSTRG.11392	3	0	0	14	2	6	0.48	0	0	2.68	0.39	1.15	0.16	1.40667	3.13614	0.00930684	0.0166527	up
CIL0895S0136	93	124	86	921	466	793	3.42	4.6	3.12	40.98	21.03	35.21	3.71333	32.4067	3.1255	1.41603e-39	5.44613e-38	up
CIL0942S0039	8	1	7	75	11	29	0.6	0.08	0.51	6.76	1.01	2.61	0.396667	3.46	3.12477	1.47546e-05	4.20094e-05	up
CIL0008S0019	259	295	328	3488	1418	1404	8.03	9.22	10.01	130.78	53.92	52.54	9.08667	79.08	3.12149	6.11719e-24	9.82979e-23	up
CIL1145S0103	259	295	328	3488	1418	1404	8.03	9.22	10.01	130.78	53.92	52.54	9.08667	79.08	3.12149	6.11719e-24	9.82979e-23	up
CIL1090S0076	209	296	302	2265	1527	1981	9.94	14.2	14.17	130.31	89.11	113.72	12.77	111.047	3.12034	1.23068e-66	1.588e-64	up
CIL1010S0001	19	16	17	187	64	121	1.15	0.97	1.01	13.64	4.74	8.81	1.04333	9.06333	3.11884	1.58178e-18	1.73117e-17	up
CIL1043S0080	163	264	409	4284	1030	643	10.82	17.68	26.78	343.91	83.87	51.51	18.4267	159.763	3.11607	3.13328e-08	1.27339e-07	up
CIL1078S0017	91	110	180	1366	606	740	2.44	2.98	4.76	44.3	19.93	23.95	3.39333	29.3933	3.11471	2.73593e-23	4.19774e-22	up
CIL1185S0018	331	332	431	3212	1174	3389	11.37	11.5	14.6	133.45	49.48	140.51	12.49	107.813	3.10969	4.82237e-24	7.82711e-23	up
CIL0899S0149	32	51	57	420	319	252	1.97	3.17	3.46	31.3	24.11	18.74	2.86667	24.7167	3.10804	2.84477e-29	6.26943e-28	up
CIL0833S0001	27	31	42	637	22	52	2.77	3.21	4.25	78.97	2.77	6.43	3.41	29.39	3.10748	0.000234807	0.000558907	up
CIL1520S0032	3226	2123	1269	9601	22425	14837	319.01	211.71	123.74	1147.91	2719.64	1770.15	218.153	1879.23	3.10673	1.9038e-14	1.47365e-13	up
MSTRG.19236	28	49	37	137	509	156	1.39	2.45	1.81	8.21	30.93	9.33	1.88333	16.1567	3.10077	2.30282e-09	1.0704e-08	up
CIL1133S0042	1312	1668	1066	9210	7285	12023	49.6	63.58	39.74	420.94	337.74	548.34	50.9733	435.673	3.09543	2.71032e-43	1.26027e-41	up
CIL0948S0163	2	0	0	4	1	9	0.28	0	0	0.68	0.17	1.54	0.0933333	0.796667	3.09351	0.0237569	0.0390531	up
CIL1144S0017	19	17	16	142	95	128	0.84	0.75	0.69	7.55	5.12	6.79	0.76	6.48667	3.09341	6.6516e-36	2.07818e-34	up
CIL1102S0065	3	2	3	14	30	12	0.43	0.29	0.42	2.41	5.23	2.06	0.38	3.23333	3.08895	3.12238e-06	9.79449e-06	up
CIL1524S0009	3	7	0	29	11	31	0.24	0.57	0	2.81	1.08	3	0.27	2.29667	3.08851	2.03484e-05	5.68323e-05	up
CIL0929S0183	15	27	23	222	96	137	1.63	2.96	2.47	29.2	12.81	17.98	2.35333	19.9967	3.08698	5.93277e-21	7.73658e-20	up
MSTRG.9406	2	5	6	85	0	5	0.06	0.15	0.17	3.04	0	0.18	0.126667	1.07333	3.08299	0.0151518	0.0259592	up
CIL0073S0030	129	104	104	915	411	1023	5.38	4.37	4.27	46.11	21.01	51.44	4.67333	39.52	3.08006	2.42653e-29	5.36142e-28	up
MSTRG.8402	46	17	30	309	70	269	1.55	0.58	0.99	12.57	2.89	10.92	1.04	8.79333	3.07983	8.13693e-11	4.41991e-10	up
CIL1482S0020	2	0	6	13	26	14	0.39	0	1.07	3.04	6.04	3.26	0.486667	4.11333	3.0793	7.00783e-05	0.00018096	up
CIL0407S0004	194	208	172	2137	703	1153	4.99	5.4	4.37	66.5	22.19	35.8	4.92	41.4967	3.07627	9.22041e-24	1.46612e-22	up
MSTRG.28393	33	11	14	13	304	80	1.59	0.56	0.66	0.76	18.15	4.7	0.936667	7.87	3.07076	0.000105393	0.00026445	up
CIL0123S0002	36	42	26	403	194	121	2.02	2.38	1.44	27.36	13.36	8.2	1.94667	16.3067	3.06638	2.13847e-14	1.64395e-13	up
CIL0010S0001	1	5	3	53	2	7	0.05	0.26	0.15	3.29	0.13	0.43	0.153333	1.28333	3.06515	0.00286049	0.00566024	up
CIL0919S0126	14	9	19	103	71	115	0.74	0.48	0.99	6.57	4.6	7.32	0.736667	6.16333	3.06463	5.73391e-24	9.24266e-23	up
CIL0893S0367	10	16	14	121	93	61	0.37	0.59	0.51	5.38	4.2	2.71	0.49	4.09667	3.0636	1.13888e-17	1.16863e-16	up
CIL0218S0003	842	952	820	7480	3762	6770	41.34	47.13	39.7	444	226.51	401	42.7233	357.17	3.06351	7.39532e-53	5.43735e-51	up
CIL0940S0198	12	14	10	146	21	82	1.14	1.34	0.94	16.74	2.44	9.38	1.14	9.52	3.06193	2.07055e-08	8.59633e-08	up
CIL1242S0107	92	74	66	627	384	582	2.26	1.84	1.6	18.65	11.58	17.27	1.9	15.8333	3.05889	1.67487e-57	1.48534e-55	up
CIL1003S0104	373	332	303	3348	1829	1735	17.94	16.11	14.37	194.74	107.91	100.7	16.14	134.45	3.05836	6.08541e-39	2.25641e-37	up
CIL1153S0033	49	34	69	678	150	211	2.28	1.59	3.16	38.12	8.55	11.84	2.34333	19.5033	3.05709	7.70436e-11	4.19553e-10	up
CIL1061S0066	2	1	4	6	39	1	0.08	0.04	0.16	0.3	1.98	0.05	0.0933333	0.776667	3.05683	0.00419177	0.00803084	up
CIL1112S0034	85	76	91	545	366	813	3.42	3.08	3.61	26.49	18.05	39.44	3.37	27.9933	3.05426	2.01942e-33	5.55006e-32	up
CIL1138S0059	3	7	2	38	9	35	0.11	0.25	0.07	1.65	0.4	1.52	0.143333	1.19	3.05352	2.2688e-06	7.25898e-06	up
CIL1037S0039	8	14	9	129	29	54	0.57	1.01	0.64	11.19	2.55	4.67	0.74	6.13667	3.05186	2.01835e-09	9.44641e-09	up
CIL1132S0008	1203	1162	1322	9804	4676	10686	44.04	42.9	47.72	433.93	209.93	471.96	44.8867	371.94	3.05071	5.80163e-39	2.15428e-37	up
CIL1076S0071	0	1	1	7	1	6	0	0.04	0.03	0.29	0.04	0.25	0.0233333	0.193333	3.05063	0.0119717	0.0209723	up
CIL1048S0020	9	1	5	43	36	23	0.32	0.04	0.18	1.87	1.59	1	0.18	1.48667	3.04601	2.58185e-08	1.05963e-07	up
CIL0990S0142	239	282	231	2025	1002	2083	10.8	12.85	10.3	110.67	55.55	113.59	11.3167	93.27	3.04296	1.90267e-39	7.23159e-38	up
CIL1400S0039	13	11	6	71	48	84	0.67	0.57	0.3	4.42	3.03	5.22	0.513333	4.22333	3.04041	4.60764e-18	4.87134e-17	up
CIL1293S0062	1	0	3	15	0	12	0.13	0	0.38	2.33	0	1.86	0.17	1.39667	3.03838	0.0218071	0.0361471	up
CIL0061S0010	60	58	53	602	198	352	1.88	1.83	1.63	22.76	7.59	13.28	1.78	14.5433	3.03041	5.68683e-22	8.03284e-21	up
CIL1246S0063	1082	1146	876	11295	3288	6326	23.65	25.26	18.88	298.54	88.15	166.85	22.5967	184.513	3.02954	1.74319e-20	2.18381e-19	up
CIL0150S0007	1	3	7	49	4	20	0.02	0.08	0.17	1.48	0.12	0.6	0.09	0.733333	3.02647	0.000362462	0.000837877	up
CIL1266S0026	12	11	22	96	83	122	1.07	0.98	1.93	10.31	9.04	13.07	1.32667	10.8067	3.02604	7.46021e-23	1.1148e-21	up
CIL1459S0024	2781	2070	1833	12955	17144	14639	172.31	129.34	111.99	970.49	1302.73	1094.3	137.88	1122.51	3.02524	3.00905e-37	1.01642e-35	up
CIL1417S0082	29	27	31	445	58	81	1.99	1.87	2.1	36.92	4.88	6.71	1.98667	16.17	3.0249	3.8945e-07	1.37905e-06	up
MSTRG.17015	12	15	22	216	37	75	0.29	0.37	0.52	6.3	1.1	2.18	0.393333	3.19333	3.02124	1.33355e-08	5.67249e-08	up
MSTRG.9879	20	11	7	76	119	58	2.18	1.21	0.75	10.03	15.93	7.64	1.38	11.2	3.02076	2.38266e-11	1.37314e-10	up
CIL1555S0004	10	18	20	108	142	68	0.55	1	1.08	7.18	9.57	4.51	0.876667	7.08667	3.01501	6.23582e-14	4.61508e-13	up
CIL0037S0003	34	18	25	134	235	141	4.83	2.58	3.5	23.03	40.97	24.18	3.63667	29.3933	3.0148	1.30597e-16	1.22113e-15	up
CIL0990S0134	1	1	1	19	2	0	0.07	0.07	0.07	1.53	0.16	0	0.07	0.563333	3.00856	0.0260722	0.0425209	up
CIL0118S0004	121	99	71	800	627	501	5.16	4.26	2.99	41.25	32.8	25.78	4.13667	33.2767	3.00797	5.50196e-33	1.4623e-31	up
CIL1018S0021	11	30	0	129	26	121	0.29	0.75	0	3.91	0.79	3.66	0.346667	2.78667	3.00692	0.000807688	0.00175914	up
CIL0090S0015	22	27	22	285	60	126	1.05	1.3	1.04	16.45	3.51	7.26	1.13	9.07333	3.00531	1.75461e-11	1.02377e-10	up
CIL1266S0048	3	17	35	212	83	66	0.19	1.08	2.18	16.2	6.43	5.03	1.15	9.22	3.00313	2.3876e-06	7.61076e-06	up
CIL0884S0001	13	7	16	71	61	108	1.37	0.75	1.63	8.89	7.73	13.38	1.25	10	3	1.34456e-17	1.36664e-16	up
CIL1461S0022	179	146	266	908	2550	390	7.84	6.45	11.48	48.06	136.91	20.6	8.59	68.5233	2.99587	5.48155e-08	2.16734e-07	up
CIL1567S0016	11	12	14	59	159	27	1.17	1.37	1.55	7.75	21.31	3.54	1.36333	10.8667	2.9947	3.22729e-07	1.15403e-06	up
CIL1187S0015	234	212	275	2255	1239	1212	13.32	12.17	15.44	155.23	86.51	83.25	13.6433	108.33	2.98916	3.51958e-39	1.32405e-37	up
CIL1078S0105	951	1078	875	5266	7301	6383	36.81	42.08	33.4	246.45	346.59	298.08	37.43	297.04	2.98839	2.61879e-40	1.04618e-38	up
CIL1539S0037	120	106	165	761	959	825	5.23	4.66	7.09	40.08	51.23	43.36	5.66	44.89	2.98752	1.25626e-36	4.12472e-35	up
CIL1338S0016	5	20	8	146	42	28	0.14	0.57	0.22	4.97	1.45	0.95	0.31	2.45667	2.98636	3.06812e-06	9.64304e-06	up
CIL1443S0020	24	14	24	174	107	122	3.57	2.1	3.52	31.32	19.53	21.91	3.06333	24.2533	2.98501	1.39858e-28	2.98291e-27	up
CIL1276S0002	18	10	2	52	59	85	2.78	1.56	0.3	9.71	11.18	15.84	1.54667	12.2433	2.98476	9.41322e-09	4.0739e-08	up
CIL0893S0298	133	119	108	931	494	923	5.86	5.29	4.69	49.59	26.69	49.06	5.28	41.78	2.9842	1.37276e-45	7.01521e-44	up
CIL1295S0072	1	0	4	0	23	14	0.2	0	0.64	0	4.15	2.47	0.28	2.20667	2.97837	0.0156723	0.0267727	up
CIL1039S0001	162	105	231	1411	919	885	10.33	6.76	14.51	108.58	71.76	68	10.5333	82.78	2.97432	2.98233e-27	5.92494e-26	up
CIL0893S0364	145	113	165	557	1545	616	9.69	7.62	10.88	45.02	126.66	49.68	9.39667	73.7867	2.97314	9.29479e-13	6.14265e-12	up
CIL0010S0038	231	163	180	1862	775	1073	7.22	5.14	5.55	70.37	29.71	40.47	5.97	46.85	2.97225	1.15415e-29	2.60816e-28	up
CIL0938S0023	147	108	200	882	854	1190	11.87	8.79	15.92	86.1	84.56	115.92	12.1933	95.5267	2.96981	1.53864e-36	4.97591e-35	up
CIL0909S0048	19	14	23	156	96	108	1.85	1.37	2.21	18.36	11.46	12.69	1.81	14.17	2.96878	7.20668e-28	1.48786e-26	up
CIL0919S0162	69	55	59	491	325	362	4.25	3.42	3.59	36.59	24.56	26.92	3.75333	29.3567	2.96744	2.88646e-59	2.77951e-57	up
CIL0982S0027	47	50	37	394	169	300	1.55	1.66	1.2	15.7	6.83	11.93	1.47	11.4867	2.96607	9.24373e-28	1.89629e-26	up
CIL1444S0030	34	33	54	288	250	231	2.37	2.32	3.72	24.3	21.4	19.45	2.80333	21.7167	2.95359	6.77623e-37	2.24774e-35	up
CIL1018S0108	164	90	144	1338	517	680	19.26	10.66	16.67	189.97	74.46	96.34	15.53	120.257	2.95299	6.28513e-21	8.17131e-20	up
CIL1579S0022	24	19	19	121	76	199	0.44	0.35	0.34	2.67	1.7	4.38	0.376667	2.91667	2.95296	7.40063e-18	7.68873e-17	up
CIL0893S0429	783	1031	920	3862	8416	5083	31.39	41.68	36.37	187.2	413.8	245.86	36.48	282.287	2.95198	8.35001e-19	9.30435e-18	up
CIL1459S0035	162	197	176	1510	866	1024	5.05	6.2	5.41	56.94	33.12	38.53	5.55333	42.8633	2.94832	8.28877e-55	6.66381e-53	up
CIL1031S0022	1115	1318	1539	2390	16331	6335	18.39	21.93	25.04	47.67	330.41	126.09	21.7867	168.057	2.94743	4.33132e-08	1.73461e-07	up
CIL0422S0002	20	32	51	423	124	106	1.8	2.9	4.52	45.94	13.66	11.49	3.07333	23.6967	2.94681	2.70054e-09	1.24607e-08	up
CIL1086S0063	481	567	548	4152	3136	2816	21.84	25.96	24.54	227.94	174.64	154.27	24.1133	185.617	2.94442	2.98734e-65	3.63653e-63	up
CIL0993S0066	2	10	4	32	53	16	0.1	0.49	0.19	1.89	3.17	0.94	0.26	2	2.94342	4.35242e-06	1.33448e-05	up
CIL1078S0083	3035	2439	4451	9113	22789	30698	207.05	167.79	299.43	751.68	1906.72	2526.71	224.757	1728.37	2.94298	2.11352e-13	1.49353e-12	up
CIL1158S0043	492	635	503	8020	987	1283	17.21	22.4	17.35	339.25	42.35	54.16	18.9867	145.253	2.93551	5.64254e-07	1.95959e-06	up
CIL1294S0046	22	21	23	205	57	153	1.36	1.31	1.41	15.36	4.33	11.44	1.36	10.3767	2.93166	1.21825e-14	9.64991e-14	up
CIL0917S0066	1	1	0	3	8	2	0.08	0.08	0	0.28	0.75	0.19	0.0533333	0.406667	2.93074	0.012321	0.0215368	up
CIL1147S0066	6	6	4	79	5	17	0.37	0.37	0.24	5.81	0.37	1.25	0.326667	2.47667	2.92251	0.000224063	0.000535159	up
CIL1416S0067	5	2	1	43	1	6	0.31	0.13	0.06	3.26	0.08	0.45	0.166667	1.26333	2.9222	0.00698278	0.0128086	up
CIL1230S0025	213	289	226	1384	1827	1312	7.53	10.31	7.88	59.17	79.23	55.97	8.57333	64.79	2.91784	1.78065e-31	4.38903e-30	up
CIL1038S0060	117	95	138	461	1155	546	8.81	7.22	10.25	41.98	106.69	49.61	8.76	66.0933	2.9155	3.4871e-14	2.63673e-13	up
CIL0976S0078	218	146	244	364	2808	569	12.7	8.58	14.02	25.65	200.67	40	11.7667	88.7733	2.91542	1.76278e-06	5.72876e-06	up
CIL1153S0048	19	38	128	1020	6	122	0.34	0.68	2.23	21.78	0.13	2.6	1.08333	8.17	2.91486	0.0290099	0.0468468	up
CIL1280S0030	2	1	4	12	6	25	0.1	0.05	0.21	0.76	0.38	1.57	0.12	0.903333	2.91222	8.87419e-05	0.000225343	up
CIL1176S0063	22	17	17	147	89	110	1.64	1.28	1.25	13.29	8.16	9.92	1.39	10.4567	2.91127	1.93651e-29	4.31567e-28	up
CIL0379S0002	65	54	56	469	320	289	3.58	3	3.04	31.21	21.6	19.19	3.20667	24	2.90389	2.94526e-41	1.2319e-39	up
CIL1201S0016	808	796	825	8029	3532	3401	41.06	40.79	41.35	493.3	220.14	208.49	41.0667	307.31	2.90365	1.50339e-25	2.6943e-24	up
CIL1264S0066	92	96	97	359	932	456	8.2	8.63	8.52	38.69	101.87	49.03	8.45	63.1967	2.90283	2.86698e-14	2.18512e-13	up
CIL0440S0002	288	270	401	209	5132	497	12.95	12.24	17.78	11.36	283.02	26.96	14.3233	107.113	2.9027	0.00371779	0.0071966	up
CIL1078S0094	509	768	648	3477	6322	2003	25.59	38.93	32.12	211.31	389.73	121.47	32.2133	240.837	2.90233	6.56494e-13	4.40972e-12	up
CIL1203S0012	625	668	920	3359	5174	5014	55.56	59.88	80.65	361.04	564.1	537.77	65.3633	487.637	2.89925	5.05154e-29	1.09827e-27	up
CIL0893S0282	597	568	587	3438	3515	3794	21.81	20.92	21.15	151.85	157.48	167.22	21.2933	158.85	2.89919	3.53623e-101	1.16999e-98	up
CIL0978S0067	36	43	44	275	144	337	1.93	2.32	2.33	17.82	9.47	21.79	2.19333	16.36	2.89898	1.74742e-25	3.11435e-24	up
CIL1526S0040	447	726	581	3309	3389	4065	14.22	23.29	18.23	127.29	132.24	156.04	18.58	138.523	2.89831	1.99192e-40	8.00707e-39	up
CIL0908S0065	930	921	834	5820	4791	5815	12	11.99	10.61	90.81	75.83	90.54	11.5333	85.7267	2.89393	6.0383e-167	8.20159e-164	up
CIL1099S0060	14	15	27	279	44	19	1.56	1.69	2.97	37.58	6.01	2.55	2.07333	15.38	2.89103	7.56755e-05	0.000194382	up
CIL0480S0011	2729	2782	3028	14698	16738	20630	102.33	105.19	111.96	666.34	769.71	933.27	106.493	789.773	2.89068	2.65923e-60	2.64968e-58	up
MSTRG.7036	48	31	24	318	151	161	2.85	1.84	1.4	22.69	10.93	11.46	2.03	15.0267	2.88797	1.61568e-18	1.76677e-17	up
CIL1060S0068	71	55	61	326	390	420	6.33	4.94	5.36	35.13	42.63	45.16	5.54333	40.9733	2.88586	5.66861e-41	2.32946e-39	up
CIL1153S0052	21	14	20	218	40	75	1.8	1.21	1.69	22.65	4.22	7.78	1.56667	11.55	2.88212	1.00627e-08	4.34144e-08	up
CIL1131S0097	21	32	21	323	31	96	1.49	2.29	1.47	27.76	2.7	8.23	1.75	12.8967	2.88157	2.1916e-06	7.02417e-06	up
CIL1112S0069	3	0	0	5	8	5	0.6	0	0	1.22	1.98	1.22	0.2	1.47333	2.88101	0.00686258	0.012607	up
MSTRG.13473	10	28	74	536	20	121	1.6	4.51	11.66	103.57	3.92	23.33	5.92333	43.6067	2.88007	0.000652845	0.00144432	up
CIL1153S0041	3	2	4	20	10	24	0.28	0.19	0.37	2.28	1.16	2.73	0.28	2.05667	2.87681	7.1322e-07	2.44242e-06	up
CIL1534S0030	229	290	192	1919	879	1496	8.98	11.47	7.43	91.02	42.29	70.81	9.29333	68.04	2.87212	4.22374e-31	1.02735e-29	up
CIL0923S0261	13	9	6	23	114	31	0.64	0.44	0.29	1.36	6.84	1.83	0.456667	3.34333	2.87207	4.98447e-06	1.51656e-05	up
CIL1245S0022	7	7	3	42	22	39	0.49	0.49	0.21	3.54	1.88	3.28	0.396667	2.9	2.87005	5.48482e-11	3.03163e-10	up
CIL1578S0017	1846	1519	2399	3506	21531	9401	49.61	41.16	63.57	113.91	709.58	304.79	51.4467	376.093	2.86994	2.74208e-08	1.12307e-07	up
MSTRG.19256	92	76	91	828	315	409	2.02	1.68	1.97	22	8.49	10.85	1.89	13.78	2.86612	9.76522e-23	1.44668e-21	up
CIL1082S0022	92	88	97	383	601	675	4.2	4.05	4.37	21.14	33.64	37.17	4.20667	30.65	2.86514	2.55908e-27	5.09978e-26	up
CIL1246S0095	1	0	1	6	4	2	0.09	0	0.09	0.65	0.44	0.22	0.06	0.436667	2.8635	0.0131466	0.0228545	up
CIL1075S0039	6	7	13	37	42	76	0.37	0.43	0.79	2.75	3.17	5.64	0.53	3.85333	2.86204	3.37775e-11	1.91371e-10	up
CIL1171S0003	2	3	6	44	9	12	0.09	0.14	0.27	2.45	0.51	0.67	0.166667	1.21	2.85997	5.54029e-05	0.000145481	up
CIL1543S0021	15	9	2	37	18	101	0.41	0.25	0.05	1.21	0.6	3.34	0.236667	1.71667	2.85868	2.35572e-05	6.51457e-05	up
CIL0411S0007	1364	957	1014	4497	7527	7796	151.91	107.5	111.39	605.73	1028.42	1047.86	123.6	894.003	2.8546	1.92787e-25	3.42413e-24	up
CIL0957S0066	634	1016	925	6285	5874	3139	25.16	40.65	36.19	301.52	285.85	150.27	34	245.88	2.85435	6.0121e-21	7.83607e-20	up
CIL0049S0020	114	122	111	1233	456	376	3.86	4.16	3.7	50.46	18.93	15.35	3.90667	28.2467	2.85407	6.06078e-15	4.95284e-14	up
CIL1256S0040	39	33	43	276	169	239	1.59	1.36	1.73	13.61	8.44	11.78	1.56	11.2767	2.85372	1.24856e-45	6.4059e-44	up
CIL1184S0001	4	6	4	28	20	35	0.34	0.52	0.34	2.92	2.11	3.64	0.4	2.89	2.853	3.96408e-10	2.00669e-09	up
CIL0897S0168	90	112	92	359	734	653	3.74	4.69	3.77	18.03	37.38	32.72	4.06667	29.3767	2.85275	3.02356e-19	3.48811e-18	up
CIL1411S0012	33	38	48	267	145	296	1.19	1.38	1.7	11.6	6.39	12.84	1.42333	10.2767	2.85203	6.33355e-28	1.31074e-26	up
CIL1219S0057	0	2	1	15	1	2	0	0.09	0.05	0.84	0.06	0.11	0.0466667	0.336667	2.85086	0.0254757	0.0416188	up
CIL1181S0005	228	303	116	2508	299	1033	6.49	8.71	3.25	86.41	10.46	35.51	6.15	44.1267	2.84299	2.93084e-07	1.05284e-06	up
CIL1446S0046	2	9	11	108	5	16	0.1	0.45	0.54	6.54	0.31	0.97	0.363333	2.60667	2.84284	0.00161777	0.00334373	up
CIL0948S0019	8	15	14	81	26	112	0.26	0.49	0.45	3.18	1.03	4.39	0.4	2.86667	2.8413	2.99859e-09	1.37475e-08	up
CIL1420S0021	142	192	154	1397	711	766	5.73	7.81	6.12	68.11	35.16	37.27	6.55333	46.8467	2.83765	1.14074e-30	2.72332e-29	up
CIL1095S0027	8	1	3	26	26	18	0.5	0.06	0.19	1.98	2.01	1.37	0.25	1.78667	2.83727	7.95453e-07	2.705e-06	up
CIL0899S0005	631	676	446	5043	2834	2444	32.3	34.9	22.51	312.13	177.92	150.95	29.9033	213.667	2.83698	6.69506e-26	1.22626e-24	up
CIL0893S0192	16	11	7	64	73	62	0.25	0.17	0.11	1.21	1.4	1.17	0.176667	1.26	2.83432	3.90097e-16	3.51878e-15	up
CIL0923S0083	190	178	258	1350	892	1429	5.74	5.42	7.68	49.27	33.02	52.04	6.28	44.7767	2.83391	4.32014e-53	3.19455e-51	up
CIL1095S0001	1	0	1	8	2	2	0.04	0	0.04	0.38	0.1	0.09	0.0266667	0.19	2.83289	0.0196315	0.0328447	up
CIL1308S0023	26	30	36	347	52	138	0.65	0.76	0.89	10.56	1.61	4.19	0.766667	5.45333	2.83047	1.5285e-08	6.44962e-08	up
CIL0978S0055	39	57	35	241	398	127	1.74	2.56	1.54	12.98	21.74	6.82	1.94667	13.8467	2.83046	3.18564e-11	1.81163e-10	up
CIL1090S0053	1137	1026	1254	5366	6146	8457	68.91	62.71	74.95	393.22	456.84	618.4	68.8567	489.487	2.8296	3.74747e-45	1.87425e-43	up
CIL1516S0016	1049	1075	1355	13396	2862	4089	33.07	34.18	42.13	510.64	110.66	155.53	36.46	258.943	2.82825	3.13495e-11	1.78399e-10	up
CIL1326S0032	207	225	284	2016	903	1263	9.57	10.49	12.95	112.74	51.22	70.48	11.0033	78.1467	2.82824	1.61675e-32	4.20176e-31	up
CIL0996S0003	4	0	2	10	9	16	0.37	0	0.18	1.11	1.01	1.77	0.183333	1.29667	2.82227	0.000121778	0.000302854	up
CIL0925S0070	5	0	0	16	6	7	1.09	0	0	4.23	1.61	1.85	0.363333	2.56333	2.81866	0.00669284	0.0123162	up
CIL1104S0028	426	436	531	2314	3921	1818	10.78	11.13	13.25	70.8	121.7	55.51	11.72	82.67	2.81839	2.54835e-18	2.75745e-17	up
CIL0978S0168	6	8	7	87	10	26	0.35	0.47	0.4	6.07	0.71	1.81	0.406667	2.86333	2.81578	1.55834e-05	4.4213e-05	up
CIL1320S0014	63	46	40	298	221	345	2.53	1.87	1.59	14.49	10.9	16.74	1.99667	14.0433	2.81422	2.70979e-38	9.6858e-37	up
CIL0149S0014	538	577	633	2068	4212	3781	25.05	27.09	29.06	116.44	240.53	212.41	27.0667	189.793	2.80984	4.1614e-21	5.49326e-20	up
CIL0010S0017	83	127	146	996	245	817	2.38	3.67	4.12	34.46	8.6	28.21	3.39	23.7567	2.80898	9.0056e-13	5.96529e-12	up
CIL0970S0157	60	53	72	810	72	186	6.27	5.59	7.42	102.38	9.23	23.46	6.42667	45.0233	2.80853	3.1817e-06	9.96967e-06	up
CIL1400S0016	0	3	8	36	16	11	0	0.33	0.85	4.7	2.12	1.43	0.393333	2.75	2.80561	0.00031249	0.000729945	up
CIL1596S0016	2	6	3	22	15	26	0.07	0.22	0.11	0.97	0.67	1.15	0.133333	0.93	2.80219	1.01019e-07	3.85138e-07	up
CIL1235S0050	5	5	4	48	8	24	0.38	0.39	0.3	4.47	0.76	2.23	0.356667	2.48667	2.80156	5.8674e-06	1.76934e-05	up
CIL1134S0096	12	5	0	26	46	26	0.55	0.23	0	1.43	2.57	1.43	0.26	1.81	2.79941	0.000100905	0.000254054	up
CIL1092S0075	224	163	185	864	980	1424	6.28	4.61	5.12	29.29	33.7	48.18	5.33667	37.0567	2.79572	8.65194e-35	2.54596e-33	up
CIL0465S0012	1593	1947	1324	9909	5888	12051	56.39	69.5	46.21	424.07	255.6	514.64	57.3667	398.103	2.79486	1.92612e-32	4.97073e-31	up
CIL0919S0098	105	121	114	985	225	737	3.66	4.25	3.91	41.46	9.61	30.95	3.94	27.34	2.79475	1.47461e-13	1.05592e-12	up
CIL0148S0002	26	39	18	357	60	59	1.37	2.08	0.94	22.8	3.89	3.76	1.46333	10.15	2.79415	3.58788e-06	1.11369e-05	up
CIL0940S0038	355	275	392	1026	2608	2169	23.66	18.48	25.76	82.68	213.19	174.42	22.6333	156.763	2.79207	1.36755e-15	1.18391e-14	up
MSTRG.6829	8	7	10	57	37	48	0.44	0.39	0.54	3.78	2.49	3.18	0.456667	3.15	2.78614	2.95359e-16	2.68298e-15	up
CIL1216S0045	200	253	282	2229	594	1350	4.37	5.57	6.07	58.84	15.91	35.56	5.33667	36.77	2.78452	5.72517e-16	5.10361e-15	up
CIL1162S0046	98	68	90	355	456	638	4.43	3.1	4.01	19.41	25.29	34.81	3.84667	26.5033	2.78449	1.31078e-26	2.51318e-25	up
CIL1459S0036	55	57	50	425	254	237	5.16	5.39	4.63	48.21	29.22	26.83	5.06	34.7533	2.77994	1.57109e-31	3.88364e-30	up
CIL1311S0001	4	2	0	12	7	16	0.73	0.38	0	2.52	1.59	3.51	0.37	2.54	2.77923	0.000177592	0.000431513	up
CIL1277S0052	31	13	10	148	88	69	1.77	0.75	0.56	10.21	6.16	4.75	1.02667	7.04	2.77761	3.78462e-11	2.13672e-10	up
CIL1520S0039	23	17	16	93	128	93	1.97	1.47	1.35	9.65	13.47	9.63	1.59667	10.9167	2.7734	1.20878e-18	1.33655e-17	up
CIL0909S0148	155	141	193	1159	952	633	10.18	9.33	12.49	91.99	76.64	50.13	10.6667	72.92	2.77321	2.25926e-29	5.00901e-28	up
CIL1295S0020	164	177	164	1153	670	1005	6.19	6.73	6.1	52.58	30.99	45.74	6.34	43.1033	2.76524	2.56223e-65	3.14874e-63	up
CIL1001S0101	49	45	49	238	218	344	2.74	2.53	2.7	16.07	14.93	23.17	2.65667	18.0567	2.76484	1.17032e-36	3.85235e-35	up
CIL1031S0040	10	43	33	213	125	146	0.28	1.19	0.89	7.03	4.17	4.83	0.786667	5.34333	2.76392	1.72329e-11	1.00686e-10	up
CIL1018S0124	2	16	19	91	34	80	0.07	0.6	0.7	4.11	1.56	3.61	0.456667	3.09333	2.75995	1.10181e-06	3.67891e-06	up
CIL1021S0089	20	22	25	218	72	83	0.87	0.96	1.07	11.44	3.83	4.35	0.966667	6.54	2.7582	1.23838e-12	8.07452e-12	up
CIL1434S0040	637	573	622	4647	2629	2918	22.86	20.74	22.01	201.65	115.72	126.35	21.87	147.907	2.75766	4.00803e-54	3.09687e-52	up
CIL1384S0009	4	17	9	129	23	17	0.09	0.4	0.21	3.61	0.65	0.47	0.233333	1.57667	2.75641	0.000134046	0.000331606	up
CIL0937S0097	487	459	466	3407	2745	1685	23.79	22.61	22.45	201.24	164.46	99.31	22.95	155.003	2.75573	1.68233e-28	3.57331e-27	up
CIL1512S0036	653	657	699	1794	5795	3534	27.46	27.86	28.99	91.22	298.89	179.31	28.1033	189.807	2.75572	1.18857e-12	7.75952e-12	up
MSTRG.24741	21	33	24	94	216	125	0.5	0.79	0.56	2.68	6.26	3.55	0.616667	4.16333	2.75518	3.07615e-12	1.92474e-11	up
CIL0893S0356	23	26	19	102	169	104	1.32	1.5	1.07	7.07	11.89	7.2	1.29667	8.72	2.74952	8.39239e-16	7.40453e-15	up
CIL1271S0030	167	122	165	686	845	972	20.37	15	19.84	101.16	126.39	143.02	18.4033	123.523	2.74674	1.49976e-37	5.14684e-36	up
CIL1122S0041	422	437	424	2215	2362	2504	19.78	20.66	19.6	125.54	135.79	141.62	20.0133	134.317	2.7466	2.17345e-75	3.57263e-73	up
CIL1196S0047	98	116	116	814	535	472	3.18	3.8	3.72	31.97	21.31	18.5	3.56667	23.9267	2.74597	1.6416e-37	5.59641e-36	up
CIL1403S0033	9	2	6	7	40	46	1.04	0.23	0.68	0.98	5.66	6.4	0.65	4.34667	2.7414	8.55203e-05	0.000217784	up
CIL0895S0209	56	61	78	599	188	287	3.32	3.65	4.56	42.92	13.66	20.52	3.84333	25.7	2.74134	4.91546e-16	4.40769e-15	up
MSTRG.19163	156	78	103	340	864	647	5.84	2.93	3.81	15.35	39.56	29.15	4.19333	28.02	2.74029	7.35749e-13	4.92414e-12	up
CIL0286S0008	14	13	16	95	87	54	1.05	0.99	1.19	8.64	8.03	4.9	1.07667	7.19	2.73942	2.22496e-16	2.04413e-15	up
CIL0962S0005	1	0	1	4	6	1	0.08	0	0.07	0.36	0.55	0.09	0.05	0.333333	2.73697	0.0236621	0.0389195	up
CIL0925S0004	330	301	399	1477	2556	1597	23.49	21.59	27.97	126.94	222.82	136.96	24.35	162.24	2.73614	1.23504e-21	1.70442e-20	up
CIL1133S0030	216	223	223	916	1543	1158	6.27	6.53	6.39	32.16	54.95	40.57	6.39667	42.56	2.73411	1.85619e-25	3.29909e-24	up
CIL1554S0004	187	159	236	902	1447	806	8.8	7.55	10.95	51.33	83.53	45.77	9.1	60.21	2.72606	1.10738e-19	1.31879e-18	up
CIL1084S0001	119	70	99	133	1240	176	11.36	6.71	9.28	15.35	144.67	20.19	9.11667	60.07	2.72007	3.58502e-05	9.67162e-05	up
CIL1112S0070	164	172	130	540	1198	779	3.98	4.19	3.09	15.82	35.57	22.75	3.75333	24.7133	2.71905	3.99496e-16	3.60104e-15	up
CIL1417S0108	42	35	81	525	150	179	2.11	1.78	4.02	31.95	9.26	10.87	2.63667	17.36	2.71898	6.21387e-10	3.075e-09	up
CIL1113S0026	13	12	11	105	46	43	0.49	0.46	0.41	4.83	2.15	1.97	0.453333	2.98333	2.71828	4.55869e-12	2.80912e-11	up
CIL0908S0094	299	306	211	1872	742	1811	7.48	7.72	5.21	56.64	22.77	54.68	6.80333	44.6967	2.71585	2.63866e-21	3.52829e-20	up
CIL0940S0071	0	2	7	33	6	5	0	0.12	0.48	2.91	0.54	0.48	0.2	1.31	2.71149	0.00877312	0.0157974	up
CIL1130S0020	14	11	16	91	61	68	1.28	1.01	1.44	10.04	6.83	7.48	1.24333	8.11667	2.70667	1.49122e-21	2.04484e-20	up
CIL1333S0010	5	1	0	8	6	19	0.16	0.03	0	0.3	0.23	0.71	0.0633333	0.413333	2.70627	0.00198982	0.00404978	up
CIL1277S0018	276	357	268	2597	703	1547	6.38	8.32	6.11	72.54	19.92	43.12	6.93667	45.1933	2.7038	1.81269e-15	1.55623e-14	up
CIL1131S0016	0	4	7	27	1	31	0	0.32	0.54	2.56	0.1	2.94	0.286667	1.86667	2.70302	0.0107605	0.019045	up
CIL1147S0103	19	19	13	130	22	123	0.97	0.98	0.65	8	1.37	7.56	0.866667	5.64333	2.703	1.30747e-07	4.91006e-07	up
MSTRG.4389	9446	8265	8650	37735	51555	52295	861.22	761.33	778.65	4149.1	5747.31	5735.01	800.4	5210.47	2.70262	2.02148e-40	8.11328e-39	up
CIL1436S0053	51	34	48	138	382	187	11.36	7.64	10.55	37.18	104.39	50.27	9.85	63.9467	2.69867	4.0826e-11	2.29792e-10	up
MSTRG.28831	2	1	0	4	6	6	0.51	0.26	0	1.24	1.89	1.86	0.256667	1.66333	2.69611	0.00482169	0.0091287	up
CIL0929S0107	21	12	18	120	53	97	1.76	1.02	1.49	12.18	5.46	9.83	1.42333	9.15667	2.68555	5.26299e-17	5.08125e-16	up
MSTRG.6786	2	4	12	34	19	45	0.1	0.18	0.49	1.71	0.96	2.28	0.256667	1.65	2.6845	7.81425e-07	2.65975e-06	up
CIL1242S0044	241	217	275	1764	1115	993	10.08	9.15	11.34	89.21	57.2	50.11	10.19	65.5067	2.68449	4.11882e-38	1.4621e-36	up
CIL1266S0030	96	103	147	437	789	594	5.31	5.74	8.02	29.22	53.52	39.63	6.35667	40.79	2.68187	5.67751e-19	6.40382e-18	up
CIL0940S0128	0	2	2	8	8	5	0	0.19	0.18	0.9	0.91	0.56	0.123333	0.79	2.67929	0.00161616	0.00334067	up
CIL1075S0005	520	411	504	2564	2468	2495	32.45	25.86	31.01	193.45	188.88	187.85	29.7733	190.06	2.67436	1.91723e-80	3.61153e-78	up
CIL1006S0086	18	10	22	119	106	36	1.14	0.64	1.38	9.13	8.25	2.76	1.05333	6.71333	2.67207	7.48765e-09	3.27904e-08	up
CIL1055S0113	143	128	162	1180	553	532	3.8	3.43	4.25	37.96	18.04	17.08	3.82667	24.36	2.67035	7.13159e-23	1.06693e-21	up
CIL0978S0059	37	56	41	237	56	412	0.95	1.45	1.04	7.36	1.76	12.77	1.14667	7.29667	2.66979	1.28136e-07	4.81902e-07	up
CIL1508S0011	155	169	188	1232	820	625	4.29	4.72	5.13	41.24	27.84	20.88	4.71333	29.9867	2.6695	1.38609e-29	3.11863e-28	up
CIL0970S0037	83	68	84	429	351	449	5.24	4.33	5.23	32.72	27.16	34.16	4.93333	31.3467	2.66768	1.18178e-71	1.80463e-69	up
CIL0310S0021	45	56	46	516	70	183	3.02	3.79	3.04	41.86	5.76	14.82	3.28333	20.8133	2.66427	1.34985e-07	5.05524e-07	up
CIL0990S0162	4	2	6	17	32	13	0.28	0.14	0.41	1.43	2.74	1.09	0.276667	1.75333	2.66388	7.58866e-06	2.2482e-05	up
CIL0914S0154	450	643	480	3109	2181	2904	6.2	8.93	6.52	51.79	36.85	48.27	7.21667	45.6367	2.66079	4.30514e-51	2.83425e-49	up
CIL1006S0069	68	84	86	645	149	446	2.2	2.74	2.75	25.26	5.92	17.43	2.56333	16.2033	2.6602	1.95923e-12	1.25091e-11	up
CIL1456S0030	3	4	4	19	15	23	0.41	0.55	0.54	3.15	2.52	3.8	0.5	3.15667	2.6584	9.72462e-08	3.71908e-07	up
CIL1015S0081	106	101	92	463	584	505	9.79	9.4	8.38	51.68	66.12	56.25	9.19	58.0167	2.65833	3.12572e-36	9.92194e-35	up
CIL0935S0010	821	770	874	4767	3069	4955	26.37	24.91	27.65	184.97	120.8	191.87	26.31	165.88	2.65646	3.92392e-80	7.28523e-78	up
CIL1131S0068	254	251	278	1404	1269	1385	10.11	10.07	10.91	67.55	61.93	66.49	10.3633	65.3233	2.65611	1.13015e-110	4.78125e-108	up
CIL1551S0002	8	9	7	91	17	17	0.34	0.39	0.3	4.71	0.89	0.88	0.343333	2.16	2.65335	2.04027e-05	5.69717e-05	up
CIL1031S0150	2137	2220	2166	9648	15308	8721	59	61.81	58.97	322.05	518.32	290.49	59.9267	376.953	2.65312	3.31786e-22	4.73584e-21	up
CIL1499S0035	30	26	29	199	97	145	0.99	0.87	0.95	7.95	3.93	5.78	0.936667	5.88667	2.65184	6.40849e-26	1.17627e-24	up
CIL0377S0003	12	1	8	41	39	28	3.34	0.28	2.19	13.78	13.3	9.39	1.93667	12.1567	2.6501	5.47421e-07	1.90466e-06	up
CIL1446S0006	879	1047	1033	5087	5179	4988	24.7	29.67	28.62	172.83	178.48	169.1	27.6633	173.47	2.64864	6.86031e-66	8.67862e-64	up
CIL1407S0018	1933	1524	2567	9577	15835	5486	100.51	79.91	131.62	602.07	1009.77	344.15	104.013	651.997	2.6481	1.88572e-12	1.20487e-11	up
MSTRG.25832	15	13	28	105	87	113	0.39	0.3	0.54	2.63	2.32	2.74	0.41	2.56333	2.64433	1.72244e-21	2.34694e-20	up
CIL0123S0013	0	0	3	8	3	4	0	0	0.24	0.8	0.3	0.4	0.08	0.5	2.64386	0.0206861	0.0344418	up
CIL0908S0044	65	58	76	433	239	351	3.06	2.76	3.57	24.77	13.85	20.05	3.13	19.5567	2.64343	2.52279e-41	1.06208e-39	up
CIL1578S0012	638	514	670	1260	6194	1849	30.61	24.87	31.7	73.09	364.45	107.03	29.06	181.523	2.64305	1.17837e-07	4.45376e-07	up
CIL0982S0010	196	174	225	641	1278	1125	24.68	22.1	27.94	97.6	197.39	170.94	24.9067	155.31	2.64055	4.91406e-19	5.5646e-18	up
CIL0902S0150	29	35	44	288	114	152	0.65	0.79	0.98	7.83	3.14	4.12	0.806667	5.03	2.64051	2.81043e-17	2.77669e-16	up
CIL0951S0068	12	4	3	77	10	13	0.35	0.12	0.09	2.69	0.35	0.45	0.186667	1.16333	2.63973	0.000509204	0.00114789	up
MSTRG.2703	259	278	315	1660	1597	1101	8	8.66	9.6	62.01	60.51	41.04	8.75333	54.52	2.63888	1.03062e-34	3.01556e-33	up
CIL1444S0031	275	232	366	1701	1484	1273	8.67	7.37	11.37	64.81	57.35	48.4	9.13667	56.8533	2.63751	1.2508e-39	4.83226e-38	up
CIL0207S0011	882	802	700	3299	5468	3406	78.31	71.8	61.28	354.13	595.39	364.84	70.4633	438.12	2.63638	1.14498e-21	1.58267e-20	up
CIL1162S0041	99	71	115	333	489	628	7.2	5.21	8.25	29.28	43.61	55.1	6.88667	42.6633	2.63112	9.46898e-21	1.21515e-19	up
CIL1469S0006	14	6	8	35	76	31	0.8	0.34	0.45	2.41	5.3	2.13	0.53	3.28	2.62963	1.3877e-07	5.18869e-07	up
CIL0622S0001	9	9	22	103	53	47	0.64	0.64	1.53	8.79	4.59	4	0.936667	5.79333	2.62879	2.85327e-10	1.46562e-09	up
CIL1546S0001	22	35	27	115	188	124	2.11	3.39	2.56	13.35	22.14	14.36	2.68667	16.6167	2.62874	2.24096e-15	1.90929e-14	up
CIL1568S0010	290	279	271	1304	1667	1281	14.3	13.87	13.18	77.73	100.8	76.2	13.7833	84.91	2.62301	2.64981e-36	8.46331e-35	up
CIL1229S0042	13	29	10	112	53	100	0.93	2.08	0.7	9.64	4.63	8.58	1.23667	7.61667	2.6227	4.86245e-11	2.70851e-10	up
CIL0922S0047	66	64	112	530	269	425	3.36	3.29	5.63	32.66	16.81	26.13	4.09333	25.2	2.62208	1.9449e-24	3.24868e-23	up
CIL1094S0023	120	119	134	1019	328	543	5.54	5.54	6.1	56.91	18.58	30.26	5.72667	35.25	2.62186	4.04191e-18	4.30143e-17	up
CIL1551S0025	0	3	0	6	3	6	0	0.2	0	0.49	0.25	0.49	0.0666667	0.41	2.62059	0.019079	0.0320201	up
CIL1216S0018	1008	1109	935	9762	1941	3777	30.31	33.63	27.72	354.89	71.58	137.02	30.5533	187.83	2.62003	1.22979e-10	6.54781e-10	up
CIL1319S0022	70	52	47	317	254	281	3.84	2.88	2.54	21.05	17.11	18.62	3.08667	18.9267	2.6163	1.89536e-45	9.64763e-44	up
CIL0987S0157	9118	9459	10810	31723	67571	48463	270.31	282.78	316.01	1137.05	2456.7	1733.35	289.7	1775.7	2.61576	4.66349e-18	4.92836e-17	up
CIL0929S0096	158	219	270	2027	617	617	4.99	6.97	8.4	77.34	23.88	23.49	6.78667	41.57	2.61477	4.01387e-11	2.26121e-10	up
CIL1434S0044	4937	4240	4350	20257	25845	21876	174.57	151.19	151.68	866.04	1120.8	933.26	159.147	973.367	2.61263	1.04231e-41	4.44611e-40	up
CIL0909S0224	89	82	93	823	141	366	3.96	3.68	4.08	44.31	7.7	19.67	3.90667	23.8933	2.6126	1.80058e-09	8.47175e-09	up
CIL1607S0023	3	0	4	23	3	9	0.11	0	0.15	1.04	0.14	0.41	0.0866667	0.53	2.61244	0.00383796	0.00740588	up
CIL0979S0048	12	24	14	134	48	70	0.56	1.14	0.65	7.62	2.77	3.97	0.783333	4.78667	2.61132	4.44085e-11	2.48493e-10	up
MSTRG.14496	174	369	217	1004	1741	1092	5.18	10.88	6.17	35.06	62.19	38.33	7.41	45.1933	2.60856	8.28977e-14	6.06733e-13	up
MSTRG.21130	3	6	2	20	17	18	0.28	0.57	0.19	2.29	1.98	2.06	0.346667	2.11	2.60562	4.65406e-07	1.63323e-06	up
CIL1114S0043	1117	1465	1120	5535	8166	4773	35.07	46.39	34.68	210.13	314.46	180.81	38.7133	235.133	2.60258	8.04142e-21	1.03607e-19	up
CIL1543S0005	8	10	20	56	95	38	0.4	0.5	1	3.39	5.84	2.29	0.633333	3.84	2.60007	2.98535e-08	1.21749e-07	up
CIL0242S0006	1	7	2	27	5	18	0.05	0.36	0.1	1.67	0.31	1.11	0.17	1.03	2.59904	0.000626608	0.00139033	up
CIL1403S0032	4	1	0	1	15	9	0.84	0.21	0	0.25	3.84	2.27	0.35	2.12	2.59864	0.0158287	0.0270165	up
CIL0922S0042	180	239	241	1818	669	801	6.33	8.48	8.36	77.33	28.87	34	7.72333	46.7333	2.59716	2.76904e-17	2.73795e-16	up
CIL0001S0053	2	3	5	13	20	16	0.21	0.32	0.52	1.67	2.6	2.05	0.35	2.10667	2.58954	3.85898e-06	1.19311e-05	up
CIL1093S0060	109	105	155	832	321	673	5.31	5.15	7.44	48.97	19.17	39.53	5.96667	35.89	2.58858	7.8555e-21	1.01313e-19	up
CIL0990S0062	38	17	62	378	35	165	3.23	1.46	5.2	38.84	3.65	16.92	3.29667	19.8033	2.58666	2.92024e-05	7.97065e-05	up
CIL1371S0108	8	8	12	55	41	42	0.79	0.79	1.16	6.53	4.94	4.98	0.913333	5.48333	2.58584	7.51196e-15	6.08478e-14	up
CIL0131S0031	385	371	328	2312	830	2205	17.25	16.76	14.49	125.21	45.6	119.16	16.1667	96.6567	2.57985	8.71964e-20	1.0447e-18	up
CIL0922S0025	73	53	54	217	299	369	7.49	5.48	5.46	26.9	37.6	45.65	6.14333	36.7167	2.57934	1.1351e-22	1.67296e-21	up
CIL0090S0007	9	20	19	155	30	51	1.15	2.58	2.4	23.99	4.71	7.88	2.04333	12.1933	2.5771	1.1666e-06	3.8797e-06	up
CIL1132S0014	220	233	241	1521	948	935	8.24	8.8	8.9	68.88	43.55	42.25	8.64667	51.56	2.57604	3.65407e-45	1.83464e-43	up
CIL1127S0040	2260	2443	2301	5700	20121	8381	75.72	82.54	76.02	230.89	826.74	338.76	78.0933	465.463	2.5754	8.43703e-10	4.11908e-09	up
CIL1155S0024	35	27	34	381	25	64	1.71	1.33	1.64	22.57	1.5	3.78	1.56	9.28333	2.5731	0.000154592	0.000378768	up
MSTRG.26926	12	10	14	63	64	49	0.81	0.68	0.93	5.13	5.28	3.98	0.806667	4.79667	2.57199	6.46606e-16	5.74818e-15	up
CIL1524S0012	874	878	944	3295	6385	3464	51.89	52.56	55.26	236.51	464.88	248.11	53.2367	316.5	2.57171	4.2541e-17	4.13349e-16	up
MSTRG.2941	2	2	8	51	2	7	0.09	0.09	0.34	2.63	0.1	0.36	0.173333	1.03	2.57102	0.00776471	0.0141135	up
CIL0925S0071	312	300	326	1533	1436	1610	10.37	10.06	10.69	61.62	58.55	64.58	10.3733	61.5833	2.56966	6.92612e-103	2.38323e-100	up
CIL1600S0011	67	71	60	414	194	357	1.84	1.96	1.62	13.73	6.52	11.81	1.80667	10.6867	2.56441	2.13556e-28	4.51371e-27	up
CIL0212S0008	296	351	236	2119	1078	1103	8.25	9.86	6.48	71.38	36.84	37.08	8.19667	48.4333	2.56289	1.21083e-23	1.90789e-22	up
CIL1219S0011	1	1	1	1	13	1	0.07	0.07	0.07	0.08	1.08	0.08	0.07	0.413333	2.56188	0.0263412	0.0429159	up
CIL0895S0067	12	6	5	98	1	13	0.49	0.25	0.2	4.86	0.05	0.64	0.313333	1.85	2.56176	0.00928319	0.0166127	up
CIL1157S0082	9	8	9	44	37	45	0.53	0.47	0.52	3.12	2.66	3.19	0.506667	2.99	2.56104	8.96315e-15	7.20149e-14	up
CIL1264S0005	176	186	208	770	1010	980	5.77	6.15	6.73	30.54	40.64	38.79	6.21667	36.6567	2.55986	6.84984e-36	2.13495e-34	up
CIL0554S0007	11	13	18	140	4	60	0.75	0.9	1.21	11.57	0.34	4.95	0.953333	5.62	2.55952	0.000800651	0.00174484	up
CIL1057S0089	527	532	439	4093	1265	1920	28.73	29.25	23.6	269.82	84.59	126.3	27.1933	160.237	2.55888	4.76827e-16	4.28464e-15	up
CIL0009S0020	726	794	904	3653	4719	3303	16.8	18.53	20.63	102.21	133.93	92.22	18.6533	109.453	2.55281	3.90861e-30	9.08734e-29	up
CIL1471S0007	409	424	373	2264	1037	2533	13.08	13.68	11.77	87.57	40.69	97.77	12.8433	75.3433	2.55246	6.32856e-25	1.08808e-23	up
MSTRG.13735	14	13	9	78	71	25	0.52	0.48	0.33	3.47	3.21	1.11	0.443333	2.59667	2.5502	2.28722e-08	9.45179e-08	up
CIL0923S0066	31	18	17	199	28	89	0.67	0.39	0.36	5.23	0.75	2.33	0.473333	2.77	2.54896	1.3995e-06	4.60089e-06	up
CIL0953S0080	239	197	252	1601	592	1116	5.89	4.89	6.12	47.67	17.88	33.16	5.63333	32.9033	2.54617	8.27489e-23	1.23013e-21	up
CIL1053S0035	331	293	229	494	2449	1138	9.26	8.27	6.33	16.72	84.05	38.42	7.95333	46.3967	2.54439	7.00654e-08	2.7318e-07	up
CIL1525S0029	618	661	688	3438	2958	3031	17.56	18.94	19.28	118.14	103.1	103.93	18.5933	108.39	2.54337	4.39288e-107	1.69205e-104	up
CIL1363S0025	254	219	231	1597	668	1106	5.26	4.57	4.71	39.95	16.95	27.61	4.84667	28.17	2.53909	6.51345e-29	1.41017e-27	up
CIL1325S0041	205	229	282	677	1603	1131	9.77	11.01	13.26	39.03	93.74	65.06	11.3467	65.9433	2.53896	2.41786e-14	1.85266e-13	up
CIL0987S0068	20	22	23	284	4	22	0.48	0.53	0.54	8.23	0.12	0.64	0.516667	2.99667	2.53605	0.00622407	0.0115176	up
CIL1164S0025	63	55	111	424	324	340	4.76	4.19	8.26	38.69	29.99	30.96	5.73667	33.2133	2.53348	1.15976e-24	1.96757e-23	up
CIL0391S0010	262	304	299	2505	618	1001	12.63	14.78	14.23	146.01	36.56	58.24	13.88	80.27	2.53185	5.83777e-12	3.56327e-11	up
CIL1187S0094	2820	3284	3038	15650	14659	13135	198.62	233.25	211	1332.73	1266.26	1116.17	214.29	1238.39	2.53083	5.1357e-63	5.59228e-61	up
CIL1343S0034	1969	1613	1900	2245	19457	4154	121.13	100.07	115.26	166.99	1468.02	308.32	112.153	647.777	2.53002	1.6808e-05	4.74732e-05	up
CIL1119S0025	274	232	255	951	1500	1147	14.25	12.16	13.07	59.79	95.65	71.95	13.16	75.7967	2.52597	7.20614e-25	1.23567e-23	up
CIL0086S0017	344	521	557	1604	2700	2415	12.63	19.28	20.16	71.18	121.54	106.94	17.3567	99.8867	2.5248	6.26744e-19	7.05381e-18	up
CIL0919S0189	18	23	39	214	86	78	1.12	1.45	2.4	16.15	6.58	5.87	1.65667	9.53333	2.5247	2.58385e-10	1.33229e-09	up
MSTRG.7506	259	301	183	1507	214	1160	16.43	18.86	10.63	138.01	18.65	106.61	15.3067	87.7567	2.51935	1.7801e-06	5.77995e-06	up
CIL1290S0023	153	142	150	608	695	790	6.88	6.43	6.65	33.03	38.3	42.83	6.65333	38.0533	2.51587	8.71085e-46	4.51408e-44	up
MSTRG.26789	1116	379	295	356	6665	1341	110.2	37.74	28.73	42.5	807.17	159.76	58.89	336.477	2.51441	0.000587821	0.00131137	up
CIL1201S0052	223	261	178	1472	546	1102	5.32	6.27	4.18	42.43	15.96	31.7	5.25667	30.03	2.51418	1.83498e-19	2.15153e-18	up
CIL0942S0109	34	36	51	406	58	105	1.15	1.22	1.7	16.56	2.4	4.27	1.35667	7.74333	2.51289	2.04615e-06	6.58993e-06	up
CIL1239S0012	104	88	90	365	550	407	7.35	6.27	6.27	31.18	47.65	34.69	6.63	37.84	2.51283	1.88252e-23	2.92488e-22	up
CIL1396S0010	6	4	11	37	43	18	0.28	0.19	0.51	2.09	2.47	1.02	0.326667	1.86	2.50941	4.57037e-07	1.60604e-06	up
MSTRG.8638	36	28	44	99	245	160	2.81	2.2	3.39	9.31	23.44	15.06	2.8	15.9367	2.50885	2.35671e-11	1.35879e-10	up
CIL0407S0007	448	485	441	4615	531	1289	15.34	16.75	14.89	191.08	22.3	53.26	15.66	88.88	2.50477	1.38334e-06	4.55182e-06	up
MSTRG.18857	16	7	22	86	48	76	1.49	0.66	2.02	9.66	5.47	8.52	1.39	7.88333	2.50372	7.49909e-13	5.01241e-12	up
CIL0560S0001	412	477	583	4002	1106	1753	19.79	23.11	27.62	232.46	65.17	101.61	23.5067	133.08	2.50115	3.84549e-13	2.65245e-12	up
CIL1050S0078	263	244	244	1260	994	1239	12.68	11.86	11.6	73.44	58.77	72.07	12.0467	68.0933	2.49888	4.01114e-128	2.40734e-125	up
CIL1145S0162	525	674	705	1993	3494	3351	22.87	29.61	30.28	104.96	186.65	176.1	27.5867	155.903	2.49861	3.53489e-20	4.34197e-19	up
CIL0945S0035	10	13	6	45	33	62	0.34	0.47	0.22	1.86	1.39	2.57	0.343333	1.94	2.49837	9.78106e-12	5.84576e-11	up
CIL1464S0005	34	17	50	212	114	141	2.49	1.26	3.61	18.78	10.24	12.46	2.45333	13.8267	2.49464	4.54789e-14	3.40492e-13	up
CIL1184S0046	38	47	16	179	69	223	2.12	2.65	0.88	12.08	4.73	15.02	1.88333	10.61	2.49406	5.71011e-09	2.53546e-08	up
MSTRG.23046	18	13	14	24	126	58	1.73	1.28	1.34	2.81	14.93	6.75	1.45	8.16333	2.49311	3.50334e-06	1.08928e-05	up
CIL0912S0184	2	1	0	7	1	6	0.46	0.23	0	1.94	0.28	1.66	0.23	1.29333	2.49139	0.022577	0.0373227	up
CIL1068S0024	26	44	98	477	139	158	1.11	1.9	4.13	24.67	7.29	8.15	2.38	13.37	2.48997	4.53611e-07	1.59487e-06	up
CIL1587S0005	1476	1480	1535	7105	7116	6485	106.22	107.4	108.93	618.18	628.03	563.04	107.517	603.083	2.4878	5.20544e-71	7.81029e-69	up
CIL1126S0036	3	0	4	25	6	1	0.42	0	0.55	4.24	1.03	0.17	0.323333	1.81333	2.48755	0.0220127	0.0364505	up
CIL0957S0046	515	446	440	1365	3050	2032	22.49	19.64	18.95	72.07	163.34	107.05	20.36	114.153	2.48716	2.14061e-15	1.82863e-14	up
CIL1034S0036	151	149	140	621	697	709	5.18	5.15	4.73	25.75	29.32	29.34	5.02	28.1367	2.48669	6.61808e-48	3.71289e-46	up
CIL1139S0013	19	25	24	119	90	104	2.28	3.03	2.84	17.27	13.25	15.07	2.71667	15.1967	2.48385	4.86538e-28	1.00852e-26	up
MSTRG.10197	54	67	63	580	160	107	2.43	3.05	2.8	31.61	8.85	5.82	2.76	15.4267	2.48269	1.90261e-07	7.00137e-07	up
CIL1386S0019	349	428	379	2058	1199	2066	18.65	23.06	19.97	132.96	78.57	133.19	20.56	114.907	2.48255	2.56503e-44	1.23499e-42	up
MSTRG.13313	119	153	227	2023	87	185	7.97	10.33	14.99	163.81	7.15	14.95	11.0967	61.97	2.48144	0.00120588	0.00255229	up
MSTRG.12851	12	16	20	96	61	63	0.45	0.6	0.73	4.32	2.79	2.83	0.593333	3.31333	2.48137	2.24721e-17	2.2426e-16	up
MSTRG.10195	11	4	4	30	34	23	1.34	0.49	0.48	4.42	5.09	3.38	0.77	4.29667	2.48029	9.933e-08	3.7909e-07	up
CIL1086S0015	21	8	30	210	22	38	0.32	0.12	0.45	3.85	0.41	0.7	0.296667	1.65333	2.47846	0.000278422	0.000655349	up
CIL1189S0022	90	60	62	481	213	275	3.14	2.11	2.14	20.32	9.13	11.59	2.46333	13.68	2.47338	4.36545e-20	5.33172e-19	up
MSTRG.719	196	206	232	173	2382	313	7.72	8.18	9.01	8.24	115.06	14.87	8.30333	46.0567	2.47165	0.000262832	0.000621043	up
CIL1497S0021	68	64	76	274	208	467	4.15	3.94	4.58	20.24	15.58	34.42	4.22333	23.4133	2.47088	1.19395e-20	1.51934e-19	up
CIL1549S0011	7	8	12	88	9	26	0.42	0.48	0.7	6.33	0.66	1.87	0.533333	2.95333	2.46923	0.000134466	0.000332582	up
CIL0996S0066	342	561	349	3749	556	1421	24.24	40.09	24.39	321.21	48.32	121.49	29.5733	163.673	2.46845	2.37247e-07	8.63863e-07	up
CIL1145S0110	142	116	134	590	600	591	5.32	4.38	4.95	26.73	27.58	26.72	4.88333	27.01	2.46756	1.65629e-54	1.32334e-52	up
CIL0893S0264	37	54	33	262	160	143	3.5	5.16	3.08	30	18.58	16.34	3.91333	21.64	2.46723	1.32759e-18	1.46399e-17	up
CIL0349S0008	5	8	11	34	28	47	0.29	0.47	0.63	2.39	1.99	3.29	0.463333	2.55667	2.46414	1.69283e-10	8.88487e-10	up
CIL1120S0017	745	755	803	3379	2618	4444	12.52	12.79	13.31	68.65	53.95	90.1	12.8733	70.9	2.4614	9.74671e-52	6.67197e-50	up
CIL1384S0023	391	499	777	5485	760	1295	12.12	15.6	23.76	205.63	28.9	48.45	17.16	94.3267	2.45862	3.27915e-06	1.02489e-05	up
CIL1446S0042	3941	4961	5894	28246	18041	20485	127.59	161.97	188.18	1105.77	716.41	800.23	159.247	874.137	2.4566	1.20847e-41	5.1379e-40	up
CIL0984S0083	756	819	457	4780	522	3926	42.35	46.26	25.24	323.74	35.86	265.34	37.95	208.313	2.45658	3.28658e-06	1.02709e-05	up
CIL1469S0032	162	178	149	1053	352	807	7.06	7.82	6.4	55.49	18.82	42.44	7.09333	38.9167	2.45585	1.0277e-17	1.05623e-16	up
CIL0156S0038	93	99	112	438	396	537	3.9	4.19	4.63	22.22	20.38	27.18	4.24	23.26	2.45571	4.23496e-51	2.79518e-49	up
CIL0267S0014	669	668	530	1876	4049	2485	30.36	30.57	23.72	102.92	225.33	136.05	28.2167	154.767	2.45548	9.90183e-15	7.90645e-14	up
CIL1533S0007	444	467	520	2480	1688	2287	6.6	7	7.62	44.55	30.76	41	7.07333	38.77	2.45448	4.90284e-97	1.43781e-94	up
CIL1163S0015	217	304	443	1616	1833	873	7.22	10.2	14.54	65.02	74.81	35.05	10.6533	58.2933	2.45203	2.16917e-13	1.53243e-12	up
CIL0962S0136	6	2	0	24	2	10	0.45	0.15	0	2.19	0.18	0.91	0.2	1.09333	2.45066	0.0135695	0.0235073	up
CIL0064S0039	84	128	64	651	218	376	2.98	4.58	2.24	27.95	9.49	16.11	3.26667	17.85	2.45003	1.6681e-12	1.07246e-11	up
CIL1078S0014	256	171	322	172	2603	560	38.11	25.67	47.27	30.96	475.22	100.57	37.0167	202.25	2.44989	0.00019188	0.000463439	up
CIL1358S0028	81	112	146	1290	84	150	3.55	4.94	6.3	68.28	4.51	7.92	4.93	26.9033	2.44813	0.000442947	0.00100919	up
CIL1043S0037	180	184	195	577	1279	640	3.87	3.99	4.14	15.01	33.74	16.61	4	21.7867	2.44537	3.91752e-13	2.69742e-12	up
CIL1084S0022	1316	1571	1474	6913	7092	5487	26.29	31.65	29.04	166.97	173.75	132.24	28.9933	157.653	2.44296	8.60668e-40	3.35011e-38	up
CIL1508S0040	417	378	425	2423	685	2359	9.32	8.51	9.36	65.45	18.77	63.57	9.06333	49.2633	2.4424	2.31987e-13	1.63308e-12	up
CIL1404S0018	13	56	60	454	43	81	1.17	5.07	5.31	49.24	4.73	8.77	3.85	20.9133	2.44149	0.000513441	0.00115673	up
CIL1025S0142	36	27	32	202	93	130	1.6	1.21	1.4	10.84	5.06	6.96	1.40333	7.62	2.44093	2.34536e-20	2.91414e-19	up
CIL0176S0007	169	242	175	904	1005	708	9.28	13.4	9.48	60.02	67.68	46.9	10.72	58.2	2.44071	3.4232e-24	5.61262e-23	up
CIL1068S0099	464	432	450	2271	1409	2336	9.48	8.9	9.06	56.09	35.3	57.57	9.14667	49.6533	2.44057	3.91026e-62	4.13574e-60	up
CIL1313S0055	173	131	111	867	322	669	6.08	4.65	3.85	36.86	13.89	28.38	4.86	26.3767	2.44023	5.85963e-18	6.12581e-17	up
CIL0917S0006	184	144	185	712	562	1016	10.16	8.02	10.07	47.53	38.06	67.68	9.41667	51.09	2.43975	1.90556e-33	5.24832e-32	up
CIL1113S0049	56	85	66	423	442	55	1.82	2.78	2.11	16.6	17.59	2.15	2.23667	12.1133	2.43717	9.99e-06	2.91346e-05	up
CIL0942S0114	322	288	301	1123	1336	1596	25.55	23.05	23.55	107.75	130.03	152.81	24.05	130.197	2.43658	4.06909e-40	1.6106e-38	up
CIL1354S0046	68	77	56	625	25	249	4.39	5.01	3.56	48.78	1.98	19.39	4.32	23.3833	2.43638	0.00028263	0.000664192	up
CIL1061S0074	147	207	245	1018	652	995	4.56	6.48	7.5	38.2	24.82	37.26	6.18	33.4267	2.43532	1.08928e-32	2.85392e-31	up
CIL1032S0084	72	61	70	382	252	268	2.49	2.13	2.39	16	10.71	11.2	2.33667	12.6367	2.43509	5.89905e-42	2.54152e-40	up
CIL0407S0002	170	170	171	923	584	766	7.1	7.16	7.04	46.62	29.92	38.61	7.1	38.3833	2.43459	3.02623e-72	4.73321e-70	up
CIL1020S0007	4	3	7	38	4	20	0.16	0.12	0.28	1.85	0.2	0.97	0.186667	1.00667	2.43105	0.000453712	0.00103108	up
CIL1549S0010	4	6	6	43	14	14	0.66	0.99	0.97	8.52	2.82	2.77	0.873333	4.70333	2.42908	8.66583e-06	2.54947e-05	up
CIL1037S0082	454	351	348	2506	530	2082	11.79	9.19	8.91	78.65	16.87	65.21	9.96333	53.5767	2.4269	3.44152e-10	1.75317e-09	up
CIL1543S0016	4	17	7	47	43	34	0.41	1.77	0.71	5.85	5.43	4.22	0.963333	5.16667	2.42313	1.03221e-07	3.93011e-07	up
CIL1294S0070	7	8	7	56	6	35	0.47	0.54	0.46	4.55	0.49	2.84	0.49	2.62667	2.42238	8.23669e-05	0.000210356	up
CIL0203S0024	96	75	119	532	200	546	2.52	1.98	3.07	16.85	6.43	17.26	2.52333	13.5133	2.42098	1.6709e-15	1.43784e-14	up
CIL1229S0036	153	123	135	598	577	635	7.34	5.95	6.38	34.66	33.93	36.73	6.55667	35.1067	2.42071	5.22398e-61	5.39261e-59	up
MSTRG.17759	0	0	3	4	3	6	0	0	0.2	0.33	0.25	0.49	0.0666667	0.356667	2.41954	0.0306963	0.0493294	up
MSTRG.17150	7839	6722	8802	12242	52513	37623	179.42	155.18	198.12	337.75	1477.69	1033.33	177.573	949.59	2.41889	1.1336e-08	4.86446e-08	up
CIL1078S0021	91	213	51	1157	150	265	4.22	9.95	2.33	64.83	8.53	14.82	5.5	29.3933	2.41799	0.000112028	0.000279821	up
CIL1569S0016	42	77	85	463	104	332	1.36	2.51	2.71	18.09	4.12	12.95	2.19333	11.72	2.41778	6.32658e-09	2.79142e-08	up
CIL0031S0002	122	86	118	1026	239	164	3.94	2.8	3.76	40.09	9.47	6.39	3.5	18.65	2.41375	1.6364e-06	5.34293e-06	up
CIL1277S0044	2117	1882	2263	7862	8994	10561	54.33	48.7	57.27	243.93	283.06	326.98	53.4333	284.657	2.41341	4.46624e-47	2.43679e-45	up
CIL1541S0024	2298	2246	2861	6646	16453	9199	71.13	70.1	87.32	248.71	624.55	343.52	76.1833	405.593	2.41249	1.2497e-12	8.14626e-12	up
CIL0895S0167	39	42	43	316	100	126	1.14	1.24	1.24	11.2	3.6	4.46	1.20667	6.42	2.41155	9.97018e-12	5.95465e-11	up
CIL1158S0083	1979	2828	2796	12496	12440	8225	42.31	60.96	58.94	322.97	326.14	212.13	54.07	287.08	2.40855	4.71189e-24	7.66223e-23	up
CIL0184S0014	132	126	135	643	457	616	7.32	7.04	7.38	43.1	31.07	41.2	7.24667	38.4567	2.40784	1.73363e-82	3.44152e-80	up
CIL1038S0103	314	391	527	1428	2138	1796	34.7	43.58	57.43	190.82	289.8	239.48	45.2367	240.033	2.40767	2.53566e-20	3.14302e-19	up
CIL1196S0035	468	477	476	1971	2073	2156	16.18	16.63	16.23	82.38	87.89	89.92	16.3467	86.73	2.40753	7.85849e-66	9.89288e-64	up
CIL0454S0006	259	280	196	1278	871	1064	12.37	13.48	9.23	73.78	51	61.29	11.6933	62.0233	2.40712	3.74696e-45	1.87425e-43	up
CIL0948S0236	551	607	580	2644	2409	2524	9.39	10.43	9.74	54.46	50.33	51.87	9.85333	52.22	2.40592	1.53559e-90	3.77419e-88	up
CIL0933S0001	4	2	9	11	28	26	0.54	0.27	1.19	1.78	4.6	4.2	0.666667	3.52667	2.40327	4.25778e-05	0.000113654	up
CIL0266S0007	103	119	90	1073	97	193	1.51	1.75	1.3	18.97	1.74	3.4	1.52	8.03667	2.40253	6.80714e-05	0.000176077	up
CIL1611S0007	6	5	7	49	4	25	0.41	0.34	0.47	4.05	0.34	2.06	0.406667	2.15	2.40242	0.000391174	0.000899173	up
CIL1105S0008	60	63	61	390	170	239	2.35	2.49	2.36	18.48	8.17	11.31	2.4	12.6533	2.39841	1.78615e-22	2.59838e-21	up
CIL1068S0062	27	32	18	189	85	60	1.87	2.23	1.23	15.81	7.21	5.01	1.77667	9.34333	2.39476	1.86981e-09	8.77031e-09	up
CIL0079S0016	91	92	126	523	276	537	4.31	4.39	5.88	29.94	16.03	30.68	4.86	25.55	2.3943	1.13971e-26	2.19496e-25	up
CIL1135S0026	3	2	1	11	3	13	0.06	0.04	0.02	0.26	0.07	0.3	0.04	0.21	2.39232	0.00136169	0.00285376	up
MSTRG.22350	138	211	171	1213	413	619	6.37	9.82	7.78	67.7	23.38	34.47	7.99	41.85	2.38896	1.43038e-14	1.122e-13	up
CIL1330S0001	115	247	369	1167	1289	675	3.1	6.71	9.8	37.99	42.56	21.93	6.53667	34.16	2.38568	5.31439e-10	2.6497e-09	up
CIL1165S0031	12	12	23	90	46	67	0.24	0.23	0.43	2.08	1.07	1.55	0.3	1.56667	2.38466	1.54423e-13	1.10363e-12	up
CIL1030S0123	55	59	84	344	352	152	5.21	5.64	7.85	39.39	40.89	17.37	6.23333	32.55	2.38458	1.78197e-12	1.14197e-11	up
CIL1060S0021	7	16	25	154	19	33	0.78	1.79	2.74	20.68	2.59	4.42	1.77	9.23	2.38258	0.0002706	0.000638683	up
CIL1271S0026	307	351	262	1621	717	1616	13.81	15.93	11.62	88.19	39.57	87.73	13.7867	71.83	2.38131	9.9014e-22	1.37273e-20	up
CIL0235S0016	895	809	952	1913	6383	3035	44.22	40.31	46.38	114.28	386.78	180.92	43.6367	227.327	2.38115	1.5124e-09	7.16813e-09	up
CIL1298S0023	287	346	394	2123	1103	1174	9.3	11.31	12.59	83.19	43.84	45.9	11.0667	57.6433	2.38093	4.16014e-26	7.7685e-25	up
CIL1320S0019	2	4	3	17	17	4	0.16	0.33	0.24	1.69	1.71	0.4	0.243333	1.26667	2.38003	0.000585708	0.00130699	up
CIL1056S0009	18	33	20	249	16	39	0.69	1.28	0.76	11.61	0.76	1.82	0.91	4.73	2.3779	0.000825714	0.00179557	up
CIL0895S0210	8	0	5	24	15	16	0.58	0	0.36	2.12	1.34	1.41	0.313333	1.62333	2.37319	0.000177066	0.000430398	up
CIL1232S0001	39	48	40	200	202	139	3	3.72	3.03	18.57	19.03	12.88	3.25	16.8267	2.37224	2.10989e-21	2.8478e-20	up
CIL0893S0188	57	36	48	193	145	263	2.31	1.47	1.92	9.45	7.2	12.85	1.9	9.83333	2.37168	3.50677e-23	5.34866e-22	up
CIL0914S0130	304	325	274	2161	896	790	11.36	12.24	10.09	97.6	41.05	35.6	11.23	58.0833	2.37077	1.32277e-14	1.04202e-13	up
CIL0291S0005	2609	2844	2413	1875	16002	15498	251.91	276.91	229.74	218.88	1894.86	1805.35	252.853	1306.36	2.36918	1.14766e-05	3.31778e-05	up
CIL0937S0044	116	154	173	1442	234	206	6	8.04	8.83	90.25	14.86	12.87	7.62333	39.3267	2.36701	2.01473e-05	5.63074e-05	up
CIL1101S0090	168	104	187	380	810	748	8.96	5.59	9.83	24.49	52.96	48.11	8.12667	41.8533	2.36461	7.86214e-13	5.24285e-12	up
CIL0937S0088	1	0	2	8	1	4	0.07	0	0.14	0.67	0.08	0.33	0.07	0.36	2.36257	0.0310525	0.0498426	up
CIL1231S0001	265	270	279	1327	680	1439	6.35	6.53	6.6	38.47	20	41.63	6.49333	33.3667	2.36138	1.09081e-29	2.47152e-28	up
CIL0176S0037	108	90	136	635	275	502	5.47	4.6	6.8	38.9	17.09	30.69	5.62333	28.8933	2.36124	3.69633e-22	5.26441e-21	up
CIL0967S0117	7	25	7	95	49	21	0.17	0.59	0.16	2.7	1.42	0.6	0.306667	1.57333	2.35908	6.28949e-05	0.000163589	up
CIL1149S0090	2	4	4	6	6	30	0.07	0.14	0.14	0.26	0.26	1.27	0.116667	0.596667	2.35453	0.00151035	0.00314234	up
CIL1094S0043	189	195	221	1030	568	948	14.45	15.04	16.67	95.24	53.27	87.47	15.3867	78.66	2.35395	1.62276e-42	7.25797e-41	up
CIL1093S0010	561	760	798	3071	2286	3546	7.67	10.47	10.75	50.74	38.31	58.46	9.63	49.17	2.35217	5.15223e-40	2.0238e-38	up
CIL0176S0046	298	297	308	1615	861	1319	14.38	14.45	14.65	94.2	50.94	76.77	14.4933	73.97	2.35155	6.56179e-47	3.55756e-45	up
CIL1037S0067	94	113	95	813	261	196	4.43	5.37	4.42	46.33	15.09	11.15	4.74	24.19	2.35145	9.24252e-09	4.00675e-08	up
CIL1143S0043	665	822	548	2577	3423	2536	11.2	13.97	9.1	52.5	70.73	51.55	11.4233	58.26	2.35052	3.39074e-22	4.83452e-21	up
CIL1266S0027	88	130	217	1581	36	208	3.05	4.55	7.42	66.31	1.53	8.71	5.00667	25.5167	2.34952	0.00364825	0.00707631	up
MSTRG.11348	3	2	0	6	8	7	0.48	0.32	0	1.16	1.56	1.35	0.266667	1.35667	2.34696	0.00287293	0.00568311	up
CIL1385S0031	216	205	221	1057	751	878	13.49	12.91	13.61	79.82	57.53	66.16	13.3367	67.8367	2.34667	1.70391e-92	4.39729e-90	up
CIL1106S0017	17	5	16	68	49	42	0.63	0.19	0.58	3.03	2.22	1.87	0.466667	2.37333	2.34645	7.47793e-10	3.67237e-09	up
CIL1453S0009	38	69	52	312	154	199	1.32	2.42	1.78	13.13	6.57	8.35	1.84	9.35	2.34526	1.51861e-17	1.53689e-16	up
MSTRG.28830	52	37	50	93	334	151	4.65	3.33	4.41	10.05	36.57	16.28	4.13	20.9667	2.34388	7.98415e-08	3.09009e-07	up
CIL1003S0149	568	499	672	2674	1564	3016	14.1	12.49	16.45	80.24	47.61	90.31	14.3467	72.72	2.34164	6.83139e-34	1.91836e-32	up
CIL1445S0037	151	122	121	336	828	473	4.93	4.01	3.89	13.25	33.13	18.62	4.27667	21.6667	2.34092	1.16326e-11	6.90693e-11	up
CIL1256S0043	14	7	19	70	34	61	0.64	0.32	0.86	3.91	1.94	3.37	0.606667	3.07333	2.34083	8.82461e-11	4.77836e-10	up
CIL1378S0027	1	1	5	7	4	16	0.02	0.02	0.12	0.21	0.12	0.48	0.0533333	0.27	2.33985	0.00479098	0.00907455	up
CIL1246S0075	4484	3922	3875	14436	18979	17680	195.19	172.16	166.33	759.78	1013.22	928.53	177.893	900.51	2.33973	1.08218e-34	3.15567e-33	up
CIL1057S0044	1460	1807	1657	2891	10825	6722	28.53	35.6	31.93	68.29	259.39	158.46	32.02	162.047	2.33936	5.55825e-09	2.47186e-08	up
CIL1483S0012	67	65	213	826	226	374	4.04	3.95	12.65	60.16	16.7	27.18	6.88	34.68	2.33362	7.60364e-07	2.59388e-06	up
CIL1456S0049	38	76	98	491	194	193	2.87	5.8	7.31	44.91	18	17.61	5.32667	26.84	2.33308	1.47791e-09	7.01625e-09	up
CIL0359S0015	4	9	10	48	4	43	0.19	0.44	0.48	2.82	0.24	2.52	0.37	1.86	2.32971	0.000697838	0.00153701	up
MSTRG.23570	12	17	4	51	53	34	0.33	0.47	0.11	1.68	1.77	1.12	0.303333	1.52333	2.32826	1.26436e-07	4.75715e-07	up
CIL0266S0014	63	56	60	326	84	332	2	1.79	1.88	12.49	3.27	12.7	1.89	9.48667	2.32752	4.70425e-10	2.35825e-09	up
CIL0984S0057	276	288	311	1093	1198	1319	11.93	12.56	13.26	57.13	63.52	68.8	12.5833	63.15	2.32727	1.0664e-49	6.50604e-48	up
CIL1078S0106	66	71	63	371	268	186	4.2	4.56	3.95	28.56	20.92	14.29	4.23667	21.2567	2.32691	2.97536e-20	3.67569e-19	up
CIL1350S0001	4	2	1	18	5	6	0.74	0.37	0.18	4.01	1.13	1.33	0.43	2.15667	2.32639	0.00193388	0.00394589	up
CIL1075S0087	1616	1671	2294	1945	11375	9602	55.98	58.37	78.35	81.46	483.21	401.27	64.2333	321.98	2.32558	1.18722e-06	3.9437e-06	up
CIL1374S0015	10	8	16	61	20	59	0.72	0.58	1.14	5.32	1.77	5.14	0.813333	4.07667	2.32547	4.47772e-08	1.78991e-07	up
CIL1141S0042	27	29	34	268	58	45	2.41	2.61	3	28.95	6.36	4.85	2.67333	13.3867	2.32409	1.03467e-05	3.0083e-05	up
MSTRG.733	8	19	19	101	31	58	0.34	0.81	0.8	5.18	1.61	2.97	0.65	3.25333	2.32341	5.12994e-08	2.03643e-07	up
CIL1003S0003	141	107	86	341	346	688	2.88	2.19	1.73	8.41	8.66	16.94	2.26667	11.3367	2.32235	1.6346e-15	1.40848e-14	up
CIL0992S0049	2	3	6	13	7	25	0.1	0.14	0.28	0.75	0.41	1.44	0.173333	0.866667	2.32193	0.00019008	0.000459263	up
CIL1032S0100	749	798	885	3970	2300	3733	23.51	25.26	27.39	150.65	88.53	141.35	25.3867	126.843	2.3209	2.72513e-51	1.81256e-49	up
CIL1411S0014	176	245	340	1833	529	763	7.46	10.47	14.21	93.94	27.5	39.02	10.7133	53.4867	2.31977	2.53737e-10	1.3099e-09	up
MSTRG.27459	83	63	74	149	450	298	2.48	1.89	2.18	5.4	16.52	10.78	2.18333	10.9	2.31972	9.39314e-10	4.55827e-09	up
CIL1187S0036	2975	2540	3360	6265	14662	15382	133.34	114.81	148.51	339.51	805.97	831.8	132.22	659.093	2.31754	6.59419e-13	4.42821e-12	up
CIL1268S0017	337	314	283	1500	762	1576	10.22	9.6	8.46	54.98	28.33	57.65	9.42667	46.9867	2.31743	1.79764e-28	3.81511e-27	up
CIL0902S0216	29	23	23	121	84	103	1.08	0.87	0.85	5.46	3.84	4.63	0.933333	4.64333	2.3147	2.95786e-26	5.56367e-25	up
CIL0330S0006	1	4	2	9	2	18	0.09	0.37	0.18	0.99	0.22	1.97	0.213333	1.06	2.31288	0.00533523	0.0100165	up
CIL0953S0035	35	34	51	285	64	141	0.69	0.67	0.99	6.78	1.54	3.35	0.783333	3.89	2.31207	8.36517e-09	3.64047e-08	up
CIL1505S0017	35	65	36	308	124	125	1.17	2.18	1.18	12.4	5.06	5.02	1.51	7.49333	2.31106	2.85378e-10	1.46562e-09	up
CIL1212S0021	15	17	10	100	20	52	1.56	1.78	1.02	12.56	2.55	6.52	1.45333	7.21	2.31063	1.14681e-06	3.81635e-06	up
CIL0990S0158	2	5	12	24	36	17	0.08	0.2	0.46	1.14	1.73	0.8	0.246667	1.22333	2.31018	4.26691e-05	0.000113886	up
CIL1321S0026	270	274	333	1054	1428	1087	11.39	11.66	13.85	53.76	73.88	55.32	12.3	60.9867	2.30984	4.66629e-26	8.65108e-25	up
CIL0998S0046	27	24	43	138	126	118	2.26	2.03	3.56	13.99	12.96	11.94	2.61667	12.9633	2.30863	3.60324e-21	4.7711e-20	up
CIL1443S0022	7	2	3	29	2	18	1.08	0.31	0.45	5.39	0.38	3.34	0.613333	3.03667	2.30775	0.0033324	0.00651066	up
CIL0982S0015	104	51	67	355	172	378	4.84	2.39	3.08	19.99	9.82	21.23	3.43667	17.0133	2.30758	3.12548e-15	2.62905e-14	up
CIL1358S0032	36	40	28	317	38	70	4.39	4.92	3.37	46.74	5.68	10.3	4.22667	20.9067	2.30637	4.61917e-05	0.00012259	up
CIL1078S0097	1975	1592	2205	4264	9272	9883	77.92	63.34	85.79	203.4	448.64	470.44	75.6833	374.16	2.30561	1.19546e-13	8.61041e-13	up
CIL0049S0005	3	5	6	18	10	29	0.4	0.68	0.8	2.93	1.65	4.71	0.626667	3.09667	2.30495	1.04082e-05	3.02449e-05	up
CIL0970S0133	139	134	174	543	604	667	7.35	7.15	9.08	34.73	39.19	42.57	7.86	38.83	2.30457	7.16266e-38	2.5081e-36	up
CIL1025S0112	1460	1413	1815	4058	8793	6127	54.66	53.34	67	183.67	403.7	276.73	58.3333	288.033	2.30384	2.19495e-14	1.68636e-13	up
MSTRG.9529	4	4	1	25	0	12	0.21	0.21	0.05	1.57	0	0.75	0.156667	0.773333	2.30339	0.0279661	0.0453457	up
CIL1467S0016	50	54	57	155	260	238	1.24	1.35	1.39	4.64	7.89	7.11	1.32667	6.54667	2.30295	2.46496e-17	2.45137e-16	up
CIL0559S0001	3	3	2	12	10	10	0.16	0.16	0.11	0.79	0.67	0.66	0.143333	0.706667	2.30166	8.70925e-05	0.00022146	up
MSTRG.19165	642	466	470	1645	2005	2750	33.51	24.53	24.19	103.83	128.36	173.13	27.41	135.107	2.30132	1.71597e-24	2.87933e-23	up
CIL1495S0010	22	27	21	164	35	85	0.58	0.71	0.54	5.19	1.12	2.69	0.61	3	2.29808	5.45587e-08	2.15851e-07	up
CIL0002S0030	4300	3971	3376	13044	15166	18827	206.73	192.52	160.05	758.21	894.21	1092.02	186.433	914.813	2.29482	3.76207e-34	1.06573e-32	up
CIL0987S0188	884	921	590	4606	1466	3623	73.51	77.23	48.38	463.09	149.51	363.48	66.3733	325.36	2.29336	1.77715e-13	1.26344e-12	up
CIL0957S0122	304	423	314	1574	1167	1455	4.36	6.12	4.44	27.32	20.54	25.2	4.97333	24.3533	2.29183	1.57037e-43	7.42244e-42	up
CIL1265S0018	7	13	11	82	4	39	0.49	0.92	0.76	6.97	0.34	3.31	0.723333	3.54	2.29102	0.0012225	0.00258493	up
CIL0045S0005	568	510	527	1980	1982	2482	12.59	11.4	11.52	53.07	53.88	66.38	11.8367	57.7767	2.28722	1.65891e-59	1.60343e-57	up
CIL1192S0020	227	250	199	1254	728	734	22.38	24.86	19.35	149.5	88.04	87.32	22.1967	108.287	2.28644	4.34258e-29	9.50542e-28	up
CIL1494S0019	359	298	320	1181	979	1760	15.12	12.65	13.29	60.12	50.56	89.41	13.6867	66.6967	2.28484	5.91076e-32	1.48818e-30	up
CIL1390S0041	9	1	9	39	10	27	0.91	0.1	0.9	4.76	1.24	3.29	0.636667	3.09667	2.28211	0.000201633	0.00048518	up
MSTRG.22346	4	1	2	20	4	4	1.13	0.28	0.56	6.83	1.39	1.36	0.656667	3.19333	2.28183	0.00598987	0.0111321	up
CIL1374S0014	5	0	0	10	5	5	0.85	0	0	2.06	1.04	1.03	0.283333	1.37667	2.28061	0.0296414	0.0477738	up
CIL1358S0043	1859	1762	1431	6174	7225	6780	44.78	42.8	33.99	179.81	213.44	197.04	40.5233	196.763	2.27964	7.00674e-36	2.18122e-34	up
CIL0893S0242	7	9	7	40	32	20	0.34	0.44	0.33	2.33	1.89	1.16	0.37	1.79333	2.27705	2.10365e-08	8.72951e-08	up
CIL1107S0044	256	225	264	654	1684	620	12.47	11.03	12.68	38.48	100.47	36.39	12.06	58.4467	2.27689	2.81069e-09	1.29435e-08	up
CIL0917S0068	501	600	492	1923	2556	1862	26.27	31.72	25.44	121.89	164.34	117.78	27.81	134.67	2.27575	1.86746e-24	3.12134e-23	up
CIL1254S0060	5	6	0	24	7	13	0.45	0.54	0	2.61	0.77	1.41	0.33	1.59667	2.27453	0.00199732	0.00406345	up
MSTRG.25664	823	784	952	2626	3595	3943	24.35	23.39	27.77	93.92	130.43	140.73	25.17	121.693	2.27347	3.0297e-28	6.34124e-27	up
CIL0938S0018	6	3	14	52	21	18	0.62	0.31	1.43	6.5	2.66	2.25	0.786667	3.80333	2.27344	3.61707e-05	9.755e-05	up
CIL1089S0057	2	4	3	21	9	6	0.08	0.16	0.12	1.01	0.44	0.29	0.12	0.58	2.27302	0.00046036	0.00104472	up
CIL1043S0081	278	277	533	1371	2105	824	20.45	20.55	38.66	121.94	189.91	73.13	26.5533	128.327	2.27286	7.2704e-10	3.57522e-09	up
CIL1031S0073	17	12	22	172	5	26	1.51	1.08	1.93	18.49	0.55	2.79	1.50667	7.27667	2.27192	0.00462129	0.00877827	up
CIL1303S0058	103	120	99	168	759	344	2.11	2.48	2	4.17	19.09	8.51	2.19667	10.59	2.26931	4.85778e-07	1.70171e-06	up
CIL1263S0043	5	3	7	30	5	25	0.18	0.11	0.25	1.3	0.22	1.08	0.18	0.866667	2.26748	0.000204524	0.00049154	up
CIL1393S0033	6	7	13	43	29	30	0.24	0.29	0.52	2.12	1.45	1.48	0.35	1.68333	2.26589	1.32538e-09	6.32471e-09	up
CIL1224S0041	3	2	1	10	8	6	0.13	0.09	0.04	0.52	0.42	0.31	0.0866667	0.416667	2.26534	0.000928401	0.00200111	up
MSTRG.19164	3636	3762	3591	12090	11951	19450	72.18	75.3	70.29	290.18	290.95	465.83	72.59	348.987	2.26533	2.57402e-32	6.6229e-31	up
CIL0893S0173	11	9	35	74	84	58	0.54	0.44	1.69	4.37	5.03	3.42	0.89	4.27333	2.26348	2.79555e-07	1.00775e-06	up
CIL0513S0005	569	655	585	2384	1984	2766	20.73	24.07	21.02	105.02	88.65	121.59	21.94	105.087	2.25994	2.70487e-64	3.08869e-62	up
CIL1157S0068	692	717	630	3654	1412	2984	22.29	23.29	20.01	142.32	55.79	115.98	21.8633	104.697	2.25963	9.52841e-21	1.22156e-19	up
CIL1295S0047	19	11	31	144	29	67	1.16	0.68	1.87	10.64	2.17	4.94	1.23667	5.91667	2.25833	3.75702e-06	1.16326e-05	up
CIL0114S0007	129	169	149	788	525	446	8.44	11.15	9.61	62.31	42.09	35.18	9.73333	46.5267	2.25705	2.08855e-25	3.69933e-24	up
CIL1190S0052	203	174	178	623	722	833	9.03	7.81	7.81	33.52	39.41	44.73	8.21667	39.22	2.25496	1.86088e-36	5.99547e-35	up
CIL1619S0002	56	82	67	359	148	299	2.04	3.01	2.41	15.81	6.61	13.14	2.48667	11.8533	2.25301	5.04888e-17	4.88368e-16	up
CIL0970S0045	157	147	182	509	640	754	9.81	9.26	11.21	38.44	49.03	56.82	10.0933	48.0967	2.25253	1.63275e-28	3.47088e-27	up
CIL1078S0050	383	462	442	2076	1090	1884	14.2	17.27	16.16	93.06	49.56	84.27	15.8767	75.63	2.25205	6.95346e-35	2.05318e-33	up
MSTRG.3517	161	193	200	842	638	689	4.08	4.93	4.99	25.78	19.82	21.05	4.66667	22.2167	2.25118	6.01594e-58	5.44749e-56	up
CIL0218S0030	5	8	5	25	22	23	0.32	0.51	0.31	1.93	1.72	1.77	0.38	1.80667	2.24926	3.28885e-08	1.33284e-07	up
CIL1392S0001	3	8	2	15	16	20	0.38	1.02	0.25	2.3	2.48	3.06	0.55	2.61333	2.24839	2.28894e-05	6.33873e-05	up
CIL0062S0004	86	133	130	728	463	169	4.29	6.69	6.4	43.93	28.34	10.18	5.79333	27.4833	2.24609	3.42492e-08	1.38537e-07	up
MSTRG.8753	251	239	309	1163	815	1137	17.96	17.24	21.81	100.68	71.55	98.2	19.0033	90.1433	2.24597	8.90447e-63	9.5749e-61	up
CIL1564S0033	279	336	413	1596	1355	1051	8.41	10.21	12.28	58.17	50.1	38.23	10.3	48.8333	2.24522	3.46973e-27	6.87209e-26	up
CIL0984S0082	42	23	34	155	111	120	1.71	0.95	1.37	7.64	5.55	5.9	1.34333	6.36333	2.24397	1.39384e-22	2.04032e-21	up
CIL1405S0006	13	0	8	47	15	20	1.04	0	0.63	4.53	1.46	1.92	0.556667	2.63667	2.24383	0.00223084	0.00450303	up
CIL0917S0079	21	17	18	50	128	39	2.4	1.96	2.03	6.9	17.92	5.37	2.13	10.0633	2.24018	1.20967e-06	4.01209e-06	up
MSTRG.10125	7	2	2	17	13	13	0.3	0.09	0.08	0.87	0.68	0.67	0.156667	0.74	2.23983	4.90849e-05	0.000129895	up
CIL1277S0007	1204	1159	1145	4882	5119	3605	59.03	57.3	55.35	289.38	307.78	213.23	57.2267	270.13	2.23889	1.48059e-31	3.67048e-30	up
CIL1501S0045	19	21	10	89	12	94	0.55	0.61	0.28	3.1	0.42	3.27	0.48	2.26333	2.23734	7.93299e-05	0.000203062	up
CIL1143S0099	18	17	15	116	43	36	0.79	0.75	0.65	6.12	2.3	1.9	0.73	3.44	2.23644	5.64315e-08	2.2268e-07	up
CIL1295S0055	410	546	462	2795	818	1896	23.15	31.09	25.73	190.84	56.65	129.18	26.6567	125.557	2.23577	3.56767e-13	2.4664e-12	up
CIL1180S0051	98	66	95	278	348	377	8.74	5.95	8.37	29.93	38.06	40.54	7.68667	36.1767	2.23463	5.43813e-24	8.78234e-23	up
CIL1459S0028	143	143	111	670	399	470	5.13	5.17	3.93	29.06	17.55	20.34	4.74333	22.3167	2.23415	8.70203e-34	2.43308e-32	up
CIL0921S0076	1022	1458	1266	3490	5892	5082	14.35	20.64	17.53	59.25	101.46	86.09	17.5067	82.2667	2.2324	1.28649e-17	1.30865e-16	up
CIL1102S0067	400	410	502	3622	665	789	24.98	25.82	30.92	273.53	50.94	59.46	27.24	127.977	2.23208	1.92695e-06	6.22935e-06	up
CIL0252S0004	161	175	104	487	718	493	3.77	4.13	2.4	13.79	20.63	13.93	3.43333	16.1167	2.23087	1.92698e-15	1.6516e-14	up
CIL0935S0118	65	61	58	218	178	312	2.56	2.42	2.25	10.39	8.6	14.83	2.41	11.2733	2.22581	5.882e-26	1.08195e-24	up
CIL1060S0047	84	65	58	307	236	254	2.45	1.91	1.67	10.82	8.44	8.93	2.01	9.39667	2.22495	2.48541e-36	7.94807e-35	up
CIL1030S0146	807	915	855	3728	2524	3657	36.12	41.3	37.74	201.77	138.56	197.5	38.3867	179.277	2.22351	7.06311e-73	1.11145e-70	up
CIL1145S0068	22	16	28	105	53	95	1.52	1.11	1.9	8.76	4.48	7.9	1.51	7.04667	2.22239	3.26605e-15	2.74193e-14	up
MSTRG.1005	39	51	43	303	64	146	0.74	0.94	0.79	6.82	1.47	3.23	0.823333	3.84	2.22156	3.20315e-08	1.29995e-07	up
CIL0945S0094	57	66	57	299	136	257	1.75	2.04	1.73	11.1	5.12	9.52	1.84	8.58	2.22127	4.34116e-21	5.71885e-20	up
CIL0917S0086	59	34	62	151	351	89	3.21	1.87	3.33	9.93	23.42	5.84	2.80333	13.0633	2.22031	1.09345e-06	3.65291e-06	up
CIL1230S0087	5	3	4	17	23	5	0.27	0.16	0.21	1.12	1.53	0.33	0.213333	0.993333	2.21917	0.000470179	0.00106512	up
CIL1078S0027	54	31	24	58	244	113	5.44	3.15	2.38	7.07	30.15	13.74	3.65667	16.9867	2.2158	5.43815e-06	1.64798e-05	up
MSTRG.5272	9	13	4	32	45	24	0.18	0.26	0.08	0.76	1.08	0.57	0.173333	0.803333	2.21245	1.24019e-06	4.10643e-06	up
CIL1040S0055	35	29	16	231	41	34	3.41	2.85	1.54	27.19	4.9	3.99	2.6	12.0267	2.20965	0.000180066	0.000437033	up
CIL0023S0020	25	16	22	83	94	62	3.45	2.23	2.99	13.84	15.92	10.34	2.89	13.3667	2.2095	9.36384e-14	6.81383e-13	up
CIL1502S0015	44	57	39	155	206	172	2.37	3.09	2.07	10.08	13.58	11.16	2.51	11.6067	2.20919	3.97215e-18	4.23067e-17	up
CIL1098S0027	60	39	70	348	159	135	3.53	2.31	4.06	24.73	11.46	9.57	3.3	15.2533	2.20859	1.87329e-11	1.08981e-10	up
CIL1235S0027	43	29	54	164	115	198	4.93	3.35	6.11	22.75	16.18	27.4	4.79667	22.11	2.20459	1.50384e-19	1.77213e-18	up
CIL1182S0019	203	199	237	978	587	857	17.62	17.42	20.28	102.62	62.48	89.74	18.44	84.9467	2.20372	8.72185e-51	5.64123e-49	up
CIL1443S0029	200	219	188	957	893	444	7.39	8.16	6.85	42.76	40.48	19.8	7.46667	34.3467	2.20163	5.48188e-15	4.50257e-14	up
CIL1588S0012	0	1	3	5	6	4	0	0.05	0.15	0.31	0.37	0.24	0.0666667	0.306667	2.20163	0.0140301	0.0242336	up
CIL1086S0103	90	85	103	374	314	362	2.86	2.72	3.23	14.37	12.24	13.88	2.93667	13.4967	2.20035	1.54493e-57	1.37683e-55	up
CIL1020S0048	45	42	53	295	117	117	3.37	3.18	3.92	26.75	10.76	10.59	3.49	16.0333	2.19978	6.24981e-12	3.79861e-11	up
CIL1293S0071	34	19	29	143	105	61	3.02	1.7	2.54	15.35	11.43	6.53	2.42	11.1033	2.19791	4.75441e-11	2.65062e-10	up
CIL1185S0003	47	62	34	204	223	112	5.76	7.67	4.11	30.24	33.53	16.57	5.84667	26.78	2.19547	2.79582e-11	1.60028e-10	up
CIL0202S0004	21	21	26	131	93	31	3.33	3.36	4.07	25.14	18.1	5.94	3.58667	16.3933	2.19239	4.12279e-07	1.4555e-06	up
CIL1071S0063	50	65	84	505	128	115	1.68	2.2	2.78	20.49	5.27	4.66	2.22	10.14	2.19143	1.34876e-06	4.44709e-06	up
CIL1122S0021	25	23	42	224	61	53	2.45	2.27	4.06	26.52	7.32	6.26	2.92667	13.3667	2.19131	3.0787e-06	9.67092e-06	up
CIL1071S0038	815	946	1189	8633	989	1467	29.87	34.96	42.97	382.51	44.45	64.86	35.9333	163.94	2.18977	8.66781e-05	0.000220493	up
CIL1060S0019	452	475	740	2344	2717	1157	19.84	21.02	32.03	124.38	146.24	61.26	24.2967	110.627	2.18687	1.30452e-11	7.70734e-11	up
CIL1403S0024	109	124	158	387	549	525	6.96	7.99	9.96	29.9	43.02	40.47	8.30333	37.7967	2.1865	1.03259e-20	1.31986e-19	up
CIL1344S0004	52	71	61	210	148	331	2.43	3.34	2.81	11.85	8.47	18.63	2.86	12.9833	2.18257	2.19094e-16	2.01431e-15	up
CIL1230S0056	39	19	51	211	81	114	1.59	0.78	2.05	10.4	4.05	5.61	1.47333	6.68667	2.1822	1.40807e-09	6.69825e-09	up
MSTRG.14111	1219	1224	1287	5312	4044	4566	22.34	22.62	23.25	117.68	90.88	100.94	22.7367	103.167	2.18188	4.00413e-136	2.95241e-133	up
CIL1459S0032	183	249	202	740	1286	328	10.41	14.28	11.33	50.9	89.72	22.51	12.0067	54.3767	2.17915	9.82625e-08	3.7546e-07	up
CIL1602S0001	12	9	25	121	18	32	0.51	0.39	1.05	6.24	0.94	1.65	0.65	2.94333	2.17894	0.000222004	0.000530612	up
CIL1061S0046	4198	3444	4536	10123	14437	20718	233.47	193.15	248.76	680.68	984.7	1390.13	225.127	1018.5	2.17764	3.04403e-18	3.27732e-17	up
CIL1463S0028	1	1	3	4	5	10	0.09	0.09	0.26	0.42	0.53	1.04	0.146667	0.663333	2.17719	0.0053585	0.0100558	up
MSTRG.22222	4	3	2	10	14	13	0.37	0.27	0.19	1.01	1.41	1.32	0.276667	1.24667	2.17186	4.46264e-05	0.000118705	up
CIL0495S0002	356	363	347	1808	1425	714	14.35	14.75	13.79	88.1	70.43	34.72	14.2967	64.4167	2.17176	3.65473e-14	2.75782e-13	up
CIL1051S0057	257	274	270	1319	566	1088	8.03	8.63	8.32	49.83	21.69	41.01	8.32667	37.51	2.17146	1.14708e-23	1.81166e-22	up
CIL0259S0020	31	39	36	240	98	54	0.53	0.67	0.61	4.97	2.06	1.12	0.603333	2.71667	2.17081	2.82945e-07	1.01883e-06	up
CIL1341S0039	312	251	299	2147	395	653	19.18	15.55	18.1	159.56	29.75	48.4	17.61	79.2367	2.16977	4.02825e-07	1.42407e-06	up
CIL1222S0001	8	1	4	18	14	16	1.33	0.17	0.66	3.63	2.86	3.22	0.72	3.23667	2.16844	5.68688e-05	0.000149072	up
CIL0025S0015	7	8	9	32	23	33	0.24	0.27	0.3	1.32	0.96	1.36	0.27	1.21333	2.16794	8.63755e-10	4.2106e-09	up
MSTRG.7022	8	22	29	127	43	47	0.37	1.06	1.37	7.35	2.52	2.71	0.933333	4.19333	2.16763	4.59585e-06	1.40378e-05	up
CIL1112S0031	65	43	53	407	25	165	1.91	1.28	1.54	14.49	0.9	5.86	1.57667	7.08333	2.16755	0.000306247	0.0007164	up
CIL1207S0018	27	18	30	117	45	115	1.68	1.13	1.84	8.8	3.43	8.63	1.55	6.95333	2.16544	4.20212e-11	2.35953e-10	up
CIL0354S0005	3	4	14	54	12	11	0.24	0.33	1.11	5.27	1.19	1.07	0.56	2.51	2.16419	0.00175151	0.00359597	up
CIL1382S0002	102	123	108	493	299	436	2.59	3.15	2.71	15.16	9.32	13.38	2.81667	12.62	2.16365	1.25612e-39	4.84553e-38	up
CIL1090S0025	3	0	1	8	2	5	0.17	0	0.06	0.55	0.14	0.34	0.0766667	0.343333	2.16294	0.0231919	0.0382266	up
CIL0940S0162	73	64	61	277	110	345	1.79	1.58	1.47	8.19	3.3	10.18	1.61333	7.22333	2.16262	2.46184e-12	1.55756e-11	up
MSTRG.7925	95	70	58	414	180	229	3.53	2.62	2.12	18.58	8.19	10.25	2.75667	12.34	2.16235	3.55413e-15	2.97122e-14	up
CIL1541S0002	26	16	6	61	71	46	3.54	2.17	0.8	9.89	11.79	7.46	2.17	9.71333	2.16227	3.31944e-07	1.18567e-06	up
CIL1031S0024	51	15	25	162	43	130	7.09	2.1	3.43	27.23	7.33	21.81	4.20667	18.79	2.15922	1.95296e-06	6.31026e-06	up
CIL1295S0044	127	155	140	382	697	467	4.53	5.57	4.92	16.47	30.47	20.09	5.00667	22.3433	2.15792	1.46748e-14	1.14866e-13	up
CIL1122S0098	28	28	33	104	55	167	1.14	1.15	1.33	5.13	2.75	8.22	1.20667	5.36667	2.153	7.48939e-11	4.08278e-10	up
CIL0118S0012	283	310	316	1068	1279	968	9.45	10.44	10.41	43.14	52.4	39.01	10.1	44.85	2.15075	3.02579e-28	6.33819e-27	up
CIL1147S0093	17	7	24	118	25	32	0.98	0.4	1.36	8.18	1.76	2.21	0.913333	4.05	2.14871	8.92897e-05	0.000226645	up
CIL1361S0065	8310	7814	10812	19961	50849	26827	585.31	555	750.94	1699.85	4392.38	2279.68	630.417	2790.64	2.14622	3.35016e-10	1.70831e-09	up
CIL0073S0010	146	142	120	174	877	428	16.11	15.8	13.06	23.21	118.68	56.98	14.99	66.29	2.14479	2.24621e-06	7.19207e-06	up
CIL1235S0031	56	50	46	282	88	183	2.07	1.86	1.67	12.57	3.98	8.14	1.86667	8.23	2.14043	4.07291e-12	2.51941e-11	up
CIL0984S0117	462	435	441	1775	1341	1731	20.3	19.28	19.11	94.31	72.27	91.77	19.5633	86.1167	2.13814	1.96012e-120	9.91858e-118	up
CIL1500S0029	134	196	153	723	434	592	5.42	8	6.1	35.37	21.54	28.9	6.50667	28.6033	2.13619	1.26516e-29	2.85153e-28	up
CIL0978S0146	3	12	5	31	13	29	0.06	0.26	0.11	0.8	0.34	0.75	0.143333	0.63	2.13598	2.71849e-05	7.45707e-05	up
CIL0990S0096	1453	1953	2303	5479	8319	6740	64.75	87.76	101.2	295.2	454.65	362.37	84.57	370.74	2.13219	1.03947e-17	1.06789e-16	up
CIL0970S0053	26	27	27	109	74	106	1.49	1.56	1.52	7.53	5.19	7.31	1.52333	6.67667	2.1319	8.69135e-24	1.3837e-22	up
CIL0970S0146	204	155	222	448	948	689	6.87	5.26	7.37	18.24	39.16	28	6.5	28.4667	2.13076	1.42394e-12	9.22378e-12	up
CIL0727S0001	11	5	4	17	44	10	1.06	0.5	0.39	2.05	5.26	1.2	0.65	2.83667	2.12569	0.00051352	0.00115681	up
CIL0919S0040	118	137	105	679	281	335	2.89	3.38	2.53	20.08	8.43	9.89	2.93333	12.8	2.12553	2.77741e-15	2.3516e-14	up
MSTRG.15	352	404	357	2356	999	636	8.28	9.58	8.29	66.99	28.81	18.05	8.71667	37.95	2.12225	1.51628e-09	7.18523e-09	up
CIL1320S0040	6	7	3	46	9	2	0.33	0.39	0.16	3.09	0.61	0.13	0.293333	1.27667	2.12177	0.0111604	0.019688	up
CIL0990S0157	206	261	246	410	1700	429	6.85	8.75	8.06	16.47	69.28	17.2	7.88667	34.3167	2.12142	7.78626e-06	2.30304e-05	up
CIL1096S0002	722	572	800	2476	3084	1907	68.76	54.93	75.12	285.08	360.19	219.1	66.27	288.123	2.12026	2.57107e-19	2.98209e-18	up
CIL0970S0046	891	861	1073	1919	5161	2961	58.16	56.68	69.07	151.45	413.16	233.19	61.3033	265.933	2.11703	4.81436e-10	2.41064e-09	up
CIL0389S0008	119	109	139	686	208	417	3.34	3.08	3.85	23.27	7.16	14.11	3.42333	14.8467	2.11667	1.26443e-12	8.23398e-12	up
CIL0989S0043	240	250	199	959	620	876	9.46	9.94	7.74	45.72	29.98	41.67	9.04667	39.1233	2.11257	5.14881e-46	2.69524e-44	up
CIL1429S0039	1539	1808	2268	2252	13663	3920	56.07	66.43	81.49	99.21	610.52	172.32	67.9967	294.017	2.11236	2.73457e-05	7.49799e-05	up
CIL1468S0007	169	140	189	398	666	703	13.11	10.95	14.46	37.34	63.37	65.81	12.84	55.5067	2.11202	2.20798e-16	2.02925e-15	up
CIL1028S0002	59	45	63	264	163	166	2.24	1.72	2.36	12.11	7.58	7.6	2.10667	9.09667	2.11038	2.69216e-23	4.13306e-22	up
CIL0908S0052	456	712	844	5293	609	1252	24.57	38.69	44.85	344.87	40.25	81.4	36.0367	155.507	2.10944	7.63047e-05	0.00019594	up
CIL0866S0001	0	7	8	14	27	15	0	0.47	0.52	1.04	2.09	1.14	0.33	1.42333	2.10874	0.00168768	0.0034757	up
CIL1185S0020	74	69	77	263	171	347	2.4	2.26	2.46	10.31	6.8	13.57	2.37333	10.2267	2.10735	1.0787e-22	1.59348e-21	up
CIL1096S0013	30	47	50	251	53	146	1.53	2.42	2.52	15.52	3.32	9.01	2.15667	9.28333	2.10584	2.45634e-07	8.92577e-07	up
CIL0893S0115	11	11	50	201	16	37	0.59	0.59	2.63	12.96	1.05	2.38	1.27	5.46333	2.10495	0.0046503	0.00882558	up
CIL0541S0002	7	2	4	28	10	8	0.86	0.25	0.48	4.15	1.5	1.18	0.53	2.27667	2.10286	0.000613599	0.00136428	up
CIL1104S0042	208	190	191	493	1131	448	23.67	21.8	21.43	67.82	157.8	61.48	22.3	95.7	2.10148	3.32791e-09	1.5163e-08	up
CIL1436S0022	189	186	159	847	423	617	3.87	3.83	3.22	20.98	10.63	15.25	3.64	15.62	2.10138	3.07852e-28	6.43299e-27	up
CIL0942S0134	228	221	201	822	804	668	10.57	10.33	9.19	46.06	45.7	37.35	10.03	43.0367	2.10124	1.38554e-36	4.51471e-35	up
CIL1294S0038	26	13	17	69	94	33	4.07	2.11	2.57	13.06	18.14	6.31	2.91667	12.5033	2.09992	5.7177e-07	1.98382e-06	up
CIL0009S0025	172	123	118	472	457	524	17.11	12.34	11.57	56.76	55.74	62.87	13.6733	58.4567	2.096	9.38768e-33	2.46458e-31	up
CIL1512S0004	7	5	6	48	9	6	0.3	0.22	0.26	2.53	0.48	0.32	0.26	1.11	2.09398	0.00230332	0.00463506	up
CIL1032S0007	86	93	77	403	118	381	3.88	4.23	3.42	21.97	6.52	20.72	3.84333	16.4033	2.09356	2.12549e-10	1.10456e-09	up
CIL1196S0046	1676	2367	2481	18235	2269	2445	45.82	65.25	66.88	602.71	76.07	80.64	59.3167	253.14	2.09343	0.000246076	0.000584006	up
CIL1068S0097	10	9	13	41	24	47	0.93	0.84	1.19	4.61	2.74	5.28	0.986667	4.21	2.09319	6.32693e-10	3.12735e-09	up
MSTRG.23283	4	2	2	6	6	16	0.27	0.13	0.13	0.48	0.49	1.29	0.176667	0.753333	2.09226	0.00174622	0.00358624	up
CIL1231S0013	3	8	4	45	2	6	0.23	0.61	0.3	4.12	0.19	0.55	0.38	1.62	2.09192	0.0176698	0.0298667	up
CIL1009S0103	67	59	75	402	80	223	1.26	1.12	1.39	9.15	1.85	5.07	1.25667	5.35667	2.09173	7.64124e-08	2.9627e-07	up
CIL1143S0057	27	5	21	101	39	45	1.36	0.25	1.05	6.17	2.41	2.74	0.886667	3.77333	2.08938	1.47282e-05	4.19481e-05	up
CIL1135S0045	102	88	142	279	490	388	9.13	7.94	12.53	30.18	53.77	41.88	9.86667	41.9433	2.08781	1.15591e-13	8.33257e-13	up
CIL0893S0359	47	30	59	192	101	182	2.33	1.5	2.88	11.49	6.13	10.87	2.23667	9.49667	2.08607	8.91783e-16	7.85469e-15	up
CIL1002S0006	23	17	42	164	61	60	1.8	1.34	3.24	15.52	5.86	5.67	2.12667	9.01667	2.084	2.71088e-07	9.78593e-07	up
CIL1061S0037	183	225	188	743	543	795	4.02	4.99	4.08	19.75	14.64	21.09	4.36333	18.4933	2.0835	1.53971e-44	7.46902e-43	up
CIL0149S0003	113	103	140	514	366	358	6.53	6	7.98	35.91	25.94	24.96	6.83667	28.9367	2.08153	3.49743e-33	9.40189e-32	up
CIL1282S0045	408	503	457	2742	892	1136	22.02	27.38	24.32	178.94	59.05	73.97	24.5733	103.987	2.08123	1.45796e-11	8.57468e-11	up
CIL0957S0032	10	5	8	21	17	41	0.42	0.21	0.33	1.08	0.88	2.1	0.32	1.35333	2.08037	2.7076e-06	8.56941e-06	up
CIL0028S0018	4	10	3	24	16	20	0.19	0.47	0.14	1.35	0.91	1.12	0.266667	1.12667	2.07895	9.00107e-06	2.64207e-05	up
CIL1114S0012	16	7	17	85	18	35	0.43	0.19	0.45	2.77	0.6	1.15	0.356667	1.50667	2.07871	2.8743e-05	7.85026e-05	up
CIL1093S0098	72	103	89	322	182	415	2.42	3.49	2.95	13.08	7.5	16.82	2.95333	12.4667	2.07766	1.63178e-16	1.51379e-15	up
CIL0990S0103	392	358	411	1948	783	1289	15.68	14.44	16.21	94.21	38.41	62.2	15.4433	64.94	2.07212	1.99636e-20	2.48768e-19	up
CIL0992S0045	73	78	96	400	231	223	4.54	4.89	5.89	30.07	17.62	16.73	5.10667	21.4733	2.07209	1.19351e-20	1.51934e-19	up
CIL1549S0009	4	5	4	30	9	6	0.92	1.16	0.9	8.32	2.53	1.66	0.993333	4.17	2.0697	0.00104311	0.0022301	up
CIL0982S0011	19	23	32	86	80	89	0.89	1.08	1.47	4.85	4.57	5.01	1.14667	4.81	2.06859	5.20439e-18	5.4731e-17	up
CIL0895S0150	616	677	622	2594	1856	2160	30.76	34.09	30.63	156.63	113.68	130.15	31.8267	133.487	2.06839	9.33577e-79	1.67311e-76	up
MSTRG.8125	0	1	4	4	9	4	0	0.12	0.45	0.56	1.27	0.56	0.19	0.796667	2.06798	0.0224737	0.0371657	up
CIL1376S0005	536	375	333	994	1458	1835	15.07	10.63	9.23	33.8	50.29	62.26	11.6433	48.7833	2.06688	2.92572e-15	2.46988e-14	up
MSTRG.24013	1257	1114	1560	8182	1788	3591	42.84	38.28	52.42	337.11	74.73	147.64	44.5133	186.493	2.06681	1.56366e-08	6.5926e-08	up
CIL0035S0006	1973	2191	2400	8324	6783	7499	45.25	50.68	54.28	230.83	190.8	207.51	50.07	209.713	2.0664	2.02918e-80	3.79471e-78	up
CIL1303S0044	135	120	175	536	621	319	3.54	3.17	4.52	16.98	19.96	10.08	3.74333	15.6733	2.06592	9.1934e-14	6.69965e-13	up
CIL1107S0054	147	141	130	603	442	395	6.66	6.44	5.81	33.02	24.55	21.58	6.30333	26.3833	2.06544	7.71502e-33	2.03372e-31	up
CIL1030S0135	189	169	107	883	215	508	11.78	10.63	6.58	66.56	16.44	38.21	9.66333	40.4033	2.06388	1.58539e-08	6.67878e-08	up
CIL1082S0103	449	452	468	2560	1209	929	28.74	29.18	29.54	198.13	94.91	71.75	29.1533	121.597	2.06037	4.65885e-13	3.1781e-12	up
CIL0092S0019	7	5	3	2	43	6	1.95	1.41	0.83	0.68	14.72	2.02	1.39667	5.80667	2.05572	0.013993	0.0241744	up
CIL1246S0056	75	92	98	454	179	269	3.02	3.73	3.89	22.1	8.84	13.06	3.54667	14.6667	2.04801	2.48171e-15	2.10607e-14	up
CIL0925S0054	164	174	214	1318	171	392	12.5	13.37	16.09	121.47	15.99	36.05	13.9867	57.8367	2.04793	2.18438e-05	6.07197e-05	up
CIL0919S0026	4	4	7	22	20	9	0.27	0.27	0.46	1.77	1.63	0.72	0.333333	1.37333	2.04264	6.14156e-05	0.000159967	up
CIL1130S0072	228	244	190	1479	216	552	11.36	12.26	9.34	89.11	13.2	33.19	10.9867	45.1667	2.0395	5.13719e-06	1.561e-05	up
CIL0902S0137	73	41	40	249	76	198	1.4	0.79	0.76	5.76	1.78	4.57	0.983333	4.03667	2.03741	5.43627e-09	2.42304e-08	up
CIL0907S0001	3	2	0	11	2	4	0.65	0.43	0	2.86	0.53	1.04	0.36	1.47667	2.03628	0.0299745	0.0482535	up
CIL0957S0033	6	1	4	12	9	16	0.16	0.03	0.11	0.4	0.3	0.53	0.1	0.41	2.03562	0.000316774	0.00073935	up
CIL1294S0036	86	68	52	174	275	245	4.21	3.36	2.51	10.3	16.51	14.47	3.36	13.76	2.03395	8.11455e-14	5.94415e-13	up
CIL1348S0034	273	353	292	1539	860	695	7.28	9.49	7.68	49.62	28.12	22.36	8.15	33.3667	2.03354	5.15589e-16	4.61847e-15	up
CIL1294S0047	89	94	67	395	125	325	3.05	3.25	2.26	16.36	5.25	13.43	2.85333	11.68	2.03332	5.14759e-11	2.85686e-10	up
CIL0256S0003	14	1	4	20	24	20	2.03	0.15	0.57	3.5	4.26	3.49	0.916667	3.75	2.03242	0.000718708	0.00157866	up
CIL1180S0049	265	183	218	605	818	805	23.58	16.41	19.11	65.14	89.27	86.45	19.7	80.2867	2.02696	1.58394e-21	2.16508e-20	up
MSTRG.24708	1933	1277	1148	5607	3125	5862	85.48	56.95	50.06	299.79	169.49	312.76	64.1633	260.68	2.02246	3.25662e-19	3.74359e-18	up
CIL1084S0024	120	103	95	385	255	423	14.26	12.32	11.17	55.38	37.21	60.68	12.5833	51.09	2.02153	4.93795e-32	1.25058e-30	up
CIL1196S0089	85	86	100	428	203	274	2.64	2.69	3.06	16.05	7.72	10.25	2.79667	11.34	2.01964	2.89944e-21	3.86697e-20	up
CIL0455S0006	130	117	107	383	481	316	3.83	3.48	3.11	13.64	17.38	11.23	3.47333	14.0833	2.0196	1.85195e-18	2.0166e-17	up
CIL0919S0102	53	29	40	92	215	98	7.31	4.03	5.44	15.34	36.37	16.31	5.59333	22.6733	2.01922	1.33634e-07	5.00826e-07	up
CIL0102S0011	112	101	123	558	126	437	3.89	3.54	4.21	23.44	5.37	18.32	3.88	15.71	2.01755	1.88753e-08	7.87066e-08	up
MSTRG.20874	1914	1753	1865	4305	9822	4192	122.39	113.06	117.62	332.88	770.4	323.45	117.69	475.577	2.01469	1.80477e-09	8.48993e-09	up
CIL1371S0035	3	2	1	15	1	5	0.23	0.16	0.1	1.42	0.09	0.47	0.163333	0.66	2.01465	0.0223783	0.0370226	up
CIL1486S0030	20	16	40	187	20	45	1.03	0.83	2.04	11.67	1.27	2.8	1.3	5.24667	2.01289	0.000809217	0.00176172	up
CIL1055S0131	199	256	227	827	361	1078	10.16	13.18	11.43	51.04	22.6	66.38	11.59	46.6733	2.00972	1.44778e-12	9.37354e-12	up
CIL1328S0049	2	5	9	12	9	32	0.15	0.37	0.66	1.07	0.82	2.86	0.393333	1.58333	2.00914	0.000909615	0.00196406	up
CIL1531S0014	2738	2487	3522	5535	13662	9626	103.39	94.7	131.14	252.7	632.7	438.54	109.743	441.313	2.00767	2.38252e-10	1.23292e-09	up
CIL0185S0019	390	329	379	1327	1198	1101	13.23	11.26	12.68	54.43	49.85	45.07	12.39	49.7833	2.00649	2.3325e-49	1.40314e-47	up
CIL0942S0044	113	156	164	560	471	393	2.95	4.11	4.23	17.7	15.1	12.39	3.76333	15.0633	2.00096	1.05081e-23	1.66472e-22	up
CIL0940S0051	287	246	261	1024	439	1155	9.13	7.89	8.19	39.39	17.13	44.34	8.40333	33.62	2.00029	1.61395e-15	1.39116e-14	up
CIL1133S0043	6	10	4	16	26	24	1.09	1.83	0.71	3.5	5.77	5.24	1.21	4.83667	1.99901	9.19187e-06	2.69378e-05	up
CIL0101S0003	152	144	134	481	458	475	5.74	5.48	4.99	21.95	21.2	21.63	5.40333	21.5933	1.99866	1.48969e-47	8.30331e-46	up
CIL0972S0070	40	36	3	80	8	173	1.39	1.26	0.1	3.37	0.34	7.27	0.916667	3.66	1.99737	0.0139331	0.0240805	up
CIL0489S0002	19	22	16	104	40	43	1.05	1.23	0.87	6.97	2.72	2.88	1.05	4.19	1.99656	3.08863e-08	1.25683e-07	up
CIL1020S0017	89	83	89	353	159	346	3.2	3.01	3.16	15.35	7.01	15.01	3.12333	12.4567	1.99576	3.69938e-18	3.9532e-17	up
CIL0983S0001	10	47	33	169	62	67	0.53	2.42	1.65	10.34	3.88	4.12	1.53333	6.11333	1.99529	2.82392e-05	7.72492e-05	up
CIL0962S0117	73	63	90	166	340	232	6.3	5.49	7.66	17.33	36.01	24.17	6.48333	25.8367	1.99461	5.78173e-11	3.19164e-10	up
CIL1169S0009	3	2	2	13	3	7	0.28	0.19	0.18	1.46	0.34	0.79	0.216667	0.863333	1.99444	0.0046421	0.00881132	up
CIL1293S0063	160	208	175	613	337	834	6.02	7.89	6.49	27.88	15.55	37.85	6.8	27.0933	1.99433	1.55149e-15	1.34e-14	up
CIL1273S0010	164	244	178	693	754	472	7.94	11.91	8.5	40.56	44.77	27.57	9.45	37.6333	1.99362	1.75908e-15	1.5117e-14	up
CIL1086S0049	10	10	19	97	13	18	0.43	0.43	0.8	5	0.68	0.93	0.553333	2.20333	1.99347	0.00124935	0.00263545	up
CIL0090S0001	34	45	35	177	114	82	1.63	2.18	1.66	10.28	6.72	4.75	1.82333	7.25	1.9914	2.01056e-12	1.28084e-11	up
CIL0098S0003	86	138	96	499	159	392	2.88	4.66	3.17	20.21	6.53	15.84	3.57	14.1933	1.99122	3.13901e-10	1.6054e-09	up
CIL1236S0021	256	298	444	979	1296	977	21.73	25.51	37.16	100.47	134.91	100.05	28.1333	111.81	1.9907	6.87705e-16	6.10933e-15	up
CIL1230S0022	91	75	147	85	516	417	3.38	2.81	5.38	3.81	23.49	18.67	3.85667	15.3233	1.9903	4.62156e-05	0.000122641	up
CIL0293S0015	147	126	158	568	365	475	12.3	10.63	13.03	57.45	37.45	47.94	11.9867	47.6133	1.98994	4.13627e-46	2.17847e-44	up
CIL1031S0136	19	12	13	49	24	71	1.98	1.26	1.33	6.17	3.06	8.91	1.52333	6.04667	1.98891	8.89383e-08	3.41959e-07	up
CIL0430S0006	327	342	326	281	2330	618	18.56	19.57	18.24	19.28	162.16	42.31	18.79	74.5833	1.98889	0.000199017	0.000479466	up
CIL1294S0075	3	4	3	14	7	12	0.18	0.24	0.18	1.01	0.51	0.86	0.2	0.793333	1.98793	0.000225726	0.000538782	up
CIL0893S0121	9	7	11	79	3	6	0.45	0.35	0.54	4.76	0.18	0.36	0.446667	1.76667	1.98376	0.0204495	0.0340851	up
CIL1107S0041	1282	1220	816	4199	2802	3772	58.06	55.72	36.44	229.92	155.63	206.1	50.0733	197.217	1.97767	4.64572e-27	9.16607e-26	up
CIL0957S0147	252	240	253	487	1314	593	11.18	10.74	11.07	26.12	71.49	31.74	10.9967	43.1167	1.97118	2.46406e-08	1.01339e-07	up
CIL1403S0014	74	67	82	264	146	310	3.82	3.49	4.17	16.47	9.24	19.3	3.82667	15.0033	1.97112	3.74412e-19	4.27731e-18	up
MSTRG.2505	55	60	56	245	130	177	1.7	1.87	1.71	9.16	4.93	6.61	1.76	6.9	1.97102	3.77097e-23	5.73468e-22	up
MSTRG.9749	842	885	601	2434	2551	2581	50.51	53.61	35.24	173.89	186.77	185.62	46.4533	182.093	1.97082	5.81257e-27	1.13899e-25	up
CIL1294S0037	121	160	133	492	470	373	7.67	10.21	8.34	37.73	36.52	28.52	8.74	34.2567	1.97068	4.28007e-24	6.97763e-23	up
CIL0935S0138	33	26	32	132	40	122	1.89	1.5	1.81	9.14	2.81	8.43	1.73333	6.79333	1.97057	7.65794e-09	3.3485e-08	up
CIL1506S0037	66	71	81	167	216	321	2.16	2.34	2.61	6.59	8.64	12.63	2.37	9.28667	1.97027	3.97071e-15	3.2981e-14	up
MSTRG.8797	14	8	4	18	45	22	2.33	1.34	0.71	3.6	9.18	4.37	1.46	5.71667	1.96921	0.000110206	0.00027559	up
MSTRG.21587	319	373	348	1132	1214	1000	10.14	11.96	10.91	43.53	47.35	38.37	11.0033	43.0833	1.96919	1.23161e-30	2.93211e-29	up
CIL1300S0029	108	86	95	387	242	302	4.42	3.55	3.84	19.16	12.15	14.92	3.93667	15.41	1.96882	6.71049e-36	2.09405e-34	up
CIL1061S0063	402	540	380	1533	1019	1712	18.39	24.91	17.14	84.77	57.16	94.47	20.1467	78.8	1.96765	2.745e-25	4.81906e-24	up
CIL1413S0002	989	949	1110	2992	3389	3409	32.17	31.13	35.61	117.68	135.21	133.8	32.97	128.897	1.96699	4.68733e-39	1.74806e-37	up
CIL1265S0077	40	34	55	128	200	84	2.71	2.32	3.67	10.49	16.62	6.87	2.9	11.3267	1.9656	1.36596e-08	5.80458e-08	up
CIL0136S0005	35	53	28	301	51	22	2.18	3.34	1.72	22.71	3.9	1.66	2.41333	9.42333	1.96521	0.00249224	0.00498544	up
CIL1400S0021	195	235	356	487	1346	678	25.34	30.79	45.62	76.51	214.5	106.29	33.9167	132.433	1.9652	1.32941e-07	4.98446e-07	up
CIL1436S0049	668	677	667	704	4373	1347	31.81	32.51	31.32	40.53	255.37	77.38	31.88	124.427	1.96457	5.39374e-05	0.000141979	up
CIL1264S0014	19	50	39	179	30	139	1.1	2.93	2.23	12.56	2.14	9.73	2.08667	8.14333	1.96442	6.14686e-05	0.000160073	up
CIL0957S0190	54	47	49	119	185	177	4.22	3.71	3.78	11.25	17.74	16.7	3.90333	15.23	1.96414	4.81757e-15	3.97592e-14	up
CIL1078S0095	85	68	76	295	251	188	3.6	2.91	3.18	15.12	13.05	9.61	3.23	12.5933	1.96305	2.27336e-21	3.05565e-20	up
CIL1130S0061	1	1	3	4	2	10	0.07	0.08	0.22	0.36	0.18	0.9	0.123333	0.48	1.96047	0.0221962	0.036738	up
CIL0908S0093	1436	1199	1068	3835	3197	4832	49.66	41.81	36.42	160.35	135.59	201.62	42.63	165.853	1.95997	4.10086e-35	1.23059e-33	up
CIL0413S0004	491	502	602	2101	1333	1667	24.77	25.54	29.95	128.15	82.47	101.46	26.7533	104.027	1.95916	1.99963e-49	1.21137e-47	up
MSTRG.22717	70	83	105	399	167	259	3.89	4.65	5.75	26.81	11.38	17.36	4.76333	18.5167	1.95878	5.38764e-15	4.43081e-14	up
MSTRG.11592	2	3	5	9	7	16	0.23	0.35	0.56	1.24	0.98	2.21	0.38	1.47667	1.95827	0.000727046	0.00159589	up
CIL0282S0003	3250	3315	3773	6967	14645	11348	116.82	120.16	133.74	302.79	645.61	492.13	123.573	480.177	1.9582	1.52847e-12	9.86376e-12	up
CIL0919S0125	68	80	62	32	510	124	1.77	2.1	1.59	1.01	16.29	3.9	1.82	7.06667	1.95709	0.00171017	0.00351737	up
MSTRG.10626	81	70	49	367	173	100	3.22	2.82	1.91	17.62	8.44	4.78	2.65	10.28	1.95578	1.5807e-07	5.87507e-07	up
CIL0893S0145	15	9	8	47	22	33	1.92	1.19	1.06	7.44	3.51	5.22	1.39	5.39	1.9552	5.91144e-08	2.32706e-07	up
MSTRG.11811	194	151	209	243	937	561	15.12	11.64	15.98	22.66	90.86	52.18	14.2467	55.2333	1.95491	8.71493e-07	2.94688e-06	up
CIL1040S0067	20	27	21	84	62	71	2.66	3.63	2.76	13.53	10.13	11.41	3.01667	11.69	1.95425	3.58676e-17	3.51418e-16	up
CIL1090S0093	722	485	568	1732	2223	1685	100.18	67.86	77.72	290.57	378.3	282.09	81.92	316.987	1.95213	7.77415e-20	9.3402e-19	up
MSTRG.2900	5	2	6	9	11	21	0.38	0.15	0.45	0.83	1.03	1.93	0.326667	1.26333	1.95134	0.00035838	0.000829109	up
CIL1001S0087	14	11	37	43	147	5	1.14	0.9	2.96	4.22	14.62	0.49	1.66667	6.44333	1.95084	0.00862507	0.0155492	up
CIL1141S0049	80	80	82	292	149	329	2.06	2.08	2.08	9.1	4.71	10.23	2.07333	8.01333	1.95045	3.45562e-18	3.70192e-17	up
CIL1315S0017	1082	1130	1126	5008	2078	3536	24.45	25.74	25.09	136.8	57.58	96.38	25.0933	96.92	1.94949	1.11801e-20	1.42482e-19	up
CIL0893S0056	87	72	50	331	50	286	3.54	2.95	2	16.27	2.49	14.03	2.83	10.93	1.94942	2.452e-05	6.76561e-05	up
CIL0935S0027	835	862	977	3857	1858	2782	76.68	79.83	88.47	428.2	209.27	308.27	81.66	315.247	1.94878	2.63328e-27	5.23956e-26	up
CIL1274S0046	271	256	291	210	1891	478	12.01	11.44	12.71	11.25	102.76	25.55	12.0533	46.52	1.94842	0.000344123	0.00079892	up
CIL1481S0028	142	150	142	558	281	541	8.21	8.74	8.09	38.99	19.91	37.72	8.34667	32.2067	1.94809	1.7744e-23	2.76689e-22	up
CIL1156S0038	270	303	246	897	680	1020	6.03	6.83	5.42	24.23	18.64	27.5	6.09333	23.4567	1.94469	4.25192e-40	1.67526e-38	up
CIL0912S0083	866	751	1079	5515	601	2433	56.74	49.62	69.71	436.89	48.29	192.33	58.69	225.837	1.94409	4.6566e-05	0.000123495	up
MSTRG.26449	163	167	174	823	389	381	11.88	12.27	12.5	72.51	34.76	33.5	12.2167	46.9233	1.94145	1.60531e-15	1.38417e-14	up
CIL1145S0056	213	278	253	787	1061	496	6	7.9	7.03	26.81	36.67	16.86	6.97667	26.78	1.94055	1.39715e-11	8.23201e-11	up
CIL0301S0010	3	5	4	16	6	16	0.13	0.23	0.18	0.87	0.33	0.87	0.18	0.69	1.9386	0.000293388	0.000687566	up
CIL1507S0008	201	216	365	485	1154	815	9.98	10.82	17.87	29.12	70.28	48.83	12.89	49.41	1.93855	9.32456e-09	4.0396e-08	up
CIL1291S0020	70	76	60	272	187	191	2.98	3.26	2.52	13.98	9.75	9.8	2.92	11.1767	1.93645	3.22996e-26	6.06222e-25	up
CIL1499S0043	143	117	206	812	304	349	5.23	4.31	7.43	35.9	13.63	15.4	5.65667	21.6433	1.9359	3.56722e-10	1.81469e-09	up
CIL1001S0084	5	1	7	7	22	11	0.27	0.05	0.37	0.46	1.46	0.72	0.23	0.88	1.93587	0.00283344	0.00560972	up
MSTRG.23366	6	11	20	102	3	11	0.22	0.41	0.74	4.6	0.14	0.49	0.456667	1.74333	1.93264	0.0242471	0.0397778	up
CIL0170S0021	174	208	330	1474	418	339	6.08	7.33	11.38	62.32	17.93	14.3	8.26333	31.5167	1.93132	5.51695e-06	1.6701e-05	up
CIL1459S0025	1515	1516	1518	4660	4023	5589	54.88	55.38	54.23	204.11	178.74	244.27	54.83	209.04	1.93074	4.72357e-63	5.16531e-61	up
CIL1112S0071	25	7	12	44	66	29	1.56	0.46	0.77	3.31	5.09	2.22	0.93	3.54	1.92845	1.81222e-05	5.10065e-05	up
CIL1229S0078	38	61	31	280	43	86	1.83	2.97	1.48	16.34	2.55	5.01	2.09333	7.96667	1.92817	0.000112597	0.000281106	up
CIL1038S0027	921	959	790	3819	1751	2798	35.67	37.45	30.17	178.83	83.17	130.74	34.43	130.913	1.92687	1.34627e-22	1.97516e-21	up
CIL0957S0007	47	26	24	122	122	59	2.82	1.57	1.42	8.84	8.97	4.27	1.93667	7.36	1.92613	3.30008e-08	1.33718e-07	up
CIL1133S0063	22	25	26	95	80	53	1.52	1.75	1.78	7.95	6.79	4.43	1.68333	6.39	1.9245	3.49809e-12	2.18004e-11	up
CIL0895S0193	116	180	119	825	239	234	8.44	13.21	8.54	72.61	21.34	20.55	10.0633	38.1667	1.9232	9.61126e-07	3.22798e-06	up
MSTRG.28321	12	0	5	27	8	18	1.4	0	0.62	3.9	1.17	2.57	0.673333	2.54667	1.91922	0.0100877	0.0179453	up
CIL1025S0139	10	3	6	51	2	6	0.44	0.13	0.26	2.7	0.11	0.32	0.276667	1.04333	1.91498	0.0273698	0.0444737	up
CIL0972S0122	2	2	8	24	7	6	0.17	0.17	0.66	2.44	0.72	0.61	0.333333	1.25667	1.91456	0.00613798	0.0113836	up
CIL0442S0002	113	123	79	486	93	402	4.98	5.46	3.43	25.87	5.02	21.35	4.62333	17.4133	1.91319	2.52904e-06	8.03088e-06	up
CIL1383S0003	78	72	61	315	181	158	3.65	3.4	2.82	17.83	10.39	8.92	3.29	12.38	1.91185	1.93543e-15	1.65774e-14	up
CIL1096S0023	87	117	242	477	628	265	3.77	5.11	10.34	25	33.38	13.86	6.40667	24.08	1.91019	5.51273e-07	1.91735e-06	up
CIL0996S0024	230	186	258	760	566	756	9.45	7.71	10.45	37.75	28.52	37.47	9.20333	34.58	1.90971	6.63572e-47	3.59011e-45	up
CIL1167S0005	1367	1280	1548	2709	6023	4182	56.53	53.38	63.13	135.45	305.48	208.66	57.68	216.53	1.90842	3.83381e-11	2.16355e-10	up
MSTRG.17637	129	77	92	518	237	165	6.32	3.8	4.44	30.66	14.23	9.75	4.85333	18.2133	1.90795	1.54801e-08	6.52771e-08	up
CIL0987S0097	17	19	19	65	59	45	1.14	1.28	1.25	5.26	4.85	3.64	1.22333	4.58333	1.90558	2.02998e-12	1.29193e-11	up
CIL1471S0031	449	518	431	1636	1145	1532	20.74	24.13	19.63	91.37	64.86	85.38	21.5	80.5367	1.90531	1.68971e-52	1.21466e-50	up
CIL0935S0136	97	73	118	238	373	273	6.69	5.08	8.02	19.85	31.55	22.72	6.59667	24.7067	1.90509	2.92011e-13	2.03509e-12	up
MSTRG.17652	51	38	43	193	98	115	1.96	1.47	1.63	8.96	4.62	5.33	1.68667	6.30333	1.90194	7.76879e-16	6.87784e-15	up
CIL1385S0012	2	5	6	17	6	17	0.12	0.31	0.36	1.25	0.45	1.25	0.263333	0.983333	1.90079	0.000568515	0.00127182	up
CIL1385S0033	91	82	93	302	265	249	6.91	6.28	6.97	27.74	24.69	22.82	6.72	25.0833	1.9002	2.22655e-35	6.784e-34	up
MSTRG.24663	6	3	12	23	21	20	0.56	0.28	1.1	2.59	2.4	2.25	0.646667	2.41333	1.89993	1.4235e-05	4.0615e-05	up
CIL1523S0003	91	64	54	222	108	313	3.76	2.66	2.2	11.08	5.47	15.59	2.87333	10.7133	1.89861	5.54578e-10	2.75761e-09	up
CIL0925S0128	3210	2887	3666	8857	9082	11968	87.51	79.37	98.55	291.94	303.65	393.64	88.4767	329.743	1.89797	2.8521e-35	8.62885e-34	up
CIL1246S0127	22	42	14	98	75	67	0.79	1.51	0.49	4.23	3.28	2.88	0.93	3.46333	1.89686	5.19678e-08	2.0617e-07	up
CIL1531S0021	165	150	202	419	984	170	7.7	7.06	9.29	23.64	56.3	9.57	8.01667	29.8367	1.89601	3.70096e-05	9.97189e-05	up
CIL1277S0006	5	3	4	28	8	1	0.24	0.14	0.19	1.6	0.46	0.06	0.19	0.706667	1.89503	0.0200847	0.0335182	up
CIL1149S0083	85	76	120	402	145	313	2.64	2.38	3.68	15.1	5.52	11.73	2.9	10.7833	1.89468	9.85721e-12	5.8899e-11	up
CIL1068S0098	401	439	429	1371	1225	1280	16.58	18.31	17.49	68.55	62.13	63.86	17.46	64.8467	1.89298	2.78088e-63	3.05388e-61	up
CIL1187S0020	119	94	95	307	165	470	4.03	3.21	3.17	12.57	6.86	19.21	3.47	12.88	1.89213	1.03204e-11	6.15671e-11	up
MSTRG.13503	87	86	66	317	76	337	2.73	2.73	2.05	12.08	2.93	12.85	2.50333	9.28667	1.89131	6.82047e-07	2.34344e-06	up
CIL1515S0032	2778	2920	4140	2191	19230	8382	144.55	153.22	212.43	137.84	1227.18	526.21	170.067	630.41	1.89019	0.000213784	0.000512172	up
CIL0884S0002	471	461	301	1586	622	1564	13.14	12.97	8.28	53.52	21.29	52.66	11.4633	42.49	1.8901	9.08174e-12	5.44546e-11	up
CIL0114S0023	10	21	17	71	20	56	0.26	0.55	0.44	2.23	0.64	1.76	0.416667	1.54333	1.88908	4.07831e-06	1.2558e-05	up
CIL1245S0053	12	23	14	78	21	51	0.31	0.61	0.36	2.46	0.67	1.61	0.426667	1.58	1.88874	4.565e-06	1.39501e-05	up
CIL0551S0005	13	4	2	31	11	16	0.78	0.24	0.12	2.25	0.81	1.16	0.38	1.40667	1.88821	0.00130196	0.00273768	up
CIL1584S0002	251	309	240	1046	621	770	9.39	11.66	8.85	47.32	28.5	34.76	9.96667	36.86	1.88687	3.73505e-29	8.19646e-28	up
CIL1185S0002	45	31	39	120	147	82	5.14	3.57	4.39	16.56	20.58	11.29	4.36667	16.1433	1.88633	3.04437e-11	1.73653e-10	up
CIL1064S0069	12	21	51	170	25	60	0.65	1.15	2.72	11.12	1.66	3.92	1.50667	5.56667	1.88545	0.000995106	0.00213419	up
CIL1361S0068	8	8	3	23	15	20	0.69	0.7	0.26	2.41	1.59	2.09	0.55	2.03	1.88398	8.54819e-06	2.51658e-05	up
CIL1375S0033	806	966	953	1405	4916	1908	22.7	27.44	26.47	47.85	169.83	64.84	25.5367	94.1733	1.88275	1.884e-06	6.10041e-06	up
CIL0929S0196	65	70	84	219	183	261	2.66	2.89	3.39	10.84	9.19	12.89	2.98	10.9733	1.88062	9.1719e-29	1.97744e-27	up
MSTRG.666	2	4	4	9	10	11	0.2	0.41	0.4	1.11	1.25	1.35	0.336667	1.23667	1.87706	0.000532639	0.00119727	up
CIL0893S0363	55	82	141	158	528	147	1.53	2.3	3.86	5.3	17.98	4.92	2.56333	9.4	1.87464	7.12764e-05	0.000183796	up
CIL0940S0106	13	4	13	46	13	32	0.47	0.15	0.46	2.01	0.57	1.38	0.36	1.32	1.87447	7.21979e-05	0.000186042	up
CIL1038S0030	1250	1189	1292	4100	4215	2919	40.08	38.45	40.85	158.95	165.76	112.93	39.7933	145.88	1.87418	5.3512e-24	8.64736e-23	up
CIL0957S0044	529	532	629	1206	2610	1255	8.25	8.37	9.67	22.74	49.92	23.61	8.76333	32.09	1.87257	2.22301e-09	1.0348e-08	up
CIL1310S0020	31	29	37	125	60	107	2.01	1.9	2.37	9.81	4.78	8.38	2.09333	7.65667	1.87091	9.05062e-15	7.26725e-14	up
CIL0948S0144	181	186	180	512	567	566	7.2	7.46	7.06	24.62	27.66	27.16	7.24	26.48	1.87084	7.71711e-34	2.16393e-32	up
CIL0556S0002	305	342	344	826	1157	990	22.51	25.45	25.03	73.7	104.72	88.15	24.33	88.8567	1.86874	1.76925e-20	2.21324e-19	up
CIL1060S0109	39	27	30	165	16	108	2.44	1.71	1.85	12.51	1.23	8.17	2	7.30333	1.86856	0.000365063	0.000843737	up
CIL1294S0063	941	1007	993	3014	2803	3014	70.11	75.66	72.96	271.52	256.14	270.94	72.91	266.2	1.86832	4.85893e-68	6.56516e-66	up
CIL0990S0143	2	0	5	10	2	9	0.17	0	0.43	1.04	0.21	0.94	0.2	0.73	1.8679	0.031062	0.0498519	up
CIL1229S0013	186	123	221	627	474	485	10.72	7.15	12.56	43.7	33.51	33.73	10.1433	36.98	1.86621	5.10345e-22	7.23255e-21	up
MSTRG.26448	142	132	174	667	419	255	9	8.44	10.87	51.11	32.56	19.5	9.43667	34.39	1.86564	2.39241e-11	1.37814e-10	up
CIL1040S0068	62	63	61	235	141	182	4.82	4.94	4.68	22.09	13.45	17.07	4.81333	17.5367	1.86527	1.39075e-27	2.83276e-26	up
CIL1157S0022	611	692	555	2129	1348	2097	16.44	18.78	14.73	69.28	44.49	68.09	16.65	60.62	1.86427	2.96111e-36	9.411e-35	up
CIL1142S0038	152	140	160	496	340	518	18.64	17.31	19.34	73.53	51.12	76.62	18.43	67.09	1.86404	4.8785e-43	2.2402e-41	up
CIL0121S0003	2	1	1	5	4	3	0.61	0.31	0.3	1.84	1.5	1.1	0.406667	1.48	1.86368	0.0237371	0.0390294	up
CIL1038S0036	343	399	597	2874	238	898	7.29	8.55	12.52	73.87	6.21	23.03	9.45333	34.37	1.86225	0.000570296	0.00127514	up
CIL0207S0012	740	731	845	1901	2839	2167	55.55	55.34	62.55	172.55	261.39	196.28	57.8133	210.073	1.86142	3.7832e-18	4.03776e-17	up
MSTRG.17134	740	617	659	1297	2941	1764	48.12	40.46	42.26	101.98	234.56	138.4	43.6133	158.313	1.85994	4.68629e-10	2.3497e-09	up
CIL0978S0141	226	270	273	1041	511	740	6.96	8.38	8.29	38.75	19.29	27.49	7.87667	28.51	1.85581	4.10938e-23	6.23461e-22	up
MSTRG.28128	1006	1056	971	2073	3447	3434	16.07	17.03	15.26	40.12	67.95	66.45	16.12	58.1733	1.85151	1.27532e-15	1.10666e-14	up
CIL1136S0047	397	433	506	1841	1015	1107	13.89	15.28	17.46	77.88	43.55	46.73	15.5433	56.0533	1.8505	2.16686e-23	3.34651e-22	up
CIL1348S0064	583	617	601	2808	988	1552	20.66	22.05	21	120.29	42.93	66.35	21.2367	76.5233	1.84934	2.18827e-13	1.54551e-12	up
CIL1330S0028	19	15	29	92	39	55	0.94	0.75	1.41	5.5	2.37	3.28	1.03333	3.71667	1.8467	8.53021e-09	3.70979e-08	up
MSTRG.1710	102	124	126	794	111	145	2.89	3.53	3.49	26.9	3.83	4.91	3.30333	11.88	1.84654	0.000308552	0.000721204	up
CIL1372S0018	103	108	100	344	257	320	5.92	6.26	5.67	23.9	18.11	22.18	5.95	21.3967	1.84642	5.10548e-47	2.77383e-45	up
CIL1077S0020	10	0	7	11	19	20	1.41	0	0.97	1.87	3.28	3.4	0.793333	2.85	1.84496	0.00564943	0.0105564	up
CIL1405S0035	19	19	18	112	16	38	0.71	0.72	0.66	5.06	0.73	1.71	0.696667	2.5	1.84339	0.00022555	0.00053856	up
CIL1087S0082	670	762	779	2572	1389	2561	13	14.91	14.9	60.34	33.05	59.95	14.27	51.1133	1.84071	1.21609e-26	2.33337e-25	up
CIL1594S0023	94	103	79	352	184	279	2.86	3.16	2.37	12.94	6.86	10.24	2.79667	10.0133	1.84014	2.61674e-21	3.50132e-20	up
CIL1358S0047	40	31	62	117	161	112	3.49	2.73	5.33	12.34	17.22	11.79	3.85	13.7833	1.83999	1.75198e-10	9.18223e-10	up
MSTRG.17149	2458	2004	2332	3072	9491	7832	103.03	84.33	92.88	151.74	476.17	374.85	93.4133	334.253	1.83924	5.03011e-08	1.99895e-07	up
CIL1436S0001	93	83	89	287	245	248	4.23	3.8	3.99	15.77	13.65	13.59	4.00667	14.3367	1.83924	2.05245e-38	7.40805e-37	up
MSTRG.4054	19	9	18	79	46	10	1.77	0.84	1.65	8.88	5.24	1.12	1.42	5.08	1.83894	0.000783581	0.00171038	up
CIL0942S0211	514	590	595	2179	785	2044	12.75	14.76	14.56	65.36	23.89	61.18	14.0233	50.1433	1.83823	1.29025e-12	8.3937e-12	up
MSTRG.22121	12	6	9	15	44	20	0.76	0.39	0.57	1.16	3.44	1.54	0.573333	2.04667	1.83583	0.00015954	0.000390076	up
CIL0923S0038	10	7	3	23	18	18	0.36	0.25	0.11	1	0.79	0.78	0.24	0.856667	1.8357	1.50086e-05	4.2676e-05	up
CIL1226S0043	242	315	238	792	535	1008	12.09	15.86	11.72	47.82	32.77	60.74	13.2233	47.11	1.83295	3.04336e-20	3.7543e-19	up
CIL0897S0053	5	10	18	45	21	28	0.34	0.67	1.21	3.77	1.79	2.34	0.74	2.63333	1.83129	1.76578e-05	4.97756e-05	up
CIL0940S0104	454	366	355	1463	764	1213	20.72	16.85	15.98	80.74	42.77	66.8	17.85	63.4367	1.82939	3.19463e-26	6.00027e-25	up
CIL0244S0005	543	593	640	1184	1961	2038	34.22	37.64	39.76	90.12	151.43	154.79	37.2067	132.113	1.82814	5.55166e-15	4.55409e-14	up
MSTRG.8497	40	48	73	215	93	163	1.82	2.18	3.24	11.72	5.15	8.83	2.41333	8.56667	1.82771	1.70594e-11	9.97398e-11	up
CIL1354S0022	11	15	10	14	55	36	0.5	0.68	0.45	0.77	3.05	1.96	0.543333	1.92667	1.8262	0.000126788	0.000314617	up
CIL1499S0022	149	130	148	184	619	439	9.73	8.56	9.53	14.52	49.55	34.57	9.27333	32.88	1.82605	4.58222e-07	1.60999e-06	up
MSTRG.12843	460	293	270	458	1444	1069	9.7	6.23	5.62	11.68	37.35	27.2	7.18333	25.41	1.82267	6.52045e-07	2.24754e-06	up
CIL1293S0034	48	52	52	148	193	100	3.66	4	3.91	13.68	18.02	9.2	3.85667	13.6333	1.82171	7.18754e-11	3.92486e-10	up
CIL1346S0021	121	146	113	457	285	362	9.06	11.03	8.35	41.39	26.18	32.72	9.48	33.43	1.81818	9.4043e-29	2.02585e-27	up
CIL1025S0111	614	635	729	392	4376	922	17.01	17.74	19.92	13.13	148.7	30.82	18.2233	64.2167	1.81716	0.00131269	0.00275779	up
CIL0919S0103	853	864	994	2046	3822	1957	17.66	18.04	20.3	51.23	97.07	48.89	18.6667	65.73	1.81609	1.61929e-10	8.51618e-10	up
CIL0318S0013	16	5	11	41	13	39	0.95	0.3	0.64	2.93	0.94	2.78	0.63	2.21667	1.81497	6.17565e-05	0.000160774	up
MSTRG.26464	628	615	780	1201	3432	1184	29.14	28.78	35.69	67.39	195.33	66.29	31.2033	109.67	1.8134	1.65729e-06	5.40771e-06	up
CIL1215S0013	92	103	119	330	237	338	5.91	6.67	7.54	25.63	18.67	26.2	6.70667	23.5	1.80899	2.63858e-34	7.56598e-33	up
CIL0982S0018	390	399	429	1147	1009	1355	8.22	8.48	8.92	29.23	26.08	34.46	8.54	29.9233	1.80896	5.18682e-52	3.58864e-50	up
CIL0925S0053	10	9	9	34	24	23	0.72	0.65	0.64	2.94	2.11	1.99	0.67	2.34667	1.80838	6.36991e-08	2.49602e-07	up
CIL0912S0031	478	450	483	1849	1144	1070	16.58	15.74	16.52	77.55	48.67	44.78	16.28	57	1.80786	2.4981e-25	4.40058e-24	up
CIL1245S0045	2030	2572	2807	8513	6677	6124	87.76	112.13	119.67	444.98	354.02	319.42	106.52	372.807	1.8073	1.28464e-28	2.74443e-27	up
CIL1562S0004	91	119	154	670	174	203	2.43	3.2	4.05	21.62	5.69	6.54	3.22667	11.2833	1.80608	3.36401e-06	1.04963e-05	up
MSTRG.28734	71	76	87	265	124	283	0.64	0.69	0.77	2.89	1.37	3.08	0.7	2.44667	1.80539	1.90311e-14	1.47355e-13	up
MSTRG.4572	25	24	27	54	45	120	0.85	0.83	0.91	2.23	1.88	4.94	0.863333	3.01667	1.80497	8.19165e-08	3.16612e-07	up
CIL0990S0042	18	20	26	15	106	62	0.67	0.75	0.96	0.68	4.84	2.79	0.793333	2.77	1.80389	0.00049798	0.00112416	up
CIL1313S0010	5	17	27	64	20	57	0.15	0.51	0.79	2.29	0.73	2.04	0.483333	1.68667	1.80308	0.000263333	0.000622101	up
CIL0945S0093	31	27	37	137	14	122	3.52	3.09	4.14	18.82	1.95	16.72	3.58333	12.4967	1.80217	0.000566401	0.00126753	up
CIL1147S0035	85	65	55	244	77	268	6.06	4.67	3.87	21.03	6.73	23.05	4.86667	16.9367	1.79914	8.33256e-08	3.21673e-07	up
CIL0982S0008	1320	1355	1176	5042	2963	3029	83.04	85.96	72.96	383.52	228.61	229.91	80.6533	280.68	1.79912	2.30876e-25	4.08097e-24	up
CIL0908S0012	3	2	3	10	9	4	0.28	0.19	0.28	1.13	1.03	0.45	0.25	0.87	1.79909	0.00396317	0.00762924	up
CIL1081S0074	960	1146	854	3748	1557	3183	22.2	26.73	19.48	104.8	44.16	88.81	22.8033	79.2567	1.79729	3.97028e-15	3.2981e-14	up
CIL1130S0058	159	145	141	517	257	499	6.53	6	5.71	25.67	12.94	24.72	6.08	21.11	1.79578	1.76016e-20	2.204e-19	up
CIL1086S0062	620	681	536	1544	1779	1923	19.47	21.56	16.6	58.62	68.51	72.85	19.21	66.66	1.79496	3.73098e-26	6.9924e-25	up
CIL1113S0038	198	236	206	798	356	675	7.6	9.13	7.79	37.02	16.75	31.24	8.17333	28.3367	1.79367	9.33079e-18	9.6166e-17	up
CIL0150S0012	522	409	656	384	2702	1409	34.23	27.05	42.42	30.45	217.33	111.49	34.5667	119.757	1.79265	0.000147986	0.000363757	up
CIL0957S0146	116	78	94	169	375	274	13.64	9.25	10.9	24.04	54.1	38.88	11.2633	39.0067	1.79209	4.2084e-09	1.89805e-08	up
CIL1230S0026	954	878	1217	959	5977	1682	116.97	108.56	147.14	142.16	898.74	248.81	124.223	429.903	1.79108	0.000207639	0.000498516	up
CIL1456S0021	5	13	7	13	42	16	0.15	0.4	0.21	0.48	1.56	0.59	0.253333	0.876667	1.79099	0.000915124	0.00197463	up
CIL0909S0149	29	30	39	141	66	72	1.03	1.07	1.36	6.03	2.86	3.07	1.15333	3.98667	1.78937	8.10805e-11	4.40608e-10	up
CIL1084S0073	569	664	994	3903	1327	1090	13.64	16.05	23.5	113.12	39.01	31.52	17.73	61.2167	1.78773	9.32387e-07	3.13799e-06	up
CIL0218S0026	4	6	9	31	9	14	0.25	0.38	0.56	2.35	0.69	1.06	0.396667	1.36667	1.78466	0.000387643	0.000891335	up
CIL1021S0019	222	150	195	607	586	411	28.85	19.66	24.99	95.36	93.39	64.43	24.5	84.3933	1.78435	1.25619e-17	1.27984e-16	up
CIL1455S0001	251	212	196	527	837	497	15.91	13.58	12.24	40.39	65.12	38.03	13.91	47.8467	1.7823	3.39555e-12	2.11767e-11	up
CIL1342S0046	226	323	474	1160	680	1051	9.67	13.94	20.01	60.04	35.7	54.28	14.54	50.0067	1.78209	6.86404e-14	5.06549e-13	up
CIL1028S0010	169	236	209	1452	104	185	3.76	5.3	4.59	39.08	2.84	4.97	4.55	15.63	1.78038	0.00427344	0.00817227	up
CIL0259S0009	7	7	14	41	19	19	0.58	0.58	1.14	4.09	1.92	1.89	0.766667	2.63333	1.78022	1.64107e-05	4.64172e-05	up
CIL1131S0022	2	3	2	5	11	4	0.15	0.23	0.15	0.45	1.01	0.36	0.176667	0.606667	1.77987	0.00889092	0.0159749	up
CIL0962S0080	5	3	11	14	34	5	0.55	0.34	1.2	1.88	4.62	0.67	0.696667	2.39	1.77847	0.00625305	0.0115671	up
[truncated: 9,978 more rows]

## Sheet: Table S4
Table S4 Function annotation of DEGs
id	P1	A1	log2(A1/P1)	P-Value	FDR	Symbol	Description	KEGG_A_class	KEGG_B_class	Pathway	K_ID	GO Component	GO Function	GO Process
MSTRG.19088	8.04	0.266667	-4.91409	3.13355e-24	5.15079e-23	--	1-phosphatidylinositol 4,5-bisphosphate phosphodiesterase beta-1 [Gossypium australe]	-	-	-	-	-	-	GO:0044699//single-organism process
MSTRG.18208	0.176667	1.68667	3.25507	8.10249e-11	4.40398e-10	--	37S ribosomal protein [Actinidia chinensis var. chinensis] [Actinidia chinensis]	-	-	-	-	GO:0043231//intracellular membrane-bounded organelle	GO:0005319//lipid transporter activity;GO:0008289//lipid binding	GO:0006869//lipid transport
MSTRG.17150	177.573	949.59	2.41889	1.1336e-08	4.86446e-08	fabG	3-oxoacyl-[acyl-carrier-protein] reductase FabG [Morella rubra]	-	-	-	-	-	GO:0003824//catalytic activity	GO:0010038//response to metal ion;GO:0044710//single-organism metabolic process
MSTRG.17149	93.4133	334.253	1.83924	5.03011e-08	1.99895e-07	fabG	3-oxoacyl-[acyl-carrier-protein] reductase FabG [Morella rubra]	-	-	-	-	-	GO:0003824//catalytic activity	GO:0010038//response to metal ion;GO:0044710//single-organism metabolic process
CIL0715S0001	0.001	0.58	9.17991	0.00157227	0.00325848	--	6,7-dimethyl-8-ribityllumazine synthase [Theobroma cacao]	-	-	-	-	-	-	-
MSTRG.17843	10.02	2.1	-2.25442	0.000107207	0.000268585	RPL26A	60S ribosomal protein L26-2-like [Asparagus officinalis]	Genetic Information Processing	Translation	ko03010//Ribosome	K02898	GO:0009536//plastid;GO:0015934//large ribosomal subunit;GO:0031090//organelle membrane	GO:0005198//structural molecule activity;GO:0005488//binding	GO:0006950//response to stress;GO:0009451//RNA modification;GO:0010467//gene expression
CIL1308S0017	17.0967	4.21667	-2.01954	7.72021e-09	3.3723e-08	--	A_thal_3526 domain-containing protein [Cephalotus follicularis]	-	-	-	-	-	-	-
CIL1562S0002	23.6833	7.82667	-1.5974	0.000474667	0.00107454	--	A_thal_3526 domain-containing protein [Cephalotus follicularis]	-	-	-	-	-	-	-
CIL0155S0025	1.67333	0.0566667	-4.88408	0.000404214	0.000927168	--	A_TM021B04.11 protein [Theobroma cacao]	-	-	-	-	-	-	GO:0044699//single-organism process
CIL0347S0004	15.9367	0.546667	-4.86554	4.12154e-28	8.58472e-27	--	Abhydrolase_6 domain-containing protein [Cephalotus follicularis]	-	-	-	-	-	-	-
CIL1265S0062	6.98667	15.8233	1.17938	4.617e-12	2.8437e-11	--	Abhydrolase_6 domain-containing protein [Cephalotus follicularis]	-	-	-	-	-	GO:0003824//catalytic activity	-
CIL1265S0087	3.46	0.306667	-3.49603	1.62308e-06	5.30147e-06	MES17	Abhydrolase_6 domain-containing protein [Cephalotus follicularis]	-	-	-	-	-	GO:0052689//carboxylic ester hydrolase activity	-
MSTRG.29062	9.67667	2.15667	-2.16571	0.000256282	0.000606776	--	AC9 transposase [Actinidia chinensis var. chinensis] [Actinidia chinensis]	-	-	-	-	-	-	-
CIL1520S0031	0.001	12.02	13.5531	1.36458e-11	8.04379e-11	--	acetyltransferase (GNAT) domain protein [Medicago truncatula]	-	-	-	-	-	-	-
MSTRG.10680	1.22667	0.0566667	-4.4361	0.00162417	0.00335642	--	Actin cytoskeleton-regulatory complex protein [Actinidia chinensis var. chinensis] [Actinidia chinensis]	-	-	-	-	GO:0016020//membrane;GO:0043231//intracellular membrane-bounded organelle;GO:0044444//cytoplasmic part	GO:0005488//binding	-
MSTRG.26248	3.78667	0.293333	-3.69032	1.921e-08	8.00373e-08	--	actin cytoskeleton-regulatory complex protein PAN1-like [Pyrus ussuriensis x Pyrus communis]	-	-	-	-	-	-	-
CIL1582S0020	209.133	44.3033	-2.23894	1.62126e-43	7.64897e-42	ACT7	actin-7 [Ziziphus jujuba]	-	-	-	-	-	GO:0017111//nucleoside-triphosphatase activity;GO:0032550//purine ribonucleoside binding	-
MSTRG.6937	6.25667	0.88	-2.82982	2.07574e-05	5.79056e-05	ADF1	actin-depolymerizing factor 2 [Prosopis alba]	-	-	-	-	GO:0005856//cytoskeleton	GO:0008092//cytoskeletal protein binding	GO:0002218//activation of innate immune response;GO:0008154//actin polymerization or depolymerization;GO:0009617//response to bacterium
CIL1495S0023	12.3667	5.00667	-1.30453	0.00566646	0.0105837	trmL	AGAMOUS-like 26 isoform 1 [Theobroma cacao]	-	-	-	-	GO:0043231//intracellular membrane-bounded organelle	GO:0003676//nucleic acid binding;GO:0005515//protein binding;GO:0008168//methyltransferase activity	GO:0010468//regulation of gene expression;GO:0034645//cellular macromolecule biosynthetic process
MSTRG.19073	0.976667	0.001	-9.93172	0.000642973	0.00142419	AP1	Agamous-like MADS-box protein AGL8 [Cajanus cajan]	-	-	-	-	GO:0043231//intracellular membrane-bounded organelle	GO:0001071//nucleic acid binding transcription factor activity;GO:0003676//nucleic acid binding;GO:0005515//protein binding;GO:0016628//oxidoreductase activity, acting on the CH-CH group of donors, NAD or NADP as acceptor	GO:0009718//anthocyanin-containing compound biosynthetic process;GO:0009909//regulation of flower development;GO:0010074//maintenance of meristem identity;GO:0010468//regulation of gene expression;GO:0034645//cellular macromolecule biosynthetic process
CIL1332S0028	2.82667	6.41667	1.18272	7.34451e-17	7.0148e-16	--	agenet domain-containing family protein [Populus trichocarpa]	-	-	-	-	-	-	-
CIL0392S0006	7.92333	0.713333	-3.47346	8.39064e-10	4.0972e-09	--	AhpC-TSA domain-containing protein [Cephalotus follicularis]	-	-	-	-	-	GO:0003824//catalytic activity	GO:0044710//single-organism metabolic process
CIL1332S0017	13.26	3.23667	-2.0345	1.56618e-06	5.12373e-06	At2g34160	Alba DNA/RNA-binding protein [Theobroma cacao]	-	-	-	-	-	-	-
CIL1315S0035	25.14	57.05	1.18224	7.65331e-15	6.19733e-14	--	Aldehyde dehydrogenase [Gossypium arboreum]	-	-	-	-	-	-	GO:0050896//response to stimulus
CIL0331S0011	5.46	2.14	-1.35129	0.0297716	0.0479538	--	Aldehyde dehydrogenase [Gossypium arboreum]	-	-	-	-	-	-	-
CIL1494S0019	13.6867	66.6967	2.28484	5.91076e-32	1.48818e-30	--	Aldose 1-epimerase family protein isoform 1 [Theobroma cacao]	Metabolism;Metabolism;Metabolism	Global and overview maps;Global and overview maps;Carbohydrate metabolism	ko01100//Metabolic pathways;ko01110//Biosynthesis of secondary metabolites;ko00010//Glycolysis / Gluconeogenesis	K01792;K01792;K01792	-	GO:0003824//catalytic activity;GO:0005488//binding	GO:0044238//primary metabolic process
CIL1445S0007	8.6	1.45333	-2.56497	8.55375e-11	4.63559e-10	--	Aldose_epim domain-containing protein [Cephalotus follicularis]	Metabolism;Metabolism;Metabolism	Global and overview maps;Global and overview maps;Carbohydrate metabolism	ko01100//Metabolic pathways;ko01110//Biosynthesis of secondary metabolites;ko00010//Glycolysis / Gluconeogenesis	K01792;K01792;K01792	-	GO:0003824//catalytic activity;GO:0005488//binding	GO:0044238//primary metabolic process
MSTRG.17508	1.32	2.80667	1.08832	0.0021551	0.00436346	--	Alpha/beta hydrolase fold [Trema orientale]	-	-	-	-	-	-	-
CIL0347S0003	13.98	5.07	-1.46331	0.000345304	0.000801299	--	Alpha/beta-Hydrolases superfamily protein isoform 1 [Theobroma cacao]	-	-	-	-	-	GO:0003824//catalytic activity	-
CIL1444S0017	4.76333	1.03	-2.20933	1.63621e-06	5.34293e-06	ynbB	Alum_res domain-containing protein [Cephalotus follicularis]	-	-	-	-	-	GO:0043168//anion binding	-
MSTRG.20205	1.14	0.266667	-2.09592	0.0118068	0.020708	--	Amino acid transporter AVT1J [Vitis vinifera]	-	-	-	-	-	-	-
MSTRG.4223	0.01	5.74333	9.16574	3.09146e-17	3.04509e-16	--	Amino-acid racemase isoform 2 [Theobroma cacao]	-	-	-	-	-	-	-
MSTRG.8526	89.5767	1.56	-5.84351	4.65802e-47	2.53606e-45	DSC2	aminopeptidase M1-like [Quercus suber]	Metabolism;Metabolism;Metabolism;Metabolism;Metabolism	Global and overview maps;Global and overview maps;Lipid metabolism;Lipid metabolism;Metabolism of cofactors and vitamins	ko01100//Metabolic pathways;ko01212//Fatty acid metabolism;ko00061//Fatty acid biosynthesis;ko01040//Biosynthesis of unsaturated fatty acids;ko00780//Biotin metabolism	K00059;K00059;K00059;K00059;K00059	-	-	-
MSTRG.14035	2.63667	0.001	-11.3645	5.06172e-13	3.4421e-12	--	Ankyrin repeat family protein [Prunus dulcis]	-	-	-	-	-	-	-
MSTRG.21900	6.97	1.98333	-1.81323	0.0206149	0.0343297	--	Ankyrin repeat family protein [Prunus dulcis]	-	-	-	-	-	-	-
CIL1448S0023	1.64667	0.35	-2.23412	0.00130897	0.00275065	--	Ankyrin repeat-containing protein [Morus notabilis]	-	-	-	-	-	-	-
MSTRG.8232	10.65	4.3	-1.30844	0.0244872	0.0401461	--	ankyrin repeat-containing protein ITN1-like [Quercus lobata]	-	-	-	-	-	-	-
MSTRG.5621	21.53	0.406667	-5.72636	1.5065e-19	1.77445e-18	--	ankyrin repeat-containing protein NPR4-like [Quercus lobata]	-	-	-	-	-	-	-
MSTRG.13195	5.26	0.84	-2.6466	2.55697e-05	7.04245e-05	--	AP-4 complex subunit mu-like [Olea europaea var. sylvestris] [Olea europaea]	-	-	-	-	-	-	-
CIL1468S0013	15.4333	46.03	1.57652	0.00760448	0.0138467	AGP16	Arabinogalactan peptide 20, partial [Noccaea caerulescens]	-	-	-	-	-	-	-
CIL1367S0016	0.0666667	1.09333	4.03562	0.000202257	0.000486453	--	Argininosuccinate lyase [Gossypium arboreum]	-	-	-	-	-	-	-
CIL0277S0006	3.58333	0.75	-2.25634	9.85834e-06	2.87701e-05	AGO5	argonaute family protein [Populus trichocarpa]	-	-	-	-	-	-	-
CIL1469S0027	0.38	0.07	-2.44057	0.0300707	0.0483962	PUB44	Arm domain-containing protein/U-box domain-containing protein [Cephalotus follicularis]	-	-	-	-	-	GO:0019787//ubiquitin-like protein transferase activity	GO:0032446//protein modification by small protein conjugation
CIL1502S0002	5.10333	0.266667	-4.25833	3.36471e-13	2.33172e-12	APX2	Ascorbate peroxidase 6 [Theobroma cacao]	Metabolism;Metabolism	Metabolism of other amino acids;Carbohydrate metabolism	ko00480//Glutathione metabolism;ko00053//Ascorbate and aldarate metabolism	K00434;K00434	-	GO:0005488//binding;GO:0016491//oxidoreductase activity	GO:0044710//single-organism metabolic process
CIL0366S0002	1.42333	0.333333	-2.09424	0.00679403	0.0124917	--	Asp_Glu_race domain-containing protein [Cephalotus follicularis]	-	-	-	-	-	GO:0016855//racemase and epimerase activity, acting on amino acids and derivatives	-
CIL1327S0002	4.49667	0.3	-3.90582	4.24404e-13	2.90829e-12	--	AT_hook domain-containing protein [Cephalotus follicularis]	-	-	-	-	-	-	-
CIL1547S0030	14.3267	2.75667	-2.37771	1.41193e-11	8.31341e-11	--	At1g55340 [Arabidopsis thaliana]	-	-	-	-	GO:0043231//intracellular membrane-bounded organelle	-	-
CIL1300S0038	1.48667	0.0166667	-6.47897	9.67823e-06	2.82765e-05	--	AT5G50150 [Arabidopsis thaliana]	-	-	-	-	-	-	-
CIL1543S0012	10.67	34.78	1.7047	2.08369e-09	9.73456e-09	ALA10	ATPase E1-E2 type family protein / haloacid dehalogenase-like hydrolase family protein [Theobroma cacao]	-	-	-	-	GO:0031224//intrinsic component of membrane	GO:0003824//catalytic activity;GO:0005548//phospholipid transporter activity;GO:0032550//purine ribonucleoside binding;GO:0046872//metal ion binding	GO:0015914//phospholipid transport
CIL1587S0013	5.69	1.6	-1.83036	1.31487e-05	3.76989e-05	Atad5	ATPase family AAA domain-containing protein 5 [Morus notabilis]	-	-	-	-	-	-	-
CIL1587S0012	7.34	2.09333	-1.80998	0.0016156	0.00333978	--	ATPase, AAA-type, core [Corchorus capsularis]	-	-	-	-	-	-	-
MSTRG.16739	0.25	0.84	1.74846	0.00343968	0.00670351	FTSH3	ATP-dependent zinc metalloprotease FTSH 8, mitochondrial [Elaeis guineensis]	-	-	-	-	GO:0016020//membrane;GO:0044434//chloroplast part	GO:0016787//hydrolase activity	GO:0009725//response to hormone
MSTRG.24708	64.1633	260.68	2.02246	3.25662e-19	3.74359e-18	--	auxin-regulated protein involved in organ size-like [Pyrus ussuriensis x Pyrus communis]	-	-	-	-	-	-	-
CIL0489S0009	0.726667	0.0333333	-4.44626	0.0119653	0.0209647	--	B3 domain-containing protein [Cephalotus follicularis]	-	-	-	-	-	-	-
CIL1390S0031	4.81333	12.9767	1.43081	7.80541e-06	2.30791e-05	--	B-cell receptor-associated-like protein [Arabidopsis thaliana]	-	-	-	-	GO:0031224//intrinsic component of membrane;GO:0043231//intracellular membrane-bounded organelle	-	GO:0006006//glucose metabolic process;GO:0015031//protein transport
CIL1405S0071	5.26	0.483333	-3.44397	1.12104e-11	6.66758e-11	BGLU25	Beta glucosidase 41 isoform 2 [Theobroma cacao]	Metabolism;Metabolism;Metabolism;Metabolism;Metabolism	Global and overview maps;Global and overview maps;Biosynthesis of other secondary metabolites;Carbohydrate metabolism;Metabolism of other amino acids	ko01100//Metabolic pathways;ko01110//Biosynthesis of secondary metabolites;ko00940//Phenylpropanoid biosynthesis;ko00500//Starch and sucrose metabolism;ko00460//Cyanoamino acid metabolism	K01188;K01188;K01188;K01188;K01188	GO:0005618//cell wall	GO:0015926//glucosidase activity	GO:0044238//primary metabolic process
MSTRG.15836	123.31	0.32	-8.59	3.10488e-20	3.82653e-19	BGAL3	beta-galactosidase 3 [Prunus dulcis]	-	-	-	-	-	-	-
MSTRG.13976	5.04333	91.9	4.18762	1.22296e-58	1.14767e-56	--	Beta-lactamase-like protein [Corchorus capsularis]	-	-	-	-	-	GO:0016740//transferase activity	-
CIL1420S0025	1576.43	50.1933	-4.97302	4.72212e-29	1.03012e-27	TPRP-F1	Bifunctional inhibitor/lipid-transfer protein/seed storage 2S albumin superfamily protein [Arabidopsis thaliana]	-	-	-	-	-	-	-
CIL1424S0039	1.45667	0.06	-4.60156	1.10478e-08	4.74551e-08	ABCB2	BnaA03g47690D [Brassica napus]	Environmental Information Processing	Membrane transport	ko02010//ABC transporters	K05658	-	-	-
CIL1365S0013	16.4733	2.05333	-3.00409	2.15359e-11	1.24502e-10	--	BnaA06g38910D [Brassica napus]	-	-	-	-	-	-	-
CIL1326S0006	0.0733333	1.83333	4.64386	1.35567e-07	5.07446e-07	--	BnaC03g21390D [Brassica napus]	-	-	-	-	-	-	-
CIL1618S0016	40.8267	7.93	-2.36412	0.00821964	0.0148703	At1g07170	BnaC04g40780D [Brassica napus]	Genetic Information Processing	Transcription	ko03040//Spliceosome	K12834	GO:0005681//spliceosomal complex	-	GO:0000377//RNA splicing, via transesterification reactions with bulged adenosine as nucleophile
CIL1550S0013	1.70667	0.0633333	-4.75207	5.82575e-11	3.21525e-10	--	BRCT domain-containing protein [Cephalotus follicularis]	-	-	-	-	-	-	-
CIL1497S0040	1.69667	0.0933333	-4.18417	6.85092e-11	3.74977e-10	--	Bromo-adjacent domain-containing protein [Theobroma cacao]	-	-	-	-	-	-	-
MSTRG.9373	0.001	0.74	9.53138	1.4743e-06	4.83386e-06	--	bromodomain and WD repeat-containing protein 1-like isoform X1 [Lactuca sativa]	-	-	-	-	-	-	-
CIL1282S0016	1.92	6.53667	1.76745	1.5288e-17	1.54599e-16	--	Bromodomain-containing 8 [Gossypium arboreum]	-	-	-	-	-	-	-
CIL1498S0009	44.71	11.4067	-1.97072	7.73344e-15	6.25633e-14	--	BSD domain-containing family protein [Populus tomentosa]	-	-	-	-	-	-	-
CIL1303S0043	26.48	6.47	-2.03307	7.44979e-09	3.26412e-08	--	BSD domain-containing protein [Cephalotus follicularis]	-	-	-	-	-	GO:0008236//serine-type peptidase activity	GO:0019538//protein metabolic process
MSTRG.20788	5.71667	2.15333	-1.4086	0.029725	0.0478904	At3g05675	BTB/POZ domain-containing protein At3g05675 isoform X1 [Medicago truncatula]	-	-	-	-	-	-	-
CIL0293S0022	5.34667	1.93667	-1.46506	0.00242713	0.00486651	BZIP06	bZIP_1 domain-containing protein [Cephalotus follicularis]	-	-	-	-	-	-	-
CIL1483S0021	95.8567	27.95	-1.77803	7.83082e-09	3.41715e-08	--	C2 domain-containing family protein [Populus trichocarpa]	-	-	-	-	-	-	-
CIL1434S0023	18.75	1.88333	-3.31553	2.04773e-38	7.40137e-37	CSI1	C2 domain-containing protein/Arm domain-containing protein [Cephalotus follicularis]	-	-	-	-	-	GO:0003824//catalytic activity	-
CIL1425S0018	9.66333	0.0666667	-7.17941	8.64657e-18	8.93283e-17	--	C2H2-like zinc finger protein [Theobroma cacao]	-	-	-	-	-	GO:0043169//cation binding	-
CIL1290S0028	2.04667	0.673333	-1.60388	0.0280785	0.045505	--	CAAX amino terminal protease family [Cucumis melo subsp. melo] [Cucumis melo]	-	-	-	-	-	GO:0016787//hydrolase activity	GO:0006568//tryptophan metabolic process;GO:0009683//indoleacetic acid metabolic process
MSTRG.13996	2.53	0.001	-11.3049	4.67804e-11	2.60973e-10	--	CACTA en-spm transposon protein [Cucumis melo var. makuwa] [Cucumis melo]	-	-	-	-	-	-	-
MSTRG.9019	4.17	0.57	-2.87101	0.00464142	0.00881067	--	calcineurin subunit B-like [Quercus suber]	-	-	-	-	GO:0043231//intracellular membrane-bounded organelle	GO:0046872//metal ion binding	GO:0006928//movement of cell or subcellular component;GO:0051640//organelle localization
CIL0294S0006	4.65667	0.001	-12.1851	2.42837e-09	1.12411e-08	--	calcineurin-like metallo-phosphoesterase superfamily protein [Medicago truncatula]	-	-	-	-	-	-	-
CIL1283S0045	2.1	6.45333	1.61966	3.00937e-08	1.22627e-07	--	Calcium-binding EF-hand [Corchorus capsularis]	-	-	-	-	GO:0043231//intracellular membrane-bounded organelle	-	-
CIL1618S0025	1.05333	0.001	-10.0407	0.00100471	0.00215335	--	Calcium-binding EF-hand [Corchorus capsularis]	-	-	-	-	-	-	-
CIL0616S0001	5.29667	79.3367	3.90483	3.55653e-48	2.01722e-46	--	Calcium-binding EF-hand [Corchorus olitorius]	-	-	-	-	-	-	GO:0009072//aromatic amino acid family metabolic process;GO:0009608//response to symbiont;GO:0009755//hormone-mediated signaling pathway
CIL0411S0007	123.6	894.003	2.8546	1.92787e-25	3.42413e-24	--	Calcium-binding EF-hand family protein [Arabidopsis thaliana]	-	-	-	-	-	-	-
CIL1545S0026	4.92333	1.23	-2.00098	0.000241987	0.000574937	--	calcium-dependent phosphotriesterase superfamily protein [Medicago truncatula]	-	-	-	-	-	-	-
CIL1367S0015	7.82	24.08	1.62259	0.000125055	0.000310496	--	CAMP-regulated phosphoprotein 19-related protein isoform 1 [Theobroma cacao]	-	-	-	-	-	-	-
MSTRG.631	17.7933	6.26	-1.5071	2.47639e-05	6.83071e-05	--	casein kinase 1-like protein HD16 [Pistacia vera]	-	-	-	-	-	GO:0004672//protein kinase activity;GO:0032550//purine ribonucleoside binding	GO:0006486//protein glycosylation;GO:0006796//phosphate-containing compound metabolic process
CIL1431S0028	0.686667	0.001	-9.42347	0.00878132	0.0158077	HD16	casein kinase I-like protein [Medicago truncatula]	-	-	-	-	-	GO:0004672//protein kinase activity	GO:0006796//phosphate-containing compound metabolic process
MSTRG.5381	21.9333	1.42333	-3.94578	1.46299e-30	3.47336e-29	RPPL1	CC-NBS-LRR protein [Quercus suber]	-	-	-	-	-	-	-
MSTRG.24678	21.8633	3.27	-2.74115	1.99063e-27	3.99473e-26	RPPL1	CC-NBS-LRR protein [Quercus suber]	-	-	-	-	-	-	-
MSTRG.5383	3.82667	0.873333	-2.13148	7.37652e-12	4.45508e-11	RPPL1	CC-NBS-LRR protein [Quercus suber]	-	-	-	-	-	-	-
MSTRG.24679	14.2833	3.30333	-2.11234	1.00162e-09	4.84512e-09	RPPL1	CC-NBS-LRR protein [Quercus suber]	-	-	-	-	-	-	-
MSTRG.9330	1.04667	0.19	-2.46173	0.000581471	0.0012982	RPPL1	CC-NBS-LRR protein [Quercus suber]	-	-	-	-	-	-	-
MSTRG.5382	0.483333	0.0366667	-3.72048	0.00812874	0.0147213	RPPL1	CC-NBS-LRR protein [Quercus suber]	-	-	-	-	-	-	-
MSTRG.19455	2.39333	28.4633	3.57201	8.49518e-19	9.46202e-18	--	CDP-diacylglycerol-glycerol-3-phosphate 3-phosphatidyltransferase [Parasponia andersonii]	-	-	-	-	-	-	GO:0006952//defense response;GO:0007165//signal transduction;GO:0051707//response to other organism;GO:0071310//cellular response to organic substance;GO:1901700//response to oxygen-containing compound
MSTRG.19454	6.11333	56.5233	3.20882	1.2499e-15	1.08497e-14	--	CDP-diacylglycerol-glycerol-3-phosphate 3-phosphatidyltransferase [Parasponia andersonii]	-	-	-	-	-	-	GO:0006952//defense response;GO:0007165//signal transduction;GO:0051707//response to other organism;GO:0071310//cellular response to organic substance;GO:1901700//response to oxygen-containing compound
CIL1416S0005	12.8967	155.227	3.58931	2.35662e-23	3.63089e-22	--	Cellulase protein [Theobroma cacao]	-	-	-	-	-	GO:0016787//hydrolase activity	GO:0044238//primary metabolic process
CIL0216S0001	0.263333	0.001	-8.04075	0.000818275	0.00177994	CESA4	cellulose synthase [Betula luminifera]	-	-	-	-	-	-	-
MSTRG.20031	2.24	0.001	-11.1293	1.10302e-07	4.18552e-07	ATJ10	chaperone protein dnaJ 10-like isoform X1 [Ananas comosus]	-	-	-	-	GO:0043231//intracellular membrane-bounded organelle	-	GO:0007165//signal transduction;GO:0016192//vesicle-mediated transport;GO:0044267//cellular protein metabolic process;GO:0048528//post-embryonic root development
MSTRG.21061	4.36333	38.7433	3.15045	9.03184e-27	1.74857e-25	--	Chemoreceptor A [Gossypium arboreum]	-	-	-	-	-	-	-
CIL1584S0006	23.1333	3.72333	-2.63531	3.41834e-24	5.60821e-23	CLC-C	chloride channel-like family protein [Populus trichocarpa]	-	-	-	-	GO:0034702//ion channel complex	GO:0005254//chloride channel activity;GO:0017076//purine nucleotide binding	GO:0006821//chloride transport;GO:0034765//regulation of ion transmembrane transport
MSTRG.6619	37.1967	7	-2.40975	0.000117553	0.000292685	CEQORH	chloroplast envelope quinone oxidoreductase homolog [Quercus lobata]	-	-	-	-	GO:0009528//plastid inner membrane;GO:0044434//chloroplast part	GO:0003824//catalytic activity;GO:0046914//transition metal ion binding	GO:0044710//single-organism metabolic process
MSTRG.6618	0.97	2.03333	1.06779	0.000198134	0.000477427	CEQORH	chloroplast envelope quinone oxidoreductase homolog [Quercus lobata]	-	-	-	-	GO:0009528//plastid inner membrane;GO:0044434//chloroplast part	GO:0003824//catalytic activity;GO:0046914//transition metal ion binding	GO:0044710//single-organism metabolic process
MSTRG.13738	8.17	26.54	1.69976	2.27155e-28	4.78938e-27	CEQORH	chloroplast envelope quinone oxidoreductase homolog [Quercus suber]	-	-	-	-	GO:0009528//plastid inner membrane;GO:0044434//chloroplast part	GO:0003824//catalytic activity;GO:0046914//transition metal ion binding	GO:0044710//single-organism metabolic process
MSTRG.6620	21.5633	0.27	-6.31948	5.00934e-23	7.56443e-22	CEQORH	chloroplast envelope quinone oxidoreductase homolog [Quercus suber]	-	-	-	-	GO:0009528//plastid inner membrane;GO:0044434//chloroplast part	GO:0003824//catalytic activity;GO:0046914//transition metal ion binding	GO:0044710//single-organism metabolic process
MSTRG.13740	3.32	0.04	-6.37504	1.28262e-07	4.82276e-07	CEQORH	chloroplast envelope quinone oxidoreductase homolog [Quercus suber]	-	-	-	-	GO:0009528//plastid inner membrane;GO:0044434//chloroplast part	GO:0003824//catalytic activity;GO:0046914//transition metal ion binding	GO:0044710//single-organism metabolic process
CIL1264S0066	8.45	63.1967	2.90283	2.86698e-14	2.18512e-13	--	chromatin modification-related protein EAF7-like [Cajanus cajan]	-	-	-	-	-	-	-
CIL1531S0046	9.21667	84.89	3.20328	9.08817e-06	2.66639e-05	--	chromatin modification-related protein EAF7-like [Cajanus cajan]	-	-	-	-	-	-	-
CIL1539S0005	11.26	1.57333	-2.83931	3.37207e-11	1.91175e-10	--	CIA30 domain-containing protein/NAD_binding_10 domain-containing protein [Cephalotus follicularis]	-	-	-	-	-	-	-
CIL0626S0005	12.27	1.61333	-2.92702	9.7171e-23	1.44037e-21	COB	COBRA-like extracellular glycosyl-phosphatidyl inositol-anchored protein family isoform 1 [Theobroma cacao]	-	-	-	-	GO:0031224//intrinsic component of membrane	-	GO:0040007//growth
CIL1479S0003	18.1133	1.96333	-3.20568	6.67105e-14	4.92589e-13	--	conserved hypothetical protein [Ricinus communis]	-	-	-	-	-	-	-
CIL1520S0015	70.11	3.46	-4.34078	7.09123e-08	2.76232e-07	--	conserved hypothetical protein [Ricinus communis]	-	-	-	-	-	-	-
CIL1444S0037	25.79	2.81667	-3.19475	0.000641726	0.00142167	CIP7	COP1-interacting protein 7 [Populus trichocarpa]	-	-	-	-	-	-	-
MSTRG.21020	0.09	1.17667	3.70864	1.53882e-05	4.36977e-05	--	Copia protein [Vitis vinifera]	-	-	-	-	-	-	-
CIL1380S0033	5.55333	0.0366667	-7.24274	2.43387e-07	8.84785e-07	--	C-type mannose receptor 2 [Theobroma cacao]	-	-	-	-	-	-	GO:0003002//regionalization;GO:0003006//developmental process involved in reproduction;GO:0009933//meristem structural organization;GO:0050789//regulation of biological process
CIL1380S0034	1.89	0.001	-10.8842	0.00185647	0.00379816	--	C-type mannose receptor 2 [Theobroma cacao]	-	-	-	-	-	-	GO:0003002//regionalization;GO:0003006//developmental process involved in reproduction;GO:0009933//meristem structural organization;GO:0050789//regulation of biological process
MSTRG.10181	0.001	0.723333	9.49852	0.0136608	0.0236496	--	Cupredoxin [Parasponia andersonii]	-	-	-	-	-	-	-
MSTRG.10182	0.243333	47.4933	7.60865	2.43812e-19	2.83545e-18	--	Cupredoxin [Trema orientale]	-	-	-	-	-	-	-
CIL1325S0059	20.1267	43.1267	1.09947	9.96145e-10	4.82136e-09	--	CW14 protein isoform 1 [Theobroma cacao]	-	-	-	-	-	-	-
CIL1498S0013	9.97333	3.78667	-1.39715	0.00230579	0.00463945	--	Cw7 protein isoform 1 [Theobroma cacao]	-	-	-	-	-	-	-
CIL1265S0056	8.64	0.05	-7.43296	1.30404e-22	1.91539e-21	TCX2	CXC domain-containing protein [Cephalotus follicularis]	-	-	-	-	-	-	-
CIL0156S0009	0.986667	0.001	-9.94642	3.96953e-06	1.22465e-05	CYCB2-3	Cyclin_N domain-containing protein/Cyclin_C domain-containing protein [Cephalotus follicularis]	-	-	-	-	-	-	GO:0007049//cell cycle
MSTRG.6674	2.03667	0.001	-10.992	2.73529e-07	9.87129e-07	--	cyclopropane fatty acid synthase, partial [Trifolium pratense]	-	-	-	-	-	GO:0008757//S-adenosylmethionine-dependent methyltransferase activity	GO:0006629//lipid metabolic process
MSTRG.19150	0.546667	5.33333	3.2863	5.53342e-21	7.23043e-20	CRK10	Cysteine-rich receptor-like protein kinase 10 [Morella rubra]	-	-	-	-	-	GO:0004672//protein kinase activity;GO:0032550//purine ribonucleoside binding	GO:0006464//cellular protein modification process;GO:0016310//phosphorylation
MSTRG.2733	0.001	5.09	12.3134	3.99654e-15	3.31635e-14	--	Cytochrome b5 [Morella rubra]	-	-	-	-	-	-	-
MSTRG.11540	0.01	8.80667	9.78245	3.28274e-13	2.27674e-12	CYP71AU50	Cytochrome P450 [Theobroma cacao]	-	-	-	-	-	GO:0016709//oxidoreductase activity, acting on paired donors, with incorporation or reduction of molecular oxygen, NAD(P)H as one donor, and incorporation of one atom of oxygen;GO:0046906//tetrapyrrole binding;GO:0046914//transition metal ion binding	GO:0044710//single-organism metabolic process
MSTRG.16491	3.15667	0.943333	-1.74256	0.00818104	0.0148046	CYP714C2	cytochrome P450 714C2-like [Quercus lobata]	-	-	-	-	-	GO:0016491//oxidoreductase activity;GO:0046906//tetrapyrrole binding;GO:0046914//transition metal ion binding	GO:0044710//single-organism metabolic process
CIL1387S0025	23.5967	0.133333	-7.4674	1.36241e-22	1.99626e-21	--	Cytosolic Fe-S cluster assembly factor nar-1 [Anthurium amnicola]	-	-	-	-	-	-	-
CIL1498S0018	9.13667	0.001	-13.1575	8.64991e-14	6.31659e-13	CYCD6-1	D6-type cyclin [Populus trichocarpa]	-	-	-	-	-	-	-
CIL0046S0026	0.806667	0.07	-3.52655	3.86837e-05	0.000103883	--	Death-associated protein kinase 1 [Morus notabilis]	-	-	-	-	-	-	-
CIL0176S0006	5.03667	0.103333	-5.60709	3.73195e-19	4.2653e-18	DGUOK	Deoxycytidine kinase [Morus notabilis]	-	-	-	-	GO:0043231//intracellular membrane-bounded organelle	GO:0019206//nucleoside kinase activity	GO:0009117//nucleotide metabolic process;GO:0009124//nucleoside monophosphate biosynthetic process
MSTRG.17134	43.6133	158.313	1.85994	4.68629e-10	2.3497e-09	--	DEVIL-like protein [Trema orientale]	-	-	-	-	GO:0043231//intracellular membrane-bounded organelle	-	GO:0044767//single-organism developmental process
MSTRG.12515	0.001	0.336667	8.39518	0.00831405	0.0150316	--	DEVIL-like protein [Trema orientale]	-	-	-	-	GO:0043231//intracellular membrane-bounded organelle	-	GO:0044767//single-organism developmental process
CIL1259S0009	0.5	0.02	-4.64386	0.00452483	0.00861088	PUMP5	Dicarboxylate carrier 2 [Theobroma cacao]	-	-	-	-	GO:0019866//organelle inner membrane;GO:0031224//intrinsic component of membrane;GO:0043231//intracellular membrane-bounded organelle	GO:0022857//transmembrane transporter activity	GO:0006818//hydrogen transport;GO:0010243//response to organonitrogen compound;GO:0046942//carboxylic acid transport;GO:1902582//single-organism intracellular transport
CIL1374S0034	236.597	30.39	-2.96076	1.17014e-09	5.61713e-09	usf	Dienelactone hydrolase [Corchorus olitorius]	-	-	-	-	GO:0009536//plastid	GO:0016746//transferase activity, transferring acyl groups	-
CIL0130S0005	0.296667	0.001	-8.2127	0.00175988	0.00361171	RXW24L	disease resistance protein (CC-NBS-LRR class) family protein [Medicago truncatula]	-	-	-	-	-	-	-
MSTRG.10318	1.30667	0.0966667	-3.75673	1.75057e-09	8.24698e-09	RPPL1	Disease resistance protein [Corchorus capsularis]	-	-	-	-	-	-	-
CIL1304S0004	3.06333	0.306667	-3.32036	5.86571e-08	2.31074e-07	--	Disease resistance protein [Cynara cardunculus var. scolymus] [Cynara cardunculus]	-	-	-	-	-	-	-
MSTRG.26932	3.10667	1.03	-1.59272	0.0182868	0.0307867	RPPL1	Disease resistance protein [Gossypium australe]	-	-	-	-	-	-	GO:0008152//metabolic process
MSTRG.27984	1.27333	0.196667	-2.69479	6.16058e-07	2.13147e-06	RPPL1	disease resistance protein [Pyrus ussuriensis x Pyrus communis]	-	-	-	-	-	-	-
MSTRG.1519	1.5	0.21	-2.8365	0.000157879	0.000386308	--	disease resistance protein At4g27190-like [Quercus lobata]	-	-	-	-	-	-	-
MSTRG.25490	1.80333	0.276667	-2.70445	0.00258009	0.00514681	--	Disease resistance protein RGA2 [Morella rubra]	-	-	-	-	-	-	-
MSTRG.11392	0.16	1.40667	3.13614	0.00930684	0.0166527	RPPL1	disease resistance protein RGA2-like [Camellia sinensis]	-	-	-	-	-	-	-
MSTRG.26636	16.4533	3.98333	-2.04633	5.41025e-15	4.44657e-14	--	disease resistance protein RGA2-like [Quercus lobata]	-	-	-	-	-	-	-
MSTRG.492	24.6533	3.12333	-2.98062	2.18732e-05	6.07949e-05	RGA4	disease resistance protein RGA2-like [Quercus suber]	-	-	-	-	-	-	-
MSTRG.25476	24.51	6.46667	-1.92228	0.0260849	0.0425359	RGA3	disease resistance protein RGA2-like, partial [Quercus suber]	-	-	-	-	-	-	-
MSTRG.26930	2.83667	0.396667	-2.8382	5.09124e-05	0.000134442	RPPL1	Disease resistance RPP13-like protein [Actinidia chinensis var. chinensis] [Actinidia chinensis]	-	-	-	-	-	-	-
MSTRG.5595	8.95333	0.4	-4.48435	3.7546e-43	1.72718e-41	RPPL1	disease resistance RPP13-like protein 1 [Pyrus ussuriensis x Pyrus communis]	-	-	-	-	-	-	-
MSTRG.13947	4.97667	0.846667	-2.55531	6.83411e-17	6.53941e-16	RPPL1	disease resistance RPP13-like protein 1 [Pyrus ussuriensis x Pyrus communis]	-	-	-	-	-	-	-
MSTRG.4768	0.456667	1.05667	1.21031	1.00088e-05	2.91861e-05	RPPL1	disease resistance RPP13-like protein 1 [Pyrus ussuriensis x Pyrus communis]	-	-	-	-	-	-	-
MSTRG.26656	9.20333	0.5	-4.20216	0.000180585	0.000438072	RPPL1	disease resistance RPP13-like protein 1 [Pyrus ussuriensis x Pyrus communis]	-	-	-	-	-	-	-
MSTRG.26657	16.88	4.6	-1.87561	0.00193641	0.00395044	RPPL1	disease resistance RPP13-like protein 1 [Pyrus ussuriensis x Pyrus communis]	-	-	-	-	-	-	-
CIL0365S0008	7.49333	1.66667	-2.16864	2.0397e-09	9.53942e-09	tag	DNA glycosylase superfamily protein isoform 1 [Theobroma cacao]	Genetic Information Processing	Replication and repair	ko03410//Base excision repair	K01246	-	GO:0043733//DNA-3-methylbase glycosylase activity	GO:0006281//DNA repair;GO:0006305//DNA alkylation
MSTRG.1014	0.723333	0.001	-9.49852	0.0239752	0.039376	--	DNA gyrase subunit A [Hibiscus syriacus]	-	-	-	-	-	-	GO:0009062//fatty acid catabolic process;GO:0009648//photoperiodism
MSTRG.1470	120.773	46.81	-1.36741	0.020082	0.033518	--	DNA helicase [Actinidia chinensis var. chinensis] [Actinidia chinensis]	-	-	-	-	-	-	-
CIL1436S0036	22.3933	1.98333	-3.49707	1.15221e-09	5.53313e-09	LIG4	DNA ligase, ATP-dependent [Corchorus olitorius]	Genetic Information Processing	Replication and repair	ko03450//Non-homologous end-joining	K10777	-	-	-
MSTRG.10061	0.7	0.001	-9.45121	0.0220015	0.0364367	POLIA	DNA polymerase I A, chloroplastic/mitochondrial-like [Quercus suber]	Metabolism;Metabolism;Metabolism;Genetic Information Processing;Genetic Information Processing;Genetic Information Processing;Genetic Information Processing	Global and overview maps;Nucleotide metabolism;Nucleotide metabolism;Replication and repair;Replication and repair;Replication and repair;Replication and repair	ko01100//Metabolic pathways;ko00230//Purine metabolism;ko00240//Pyrimidine metabolism;ko03420//Nucleotide excision repair;ko03030//DNA replication;ko03440//Homologous recombination;ko03410//Base excision repair	K02335;K02335;K02335;K02335;K02335;K02335;K02335	-	-	-
CIL1400S0027	102.59	38.97	-1.39645	1.35447e-07	5.07105e-07	At2g34160	DNA/RNA-binding protein Alba-like protein [Corchorus capsularis]	-	-	-	-	-	-	-
CIL1552S0032	11.61	0.536667	-4.4352	3.36683e-30	7.85603e-29	--	DNA-3-methyladenine glycosylase 1 [Gossypium arboreum]	-	-	-	-	-	-	-
MSTRG.13574	62.9467	0.583333	-6.75367	9.36784e-57	7.92642e-55	guaA	DNA-3-methyladenine glycosylase 1 [Morella rubra]	Genetic Information Processing	Replication and repair	ko03410//Base excision repair	K01246	-	GO:0043733//DNA-3-methylbase glycosylase activity	GO:0006281//DNA repair;GO:0006305//DNA alkylation;GO:0006468//protein phosphorylation;GO:0009416//response to light stimulus;GO:0043269//regulation of ion transport
CIL1277S0040	20.5433	5.69333	-1.85132	7.5782e-05	0.000194636	--	DNA-binding protein HEXBP [Gossypium arboreum]	-	-	-	-	-	-	-
CIL0331S0004	0.523333	0.001	-9.03159	0.000989288	0.00212224	At2g25737	DNA-directed RNA polymerase isoform 2 [Theobroma cacao]	-	-	-	-	-	GO:0034062//RNA polymerase activity	GO:0009059//macromolecule biosynthetic process
CIL1259S0017	16.0433	5.47667	-1.5506	0.007118	0.0130252	cbpA	DnaJ domain-containing protein [Cephalotus follicularis]	-	-	-	-	-	-	-
CIL1401S0035	0.346667	0.001	-8.43741	0.00602631	0.0111886	dnaJ	DnaJ isogeny subfamily B member 12 [Cajanus cajan]	-	-	-	-	-	-	-
CIL1573S0002	1.80667	0.256667	-2.81536	0.019087	0.0320313	DNAJ1	DnaJ protein [Ananas comosus]	Genetic Information Processing	Folding, sorting and degradation	ko04141//Protein processing in endoplasmic reticulum	K09503	-	GO:0005515//protein binding	-
CIL1387S0016	5.84667	18.8767	1.69092	1.44684e-06	4.74804e-06	--	DnaJ/Hsp40 cysteine-rich domain superfamily protein [Theobroma cacao]	-	-	-	-	-	GO:0005515//protein binding	-
CIL1313S0051	0.25	0.001	-7.96578	0.00782649	0.0142148	--	DNAse I-like superfamily protein [Theobroma cacao]	-	-	-	-	-	GO:0004518//nuclease activity	GO:0090304//nucleic acid metabolic process
MSTRG.16183	2.28	0.493333	-2.2084	0.0177086	0.0299186	--	dr1-associated corepressor-like [Quercus suber]	-	-	-	-	-	GO:0005488//binding	-
CIL1259S0073	64.23	11.9933	-2.42101	5.50165e-06	1.66566e-05	Ptpmt1	DSPc domain-containing protein [Cephalotus follicularis]	-	-	-	-	-	GO:0004721//phosphoprotein phosphatase activity	GO:0006470//protein dephosphorylation;GO:0043405//regulation of MAP kinase activity
CIL1259S0070	50.5933	3.13667	-4.01164	1.71094e-07	6.33035e-07	--	DUF1005 domain-containing protein [Cephalotus follicularis]	-	-	-	-	GO:0005618//cell wall	-	-
CIL0293S0009	10.9133	0.363333	-4.90865	5.25361e-33	1.39917e-31	--	DUF1336 domain-containing protein [Cephalotus follicularis]	-	-	-	-	-	-	-
CIL1297S0037	2.44	0.306667	-2.99214	0.000128421	0.000318486	--	DUF150 domain-containing protein [Cephalotus follicularis]	-	-	-	-	-	-	-
CIL1567S0014	8.37667	18.0033	1.10382	5.39553e-15	4.43588e-14	--	DUF1639 domain-containing protein [Cephalotus follicularis]	-	-	-	-	-	-	-
CIL0176S0057	12.44	1.81	-2.78092	2.25426e-06	7.21515e-06	--	DUF1666 domain-containing protein [Cephalotus follicularis]	-	-	-	-	-	-	-
CIL0224S0012	3.97667	0.213333	-4.22038	6.34004e-13	4.26754e-12	--	DUF1666 domain-containing protein, partial [Cephalotus follicularis]	-	-	-	-	GO:0005622//intracellular	-	GO:0044237//cellular metabolic process
CIL0262S0010	5.24	0.6	-3.12653	1.58083e-07	5.87507e-07	--	DUF1677 domain-containing protein [Cephalotus follicularis]	-	-	-	-	-	-	-
CIL1584S0019	14.4767	34.56	1.25537	1.47618e-09	7.00936e-09	--	DUF1677 family protein [Medicago truncatula]	-	-	-	-	-	-	-
CIL1508S0024	6.85667	0.836667	-3.03478	1.20086e-07	4.53013e-07	--	DUF1677 family protein [Medicago truncatula]	-	-	-	-	-	-	-
CIL1577S0032	0.001	0.316667	8.30682	0.00163869	0.00338372	--	DUF1995 domain-containing protein [Cephalotus follicularis]	-	-	-	-	-	-	-
MSTRG.5281	0.07	0.746667	3.41504	0.0180706	0.0304703	At4g26485	DUF2431 domain-containing protein, partial [Cephalotus follicularis]	-	-	-	-	-	-	-
CIL1265S0076	3.13667	0.726667	-2.10987	9.96594e-05	0.000251213	--	DUF2921 domain-containing protein [Cephalotus follicularis]	-	-	-	-	GO:0031984//organelle subcompartment;GO:0043231//intracellular membrane-bounded organelle	-	-
MSTRG.18	14.6833	36.1433	1.29955	1.74015e-29	3.89489e-28	--	DUF3110 domain-containing protein [Cephalotus follicularis]	-	-	-	-	-	-	GO:0009642//response to light intensity
CIL1533S0018	2.42333	0.106667	-4.50581	6.99468e-06	2.08395e-05	--	DUF3119 domain-containing protein [Cephalotus follicularis]	-	-	-	-	-	-	-
CIL1393S0048	1.16	44.4967	5.2615	4.86885e-35	1.45261e-33	--	DUF3511 domain-containing protein [Cephalotus follicularis]	-	-	-	-	-	-	-
CIL0381S0005	2.32667	0.32	-2.86212	7.16859e-08	2.79161e-07	--	DUF3527 domain-containing protein [Cephalotus follicularis]	-	-	-	-	-	-	-
CIL1273S0050	14.31	41.0767	1.5213	2.17129e-07	7.94591e-07	--	DUF3675 domain-containing protein/RINGv domain-containing protein [Cephalotus follicularis]	-	-	-	-	-	-	-
CIL1293S0082	32.87	8.89667	-1.88543	1.50081e-10	7.92217e-10	--	DUF3741 domain-containing protein/DUF4378 domain-containing protein [Cephalotus follicularis]	-	-	-	-	-	-	-
CIL0338S0003	14.0033	0.336667	-5.37831	5.39849e-45	2.67921e-43	--	DUF3741 domain-containing protein/DUF4378 domain-containing protein/VARLMGL domain-containing protein [Cephalotus follicularis]	-	-	-	-	-	-	-
CIL1589S0001	3.22	0.143333	-4.48961	2.95475e-13	2.05701e-12	--	DUF3741 domain-containing protein/DUF4378 domain-containing protein/VARLMGL domain-containing protein [Cephalotus follicularis]	-	-	-	-	-	-	-
CIL0405S0005	1.93667	0.06	-5.01247	0.000194097	0.000468399	--	DUF3741 domain-containing protein/DUF4378 domain-containing protein/VARLMGL domain-containing protein [Cephalotus follicularis]	-	-	-	-	-	-	-
CIL0006S0015	3.33333	1.34667	-1.30757	0.0303306	0.0487811	--	DUF3754 domain-containing protein [Cephalotus follicularis]	-	-	-	-	-	-	-
CIL1446S0069	4.21667	58.6533	3.79804	6.98846e-75	1.14146e-72	--	DUF4228 domain-containing protein [Cephalotus follicularis]	-	-	-	-	-	-	GO:0009755//hormone-mediated signaling pathway
CIL0057S0009	18.22	0.001	-14.1532	1.41804e-14	1.11266e-13	--	DUF4228 domain-containing protein [Cephalotus follicularis]	-	-	-	-	-	-	-
CIL1545S0011	0.163333	4.98667	4.93218	5.81207e-09	2.57763e-08	--	DUF4228 domain-containing protein [Cephalotus follicularis]	-	-	-	-	-	-	-
CIL0218S0013	1.45	0.0266667	-5.76487	0.000182285	0.000441835	--	DUF4228 domain-containing protein [Cephalotus follicularis]	-	-	-	-	-	-	-
CIL1320S0019	0.243333	1.26667	2.38003	0.000585708	0.00130699	--	DUF4228 domain-containing protein [Cephalotus follicularis]	-	-	-	-	-	-	-
CIL1374S0003	0.646667	0.001	-9.33688	0.0118271	0.0207422	--	DUF4228 domain-containing protein [Cephalotus follicularis]	-	-	-	-	-	-	-
CIL1359S0044	0.836667	1.75333	1.06738	0.0127377	0.022214	--	DUF4228 domain-containing protein [Cephalotus follicularis]	-	-	-	-	-	-	-
CIL1436S0021	1.73667	0.001	-10.7621	0.00140473	0.00293799	--	DUF4228 domain-containing protein, partial [Cephalotus follicularis]	-	-	-	-	-	-	-
CIL1315S0029	12.9133	0.163333	-6.3049	1.27253e-36	4.17284e-35	--	DUF4378 domain-containing protein [Cephalotus follicularis]	-	-	-	-	-	-	-
CIL1367S0019	11.0833	0.06	-7.52921	2.22895e-28	4.7034e-27	--	DUF4378 domain-containing protein/VARLMGL domain-containing protein [Cephalotus follicularis]	-	-	-	-	-	-	-
CIL1568S0012	11.6333	0.07	-7.37669	1.97139e-20	2.45776e-19	--	DUF4378 domain-containing protein/VARLMGL domain-containing protein [Cephalotus follicularis]	-	-	-	-	-	-	-
CIL1323S0017	15.69	3.11	-2.33486	1.21541e-08	5.19308e-08	HI_0077	DUF455 domain-containing protein [Cephalotus follicularis]	-	-	-	-	-	GO:0046872//metal ion binding	GO:0044710//single-organism metabolic process
CIL1405S0074	71.8333	9.8	-2.8738	1.53232e-05	4.35371e-05	--	DUF538 domain-containing protein [Cephalotus follicularis]	-	-	-	-	-	-	-
CIL1600S0003	1.60333	0.0266667	-5.90989	1.38363e-06	4.55218e-06	--	DUF547 domain-containing protein/Lzipper-MIP1 domain-containing protein [Cephalotus follicularis]	-	-	-	-	-	-	-
CIL1387S0007	1.77333	16.43	3.2118	1.41566e-09	6.73222e-09	EOGT	DUF563 domain-containing protein [Cephalotus follicularis]	-	-	-	-	-	GO:0016740//transferase activity	-
CIL1325S0050	0.0266667	3.63333	7.09011	7.72036e-07	2.62987e-06	--	DUF569 domain-containing protein [Cephalotus follicularis]	-	-	-	-	-	-	-
CIL1615S0019	71.48	13.8333	-2.36939	1.16342e-11	6.90693e-11	--	DUF581 domain-containing protein [Cephalotus follicularis]	-	-	-	-	-	-	-
CIL1604S0029	0.11	1.01333	3.20353	0.0021475	0.00434943	--	DUF604 domain-containing protein [Cephalotus follicularis]	-	-	-	-	-	GO:0003824//catalytic activity	-
CIL1604S0028	0.326667	0.956667	1.5502	0.00323358	0.00633533	--	DUF604 domain-containing protein [Cephalotus follicularis]	-	-	-	-	-	GO:0003824//catalytic activity	-
CIL1305S0017	5.01333	0.001	-12.2916	1.7682e-11	1.031e-10	--	DUF620 domain-containing protein [Cephalotus follicularis]	-	-	-	-	-	-	-
CIL1359S0007	15.2933	0.82	-4.22114	1.25913e-44	6.15424e-43	NRG2	DUF632 domain-containing protein/DUF630 domain-containing protein [Cephalotus follicularis]	-	-	-	-	-	-	-
CIL1381S0008	53.39	172.187	1.68933	1.75485e-19	2.05945e-18	NRG2	DUF632 domain-containing protein/DUF630 domain-containing protein [Cephalotus follicularis]	-	-	-	-	-	-	-
CIL0325S0011	3.2	0.223333	-3.8408	8.16284e-10	3.99126e-09	NRG2	DUF632 domain-containing protein/DUF630 domain-containing protein [Cephalotus follicularis]	-	-	-	-	-	-	-
CIL1424S0033	4.02	0.33	-3.60666	1.84119e-09	8.64533e-09	NRG2	DUF632 domain-containing protein/DUF630 domain-containing protein [Cephalotus follicularis]	-	-	-	-	-	-	-
CIL1551S0019	17.66	6.09667	-1.53439	6.69922e-07	2.30384e-06	--	DUF639 domain-containing protein [Cephalotus follicularis]	-	-	-	-	-	-	-
CIL1429S0042	12.12	0.1	-6.92125	2.22666e-22	3.20487e-21	--	DUF641 domain-containing protein [Cephalotus follicularis]	-	-	-	-	-	-	-
CIL1332S0030	2.51	0.02	-6.97154	7.08685e-07	2.42818e-06	--	DUF642 [Vitis quinquangularis]	-	-	-	-	-	-	-
CIL1502S0034	8.53333	0.65	-3.7146	3.58663e-05	9.67494e-05	--	DUF642 [Vitis quinquangularis]	-	-	-	-	-	-	-
CIL0310S0015	2.02	29.52	3.86927	3.95921e-20	4.84703e-19	--	DUF668 domain-containing protein/DUF3475 domain-containing protein, partial [Cephalotus follicularis]	-	-	-	-	-	-	-
MSTRG.7310	10.2267	0.91	-3.49033	3.95215e-14	2.97183e-13	--	DUF674 domain-containing protein [Cephalotus follicularis]	-	-	-	-	-	-	-
CIL1436S0063	10.3067	0.57	-4.17647	4.25669e-17	4.13446e-16	--	DUF674 domain-containing protein, partial [Cephalotus follicularis]	-	-	-	-	-	-	-
CIL1515S0002	1.76667	0.001	-10.7868	2.51692e-06	7.99731e-06	--	DUF674 family protein [Medicago truncatula]	-	-	-	-	-	-	-
CIL0136S0001	1.44	14.1167	3.29326	3.56762e-16	3.22599e-15	--	DUF676 domain-containing protein [Cephalotus follicularis]	-	-	-	-	-	GO:0003824//catalytic activity	-
CIL1371S0029	0.183333	3.12667	4.09208	9.00674e-08	3.4594e-07	DMP5	DUF679 domain-containing protein [Cephalotus follicularis]	-	-	-	-	-	-	-
CIL1440S0014	7.54667	0.166667	-5.5008	1.73279e-24	2.90566e-23	--	DUF688 domain-containing protein [Cephalotus follicularis]	-	-	-	-	-	-	-
CIL1327S0045	1.53667	0.403333	-1.92976	0.00191764	0.00391431	--	DUF688 domain-containing protein [Cephalotus follicularis]	-	-	-	-	-	-	-
CIL0211S0004	5.63333	16.81	1.57726	2.82596e-09	1.30023e-08	--	DUF740 domain-containing protein [Cephalotus follicularis]	-	-	-	-	-	-	-
CIL1333S0023	2.23667	0.08	-4.80521	0.000502909	0.00113459	--	DUF761 domain-containing protein [Cephalotus follicularis]	-	-	-	-	-	-	-
CIL1268S0046	4.83667	0.18	-4.74794	1.09322e-09	5.2675e-09	--	DUF761 domain-containing protein, partial [Cephalotus follicularis]	-	-	-	-	-	-	-
CIL1325S0065	2.70667	0.001	-11.4023	2.67111e-08	1.0954e-07	--	DUF761 domain-containing protein, partial [Cephalotus follicularis]	-	-	-	-	-	-	-
CIL0344S0006	1.95667	0.0266667	-6.19722	3.14244e-05	8.53922e-05	--	DUF761 domain-containing protein, partial [Cephalotus follicularis]	-	-	-	-	-	-	-
CIL1383S0014	1.48	0.0633333	-4.54649	0.00155883	0.00323304	--	DUF761 domain-containing protein, partial [Cephalotus follicularis]	-	-	-	-	-	-	-
CIL0026S0005	0.896667	0.001	-9.80843	0.0068712	0.012621	--	DUF761 domain-containing protein/DUF4408 domain-containing protein [Cephalotus follicularis]	-	-	-	-	-	-	-
CIL1541S0024	76.1833	405.593	2.41249	1.2497e-12	8.14626e-12	--	DUF789 domain-containing protein [Cephalotus follicularis]	-	-	-	-	-	-	-
CIL0311S0012	15.41	6.49667	-1.2461	0.0031039	0.00610303	--	DUF863 domain-containing protein [Cephalotus follicularis]	-	-	-	-	-	-	-
CIL0495S0002	14.2967	64.4167	2.17176	3.65473e-14	2.75782e-13	MBR1	E3 ubiquitin ligase BIG BROTHER-related protein [Morus notabilis]	-	-	-	-	-	GO:0046872//metal ion binding	-
CIL1380S0005	23.4833	5.52333	-2.08803	3.09427e-19	3.5665e-18	IDM1	E3 ubiquitin-protein ligase TRIM33 [Morus notabilis]	-	-	-	-	-	GO:0003824//catalytic activity	-
MSTRG.14646	1.08333	2.28333	1.07566	0.0114341	0.0201187	--	E3 ubiquitin-protein like [Actinidia chinensis var. chinensis] [Actinidia chinensis]	-	-	-	-	-	-	-
MSTRG.11880	2.24	0.156667	-3.83773	1.82332e-05	5.12776e-05	--	EEIG1/EHBP1 N-terminal domain containing protein [Trema orientale]	-	-	-	-	-	-	-
MSTRG.3551	2.78	0.001	-11.4409	0.000228216	0.000544323	--	elongation factor [Trema orientale]	-	-	-	-	-	-	-
MSTRG.28875	68.64	143.42	1.06312	9.75733e-06	2.8485e-05	--	elongation factor 1-delta 1-like [Hibiscus syriacus]	-	-	-	-	GO:0016020//membrane;GO:0043231//intracellular membrane-bounded organelle	-	GO:0032958//inositol phosphate biosynthetic process;GO:0046474//glycerophospholipid biosynthetic process
CIL0207S0006	51.0533	0.586667	-6.44332	2.21633e-34	6.36936e-33	--	Elongation factor 4 [Gossypium arboreum]	-	-	-	-	-	-	-
CIL1324S0051	7.8	0.47	-4.05274	1.04317e-14	8.30388e-14	efp	Elongation factor P family protein [Theobroma cacao]	-	-	-	-	GO:0009532//plastid stroma	-	GO:0003006//developmental process involved in reproduction;GO:0006518//peptide metabolic process;GO:0006605//protein targeting;GO:0034645//cellular macromolecule biosynthetic process
CIL1371S0044	14.6367	38.9167	1.4108	2.84741e-30	6.67422e-29	--	Endonuclease or glycosyl hydrolase [Theobroma cacao]	-	-	-	-	GO:0042579//microbody	GO:0003824//catalytic activity	GO:0006950//response to stress;GO:0010467//gene expression;GO:0090304//nucleic acid metabolic process
CIL1584S0002	9.96667	36.86	1.88687	3.73505e-29	8.19646e-28	At4g32285	ENTH/ANTH/VHS superfamily protein [Corchorus capsularis]	-	-	-	-	GO:0030117//membrane coat;GO:0030135//coated vesicle	GO:0005515//protein binding;GO:0035091//phosphatidylinositol binding	GO:0006901//vesicle coating
CIL1294S0070	0.49	2.62667	2.42238	8.23669e-05	0.000210356	EXPA22	Expansin [Corchorus olitorius]	-	-	-	-	GO:0030312//external encapsulating structure	-	GO:0071555//cell wall organization
MSTRG.11912	1.06667	0.001	-10.0589	0.0024409	0.00489261	--	extensin-like repeat protein [Medicago truncatula]	-	-	-	-	-	-	-
CIL1502S0045	6.09	0.443333	-3.77998	5.56436e-09	2.47415e-08	hpxO	FAD_binding_3 domain-containing protein [Cephalotus follicularis]	-	-	-	-	-	GO:0003824//catalytic activity	GO:0044710//single-organism metabolic process
CIL1416S0064	21.1	5.85333	-1.84991	4.15023e-10	2.09353e-09	--	F-box family protein [Theobroma cacao]	-	-	-	-	-	-	-
MSTRG.24759	1.52	0.0833333	-4.18903	0.00610976	0.0113337	FLZ17	FCS-Like Zinc finger 17-like [Quercus lobata]	-	-	-	-	-	-	-
CIL1447S0014	38.2967	0.766667	-5.64248	4.39186e-15	3.63388e-14	--	fiber protein Fb34 [Medicago truncatula]	-	-	-	-	-	-	-
MSTRG.24741	0.616667	4.16333	2.75518	3.07615e-12	1.92474e-11	--	Flagellin [Actinidia chinensis var. chinensis] [Actinidia chinensis]	-	-	-	-	-	GO:0005488//binding	-
MSTRG.27459	2.18333	10.9	2.31972	9.39314e-10	4.55827e-09	--	Flagellin [Actinidia chinensis var. chinensis] [Actinidia chinensis]	-	-	-	-	-	GO:0005488//binding	-
CIL0027S0007	20.0133	7.96	-1.33012	0.0190151	0.0319231	--	forkhead-associated domain-containing family protein [Populus trichocarpa]	-	-	-	-	-	-	-
CIL1303S0044	3.74333	15.6733	2.06592	9.1934e-14	6.69965e-13	--	Formate--tetrahydrofolate ligase [Gossypium arboreum]	-	-	-	-	-	-	-
CIL1266S0010	3.13	0.001	-11.6119	2.24142e-11	1.29406e-10	--	fringe-related family protein [Populus trichocarpa]	-	-	-	-	-	-	-
CIL1305S0027	1.35667	0.001	-10.4059	7.57966e-08	2.94104e-07	--	fringe-related family protein [Populus trichocarpa]	-	-	-	-	-	GO:0016740//transferase activity	-
CIL1497S0007	1.96667	0.04	-5.61961	9.88244e-08	3.7744e-07	--	fringe-related family protein [Populus trichocarpa]	-	-	-	-	-	-	-
CIL1295S0011	1.46	0.0433333	-5.07435	2.12581e-08	8.81439e-08	--	Fringe-related protein isoform 2 [Theobroma cacao]	-	-	-	-	-	GO:0016740//transferase activity	-
MSTRG.3845	0.0733333	3.06667	5.38606	2.16912e-05	6.03411e-05	--	gag protein [Populus trichocarpa]	-	-	-	-	-	-	-
CIL1424S0028	77.0533	30.4833	-1.33784	5.70785e-05	0.000149576	--	Galactose mutarotase-like superfamily protein isoform 1 [Theobroma cacao]	Metabolism;Metabolism;Metabolism	Global and overview maps;Global and overview maps;Carbohydrate metabolism	ko01100//Metabolic pathways;ko01110//Biosynthesis of secondary metabolites;ko00010//Glycolysis / Gluconeogenesis	K01792;K01792;K01792	-	GO:0003824//catalytic activity;GO:0005488//binding	GO:0044238//primary metabolic process
MSTRG.9401	5.36333	0.001	-12.3889	2.43985e-11	1.40422e-10	GABA-TP3	gamma aminobutyrate transaminase 3, chloroplastic [Pistacia vera]	Metabolism;Metabolism;Metabolism	Global and overview maps;Amino acid metabolism;Carbohydrate metabolism	ko01100//Metabolic pathways;ko00250//Alanine, aspartate and glutamate metabolism;ko00650//Butanoate metabolism	K16871;K16871;K16871	GO:0009536//plastid;GO:0031090//organelle membrane	GO:0003867//4-aminobutyrate transaminase activity;GO:0043168//anion binding;GO:0046914//transition metal ion binding	GO:0000904//cell morphogenesis involved in differentiation;GO:0005984//disaccharide metabolic process;GO:0006105//succinate metabolic process;GO:0006511//ubiquitin-dependent protein catabolic process;GO:0006970//response to osmotic stress;GO:0006996//organelle organization;GO:0009062//fatty acid catabolic process;GO:0009063//cellular amino acid catabolic process;GO:0009064//glutamine family amino…
MSTRG.8402	1.04	8.79333	3.07983	8.13693e-11	4.41991e-10	--	Gamma-tubulin complex component 5 isoform C [Glycine soja]	-	-	-	-	GO:0005819//spindle	GO:0016301//kinase activity;GO:0032550//purine ribonucleoside binding	GO:0006464//cellular protein modification process;GO:0006796//phosphate-containing compound metabolic process;GO:0007017//microtubule-based process
CIL1271S0023	103.057	1.85667	-5.79458	2.24891e-30	5.28096e-29	--	Gastrula zinc finger xFG20-1 [Gossypium arboreum]	-	-	-	-	GO:0031224//intrinsic component of membrane	GO:0016763//transferase activity, transferring pentosyl groups;GO:0043169//cation binding	GO:0010468//regulation of gene expression;GO:0016129//phytosteroid biosynthetic process
CIL1293S0086	2.78667	0.001	-11.4443	1.75736e-10	9.20855e-10	At2g04570	GDSL esterase/lipase At2g04570 family [Cajanus cajan]	-	-	-	-	-	GO:0016787//hydrolase activity	-
MSTRG.25901	2.06667	22.78	3.46239	9.16867e-08	3.5174e-07	Os02g0491600	germin-like protein 2-1 [Pyrus ussuriensis x Pyrus communis]	-	-	-	-	-	GO:0003824//catalytic activity;GO:0046914//transition metal ion binding	GO:0006801//superoxide metabolic process;GO:0044710//single-organism metabolic process
CIL1358S0045	6.29667	1.76	-1.83901	0.00118876	0.00251874	--	Germin-like protein subfamily 1 member 15 [Anthurium amnicola]	-	-	-	-	-	-	-
CIL0291S0004	0.143333	6.44333	5.49036	1.00338e-08	4.33014e-08	SN2	Gibberellin regulated protein [Corchorus olitorius]	-	-	-	-	-	-	-
CIL0291S0005	252.853	1306.36	2.36918	1.14766e-05	3.31778e-05	GASA1	Gibberellin regulated protein [Corchorus olitorius]	-	-	-	-	-	-	-
CIL0218S0011	9.32	0.02	-8.86419	2.38952e-11	1.37679e-10	CG12206	Glutaredoxin [Corchorus capsularis]	-	-	-	-	-	-	GO:0044699//single-organism process
CIL1325S0027	6.77333	1.74333	-1.95802	0.000113513	0.000283201	At3g28850	Glutaredoxin domain-containing protein [Cephalotus follicularis]	-	-	-	-	-	-	GO:0044699//single-organism process
CIL0004S0013	2.60333	0.0466667	-5.80182	8.83791e-09	3.8365e-08	At3g28850	glutaredoxin family protein [Populus trichocarpa]	-	-	-	-	-	-	-
CIL1405S0001	4.42333	0.0333333	-7.05202	8.38781e-07	2.84335e-06	--	Glutathione transport system permease gsiD [Gossypium arboreum]	-	-	-	-	-	-	-
MSTRG.8041	0.423333	11.04	4.7048	1.61608e-20	2.03246e-19	--	glycine-rich cell wall structural protein 1-like [Quercus lobata]	-	-	-	-	-	-	-
CIL1404S0002	0.001	0.793333	9.63178	0.00198693	0.00404517	--	glycine-rich family protein [Populus trichocarpa]	-	-	-	-	-	-	-
CIL1413S0002	32.97	128.897	1.96699	4.68733e-39	1.74806e-37	--	Glyco_transf_21 domain-containing protein [Cephalotus follicularis]	-	-	-	-	-	GO:0016740//transferase activity	-
CIL1276S0024	3.59	0.17	-4.40038	2.81324e-12	1.76861e-11	--	Glyco_transf_21 domain-containing protein [Cephalotus follicularis]	-	-	-	-	-	GO:0016740//transferase activity	-
CIL1452S0013	6.26333	1.06333	-2.55834	1.10616e-08	4.75065e-08	Gyg1	Glyco_transf_8 domain-containing protein [Cephalotus follicularis]	-	-	-	-	-	-	-
CIL1264S0024	1.63	46.4833	4.83377	2.17101e-51	1.45904e-49	--	glycosyl transferase family 1 family protein [Populus trichocarpa]	-	-	-	-	-	-	-
CIL1378S0030	0.126667	2.04333	4.01182	9.31263e-10	4.52175e-09	--	glycosyl transferase family 1 family protein [Populus trichocarpa]	-	-	-	-	-	GO:0003824//catalytic activity	GO:0009247//glycolipid biosynthetic process
CIL1332S0003	0.353333	0.001	-8.46489	0.00411726	0.00789995	--	Glycosyl transferase, family 14 [Corchorus olitorius]	-	-	-	-	-	GO:0008194//UDP-glycosyltransferase activity	-
CIL1383S0036	24.0767	3.04667	-2.98233	4.79077e-27	9.43062e-26	GLX1	Glyoxalase domain-containing protein [Cephalotus follicularis]	Metabolism	Carbohydrate metabolism	ko00620//Pyruvate metabolism	K01759	-	-	-
CIL1603S0013	8.59333	1.97333	-2.12258	1.01946e-07	3.88499e-07	--	Golgi apparatus membrane protein TVP15 [Corchorus olitorius]	-	-	-	-	-	-	-
CIL1439S0024	19.6133	0.226667	-6.43512	2.14652e-56	1.7812e-54	NRG2	Golgin subfamily A member 4 [Theobroma cacao]	-	-	-	-	-	-	GO:0003006//developmental process involved in reproduction;GO:0006342//chromatin silencing;GO:0009791//post-embryonic development;GO:0016570//histone modification
MSTRG.27692	5.37667	1.62333	-1.72775	0.00955147	0.0170573	--	GRF zinc finger protein [Medicago truncatula]	-	-	-	-	-	-	-
MSTRG.1865	1.51333	0.001	-10.5635	1.78007e-05	5.01564e-05	--	group 2 truncated hemoglobin YjbI-like [Hibiscus syriacus]	-	-	-	-	-	-	-
MSTRG.28321	0.673333	2.54667	1.91922	0.0100877	0.0179453	GILP	GSH-induced LITAF domain protein [Ziziphus jujuba]	-	-	-	-	-	-	GO:0006605//protein targeting;GO:0009642//response to light intensity;GO:0009755//hormone-mediated signaling pathway;GO:0010363//regulation of plant-type hypersensitive response
MSTRG.2729	0.01	1.35	7.07682	5.96434e-09	2.63971e-08	LECRK3	G-type lectin S-receptor-like serine/threonine-protein kinase LECRK3 [Vitis vinifera]	-	-	-	-	-	GO:0004672//protein kinase activity;GO:0097159//organic cyclic compound binding;GO:1901363//heterocyclic compound binding	GO:0006796//phosphate-containing compound metabolic process
CIL1599S0003	5.72	0.946667	-2.59509	1.33391e-06	4.4015e-06	RSH2	Guanosine-3',5'-bis(diphosphate) 3'-pyrophosphohydrolase [Morus notabilis]	-	-	-	-	-	GO:0003824//catalytic activity	-
CIL1425S0014	10.0867	21.5667	1.09635	0.000221321	0.000529149	--	Harbinger transposase-derived nuclease [Corchorus capsularis]	-	-	-	-	GO:0009536//plastid;GO:0016020//membrane	-	GO:0006812//cation transport
CIL1271S0018	1.44333	0.25	-2.5294	0.000262739	0.000620982	PHOX1	heat shock protein 70 [Cucumis melo subsp. melo] [Cucumis melo]	-	-	-	-	-	-	-
CIL1497S0020	39.2	5.74667	-2.77006	3.23746e-14	2.4566e-13	--	Histone deacetylase complex subunit SAP30/SAP30-like protein [Corchorus capsularis]	-	-	-	-	-	-	-
CIL1316S0030	112.227	10.0967	-3.47446	5.81266e-07	2.01596e-06	--	Histone deacetylase complex subunit SAP30/SAP30-like protein [Corchorus capsularis]	-	-	-	-	-	-	-
CIL1306S0023	94.6833	11.7833	-3.00636	4.48941e-05	0.00011938	--	Histone deacetylase complex subunit SAP30/SAP30-like protein [Corchorus capsularis]	-	-	-	-	-	-	-
CIL0183S0002	59.0933	0.186667	-8.30639	2.84049e-25	4.97993e-24	H3-1.1	Histone H3.2, partial [Cajanus cajan]	-	-	-	-	GO:0043231//intracellular membrane-bounded organelle;GO:0043232//intracellular non-membrane-bounded organelle	GO:0003676//nucleic acid binding;GO:0046983//protein dimerization activity	-
CIL0137S0001	79.6667	0.526667	-7.24094	2.30677e-35	7.02014e-34	SlH4	histone H4 [Zea mays]	-	-	-	-	GO:0005911//cell-cell junction;GO:0009536//plastid;GO:0031090//organelle membrane;GO:0043232//intracellular non-membrane-bounded organelle	GO:0003676//nucleic acid binding;GO:0046983//protein dimerization activity	GO:0034728//nucleosome organization
CIL0001S0059	130.673	43.8167	-1.57641	1.19852e-06	3.97816e-06	SlH4	histone H4 [Zea mays]	-	-	-	-	GO:0005911//cell-cell junction;GO:0009536//plastid;GO:0031090//organelle membrane;GO:0043232//intracellular non-membrane-bounded organelle	GO:0003676//nucleic acid binding;GO:0046983//protein dimerization activity	GO:0034728//nucleosome organization
CIL1546S0036	16.6367	0.693333	-4.58467	1.5813e-14	1.23364e-13	SlH4	Histone H4, partial [Noccaea caerulescens]	-	-	-	-	-	-	-
CIL0182S0015	0.0633333	2.26	5.15721	0.000156695	0.000383665	--	HMA domain-containing protein [Cephalotus follicularis]	Environmental Information Processing	Signal transduction	ko04075//Plant hormone signal transduction	K14503	-	-	-
CIL0681S0002	1.05667	0.001	-10.0453	2.09978e-05	5.8532e-05	--	Homer protein isoform 2 [Theobroma cacao]	-	-	-	-	-	-	-
CIL1384S0005	9.51333	1.72667	-2.46196	6.20494e-06	1.86264e-05	thrA	homoserine dehydrogenase family protein [Populus trichocarpa]	-	-	-	-	-	GO:0016772//transferase activity, transferring phosphorus-containing groups	GO:0000097//sulfur amino acid biosynthetic process;GO:0006549//isoleucine metabolic process;GO:0006566//threonine metabolic process;GO:0006796//phosphate-containing compound metabolic process
CIL1409S0026	4.13667	0.4	-3.3704	0.000161655	0.000394757	--	HTH-type transcriptional regulator protein ptxE [Theobroma cacao]	-	-	-	-	-	-	-
CIL1305S0059	15.6167	4.02333	-1.95662	8.13719e-08	3.14743e-07	Hdhd5	Hydrolase family protein / HAD-superfamily protein [Theobroma cacao]	-	-	-	-	-	GO:0003824//catalytic activity;GO:0046914//transition metal ion binding	-
CIL1305S0060	8.43667	2.16	-1.96564	0.00280259	0.00555417	SPAC22A12.08c	Hydrolase_like domain-containing protein/Hydrolase_6 domain-containing protein [Cephalotus follicularis]	-	-	-	-	-	-	-
MSTRG.3184	15.1133	2.92	-2.37178	0.000209409	0.00050239	RCI2A	hydrophobic protein LTI6B [Phalaenopsis equestris]	-	-	-	-	GO:0031224//intrinsic component of membrane	-	GO:0001101//response to acid chemical;GO:0006090//pyruvate metabolic process;GO:0006972//hyperosmotic response;GO:0006996//organelle organization;GO:0010038//response to metal ion;GO:0042044//fluid transport
MSTRG.2002	254.557	59.9133	-2.08704	6.08027e-07	2.10509e-06	LTI6B	hydrophobic protein RCI2B [Citrus clementina]	-	-	-	-	GO:0031224//intrinsic component of membrane	-	GO:0001101//response to acid chemical;GO:0006090//pyruvate metabolic process;GO:0006972//hyperosmotic response;GO:0006996//organelle organization;GO:0010038//response to metal ion;GO:0042044//fluid transport
CIL1459S0017	1.86	0.0733333	-4.66469	0.000555979	0.00124615	--	hypothetical protein 30 [Hevea brasiliensis]	-	-	-	-	-	-	-
CIL1406S0013	0.946667	0.001	-9.88671	0.0098617	0.01757	--	hypothetical protein B456_007G006700 [Gossypium raimondii]	-	-	-	-	-	-	-
CIL0272S0001	1.57	0.0366667	-5.42015	0.000793558	0.00173099	--	hypothetical protein CCACVL1_13441 [Corchorus capsularis]	-	-	-	-	-	-	-
CIL1431S0006	6.34333	0.06	-6.72413	5.96089e-08	2.34501e-07	--	hypothetical protein CICLE_v10017232mg [Citrus clementina]	-	-	-	-	-	-	-
MSTRG.29186	11.76	23.7067	1.0114	4.60482e-15	3.80399e-14	--	hypothetical protein CISIN_1g030964mg [Citrus sinensis]	-	-	-	-	-	-	-
MSTRG.5879	0.586667	1.24333	1.0836	0.0010727	0.00228924	--	hypothetical protein CJ030_MR5G003428 [Morella rubra]	-	-	-	-	-	-	-
MSTRG.13298	4.42	0.0466667	-6.56551	5.64128e-06	1.70534e-05	--	hypothetical protein CJ030_MR5G022114 [Morella rubra]	-	-	-	-	-	-	-
MSTRG.9857	74.5533	6.56	-3.50651	5.67768e-21	7.41517e-20	--	hypothetical protein CJ030_MR6G013207 [Morella rubra]	-	-	-	-	-	-	-
MSTRG.4055	33.8733	0.52	-6.02549	1.06613e-19	1.27084e-18	--	hypothetical protein CJ030_MR6G013207 [Morella rubra]	-	-	-	-	-	-	-
MSTRG.3702	4.56333	13.71	1.58707	2.89228e-15	2.44404e-14	--	hypothetical protein CMV_008446 [Castanea mollissima]	-	-	-	-	-	-	-
MSTRG.9508	7.06333	0.41	-4.10665	4.75063e-07	1.66575e-06	--	hypothetical protein ES288_1Z038800v1 [Gossypium darwinii]	-	-	-	-	-	-	-
MSTRG.11609	0.923333	0.001	-9.85071	0.00919247	0.0164652	--	hypothetical protein F0562_024010 [Nyssa sinensis]	-	-	-	-	-	-	-
MSTRG.5509	0.001	45.8433	15.4844	9.44567e-20	1.12959e-18	--	hypothetical protein FH972_004581 [Carpinus fangiana]	-	-	-	-	-	-	-
MSTRG.4054	1.42	5.08	1.83894	0.000783581	0.00171038	--	hypothetical protein FH972_007595 [Carpinus fangiana]	-	-	-	-	-	-	-
MSTRG.9859	36.5067	75.07	1.04008	2.81399e-10	1.44605e-09	--	hypothetical protein FH972_007962 [Carpinus fangiana]	-	-	-	-	-	-	-
MSTRG.28200	1.23	0.001	-10.2644	0.00151112	0.00314344	--	hypothetical protein FH972_007962 [Carpinus fangiana]	-	-	-	-	-	-	-
CIL1443S0022	0.613333	3.03667	2.30775	0.0033324	0.00651066	--	hypothetical protein JCGZ_02285 [Jatropha curcas]	-	-	-	-	-	-	-
CIL0212S0024	0.001	0.7	9.45121	0.00662217	0.0121905	--	hypothetical protein JCGZ_15146 [Jatropha curcas]	-	-	-	-	-	-	-
CIL0408S0004	14.0667	0.001	-13.78	2.58056e-11	1.48124e-10	--	hypothetical protein L484_009082 [Morus notabilis]	-	-	-	-	-	-	-
CIL1507S0021	1.80667	0.243333	-2.89232	0.0246253	0.0403496	--	hypothetical protein L484_024044 [Morus notabilis]	-	-	-	-	-	-	-
CIL1539S0024	4.71	0.14	-5.07223	0.00315378	0.00619404	--	hypothetical protein LR48_Vigan04g237900 [Vigna angularis]	-	-	-	-	-	-	-
CIL1541S0001	4.47667	0.666667	-2.74739	0.023341	0.0384404	--	hypothetical protein LR48_Vigan10g020600 [Vigna angularis]	-	-	-	-	-	-	-
CIL1369S0005	60.22	196.557	1.70663	3.78106e-05	0.000101665	--	hypothetical protein MANES_12G094900 [Manihot esculenta]	-	-	-	-	-	-	-
CIL1494S0038	41.2433	102.103	1.3078	1.0136e-05	2.95204e-05	--	hypothetical protein MANES_15G150600 [Manihot esculenta]	-	-	-	-	-	-	-
CIL1370S0032	9.63667	24.15	1.32542	0.000255743	0.000605613	--	hypothetical protein POPTR_0013s08120g [Populus trichocarpa]	-	-	-	-	-	-	-
CIL1514S0001	0.416667	0.0133333	-4.96578	0.0161889	0.0275585	--	hypothetical protein POPTR_0014s18830g [Populus trichocarpa]	-	-	-	-	-	-	-
CIL1594S0009	1.06667	0.0333333	-5	0.00308807	0.00607516	--	hypothetical protein POPTR_0505s00220g [Populus trichocarpa]	-	-	-	-	-	-	-
CIL1444S0009	10.4	0.926667	-3.48839	8.02358e-16	7.09611e-15	--	hypothetical protein PRUPE_4G189400 [Prunus persica]	-	-	-	-	-	-	-
CIL0041S0019	1.82333	0.001	-10.8324	0.000106612	0.000267198	--	hypothetical protein PRUPE_ppa013763mg [Prunus persica]	-	-	-	-	-	-	-
CIL1293S0038	4.42333	0.226667	-4.28649	1.63497e-07	6.06491e-07	--	hypothetical protein PRUPE_ppa013897mg [Prunus persica]	-	-	-	-	-	-	-
CIL1400S0016	0.393333	2.75	2.80561	0.00031249	0.000729945	--	hypothetical protein PRUPE_ppa023952mg [Prunus persica]	-	-	-	-	-	-	-
CIL1546S0032	6.64667	0.29	-4.51851	2.81801e-07	1.01514e-06	--	immunophilin family protein [Populus trichocarpa]	-	-	-	-	-	-	-
CIL1369S0026	2.40333	0.66	-1.8645	0.00519623	0.00977542	--	Inosine-uridine preferring nucleoside hydrolase family protein isoform 1 [Theobroma cacao]	-	-	-	-	-	GO:0003824//catalytic activity	-
CIL1405S0032	5.41333	1.07	-2.33891	1.70243e-07	6.30247e-07	--	Inositol-1,4,5-trisphosphate 5-phosphatase 4 isoform 1 [Theobroma cacao]	-	-	-	-	-	-	-
MSTRG.11520	6.38	0.673333	-3.24416	1.29359e-39	4.98263e-38	--	integrase [Populus trichocarpa]	-	-	-	-	-	-	-
MSTRG.5774	2.14667	0.001	-11.0679	0.00709037	0.0129829	--	integrase, partial [Populus trichocarpa]	-	-	-	-	-	-	-
MSTRG.1559	0.001	1.01333	9.98489	4.57378e-10	2.29596e-09	--	integrator complex subunit 11 [Dendrobium catenatum]	-	-	-	-	-	-	-
CIL1407S0004	19.2533	56.3267	1.54871	5.24004e-24	8.47303e-23	DDB_G0289029	Ist1 domain-containing protein [Cephalotus follicularis]	Cellular Processes	Transport and catabolism	ko04144//Endocytosis	K19476	-	-	-
CIL1468S0006	83.1167	27.03	-1.62058	0.000283603	0.000666328	--	Ist1 domain-containing protein [Cephalotus follicularis]	-	-	-	-	-	-	-
CIL1265S0040	25.4033	2.22	-3.51639	1.99918e-12	1.2739e-11	--	JHL06P13.17 [Jatropha curcas]	-	-	-	-	-	-	-
CIL1553S0012	23.5433	4.47	-2.39697	6.39793e-16	5.69153e-15	yjcL	Keratin-associated protein 5-4 [Theobroma cacao]	-	-	-	-	-	-	-
CIL1429S0024	6.43	59.5867	3.2121	1.72674e-52	1.23783e-50	ltnD	Ketose-bisphosphate aldolase class-II family protein isoform 3 [Theobroma cacao]	-	-	-	-	-	GO:0016616//oxidoreductase activity, acting on the CH-OH group of donors, NAD or NADP as acceptor;GO:0016830//carbon-carbon lyase activity;GO:0048037//cofactor binding	GO:0044237//cellular metabolic process;GO:0044238//primary metabolic process;GO:0044281//small molecule metabolic process;GO:0044763//single-organism cellular process;GO:1901564//organonitrogen compound metabolic process
CIL1519S0005	5.35667	1.68	-1.67287	0.000138242	0.00034117	--	Kinase superfamily protein isoform 2 [Theobroma cacao]	-	-	-	-	GO:0009536//plastid	GO:0016772//transferase activity, transferring phosphorus-containing groups;GO:0032550//purine ribonucleoside binding	GO:0006464//cellular protein modification process;GO:0006796//phosphate-containing compound metabolic process
CIL1495S0018	16.29	1.35	-3.59296	2.78006e-12	1.74945e-11	PCMP-H38	kinase-like protein TMKL1 precursor [Populus trichocarpa]	-	-	-	-	GO:0005911//cell-cell junction;GO:0031224//intrinsic component of membrane	GO:0016772//transferase activity, transferring phosphorus-containing groups;GO:0032550//purine ribonucleoside binding	GO:0006464//cellular protein modification process;GO:0006796//phosphate-containing compound metabolic process;GO:0009799//specification of symmetry;GO:0009933//meristem structural organization;GO:0009943//adaxial/abaxial axis specification;GO:0048509//regulation of meristem development
CIL1427S0029	2.62333	0.001	-11.3572	1.41668e-10	7.498e-10	IMK3	kinase-like protein TMKL1 precursor [Populus trichocarpa]	-	-	-	-	GO:0005911//cell-cell junction;GO:0031224//intrinsic component of membrane	GO:0016772//transferase activity, transferring phosphorus-containing groups;GO:0032550//purine ribonucleoside binding	GO:0006464//cellular protein modification process;GO:0006796//phosphate-containing compound metabolic process;GO:0009799//specification of symmetry;GO:0009933//meristem structural organization;GO:0009943//adaxial/abaxial axis specification;GO:0048509//regulation of meristem development
CIL0318S0013	0.63	2.21667	1.81497	6.17565e-05	0.000160774	--	late embryogenesis abundant protein [Medicago truncatula]	-	-	-	-	GO:0005911//cell-cell junction;GO:0031225//anchored component of membrane	-	-
CIL0260S0023	0.36	5.11333	3.8282	4.37134e-06	1.33996e-05	--	Late embryogenesis abundant protein, LEA-14 [Corchorus capsularis]	-	-	-	-	-	-	-
CIL0045S0011	2.02	0.323333	-2.64326	0.0200837	0.0335182	--	LEA_2 domain-containing protein [Cephalotus follicularis]	-	-	-	-	-	-	-
CIL0429S0006	4.08333	1.10667	-1.88353	0.000776364	0.00169607	ALIS3	LEM3 (ligand-effect modulator 3) family protein [Medicago truncatula]	-	-	-	-	-	-	-
MSTRG.24027	0.0266667	11.34	8.73217	5.40859e-10	2.69458e-09	--	leucine-rich repeat extensin-like protein 5 [Quercus suber]	-	-	-	-	-	-	-
CIL1305S0050	16.6067	151.41	3.18863	1.88201e-43	8.83075e-42	--	Leucine-rich repeat structural protein ORF147 [Theobroma cacao]	-	-	-	-	-	-	-
CIL1319S0012	8.59667	0.32	-4.74763	2.7343e-27	5.43637e-26	--	Leucine-rich repeat-containing protein 50 [Theobroma cacao]	-	-	-	-	-	-	-
CIL1438S0007	27.4567	8.29333	-1.72713	0.000414474	0.000949099	LIL3.1	lil3 family protein [Populus trichocarpa]	-	-	-	-	-	-	-
CIL1330S0001	6.53667	34.16	2.38568	5.31439e-10	2.6497e-09	--	Lipase, class 3 [Corchorus capsularis]	-	-	-	-	-	GO:0003824//catalytic activity	-
MSTRG.25975	20.8967	3.09667	-2.75448	1.81809e-05	5.11494e-05	--	loricrin-like [Coffea eugenioides]	-	-	-	-	-	-	-
CIL0152S0005	12.4833	1.50333	-3.05377	1.08242e-13	7.82468e-13	stp1	Low molecular weight protein-tyrosine-phosphatase slr0328 [Theobroma cacao]	-	-	-	-	-	-	GO:0006470//protein dephosphorylation
MSTRG.15024	2.50333	0.206667	-3.59847	0.000475344	0.00107579	--	LOW QUALITY PROTEIN: nascent polypeptide-associated complex subunit alpha, muscle-specific form [Morus notabilis]	-	-	-	-	-	-	-
CIL1303S0039	3.28	0.58	-2.49957	4.09583e-07	1.44637e-06	--	LOW QUALITY PROTEIN: PPR domain-containing protein/PPR_1 domain-containing protein/PPR_2 domain-containing protein, partial [Cephalotus follicularis]	-	-	-	-	-	-	-
MSTRG.14963	1.21667	0.05	-4.60486	0.00986742	0.0175789	RPP8L4	LOW QUALITY PROTEIN: probable disease resistance RPP8-like protein 2 [Quercus suber]	-	-	-	-	-	GO:0032550//purine ribonucleoside binding	GO:0008152//metabolic process
CIL1615S0025	18.2567	0.33	-5.78981	2.54697e-52	1.80576e-50	--	LOW QUALITY PROTEIN: zf-GRF domain-containing protein, partial [Cephalotus follicularis]	-	-	-	-	-	-	-
MSTRG.7170	2.75667	0.486667	-2.50192	0.000876254	0.00189742	LCY1	lycopene beta cyclase, chloroplastic/chromoplastic [Quercus suber]	Metabolism;Metabolism;Metabolism	Global and overview maps;Global and overview maps;Metabolism of terpenoids and polyketides	ko01100//Metabolic pathways;ko01110//Biosynthesis of secondary metabolites;ko00906//Carotenoid biosynthesis	K06443;K06443;K06443	GO:0009536//plastid;GO:0016020//membrane	GO:0016491//oxidoreductase activity;GO:0016860//intramolecular oxidoreductase activity	GO:0016109//tetraterpenoid biosynthetic process
MSTRG.4710	3.88	1.23	-1.6574	0.00622609	0.0115205	LCY1	lycopene beta cyclase, chloroplastic/chromoplastic [Quercus suber]	Metabolism;Metabolism;Metabolism	Global and overview maps;Global and overview maps;Metabolism of terpenoids and polyketides	ko01100//Metabolic pathways;ko01110//Biosynthesis of secondary metabolites;ko00906//Carotenoid biosynthesis	K06443;K06443;K06443	GO:0009536//plastid;GO:0016020//membrane	GO:0016491//oxidoreductase activity;GO:0016860//intramolecular oxidoreductase activity	GO:0016109//tetraterpenoid biosynthetic process
MSTRG.4470	0.333333	84.5133	7.98607	3.20791e-40	1.27364e-38	VUP4	Lysine-specific demethylase [Actinidia chinensis var. chinensis] [Actinidia chinensis]	-	-	-	-	-	-	-
CIL1568S0019	0.116667	1.96667	4.07529	0.000205433	0.000493585	--	LysM domain-containing protein [Cephalotus follicularis]	-	-	-	-	-	-	-
CIL1275S0001	27.5867	0.0366667	-9.55529	1.98366e-13	1.40484e-12	--	Malectin/receptor protein kinase family protein [Theobroma cacao]	-	-	-	-	-	-	-
CIL0570S0001	9.17667	0.001	-13.1638	1.64847e-09	7.78732e-09	--	Malectin/receptor protein kinase family protein [Theobroma cacao]	-	-	-	-	-	-	-
CIL0479S0002	16.1367	0.07	-7.84877	1.41015e-08	5.98449e-08	--	Malectin/receptor protein kinase family protein [Theobroma cacao]	-	-	-	-	-	-	-
CIL0318S0015	4.71667	0.001	-12.2036	1.14255e-07	4.32534e-07	--	Malectin/receptor protein kinase family protein [Theobroma cacao]	-	-	-	-	-	GO:0016772//transferase activity, transferring phosphorus-containing groups	-
CIL0634S0001	0.496667	0.001	-8.95613	0.0286899	0.0463876	--	Malectin/receptor protein kinase family protein [Theobroma cacao]	-	-	-	-	-	-	-
CIL1515S0019	29.7333	0.103333	-8.16863	9.9596e-23	1.47463e-21	--	Mediator of RNA polymerase II transcription subunit 8 [Theobroma cacao]	-	-	-	-	-	-	-
CIL1338S0017	20.25	0.0866667	-7.86823	4.02886e-11	2.26866e-10	--	membrane family protein [Populus trichocarpa]	-	-	-	-	-	-	GO:0044237//cellular metabolic process
CIL0121S0020	42.27	4.79	-3.14154	0.000131209	0.000324932	--	membrane family protein [Populus trichocarpa]	-	-	-	-	-	-	GO:0044237//cellular metabolic process
CIL1611S0028	2.40333	0.001	-11.2308	5.5354e-05	0.000145367	--	Membrane lipoprotein [Theobroma cacao]	-	-	-	-	-	-	-
MSTRG.4056	17.8467	1.43667	-3.63486	2.26029e-11	1.30466e-10	--	merozoite surface protein CMZ-8-like [Quercus suber]	-	-	-	-	-	-	-
CIL0486S0001	3.21	32.8333	3.35452	3.40283e-42	1.49348e-40	--	Metallo-beta-lactamase family protein isoform 1 [Theobroma cacao]	-	-	-	-	-	GO:0003824//catalytic activity	-
CIL1479S0013	16.7033	4.84	-1.78706	0.000202053	0.000486053	--	Metallo-hydrolase/oxidoreductase superfamily protein [Theobroma cacao]	-	-	-	-	-	GO:0003824//catalytic activity	-
CIL0030S0012	18.0367	7.52667	-1.26085	0.00112396	0.00238929	LACTB2	Metallo-hydrolase/oxidoreductase superfamily protein isoform 3 [Theobroma cacao]	-	-	-	-	GO:0043231//intracellular membrane-bounded organelle	GO:0003824//catalytic activity	-
CIL1263S0090	104.567	23.7533	-2.13822	0.00158664	0.0032857	MT2	metallothionein-like protein type 3 [Ananas comosus]	-	-	-	-	-	GO:0043169//cation binding	GO:0006605//protein targeting;GO:0006970//response to osmotic stress;GO:0007275//multicellular organism development;GO:0009653//anatomical structure morphogenesis;GO:0009746//response to hexose;GO:0009891//positive regulation of biosynthetic process;GO:0010038//response to metal ion;GO:0032535//regulation of cellular component size;GO:0042044//fluid transport;GO:0043067//regulation of programmed …
CIL1402S0020	102.84	1058.55	3.36361	4.2013e-86	9.03525e-84	--	metallothionein-like protein, partial [Quercus robur]	-	-	-	-	-	-	-
CIL0374S0001	7.46667	1.14	-2.71143	6.17371e-07	2.13572e-06	tag	Methyladenine glycosylase [Corchorus capsularis]	Genetic Information Processing	Replication and repair	ko03410//Base excision repair	K01246	-	GO:0043733//DNA-3-methylbase glycosylase activity	GO:0006281//DNA repair;GO:0006305//DNA alkylation;GO:0009064//glutamine family amino acid metabolic process
CIL1444S0024	3.50333	32.8967	3.23114	2.98176e-10	1.52891e-09	--	Methyltransf_11 domain-containing protein [Cephalotus follicularis]	-	-	-	-	-	GO:0016741//transferase activity, transferring one-carbon groups	GO:0008152//metabolic process
CIL1393S0029	10.6967	0.236667	-5.49816	1.68814e-23	2.63716e-22	--	Methyltransf_29 domain-containing protein [Cephalotus follicularis]	-	-	-	-	-	-	-
CIL1393S0031	13.1567	0.543333	-4.59781	1.52097e-19	1.79068e-18	--	Methyltransf_29 domain-containing protein [Cephalotus follicularis]	-	-	-	-	-	-	-
CIL0260S0018	1.28667	0.153333	-3.0689	0.00352758	0.0068541	--	Methyltransf_29 domain-containing protein, partial [Cephalotus follicularis]	-	-	-	-	-	GO:0003824//catalytic activity;GO:0046914//transition metal ion binding	GO:0008152//metabolic process
CIL1567S0016	1.36333	10.8667	2.9947	3.22729e-07	1.15403e-06	--	methyltransferase-like protein [Medicago truncatula]	-	-	-	-	-	-	-
CIL1557S0012	17.2967	1.24	-3.80208	2.61325e-21	3.49974e-20	--	Methyltransferases [Theobroma cacao]	-	-	-	-	-	GO:0016741//transferase activity, transferring one-carbon groups	GO:0008152//metabolic process;GO:0016192//vesicle-mediated transport
MSTRG.23416	0.763333	0.07	-3.44689	0.0163809	0.0278571	--	Mg2+ transporter protein, Zinc transport protein [Parasponia andersonii]	-	-	-	-	-	GO:0022890//inorganic cation transmembrane transporter activity	GO:0006812//cation transport;GO:0044763//single-organism cellular process
MSTRG.10727	0.97	0.09	-3.42999	1.23569e-06	4.09207e-06	--	microtubule-associated protein 1B-like isoform X1 [Abrus precatorius]	-	-	-	-	-	-	-
MSTRG.4692	3.55667	1.34	-1.40829	0.0176893	0.029895	--	Mitochondrial inner membrane translocase subunit Tim17/Tim22/Tim23/peroxisomal protein PMP24 [Corchorus olitorius]	-	-	-	-	-	-	-
CIL1429S0045	6.79	2.09333	-1.69761	1.29735e-05	3.72257e-05	engB	MMR_HSR1 domain-containing protein [Cephalotus follicularis]	-	-	-	-	-	-	GO:0044763//single-organism cellular process
CIL1396S0002	10.4567	1.19667	-3.12733	6.51597e-21	8.45864e-20	mnmE	MMR_HSR1 domain-containing protein/TrmE_N domain-containing protein/GTPase_Cys_C domain-containing protein [Cephalotus follicularis]	-	-	-	-	GO:0044464//cell part	GO:0017111//nucleoside-triphosphatase activity;GO:0032550//purine ribonucleoside binding	GO:0008033//tRNA processing;GO:0016192//vesicle-mediated transport;GO:0035556//intracellular signal transduction
MSTRG.19355	1.86333	0.17	-3.45428	4.06059e-06	1.25124e-05	--	mTERF domain-containing protein [Cephalotus follicularis]	-	-	-	-	GO:0043231//intracellular membrane-bounded organelle	-	-
MSTRG.8538	0.916667	0.103333	-3.14909	0.00526812	0.00989983	--	MuDR family transposase [Prunus dulcis]	-	-	-	-	-	GO:0046914//transition metal ion binding	-
CIL1505S0023	11.6167	1.29	-3.17075	2.88124e-15	2.43551e-14	ABCC9	Multidrug resistance protein ABC transporter family [Theobroma cacao]	-	-	-	-	GO:0031224//intrinsic component of membrane	GO:0015405//P-P-bond-hydrolysis-driven transmembrane transporter activity;GO:0017111//nucleoside-triphosphatase activity;GO:0032550//purine ribonucleoside binding	GO:0044763//single-organism cellular process;GO:0051234//establishment of localization
CIL0344S0009	20.6433	58.75	1.50891	1.22381e-06	4.05689e-06	MYBS3	Myb_DNA-binding domain-containing protein [Cephalotus follicularis]	-	-	-	-	-	GO:0003676//nucleic acid binding;GO:0046914//transition metal ion binding	-
CIL1429S0031	8.44667	3.59333	-1.23306	0.0191098	0.032063	--	Myb_DNA-binding domain-containing protein, partial [Cephalotus follicularis]	-	-	-	-	-	-	-
CIL1318S0009	7.07333	0.001	-12.7882	4.85567e-10	2.43085e-09	ndhK	NADH-plastoquinone oxidoreductase subunit K (chloroplast) (chloroplast) [Hypseocharis bilobata]	-	-	-	-	GO:0009507//chloroplast	GO:0016655//oxidoreductase activity, acting on NAD(P)H, quinone or similar compound as acceptor;GO:0046872//metal ion binding;GO:0051536//iron-sulfur cluster binding	GO:0008152//metabolic process
MSTRG.14971	4.06	0.0466667	-6.44294	2.65756e-22	3.81232e-21	RPPL1	NB-ARC domain-containing disease resistance protein [Prunus dulcis]	-	-	-	-	-	-	-
CIL1506S0004	15.1033	2.25667	-2.7426	7.84993e-10	3.84554e-09	NHL26	NDR1/HIN1-like protein 13 [Cajanus cajan]	-	-	-	-	-	-	-
CIL1598S0009	10.9867	4.57333	-1.26444	0.00658567	0.0121302	NOA1	nitric oxide synthase, partial [Betula platyphylla]	Metabolism;Metabolism;Organismal Systems;Metabolism;Metabolism	Global and overview maps;Global and overview maps;Environmental adaptation;Amino acid metabolism;Amino acid metabolism	ko01100//Metabolic pathways;ko01110//Biosynthesis of secondary metabolites;ko04626//Plant-pathogen interaction;ko00330//Arginine and proline metabolism;ko00220//Arginine biosynthesis	K13427;K13427;K13427;K13427;K13427	-	-	-
MSTRG.15729	0.766667	0.001	-9.58246	0.0191126	0.032063	GAT1_2.1	Non-specific lipid-transfer protein [Capsicum annuum]	-	-	-	-	-	GO:0004672//protein kinase activity;GO:0032550//purine ribonucleoside binding;GO:0046914//transition metal ion binding	GO:0006259//DNA metabolic process;GO:0006464//cellular protein modification process;GO:0006796//phosphate-containing compound metabolic process;GO:0009064//glutamine family amino acid metabolic process
MSTRG.7041	14.7667	32.8533	1.1537	3.00017e-09	1.37523e-08	--	non-specific lipid-transfer protein 1 isoform X2 [Quercus lobata]	-	-	-	-	-	-	-
CIL1417S0088	1.97333	0.776667	-1.34527	0.00167726	0.00345672	SPCC14G10.02	Npa1 domain-containing protein [Cephalotus follicularis]	-	-	-	-	-	-	-
CIL1476S0013	16.08	3.76667	-2.09391	6.71874e-13	4.51068e-12	--	NT-C2 domain-containing protein [Cephalotus follicularis]	-	-	-	-	-	-	-
CIL1363S0009	13.9233	5.7	-1.28847	7.53735e-05	0.000193645	--	NT-C2 domain-containing protein [Cephalotus follicularis]	-	-	-	-	-	-	-
CIL1481S0008	1.05333	0.22	-2.25939	0.00565693	0.0105681	--	Nucleic acid-binding proteins superfamily isoform 1 [Theobroma cacao]	-	-	-	-	-	-	GO:0003006//developmental process involved in reproduction
CIL1375S0021	9.43	0.68	-3.79365	2.32741e-15	1.98098e-14	--	NusB/RsmB/TIM44 [Corchorus olitorius]	-	-	-	-	GO:0009536//plastid	-	GO:0006355//regulation of transcription, DNA-templated;GO:0008652//cellular amino acid biosynthetic process;GO:0009886//post-embryonic morphogenesis
CIL1498S0015	4.85667	2.00667	-1.27517	0.0230781	0.0380731	--	octicosapeptide/Phox/Bem1p domain-containing family protein [Populus trichocarpa]	-	-	-	-	-	-	-
CIL1352S0017	71.3033	16.4433	-2.11647	7.51866e-13	5.02288e-12	MSR1	O-fucosyltransferase family protein [Theobroma cacao]	-	-	-	-	-	GO:0016740//transferase activity	-
CIL1321S0029	0.953333	0.001	-9.89684	9.59081e-06	2.80401e-05	OFUT34	O-fucosyltransferase family protein isoform 1 [Theobroma cacao]	-	-	-	-	-	GO:0016740//transferase activity	-
CIL1265S0082	20.9167	3.65	-2.51868	0.00884838	0.015914	OFUT9	O-fucosyltransferase family protein isoform 1 [Theobroma cacao]	-	-	-	-	-	GO:0016740//transferase activity	-
CIL1592S0030	16.04	0.53	-4.91954	8.84513e-16	7.79598e-15	OFUT29	O-FucT domain-containing protein [Cephalotus follicularis]	-	-	-	-	GO:0031984//organelle subcompartment;GO:0043231//intracellular membrane-bounded organelle	GO:0016740//transferase activity	-
CIL0156S0024	3.2	0.546667	-2.54934	4.82302e-06	1.47003e-05	OFUT16	O-FucT domain-containing protein [Cephalotus follicularis]	-	-	-	-	-	GO:0016740//transferase activity	-
CIL1600S0001	4.64	1.54	-1.59119	0.00308047	0.00606159	OFUT29	O-FucT domain-containing protein [Cephalotus follicularis]	-	-	-	-	GO:0031984//organelle subcompartment;GO:0043231//intracellular membrane-bounded organelle	GO:0016740//transferase activity	-
CIL1318S0020	2.98667	1.13	-1.40221	0.0270756	0.0440345	OFUT6	O-FucT domain-containing protein [Cephalotus follicularis]	-	-	-	-	-	-	-
MSTRG.21577	6.57333	0.783333	-3.06893	0.000166561	0.00040601	--	origin recognition complex subunit 3 [Dorcoceras hygrometricum]	-	-	-	-	-	-	-
MSTRG.26509	53.94	6.26667	-3.10559	2.2562e-17	2.25071e-16	DTC	Os05g0208000, partial [Oryza sativa Japonica Group]	-	-	-	-	GO:0005911//cell-cell junction;GO:0009526//plastid envelope;GO:0019866//organelle inner membrane;GO:0030312//external encapsulating structure;GO:0031224//intrinsic component of membrane	GO:0046943//carboxylic acid transmembrane transporter activity	GO:0006006//glucose metabolic process;GO:0006090//pyruvate metabolic process;GO:0006842//tricarboxylic acid transport;GO:0010038//response to metal ion;GO:0045333//cellular respiration;GO:1902582//single-organism intracellular transport
CIL1348S0009	221.337	533.473	1.26917	6.04873e-05	0.000157772	--	Oxidative stress 3 [Theobroma cacao]	-	-	-	-	-	-	-
CIL1342S0006	4.68333	0.4	-3.54946	0.00180193	0.00369388	--	Oxidative stress 3 [Theobroma cacao]	-	-	-	-	-	-	-
CIL0324S0002	31.5633	13.0533	-1.27383	0.00271834	0.00539881	--	PAP2_C domain-containing protein [Cephalotus follicularis]	-	-	-	-	GO:0005911//cell-cell junction	-	GO:0000097//sulfur amino acid biosynthetic process
MSTRG.18924	14.25	278.503	4.28866	2.50607e-16	2.2926e-15	--	PAR1 protein [Theobroma cacao]	-	-	-	-	GO:0009536//plastid	-	GO:0030001//metal ion transport
MSTRG.19467	9.83333	0.16	-5.94154	2.94979e-10	1.51282e-09	PATL6	patellin-6-like [Durio zibethinus]	-	-	-	-	GO:0005622//intracellular;GO:0031224//intrinsic component of membrane	-	GO:0044763//single-organism cellular process;GO:0051234//establishment of localization
CIL1425S0031	10.8967	0.303333	-5.16684	6.31446e-15	5.15361e-14	--	Pathogenic type III effector avirulence factor Avr cleavage site [Corchorus capsularis]	-	-	-	-	-	-	-
CIL1371S0020	0.343333	0.993333	1.53267	0.00330952	0.00646841	--	PB1 domain-containing protein [Cephalotus follicularis]	-	-	-	-	-	-	-
CIL0272S0007	14.7133	1.88333	-2.96576	1.90779e-16	1.76151e-15	--	Pentatricopeptide repeat (PPR) superfamily protein isoform 2 [Theobroma cacao]	-	-	-	-	-	-	-
CIL0628S0006	1.56	0.24	-2.70044	6.62805e-07	2.28189e-06	--	pentatricopeptide repeat-containing family protein [Populus trichocarpa]	-	-	-	-	-	-	-
CIL1386S0008	0.993333	0.126667	-2.97124	0.000107377	0.000268933	PCMP-E76	pentatricopeptide repeat-containing family protein [Populus trichocarpa]	-	-	-	-	-	-	-
MSTRG.14848	6.71333	2.03667	-1.72082	0.0113409	0.0199737	--	pentatricopeptide repeat-containing protein At3g22470, mitochondrial-like [Quercus lobata]	-	-	-	-	-	-	-
CIL1501S0045	0.48	2.26333	2.23734	7.93299e-05	0.000203062	NPF5.7	Peptide transporter PTR2 [Cajanus cajan]	-	-	-	-	GO:0031224//intrinsic component of membrane	-	GO:0015833//peptide transport
CIL0349S0007	1.74333	0.0833333	-4.38681	0.00336816	0.00657245	--	PHD domain-containing protein/Agenet domain-containing protein [Cephalotus follicularis]	-	-	-	-	-	-	-
CIL1618S0010	18.4833	4.9	-1.91537	3.16207e-13	2.196e-12	mlo2	PHD finger family protein [Populus trichocarpa]	-	-	-	-	-	GO:0003824//catalytic activity;GO:0046914//transition metal ion binding	-
CIL0259S0009	0.766667	2.63333	1.78022	1.64107e-05	4.64172e-05	Os04g0609600	phosphatase 2C (PP2C)-like protein [Corchorus capsularis]	-	-	-	-	-	GO:0016791//phosphatase activity	GO:0006796//phosphate-containing compound metabolic process
MSTRG.8409	5.31	0.06	-6.46761	9.7563e-06	2.8485e-05	--	Phosphatase methylesterase 1 [Gossypium australe]	-	-	-	-	-	-	-
CIL1588S0002	6.44333	0.0333333	-7.5947	1.10006e-23	1.73953e-22	--	Phosphoglucose isomerase (PGI) [Corchorus capsularis]	-	-	-	-	-	-	-
CIL0277S0001	0.973333	0.001	-9.92679	3.07284e-08	1.25061e-07	PDAT1	phospholipid:diacylglycerol acyltransferase 2 [Prunus sibirica]	Metabolism;Metabolism	Global and overview maps;Lipid metabolism	ko01100//Metabolic pathways;ko00561//Glycerolipid metabolism	K00679;K00679	GO:0031224//intrinsic component of membrane	GO:0008080//N-acetyltransferase activity	GO:0000160//phosphorelay signal transduction system;GO:0044238//primary metabolic process
CIL1555S0005	2.62333	0.29	-3.17728	1.88734e-05	5.29708e-05	CLMP1	Phox/Bem1p [Corchorus capsularis]	-	-	-	-	-	-	-
MSTRG.28378	87.7467	2.76	-4.9906	8.876e-53	6.50747e-51	--	phylloplanin-like [Ziziphus jujuba]	-	-	-	-	-	-	GO:0006950//response to stress
MSTRG.28376	17.65	0.163333	-6.75571	3.48121e-17	3.41465e-16	--	phylloplanin-like [Ziziphus jujuba]	-	-	-	-	-	-	GO:0006950//response to stress
MSTRG.18380	7.13667	0.001	-12.801	1.20848e-09	5.79258e-09	PSK6	PHYTOSULFOKINE 3 PRECURSOR [Prunus dulcis]	-	-	-	-	-	-	GO:0044699//single-organism process
MSTRG.28081	56.2133	3.26333	-4.10649	0.000476802	0.00107895	--	PHYTOSULFOKINE 3 PRECURSOR [Prunus dulcis]	-	-	-	-	-	-	GO:0044699//single-organism process
CIL1371S0004	1.10333	0.07	-3.97837	0.00502462	0.00947398	MAPKKK17	Pkinase domain-containing protein [Cephalotus follicularis]	-	-	-	-	-	GO:0004674//protein serine/threonine kinase activity;GO:0036094//small molecule binding;GO:0097159//organic cyclic compound binding;GO:1901363//heterocyclic compound binding	GO:0006468//protein phosphorylation
MSTRG.21028	3.73	0.476667	-2.96812	7.91131e-07	2.69137e-06	PK1	Pkinase domain-containing protein/S_locus_glycop domain-containing protein/B_lectin domain-containing protein [Cephalotus follicularis]	-	-	-	-	-	GO:0004672//protein kinase activity;GO:0005488//binding	GO:0006796//phosphate-containing compound metabolic process
MSTRG.7792	3.31	0.26	-3.67025	0.000406155	0.000931288	PK1	Pkinase domain-containing protein/S_locus_glycop domain-containing protein/B_lectin domain-containing protein [Cephalotus follicularis]	-	-	-	-	-	GO:0004674//protein serine/threonine kinase activity;GO:0005488//binding	GO:0006796//phosphate-containing compound metabolic process
MSTRG.21033	1.56	0.21	-2.89308	0.00128371	0.00270283	PK1	Pkinase domain-containing protein/S_locus_glycop domain-containing protein/B_lectin domain-containing protein [Cephalotus follicularis]	-	-	-	-	-	GO:0004674//protein serine/threonine kinase activity;GO:0005488//binding	GO:0006796//phosphate-containing compound metabolic process
CIL1336S0031	1.64333	0.11	-3.90105	0.00228603	0.00460364	--	plant/F25P12-18 protein [Medicago truncatula]	-	-	-	-	-	-	-
CIL1325S0047	43.2167	111.673	1.36963	3.03728e-42	1.3376e-40	PMA1	Plasma membrane ATPase 1 [Glycine soja]	Metabolism	Energy metabolism	ko00190//Oxidative phosphorylation	K01535	GO:0031224//intrinsic component of membrane	GO:0017111//nucleoside-triphosphatase activity;GO:0032550//purine ribonucleoside binding;GO:0043169//cation binding	GO:0009152//purine ribonucleotide biosynthetic process
CIL1488S0019	49.0333	19.0767	-1.36195	0.00202922	0.00412444	AHA11	plasma membrane H+-ATPase [Juglans regia]	Metabolism	Energy metabolism	ko00190//Oxidative phosphorylation	K01535	GO:0031224//intrinsic component of membrane	GO:0017111//nucleoside-triphosphatase activity;GO:0032550//purine ribonucleoside binding;GO:0043169//cation binding	GO:0009152//purine ribonucleotide biosynthetic process
CIL1385S0014	9.85333	1.41667	-2.79811	4.56448e-12	2.81202e-11	--	Plasma membrane isoform 1 [Theobroma cacao]	-	-	-	-	GO:0016020//membrane	-	-
CIL1385S0015	5.22333	1.32667	-1.97716	0.00349124	0.00679321	--	Plasma membrane isoform 1 [Theobroma cacao]	-	-	-	-	GO:0016020//membrane	-	-
CIL1385S0013	0.93	0.0366667	-4.66469	0.00840403	0.0151794	--	Plasma membrane isoform 1 [Theobroma cacao]	-	-	-	-	-	-	-
CIL1297S0016	10.9	1.3	-3.06774	1.03887e-12	6.82886e-12	--	plastid transcriptionally active 6 [Arabis alpina]	-	-	-	-	-	-	-
CIL0504S0001	2.79333	0.02	-7.12584	5.67551e-07	1.96998e-06	--	PLATZ domain-containing protein [Cephalotus follicularis]	-	-	-	-	-	-	-
CIL1294S0036	3.36	13.76	2.03395	8.11455e-14	5.94415e-13	--	PLATZ transcription factor family protein isoform 3, partial [Theobroma cacao]	-	-	-	-	-	-	-
CIL1265S0084	27.6	6.76333	-2.02886	8.05668e-10	3.94308e-09	DGUOK	P-loop containing nucleoside triphosphate hydrolases superfamily protein isoform 1 [Theobroma cacao]	-	-	-	-	GO:0043231//intracellular membrane-bounded organelle	GO:0019206//nucleoside kinase activity	GO:0009117//nucleotide metabolic process;GO:0009124//nucleoside monophosphate biosynthetic process
CIL0485S0004	0.596667	0.08	-2.89885	0.00217187	0.0043943	spast	P-loop containing nucleoside triphosphate hydrolases superfamily protein isoform 1 [Theobroma cacao]	-	-	-	-	-	GO:0003824//catalytic activity;GO:0032550//purine ribonucleoside binding	-
CIL1370S0037	2.73333	0.0233333	-6.87213	6.75599e-07	2.32221e-06	EXPA8	Pollen_allerg_1 domain-containing protein/DPBB_1 domain-containing protein [Cephalotus follicularis]	-	-	-	-	GO:0030312//external encapsulating structure	-	GO:0071555//cell wall organization
CIL1294S0037	8.74	34.2567	1.97068	4.28007e-24	6.97763e-23	--	poly polymerase [Arabidopsis thaliana]	-	-	-	-	GO:0043231//intracellular membrane-bounded organelle	-	GO:0006812//cation transport
CIL1294S0038	2.91667	12.5033	2.09992	5.7177e-07	1.98382e-06	--	poly polymerase [Arabidopsis thaliana]	-	-	-	-	GO:0043231//intracellular membrane-bounded organelle	-	GO:0006812//cation transport
CIL1332S0065	1.71	0.203333	-3.07208	0.00289455	0.00572323	--	polyamine-modulated factor 1-binding protein [Arabidopsis thaliana]	-	-	-	-	GO:0009536//plastid	-	-
MSTRG.24124	17.2	44.0767	1.35761	8.51872e-07	2.88507e-06	--	polygalacturonase-like [Hibiscus syriacus]	-	-	-	-	-	-	-
MSTRG.15572	195.423	57.1967	-1.7726	6.17208e-05	0.000160697	UBI11	Polyubiquitin [Lupinus albus]	-	-	-	-	GO:0043231//intracellular membrane-bounded organelle	-	GO:0006605//protein targeting;GO:0009411//response to UV;GO:0016567//protein ubiquitination;GO:0019941//modification-dependent protein catabolic process
MSTRG.15571	244.063	80.51	-1.60002	0.00245487	0.00491754	PCUBI4-1	Polyubiquitin 4 [Populus alba]	-	-	-	-	GO:0043231//intracellular membrane-bounded organelle	-	GO:0006605//protein targeting;GO:0009411//response to UV;GO:0016567//protein ubiquitination;GO:0019941//modification-dependent protein catabolic process
CIL1577S0014	246.413	60.2333	-2.03245	5.01372e-13	3.41036e-12	UBQ10	Polyubiquitin-A [Triticum urartu]	-	-	-	-	-	-	-
CIL1577S0026	18.7133	3.75333	-2.31782	8.42353e-08	3.24845e-07	--	Potassium/sodium hyperpolarization-activated cyclic nucleotide-gated channel 1 [Theobroma cacao]	-	-	-	-	GO:0009532//plastid stroma	-	-
CIL1393S0073	4.11	0.406667	-3.33722	3.10349e-12	1.94115e-11	PCMP-E20	PPR domain-containing protein/PPR_2 domain-containing protein [Cephalotus follicularis]	-	-	-	-	-	-	-
CIL0267S0003	6.23333	1.47667	-2.07766	0.000860827	0.00186605	PCMP-E50	PPR domain-containing protein/PPR_2 domain-containing protein [Cephalotus follicularis]	-	-	-	-	-	-	-
CIL1401S0040	2.60667	0.633333	-2.04117	0.0109842	0.0194037	PCMP-H12	PPR domain-containing protein/PPR_2 domain-containing protein [Cephalotus follicularis]	-	-	-	-	-	-	-
CIL1391S0023	1.42	0.296667	-2.25898	0.00406194	0.00780134	PCMP-E30	PPR domain-containing protein/PPR_2 domain-containing protein/PPR_3 domain-containing protein [Cephalotus follicularis]	-	-	-	-	-	-	-
CIL0047S0021	10.6467	4.43667	-1.26285	0.0131054	0.0227935	PCMP-H42	PPR domain-containing protein/PPR_2 domain-containing protein/PPR_3 domain-containing protein [Cephalotus follicularis]	-	-	-	-	-	-	-
CIL1306S0015	3.28	0.593333	-2.46678	4.65294e-05	0.000123411	PCMP-H81	PPR domain-containing protein/PPR_2 domain-containing protein/PPR_3 domain-containing protein, partial [Cephalotus follicularis]	-	-	-	-	GO:0043231//intracellular membrane-bounded organelle	-	GO:0001101//response to acid chemical;GO:0006950//response to stress;GO:0016556//mRNA modification
MSTRG.12070	0.386667	91.46	7.88591	1.35649e-21	1.86505e-20	VIT_19s0014g04930	PREDICTED: (-)-germacrene D synthase-like [Juglans regia]	Metabolism	Metabolism of terpenoids and polyketides	ko00909//Sesquiterpenoid and triterpenoid biosynthesis	K15803	-	GO:0010333//terpene synthase activity;GO:0046872//metal ion binding	GO:0006644//phospholipid metabolic process;GO:0006721//terpenoid metabolic process
MSTRG.4193	34.87	0.0266667	-10.3527	6.86871e-20	8.29096e-19	VIT_19s0014g04930	PREDICTED: (-)-germacrene D synthase-like [Juglans regia]	Metabolism	Metabolism of terpenoids and polyketides	ko00909//Sesquiterpenoid and triterpenoid biosynthesis	K15803	-	GO:0010333//terpene synthase activity;GO:0046872//metal ion binding	GO:0006644//phospholipid metabolic process;GO:0006721//terpenoid metabolic process
MSTRG.28314	2.75333	115.513	5.39074	1.71341e-14	1.33227e-13	VIT_19s0014g04930	PREDICTED: (-)-germacrene D synthase-like [Juglans regia]	Metabolism	Metabolism of terpenoids and polyketides	ko00909//Sesquiterpenoid and triterpenoid biosynthesis	K15803	-	GO:0010333//terpene synthase activity;GO:0046872//metal ion binding	GO:0006644//phospholipid metabolic process;GO:0006721//terpenoid metabolic process
MSTRG.15539	44.4767	2.92333	-3.92736	6.07588e-06	1.82708e-05	VIT_19s0014g04930	PREDICTED: (-)-germacrene D synthase-like [Juglans regia]	Metabolism	Metabolism of terpenoids and polyketides	ko00909//Sesquiterpenoid and triterpenoid biosynthesis	K15803	-	GO:0010333//terpene synthase activity;GO:0046872//metal ion binding	GO:0006644//phospholipid metabolic process;GO:0006721//terpenoid metabolic process
CIL1372S0003	0.923333	0.001	-9.85071	0.00587298	0.0109283	ValCS	PREDICTED: (-)-germacrene D synthase-like isoform X2 [Juglans regia]	Metabolism	Metabolism of terpenoids and polyketides	ko00909//Sesquiterpenoid and triterpenoid biosynthesis	K15803	-	-	-
MSTRG.27735	0.001	4.18667	12.0316	3.3768e-11	1.91359e-10	VIT_19s0014g04930	PREDICTED: (-)-germacrene D synthase-like, partial [Juglans regia]	Metabolism	Metabolism of terpenoids and polyketides	ko00909//Sesquiterpenoid and triterpenoid biosynthesis	K15803	-	GO:0010333//terpene synthase activity;GO:0046872//metal ion binding	GO:0006644//phospholipid metabolic process
MSTRG.24122	0.0133333	1.51333	6.82655	4.42453e-06	1.35562e-05	VIT_19s0014g04930	PREDICTED: (-)-germacrene D synthase-like, partial [Juglans regia]	Metabolism	Metabolism of terpenoids and polyketides	ko00909//Sesquiterpenoid and triterpenoid biosynthesis	K15803	-	GO:0010333//terpene synthase activity;GO:0046872//metal ion binding	GO:0006644//phospholipid metabolic process
MSTRG.6044	14.4033	35.9433	1.31932	1.49316e-21	2.04641e-20	NEPS1	PREDICTED: (-)-isopiperitenol/(-)-carveol dehydrogenase, mitochondrial-like [Juglans regia]	-	-	-	-	-	GO:0016491//oxidoreductase activity	GO:0044710//single-organism metabolic process
MSTRG.6045	0.386667	1.11667	1.53004	0.00102609	0.00219627	NEPS1	PREDICTED: (-)-isopiperitenol/(-)-carveol dehydrogenase, mitochondrial-like [Juglans regia]	-	-	-	-	-	GO:0016491//oxidoreductase activity	-
MSTRG.24439	2.53667	0.643333	-1.9793	0.0211098	0.0350883	NEPS1	PREDICTED: (-)-isopiperitenol/(-)-carveol dehydrogenase, mitochondrial-like [Juglans regia]	-	-	-	-	-	GO:0033764//steroid dehydrogenase activity, acting on the CH-OH group of donors, NAD or NADP as acceptor;GO:0036094//small molecule binding	GO:0016099//monoterpenoid biosynthetic process
CIL1384S0004	6.47	0.0933333	-6.11523	3.55208e-09	1.61331e-08	SDR1	PREDICTED: (+)-neomenthol dehydrogenase-like [Juglans regia]	Metabolism;Metabolism	Global and overview maps;Metabolism of terpenoids and polyketides	ko01110//Biosynthesis of secondary metabolites;ko00902//Monoterpenoid biosynthesis	K15095;K15095	-	GO:0016616//oxidoreductase activity, acting on the CH-OH group of donors, NAD or NADP as acceptor	GO:0044710//single-organism metabolic process
MSTRG.6278	1.06333	0.0533333	-4.31741	0.0104822	0.0185908	SALR	PREDICTED: (+)-neomenthol dehydrogenase-like, partial [Juglans regia]	Metabolism;Metabolism	Global and overview maps;Metabolism of terpenoids and polyketides	ko01110//Biosynthesis of secondary metabolites;ko00902//Monoterpenoid biosynthesis	K15095;K15095	-	GO:0016491//oxidoreductase activity	GO:0008152//metabolic process
CIL1276S0037	0.001	5.35667	12.3871	9.75577e-06	2.8485e-05	TPS13	PREDICTED: (3S,6E)-nerolidol synthase 1-like [Juglans regia]	Metabolism;Metabolism	Global and overview maps;Metabolism of terpenoids and polyketides	ko01100//Metabolic pathways;ko00909//Sesquiterpenoid and triterpenoid biosynthesis	K14175;K14175	GO:0009536//plastid	GO:0016829//lyase activity;GO:0046872//metal ion binding	GO:0008152//metabolic process
CIL0294S0009	0.04	2.27333	5.82867	2.88455e-05	7.87658e-05	TPS13	PREDICTED: (3S,6E)-nerolidol synthase 1-like [Juglans regia]	Metabolism;Metabolism	Global and overview maps;Metabolism of terpenoids and polyketides	ko01100//Metabolic pathways;ko00909//Sesquiterpenoid and triterpenoid biosynthesis	K14175;K14175	GO:0043231//intracellular membrane-bounded organelle;GO:0044444//cytoplasmic part	-	-
CIL1541S0026	3.46333	0.001	-11.7579	3.20236e-05	8.69106e-05	OMT1	PREDICTED: (R,S)-reticuline 7-O-methyltransferase-like [Juglans regia]	-	-	-	-	-	-	-
CIL1483S0005	2.45	0.001	-11.2586	8.9274e-08	3.43045e-07	7OMT	PREDICTED: (R,S)-reticuline 7-O-methyltransferase-like isoform X1 [Juglans regia]	-	-	-	-	-	GO:0005515//protein binding;GO:0008171//O-methyltransferase activity	GO:0008152//metabolic process
CIL1531S0004	80.37	16.0833	-2.32109	4.30631e-18	4.56398e-17	SBEII	PREDICTED: 1,4-alpha-glucan-branching enzyme 1, chloroplastic/amyloplastic-like [Juglans regia]	Metabolism;Metabolism;Metabolism	Global and overview maps;Global and overview maps;Carbohydrate metabolism	ko01100//Metabolic pathways;ko01110//Biosynthesis of secondary metabolites;ko00500//Starch and sucrose metabolism	K00700;K00700;K00700	-	GO:0016758//transferase activity, transferring hexosyl groups;GO:0016798//hydrolase activity, acting on glycosyl bonds;GO:0043167//ion binding	GO:0005977//glycogen metabolic process
CIL1417S0045	2.94667	0.133333	-4.46597	5.87302e-16	5.2336e-15	SBE3	PREDICTED: 1,4-alpha-glucan-branching enzyme 3, chloroplastic/amyloplastic isoform X1 [Juglans regia]	Metabolism;Metabolism;Metabolism	Global and overview maps;Global and overview maps;Carbohydrate metabolism	ko01100//Metabolic pathways;ko01110//Biosynthesis of secondary metabolites;ko00500//Starch and sucrose metabolism	K00700;K00700;K00700	GO:0009532//plastid stroma	GO:0016758//transferase activity, transferring hexosyl groups;GO:0016798//hydrolase activity, acting on glycosyl bonds;GO:0043167//ion binding	GO:0005977//glycogen metabolic process;GO:0005982//starch metabolic process;GO:0044707//single-multicellular organism process
CIL1265S0095	609.113	122.25	-2.31688	1.14076e-07	4.3192e-07	OPR1	PREDICTED: 12-oxophytodienoate reductase 2-like [Juglans regia]	Metabolism;Metabolism;Metabolism	Global and overview maps;Global and overview maps;Lipid metabolism	ko01100//Metabolic pathways;ko01110//Biosynthesis of secondary metabolites;ko00592//alpha-Linolenic acid metabolism	K05894;K05894;K05894	-	-	-
CIL1305S0033	2.35333	46.64	4.30879	2.56488e-07	9.29921e-07	OPR1	PREDICTED: 12-oxophytodienoate reductase 2-like [Juglans regia]	Metabolism;Metabolism;Metabolism	Global and overview maps;Global and overview maps;Lipid metabolism	ko01100//Metabolic pathways;ko01110//Biosynthesis of secondary metabolites;ko00592//alpha-Linolenic acid metabolism	K05894;K05894;K05894	-	GO:0003824//catalytic activity;GO:0032553//ribonucleotide binding	GO:0044710//single-organism metabolic process
CIL1271S0005	122.577	0.03	-11.9964	4.05894e-21	5.36075e-20	AZI1	PREDICTED: 14 kDa proline-rich protein DC2.15-like [Juglans regia]	-	-	-	-	-	-	-
CIL0143S0027	21.18	7.48667	-1.50031	0.0112025	0.0197528	TFT6	PREDICTED: 14-3-3-like protein [Juglans regia]	-	-	-	-	-	-	-
CIL1401S0022	76.2267	196.09	1.36315	6.32455e-15	5.16021e-14	GRF8	PREDICTED: 14-3-3-like protein GF14 kappa [Juglans regia]	-	-	-	-	GO:0005618//cell wall;GO:0009526//plastid envelope;GO:0016020//membrane	GO:0016817//hydrolase activity, acting on acid anhydrides;GO:0051219//phosphoprotein binding	GO:0009404//toxin metabolic process;GO:0009685//gibberellin metabolic process;GO:0010468//regulation of gene expression;GO:0010476//gibberellin mediated signaling pathway;GO:0034645//cellular macromolecule biosynthetic process;GO:0043401//steroid hormone mediated signaling pathway;GO:0048827//phyllome development
CIL1512S0026	727.503	91.59	-2.98969	0.000330965	0.000770102	HSP17.9-D	PREDICTED: 17.3 kDa class II heat shock protein-like [Juglans regia]	Genetic Information Processing	Folding, sorting and degradation	ko04141//Protein processing in endoplasmic reticulum	K13993	-	-	-
CIL1320S0012	274.247	9.36667	-4.87179	2.37204e-09	1.1008e-08	HSP17.6C	PREDICTED: 17.4 kDa class I heat shock protein-like [Juglans regia]	Genetic Information Processing	Folding, sorting and degradation	ko04141//Protein processing in endoplasmic reticulum	K13993	-	-	-
CIL1295S0082	287.707	5.96	-5.59314	2.2788e-13	1.60637e-12	HSP17.4B	PREDICTED: 17.4 kDa class III heat shock protein-like [Juglans regia]	Genetic Information Processing	Folding, sorting and degradation	ko04141//Protein processing in endoplasmic reticulum	K13993	-	-	-
MSTRG.12214	6.72	0.216667	-4.95491	0.000229376	0.000546888	--	PREDICTED: 17.6 kDa class I heat shock protein-like [Juglans regia]	Genetic Information Processing	Folding, sorting and degradation	ko04141//Protein processing in endoplasmic reticulum	K13993	-	-	-
CIL1512S0030	96.8833	9.55	-3.34268	6.50047e-06	1.94614e-05	HSP17.9-D	PREDICTED: 17.9 kDa class II heat shock protein-like [Juglans regia]	Genetic Information Processing	Folding, sorting and degradation	ko04141//Protein processing in endoplasmic reticulum	K13993	-	-	-
CIL0381S0004	7.16333	2.21333	-1.69441	0.00836476	0.0151137	HSP18.2	PREDICTED: 18.1 kDa class I heat shock protein-like [Juglans regia]	Genetic Information Processing	Folding, sorting and degradation	ko04141//Protein processing in endoplasmic reticulum	K13993	-	-	-
CIL0225S0015	52.8133	18.2	-1.53696	6.99794e-06	2.08468e-05	AIR9	PREDICTED: 187-kDa microtubule-associated protein AIR9-like [Juglans regia]	-	-	-	-	-	-	-
CIL1417S0084	0.773333	0.0766667	-3.33442	0.00495307	0.00935138	PLSC	PREDICTED: 1-acyl-sn-glycerol-3-phosphate acyltransferase-like [Juglans regia]	-	-	-	-	-	-	-
CIL1405S0027	4.09333	0.776667	-2.39791	1.08146e-07	4.10609e-07	PLSC	PREDICTED: 1-acyl-sn-glycerol-3-phosphate acyltransferase-like isoform X1 [Juglans regia]	-	-	-	-	-	GO:0016740//transferase activity	GO:0006644//phospholipid metabolic process
CIL1448S0019	10.82	287.353	4.73105	2.47098e-28	5.19288e-27	ACO	PREDICTED: 1-aminocyclopropane-1-carboxylate oxidase [Juglans regia]	Metabolism;Metabolism;Metabolism	Global and overview maps;Global and overview maps;Amino acid metabolism	ko01100//Metabolic pathways;ko01110//Biosynthesis of secondary metabolites;ko00270//Cysteine and methionine metabolism	K05933;K05933;K05933	-	-	-
CIL1407S0018	104.013	651.997	2.6481	1.88572e-12	1.20487e-11	ACO1	PREDICTED: 1-aminocyclopropane-1-carboxylate oxidase 1-like isoform X1 [Juglans regia]	Metabolism;Metabolism;Metabolism	Global and overview maps;Global and overview maps;Amino acid metabolism	ko01100//Metabolic pathways;ko01110//Biosynthesis of secondary metabolites;ko00270//Cysteine and methionine metabolism	K05933;K05933;K05933	-	GO:0016705//oxidoreductase activity, acting on paired donors, with incorporation or reduction of molecular oxygen;GO:0043169//cation binding	GO:0044710//single-organism metabolic process
CIL1354S0054	25.1267	9.08	-1.46846	0.00428795	0.00819636	At1g06620	PREDICTED: 1-aminocyclopropane-1-carboxylate oxidase homolog 1-like [Juglans regia]	-	-	-	-	-	-	-
CIL0001S0013	3.48667	64.6433	4.21258	8.69239e-46	4.51357e-44	At1g06650	PREDICTED: 1-aminocyclopropane-1-carboxylate oxidase homolog 4-like [Juglans regia]	-	-	-	-	-	GO:0016705//oxidoreductase activity, acting on paired donors, with incorporation or reduction of molecular oxygen;GO:0043169//cation binding	GO:0044710//single-organism metabolic process
CIL1555S0004	0.876667	7.08667	3.01501	6.23582e-14	4.61508e-13	ACO	PREDICTED: 1-aminocyclopropane-1-carboxylate oxidase-like [Juglans regia]	Metabolism;Metabolism;Metabolism	Global and overview maps;Global and overview maps;Amino acid metabolism	ko01100//Metabolic pathways;ko01110//Biosynthesis of secondary metabolites;ko00270//Cysteine and methionine metabolism	K05933;K05933;K05933	-	GO:0016705//oxidoreductase activity, acting on paired donors, with incorporation or reduction of molecular oxygen;GO:0043169//cation binding	GO:0044710//single-organism metabolic process
CIL1268S0044	1.23	0.001	-10.2644	8.76613e-06	2.5775e-05	F3H-2	PREDICTED: 1-aminocyclopropane-1-carboxylate oxidase-like [Juglans regia]	-	-	-	-	-	-	-
CIL0344S0007	0.716667	0.02	-5.16323	0.00322581	0.00632202	FLS	PREDICTED: 1-aminocyclopropane-1-carboxylate oxidase-like [Juglans regia]	-	-	-	-	-	-	-
CIL1266S0027	5.00667	25.5167	2.34952	0.00364825	0.00707631	ACS1	PREDICTED: 1-aminocyclopropane-1-carboxylate synthase-like [Juglans regia]	Metabolism;Metabolism;Environmental Information Processing;Metabolism	Global and overview maps;Global and overview maps;Signal transduction;Amino acid metabolism	ko01100//Metabolic pathways;ko01110//Biosynthesis of secondary metabolites;ko04016//MAPK signaling pathway - plant;ko00270//Cysteine and methionine metabolism	K20772;K20772;K20772;K20772	-	GO:0043168//anion binding	GO:0008152//metabolic process
CIL1264S0048	32.8167	110.267	1.7485	2.68891e-15	2.27891e-14	PMEI10	PREDICTED: 21 kDa protein [Juglans regia]	-	-	-	-	-	-	GO:0008152//metabolic process
CIL1354S0037	8.15667	0.001	-12.9938	1.47676e-11	8.6793e-11	PMEI3	PREDICTED: 21 kDa protein [Juglans regia]	-	-	-	-	-	GO:0052689//carboxylic ester hydrolase activity	GO:0009892//negative regulation of metabolic process
CIL1531S0028	113.553	0.26	-8.77064	1.00049e-60	1.01652e-58	PMEI11	PREDICTED: 21 kDa protein-like [Juglans regia]	-	-	-	-	-	GO:0052689//carboxylic ester hydrolase activity	GO:0009892//negative regulation of metabolic process
CIL1531S0031	57.9833	1.42	-5.35168	1.67891e-07	6.21898e-07	PMEI7	PREDICTED: 21 kDa protein-like [Juglans regia]	-	-	-	-	-	GO:0052689//carboxylic ester hydrolase activity	GO:0009892//negative regulation of metabolic process
CIL1602S0016	36.3067	12.7633	-1.50823	1.4379e-06	4.72049e-06	NOP2	PREDICTED: 25S rRNA (cytosine-C(5))-methyltransferase nop2-like [Juglans regia]	-	-	-	-	-	-	-
CIL0286S0013	30.89	2.3	-3.74743	2.29628e-33	6.28421e-32	CP29B	PREDICTED: 28 kDa ribonucleoprotein, chloroplastic-like [Juglans regia]	-	-	-	-	-	-	-
CIL1550S0024	5.73333	1.25333	-2.1936	1.89558e-05	5.31903e-05	CP31A	PREDICTED: 29 kDa ribonucleoprotein, chloroplastic [Juglans regia]	Genetic Information Processing;Genetic Information Processing;Genetic Information Processing	Translation;Translation;Folding, sorting and degradation	ko03013//RNA transport;ko03015//mRNA surveillance pathway;ko03018//RNA degradation	K13126;K13126;K13126	-	-	-
CIL0318S0001	61.0367	0.753333	-6.34024	1.55766e-37	5.3243e-36	DBR	PREDICTED: 2-alkenal reductase (NADP(+)-dependent)-like [Juglans regia]	-	-	-	-	-	-	-
MSTRG.24691	0.06	6.75	6.81378	1.41072e-17	1.43219e-16	DBR	PREDICTED: 2-alkenal reductase (NADP(+)-dependent)-like [Juglans regia]	-	-	-	-	-	GO:0016628//oxidoreductase activity, acting on the CH-CH group of donors, NAD or NADP as acceptor	GO:0044710//single-organism metabolic process
CIL0391S0010	13.88	80.27	2.53185	5.83777e-12	3.56327e-11	DBR	PREDICTED: 2-alkenal reductase (NADP(+)-dependent)-like [Juglans regia]	-	-	-	-	-	-	-
CIL1341S0039	17.61	79.2367	2.16977	4.02825e-07	1.42407e-06	DBR	PREDICTED: 2-alkenal reductase (NADP(+)-dependent)-like [Juglans regia]	-	-	-	-	-	-	-
MSTRG.4762	2.98667	9.88	1.72597	4.85516e-06	1.47948e-05	DBR	PREDICTED: 2-alkenal reductase (NADP(+)-dependent)-like [Juglans regia]	-	-	-	-	-	GO:0016491//oxidoreductase activity;GO:0046914//transition metal ion binding	GO:0006950//response to stress;GO:0044710//single-organism metabolic process
CIL1431S0026	3.20333	9.18333	1.51944	0.0231092	0.0381195	DBR	PREDICTED: 2-alkenal reductase (NADP(+)-dependent)-like [Juglans regia]	-	-	-	-	-	GO:0003824//catalytic activity	GO:0044710//single-organism metabolic process
MSTRG.4109	5.36333	1.09667	-2.29	0.00619007	0.0114662	CXE4	PREDICTED: 2-hydroxyisoflavanone dehydratase-like [Juglans regia]	-	-	-	-	-	GO:0003824//catalytic activity	GO:0006281//DNA repair
CIL0027S0011	25.43	1.00667	-4.65887	1.53957e-26	2.93657e-25	DAO	PREDICTED: 2-oxoglutarate-dependent dioxygenase DAO-like isoform X1 [Juglans regia]	-	-	-	-	-	GO:0016491//oxidoreductase activity	-
CIL1365S0004	0.573333	1.24	1.11289	0.0176591	0.0298544	DAO	PREDICTED: 2-oxoglutarate-dependent dioxygenase DAO-like isoform X1 [Juglans regia]	-	-	-	-	-	GO:0016706//oxidoreductase activity, acting on paired donors, with incorporation or reduction of molecular oxygen, 2-oxoglutarate as one donor, and incorporation of one atom each of oxygen into both donors	-
CIL1582S0018	3.81	8.81	1.20935	1.36035e-10	7.2132e-10	At5g09300	PREDICTED: 2-oxoisovalerate dehydrogenase subunit alpha 2, mitochondrial-like isoform X2 [Juglans regia]	Metabolism;Metabolism;Metabolism;Metabolism	Global and overview maps;Global and overview maps;Amino acid metabolism;Carbohydrate metabolism	ko01100//Metabolic pathways;ko01110//Biosynthesis of secondary metabolites;ko00280//Valine, leucine and isoleucine degradation;ko00640//Propanoate metabolism	K00166;K00166;K00166;K00166	GO:0005739//mitochondrion	GO:0016491//oxidoreductase activity	GO:0008152//metabolic process
CIL1582S0017	2.97	6.97333	1.23139	0.000520568	0.00117167	At5g09300	PREDICTED: 2-oxoisovalerate dehydrogenase subunit alpha 2, mitochondrial-like isoform X2 [Juglans regia]	Metabolism;Metabolism;Metabolism;Metabolism	Global and overview maps;Global and overview maps;Amino acid metabolism;Carbohydrate metabolism	ko01100//Metabolic pathways;ko01110//Biosynthesis of secondary metabolites;ko00280//Valine, leucine and isoleucine degradation;ko00640//Propanoate metabolism	K00166;K00166;K00166;K00166	GO:0044429//mitochondrial part	GO:0016903//oxidoreductase activity, acting on the aldehyde or oxo group of donors;GO:0043169//cation binding	GO:0044710//single-organism metabolic process
CIL1300S0015	7.70333	0.15	-5.68245	3.03284e-10	1.55387e-09	MENG	PREDICTED: 2-phytyl-1,4-beta-naphthoquinone methyltransferase, chloroplastic isoform X2 [Juglans regia]	Metabolism;Metabolism;Metabolism	Global and overview maps;Global and overview maps;Metabolism of cofactors and vitamins	ko01100//Metabolic pathways;ko01110//Biosynthesis of secondary metabolites;ko00130//Ubiquinone and other terpenoid-quinone biosynthesis	K03183;K03183;K03183	GO:0009536//plastid	GO:0008169//C-methyltransferase activity	GO:0042374//phylloquinone metabolic process
CIL1286S0039	34.8767	0.0133333	-11.353	1.15492e-17	1.18368e-16	AAE14	PREDICTED: 2-succinylbenzoate--CoA ligase, chloroplastic/peroxisomal-like [Juglans regia]	Metabolism;Metabolism;Metabolism	Global and overview maps;Global and overview maps;Metabolism of cofactors and vitamins	ko01100//Metabolic pathways;ko01110//Biosynthesis of secondary metabolites;ko00130//Ubiquinone and other terpenoid-quinone biosynthesis	K14760;K14760;K14760	GO:0005777//peroxisome;GO:0009536//plastid;GO:0031090//organelle membrane;GO:0044446//intracellular organelle part	GO:0016874//ligase activity	GO:0008152//metabolic process
CIL0225S0017	26.8367	74.54	1.47381	6.42903e-30	1.47479e-28	CPSF30	PREDICTED: 30-kDa cleavage and polyadenylation specificity factor 30-like [Juglans regia]	Genetic Information Processing	Translation	ko03015//mRNA surveillance pathway	K14404	-	-	-
CIL1500S0023	29.2967	9.85333	-1.57205	2.88683e-05	7.88114e-05	RPS1	PREDICTED: 30S ribosomal protein S1, chloroplastic-like isoform X2 [Juglans regia]	Genetic Information Processing	Translation	ko03010//Ribosome	K02945	-	-	-
CIL0121S0005	19.0967	2.72333	-2.80988	2.92741e-14	2.22986e-13	RPS17	PREDICTED: 30S ribosomal protein S17, chloroplastic-like [Juglans regia]	Genetic Information Processing	Translation	ko03010//Ribosome	K02961	GO:0000314//organellar small ribosomal subunit;GO:0009526//plastid envelope;GO:0009532//plastid stroma;GO:0031976//plastid thylakoid	GO:0003723//RNA binding;GO:0005198//structural molecule activity	GO:0006412//translation
CIL1343S0030	17.1867	4.90667	-1.80847	5.90387e-06	1.77971e-05	RPS20	PREDICTED: 30S ribosomal protein S20, chloroplastic [Juglans regia]	Genetic Information Processing	Translation	ko03010//Ribosome	K02968	GO:0009526//plastid envelope;GO:0009532//plastid stroma;GO:0030529//intracellular ribonucleoprotein complex	GO:0003723//RNA binding;GO:0005198//structural molecule activity	GO:0006779//porphyrin-containing compound biosynthetic process;GO:0010467//gene expression;GO:0016072//rRNA metabolic process
CIL1358S0001	255.667	1.46333	-7.44886	1.89297e-21	2.5671e-20	TPRP-F1	PREDICTED: 36.4 kDa proline-rich protein isoform X1 [Juglans regia]	-	-	-	-	-	-	-
CIL1321S0030	0.753333	0.001	-9.55714	0.000950901	0.00204465	--	PREDICTED: 36.4 kDa proline-rich protein-like [Juglans regia]	-	-	-	-	-	-	-
CIL1528S0012	1.73	3.60333	1.05856	7.31643e-12	4.42087e-11	TSC10B	PREDICTED: 3-dehydrosphinganine reductase TSC10A-like isoform X1 [Juglans regia]	Metabolism;Metabolism	Global and overview maps;Lipid metabolism	ko01100//Metabolic pathways;ko00600//Sphingolipid metabolism	K04708;K04708	-	GO:0003824//catalytic activity	GO:0044710//single-organism metabolic process
CIL1317S0056	0.7	0.001	-9.45121	0.00107273	0.00228924	CYP90D1	PREDICTED: 3-epi-6-deoxocathasterone 23-monooxygenase [Juglans regia]	Metabolism;Metabolism;Metabolism	Global and overview maps;Global and overview maps;Metabolism of terpenoids and polyketides	ko01100//Metabolic pathways;ko01110//Biosynthesis of secondary metabolites;ko00905//Brassinosteroid biosynthesis	K12638;K12638;K12638	-	GO:0016491//oxidoreductase activity;GO:0046906//tetrapyrrole binding;GO:0046914//transition metal ion binding	GO:0044710//single-organism metabolic process
CIL1273S0026	12.64	1.78	-2.82805	0.000307174	0.000718281	HMG1	PREDICTED: 3-hydroxy-3-methylglutaryl-coenzyme A reductase 1 [Juglans regia]	Metabolism;Metabolism;Metabolism	Global and overview maps;Global and overview maps;Metabolism of terpenoids and polyketides	ko01100//Metabolic pathways;ko01110//Biosynthesis of secondary metabolites;ko00900//Terpenoid backbone biosynthesis	K00021;K00021;K00021	GO:0031090//organelle membrane;GO:0031224//intrinsic component of membrane;GO:0043231//intracellular membrane-bounded organelle	GO:0000166//nucleotide binding;GO:0016614//oxidoreductase activity, acting on CH-OH group of donors;GO:0048037//cofactor binding	GO:0006720//isoprenoid metabolic process;GO:0006732//coenzyme metabolic process
CIL1446S0042	159.247	874.137	2.4566	1.20847e-41	5.1379e-40	HMG1	PREDICTED: 3-hydroxy-3-methylglutaryl-coenzyme A reductase 1-like [Juglans regia]	Metabolism;Metabolism;Metabolism	Global and overview maps;Global and overview maps;Metabolism of terpenoids and polyketides	ko01100//Metabolic pathways;ko01110//Biosynthesis of secondary metabolites;ko00900//Terpenoid backbone biosynthesis	K00021;K00021;K00021	-	-	-
CIL1446S0043	22.4167	71.9133	1.68169	5.9781e-11	3.2944e-10	HMG1	PREDICTED: 3-hydroxy-3-methylglutaryl-coenzyme A reductase 1-like [Juglans regia]	Metabolism;Metabolism;Metabolism	Global and overview maps;Global and overview maps;Metabolism of terpenoids and polyketides	ko01100//Metabolic pathways;ko01110//Biosynthesis of secondary metabolites;ko00900//Terpenoid backbone biosynthesis	K00021;K00021;K00021	-	-	-
CIL0424S0003	4.16667	1.00667	-2.04931	0.000139181	0.000343356	fabZ	PREDICTED: 3-hydroxyacyl-[acyl-carrier-protein] dehydratase FabZ-like [Ziziphus jujuba]	Metabolism;Metabolism;Metabolism;Metabolism	Global and overview maps;Global and overview maps;Lipid metabolism;Metabolism of cofactors and vitamins	ko01100//Metabolic pathways;ko01212//Fatty acid metabolism;ko00061//Fatty acid biosynthesis;ko00780//Biotin metabolism	K02372;K02372;K02372;K02372	-	GO:0016835//carbon-oxygen lyase activity	GO:0006631//fatty acid metabolic process
CIL1609S0010	8.70333	2.74333	-1.66564	9.90988e-05	0.000249994	At3g60510	PREDICTED: 3-hydroxyisobutyryl-CoA hydrolase-like protein 1, mitochondrial [Juglans regia]	Metabolism;Metabolism;Metabolism;Metabolism;Metabolism	Global and overview maps;Global and overview maps;Amino acid metabolism;Metabolism of other amino acids;Carbohydrate metabolism	ko01100//Metabolic pathways;ko01200//Carbon metabolism;ko00280//Valine, leucine and isoleucine degradation;ko00410//beta-Alanine metabolism;ko00640//Propanoate metabolism	K05605;K05605;K05605;K05605;K05605	-	GO:0016836//hydro-lyase activity	-
CIL1300S0054	28.6267	7.59	-1.91519	1.48299e-07	5.52816e-07	At4g31810	PREDICTED: 3-hydroxyisobutyryl-CoA hydrolase-like protein 2, mitochondrial [Juglans regia]	Metabolism;Metabolism;Metabolism;Metabolism;Metabolism	Global and overview maps;Global and overview maps;Amino acid metabolism;Metabolism of other amino acids;Carbohydrate metabolism	ko01100//Metabolic pathways;ko01200//Carbon metabolism;ko00280//Valine, leucine and isoleucine degradation;ko00410//beta-Alanine metabolism;ko00640//Propanoate metabolism	K05605;K05605;K05605;K05605;K05605	GO:0043231//intracellular membrane-bounded organelle	GO:0016787//hydrolase activity	GO:0000338//protein deneddylation;GO:0006221//pyrimidine nucleotide biosynthetic process;GO:0009639//response to red or far red light;GO:0016571//histone methylation;GO:0048580//regulation of post-embryonic development
CIL1294S0006	309.907	8.39	-5.20702	2.2736e-88	5.14692e-86	At1g06550	PREDICTED: 3-hydroxyisobutyryl-CoA hydrolase-like protein 5 isoform X2 [Juglans regia]	Metabolism;Metabolism;Metabolism;Metabolism;Metabolism	Global and overview maps;Global and overview maps;Amino acid metabolism;Metabolism of other amino acids;Carbohydrate metabolism	ko01100//Metabolic pathways;ko01200//Carbon metabolism;ko00280//Valine, leucine and isoleucine degradation;ko00410//beta-Alanine metabolism;ko00640//Propanoate metabolism	K05605;K05605;K05605;K05605;K05605	-	GO:0016787//hydrolase activity;GO:0016836//hydro-lyase activity	GO:0019538//protein metabolic process
CIL1516S0016	36.46	258.943	2.82825	3.13495e-11	1.78399e-10	FDH	PREDICTED: 3-ketoacyl-CoA synthase 10 [Juglans regia]	Metabolism;Metabolism;Organismal Systems;Metabolism	Global and overview maps;Global and overview maps;Environmental adaptation;Lipid metabolism	ko01100//Metabolic pathways;ko01110//Biosynthesis of secondary metabolites;ko04626//Plant-pathogen interaction;ko00062//Fatty acid elongation	K15397;K15397;K15397;K15397	GO:0031224//intrinsic component of membrane;GO:0043231//intracellular membrane-bounded organelle	GO:0016746//transferase activity, transferring acyl groups	GO:0006631//fatty acid metabolic process;GO:0007275//multicellular organism development
CIL1332S0035	1.37	0.06	-4.51307	2.95483e-07	1.06102e-06	KCS11	PREDICTED: 3-ketoacyl-CoA synthase 11-like [Juglans regia]	Metabolism;Metabolism;Organismal Systems;Metabolism	Global and overview maps;Global and overview maps;Environmental adaptation;Lipid metabolism	ko01100//Metabolic pathways;ko01110//Biosynthesis of secondary metabolites;ko04626//Plant-pathogen interaction;ko00062//Fatty acid elongation	K15397;K15397;K15397;K15397	-	GO:0016746//transferase activity, transferring acyl groups	GO:0006631//fatty acid metabolic process
CIL1274S0062	1.02333	0.001	-9.99906	0.000205942	0.000494717	KCS12	PREDICTED: 3-ketoacyl-CoA synthase 12-like [Juglans regia]	Metabolism;Metabolism;Organismal Systems;Metabolism	Global and overview maps;Global and overview maps;Environmental adaptation;Lipid metabolism	ko01100//Metabolic pathways;ko01110//Biosynthesis of secondary metabolites;ko04626//Plant-pathogen interaction;ko00062//Fatty acid elongation	K15397;K15397;K15397;K15397	-	GO:0016746//transferase activity, transferring acyl groups	GO:0006631//fatty acid metabolic process
CIL1546S0025	2.51333	0.17	-3.886	1.77313e-06	5.76145e-06	KCS19	PREDICTED: 3-ketoacyl-CoA synthase 19-like [Juglans regia]	Metabolism;Metabolism;Organismal Systems;Metabolism	Global and overview maps;Global and overview maps;Environmental adaptation;Lipid metabolism	ko01100//Metabolic pathways;ko01110//Biosynthesis of secondary metabolites;ko04626//Plant-pathogen interaction;ko00062//Fatty acid elongation	K15397;K15397;K15397;K15397	-	GO:0016746//transferase activity, transferring acyl groups	GO:0006631//fatty acid metabolic process
MSTRG.16585	1.16	872.767	9.55533	1.8264e-166	2.35669e-163	KCS2	PREDICTED: 3-ketoacyl-CoA synthase 2-like [Juglans regia]	Metabolism;Metabolism;Organismal Systems;Metabolism	Global and overview maps;Global and overview maps;Environmental adaptation;Lipid metabolism	ko01100//Metabolic pathways;ko01110//Biosynthesis of secondary metabolites;ko04626//Plant-pathogen interaction;ko00062//Fatty acid elongation	K15397;K15397;K15397;K15397	GO:0043231//intracellular membrane-bounded organelle	GO:0004312//fatty acid synthase activity	GO:0006631//fatty acid metabolic process;GO:0006950//response to stress;GO:0007275//multicellular organism development;GO:0009416//response to light stimulus;GO:0009699//phenylpropanoid biosynthetic process;GO:0009812//flavonoid metabolic process
MSTRG.16584	0.14	70.5733	8.97755	1.49788e-12	9.68334e-12	KCS20	PREDICTED: 3-ketoacyl-CoA synthase 2-like [Juglans regia]	Metabolism;Metabolism;Organismal Systems;Metabolism	Global and overview maps;Global and overview maps;Environmental adaptation;Lipid metabolism	ko01100//Metabolic pathways;ko01110//Biosynthesis of secondary metabolites;ko04626//Plant-pathogen interaction;ko00062//Fatty acid elongation	K15397;K15397;K15397;K15397	GO:0043231//intracellular membrane-bounded organelle	GO:0016740//transferase activity	GO:0008152//metabolic process
CIL1405S0014	0.0633333	1.64	4.69459	1.11786e-07	4.23809e-07	KCS20	PREDICTED: 3-ketoacyl-CoA synthase 2-like [Juglans regia]	Metabolism;Metabolism;Organismal Systems;Metabolism	Global and overview maps;Global and overview maps;Environmental adaptation;Lipid metabolism	ko01100//Metabolic pathways;ko01110//Biosynthesis of secondary metabolites;ko04626//Plant-pathogen interaction;ko00062//Fatty acid elongation	K15397;K15397;K15397;K15397	-	GO:0016746//transferase activity, transferring acyl groups	GO:0006631//fatty acid metabolic process
CIL1524S0019	3.82333	0.41	-3.22114	7.67883e-09	3.3565e-08	CUT1	PREDICTED: 3-ketoacyl-CoA synthase 6 [Juglans regia]	Metabolism;Metabolism;Organismal Systems;Metabolism	Global and overview maps;Global and overview maps;Environmental adaptation;Lipid metabolism	ko01100//Metabolic pathways;ko01110//Biosynthesis of secondary metabolites;ko04626//Plant-pathogen interaction;ko00062//Fatty acid elongation	K15397;K15397;K15397;K15397	-	GO:0016746//transferase activity, transferring acyl groups	GO:0006631//fatty acid metabolic process
CIL1286S0050	2.2	0.04	-5.78136	6.60492e-08	2.58537e-07	CUT1	PREDICTED: 3-ketoacyl-CoA synthase 6-like [Juglans regia]	Metabolism;Metabolism;Organismal Systems;Metabolism	Global and overview maps;Global and overview maps;Environmental adaptation;Lipid metabolism	ko01100//Metabolic pathways;ko01110//Biosynthesis of secondary metabolites;ko04626//Plant-pathogen interaction;ko00062//Fatty acid elongation	K15397;K15397;K15397;K15397	-	GO:0016746//transferase activity, transferring acyl groups	GO:0006631//fatty acid metabolic process
CIL0275S0005	0.25	0.001	-7.96578	0.0275864	0.0447862	KCS7	PREDICTED: 3-ketoacyl-CoA synthase 7 [Juglans regia]	Metabolism;Metabolism;Organismal Systems;Metabolism	Global and overview maps;Global and overview maps;Environmental adaptation;Lipid metabolism	ko01100//Metabolic pathways;ko01110//Biosynthesis of secondary metabolites;ko04626//Plant-pathogen interaction;ko00062//Fatty acid elongation	K15397;K15397;K15397;K15397	-	GO:0016746//transferase activity, transferring acyl groups	GO:0006631//fatty acid metabolic process
CIL1549S0034	40.8733	98.47	1.26852	5.16033e-16	4.62084e-15	PED1	PREDICTED: 3-ketoacyl-CoA thiolase 2, peroxisomal [Juglans regia]	Metabolism;Metabolism;Cellular Processes;Metabolism;Metabolism;Metabolism;Metabolism;Metabolism	Global and overview maps;Global and overview maps;Transport and catabolism;Global and overview maps;Lipid metabolism;Amino acid metabolism;Lipid metabolism;Lipid metabolism	ko01100//Metabolic pathways;ko01110//Biosynthesis of secondary metabolites;ko04146//Peroxisome;ko01212//Fatty acid metabolism;ko00592//alpha-Linolenic acid metabolism;ko00280//Valine, leucine and isoleucine degradation;ko00071//Fatty acid degradation;ko01040//Biosynthesis of unsaturated fatty acids	K07513;K07513;K07513;K07513;K07513;K07513;K07513;K07513	-	GO:0016746//transferase activity, transferring acyl groups	-
CIL0166S0003	128.603	23.23	-2.46887	1.95017e-05	5.45977e-05	PED1	PREDICTED: 3-ketoacyl-CoA thiolase 2, peroxisomal-like [Juglans regia]	Metabolism;Metabolism;Cellular Processes;Metabolism;Metabolism;Metabolism;Metabolism;Metabolism	Global and overview maps;Global and overview maps;Transport and catabolism;Global and overview maps;Lipid metabolism;Amino acid metabolism;Lipid metabolism;Lipid metabolism	ko01100//Metabolic pathways;ko01110//Biosynthesis of secondary metabolites;ko04146//Peroxisome;ko01212//Fatty acid metabolism;ko00592//alpha-Linolenic acid metabolism;ko00280//Valine, leucine and isoleucine degradation;ko00071//Fatty acid degradation;ko01040//Biosynthesis of unsaturated fatty acids	K07513;K07513;K07513;K07513;K07513;K07513;K07513;K07513	-	-	-
CIL0266S0002	0.74	0.001	-9.53138	2.15373e-05	5.99518e-05	AT4	PREDICTED: 3'-N-debenzoyl-2'-deoxytaxol N-benzoyltransferase-like [Juglans regia]	-	-	-	-	-	GO:0016413//O-acetyltransferase activity	-
CIL1393S0019	15.98	3.39	-2.23691	4.18724e-08	1.67926e-07	KAS1	PREDICTED: 3-oxoacyl-[acyl-carrier-protein] synthase I, chloroplastic [Juglans regia]	Metabolism;Metabolism;Metabolism;Metabolism	Global and overview maps;Global and overview maps;Lipid metabolism;Metabolism of cofactors and vitamins	ko01100//Metabolic pathways;ko01212//Fatty acid metabolism;ko00061//Fatty acid biosynthesis;ko00780//Biotin metabolism	K09458;K09458;K09458;K09458	-	GO:0016746//transferase activity, transferring acyl groups	GO:0006631//fatty acid metabolic process
CIL1354S0033	4.56667	0.68	-2.74753	1.95284e-06	6.31026e-06	KAS2	PREDICTED: 3-oxoacyl-[acyl-carrier-protein] synthase II, chloroplastic-like [Juglans regia]	Metabolism;Metabolism;Metabolism;Metabolism	Global and overview maps;Global and overview maps;Lipid metabolism;Metabolism of cofactors and vitamins	ko01100//Metabolic pathways;ko01212//Fatty acid metabolism;ko00061//Fatty acid biosynthesis;ko00780//Biotin metabolism	K09458;K09458;K09458;K09458	-	GO:0004312//fatty acid synthase activity	GO:0006631//fatty acid metabolic process
CIL1354S0030	5.01	0.916667	-2.45034	0.000741829	0.00162599	KAS2	PREDICTED: 3-oxoacyl-[acyl-carrier-protein] synthase II, chloroplastic-like, partial [Juglans regia]	Metabolism;Metabolism;Metabolism;Metabolism	Global and overview maps;Global and overview maps;Lipid metabolism;Metabolism of cofactors and vitamins	ko01100//Metabolic pathways;ko01212//Fatty acid metabolism;ko00061//Fatty acid biosynthesis;ko00780//Biotin metabolism	K09458;K09458;K09458;K09458	-	GO:0004312//fatty acid synthase activity	GO:0006631//fatty acid metabolic process
MSTRG.26015	17.61	203.527	3.53075	9.1827e-65	1.09206e-62	VEP1	PREDICTED: 3-oxo-Delta(4,5)-steroid 5-beta-reductase-like [Juglans regia]	-	-	-	-	GO:0044444//cytoplasmic part	GO:0016628//oxidoreductase activity, acting on the CH-CH group of donors, NAD or NADP as acceptor	GO:0003002//regionalization;GO:0006629//lipid metabolic process;GO:0006950//response to stress
MSTRG.946	2.88667	54.5767	4.24081	1.82068e-57	1.60912e-55	CYC2	PREDICTED: 3-oxo-Delta(4,5)-steroid 5-beta-reductase-like [Juglans regia]	-	-	-	-	GO:0044444//cytoplasmic part	GO:0016628//oxidoreductase activity, acting on the CH-CH group of donors, NAD or NADP as acceptor	GO:0003002//regionalization;GO:0006629//lipid metabolic process;GO:0006950//response to stress
MSTRG.26013	2.42667	30.3733	3.64576	1.82224e-34	5.28984e-33	VEP1	PREDICTED: 3-oxo-Delta(4,5)-steroid 5-beta-reductase-like [Juglans regia]	-	-	-	-	GO:0044444//cytoplasmic part	GO:0016628//oxidoreductase activity, acting on the CH-CH group of donors, NAD or NADP as acceptor	GO:0003002//regionalization;GO:0006629//lipid metabolic process;GO:0006950//response to stress
MSTRG.26014	4.39667	52.2167	3.57003	5.45696e-23	8.22111e-22	CYC1	PREDICTED: 3-oxo-Delta(4,5)-steroid 5-beta-reductase-like [Juglans regia]	-	-	-	-	GO:0044444//cytoplasmic part	GO:0035671//enone reductase activity;GO:0046983//protein dimerization activity	GO:0003002//regionalization;GO:0006950//response to stress;GO:0016098//monoterpenoid metabolic process
MSTRG.27112	2.51667	0.21	-3.58305	0.000113596	0.000283353	VEP1	PREDICTED: 3-oxo-Delta(4,5)-steroid 5-beta-reductase-like [Juglans regia]	-	-	-	-	GO:0044444//cytoplasmic part	GO:0035671//enone reductase activity;GO:0036094//small molecule binding;GO:0048037//cofactor binding	GO:0003002//regionalization;GO:0006629//lipid metabolic process;GO:0006950//response to stress
MSTRG.21047	6.81	1.21	-2.49265	0.000349188	0.000809658	VEP1	PREDICTED: 3-oxo-Delta(4,5)-steroid 5-beta-reductase-like [Juglans regia]	-	-	-	-	GO:0044444//cytoplasmic part	GO:0035671//enone reductase activity;GO:0036094//small molecule binding;GO:0048037//cofactor binding	GO:0003002//regionalization;GO:0006629//lipid metabolic process;GO:0006950//response to stress
MSTRG.21048	2.85	0.656667	-2.11773	0.00109389	0.00233018	VEP1	PREDICTED: 3-oxo-Delta(4,5)-steroid 5-beta-reductase-like [Juglans regia]	-	-	-	-	GO:0044444//cytoplasmic part	GO:0016628//oxidoreductase activity, acting on the CH-CH group of donors, NAD or NADP as acceptor;GO:0046983//protein dimerization activity	GO:0003002//regionalization;GO:0006950//response to stress;GO:0016098//monoterpenoid metabolic process
CIL1520S0048	182.003	70.34	-1.37155	0.00544746	0.0102116	RPS24A	PREDICTED: 40S ribosomal protein S24-1-like [Juglans regia]	Genetic Information Processing	Translation	ko03010//Ribosome	K02974	-	-	-
CIL0134S0027	0.916667	0.001	-9.84025	0.000262805	0.000621043	RPS4A	PREDICTED: 40S ribosomal protein S4-1 [Juglans regia]	Genetic Information Processing	Translation	ko03010//Ribosome	K02987	GO:0030529//intracellular ribonucleoprotein complex	GO:0003723//RNA binding;GO:0005198//structural molecule activity	GO:0010467//gene expression
CIL0409S0005	50.6167	20.0733	-1.33433	0.000184536	0.000446746	RPS6B	PREDICTED: 40S ribosomal protein S6-like [Juglans regia]	Genetic Information Processing	Translation	ko03010//Ribosome	K02991	-	-	-
CIL1445S0010	50.8167	4.52667	-3.48878	3.1043e-12	1.94119e-11	4CL1	PREDICTED: 4-coumarate--CoA ligase 1-like [Juglans regia]	Metabolism;Metabolism;Metabolism;Metabolism;Metabolism	Global and overview maps;Global and overview maps;Biosynthesis of other secondary metabolites;Amino acid metabolism;Metabolism of cofactors and vitamins	ko01100//Metabolic pathways;ko01110//Biosynthesis of secondary metabolites;ko00940//Phenylpropanoid biosynthesis;ko00360//Phenylalanine metabolism;ko00130//Ubiquinone and other terpenoid-quinone biosynthesis	K01904;K01904;K01904;K01904;K01904	-	GO:0016405//CoA-ligase activity	-
CIL0320S0003	41.1367	12.7533	-1.68955	0.000456239	0.00103637	4CLL5	PREDICTED: 4-coumarate--CoA ligase-like 5 [Juglans regia]	Metabolism;Metabolism;Metabolism	Global and overview maps;Global and overview maps;Lipid metabolism	ko01100//Metabolic pathways;ko01110//Biosynthesis of secondary metabolites;ko00592//alpha-Linolenic acid metabolism	K10526;K10526;K10526	GO:0042579//microbody	GO:0016703//oxidoreductase activity, acting on single donors with incorporation of molecular oxygen, incorporation of one atom of oxygen (internal monooxygenases or internal mixed function oxidases);GO:0032550//purine ribonucleoside binding	GO:0001101//response to acid chemical;GO:0009694//jasmonic acid metabolic process;GO:0010243//response to organonitrogen compound;GO:0051707//response to other organism
CIL1416S0026	19.6033	1.27	-3.9482	2.1169e-27	4.24483e-26	DAPB2	PREDICTED: 4-hydroxy-tetrahydrodipicolinate reductase 2, chloroplastic-like [Juglans regia]	Metabolism;Metabolism;Metabolism;Metabolism;Metabolism	Global and overview maps;Global and overview maps;Global and overview maps;Amino acid metabolism;Biosynthesis of other secondary metabolites	ko01100//Metabolic pathways;ko01110//Biosynthesis of secondary metabolites;ko01230//Biosynthesis of amino acids;ko00300//Lysine biosynthesis;ko00261//Monobactam biosynthesis	K00215;K00215;K00215;K00215;K00215	GO:0009536//plastid	GO:0043168//anion binding	GO:0009085//lysine biosynthetic process
CIL1447S0013	9.12667	1.89	-2.2717	5.71205e-05	0.000149656	RPL15	PREDICTED: 50S ribosomal protein L15, chloroplastic [Juglans regia]	Genetic Information Processing	Translation	ko03010//Ribosome	K02876	-	-	-
CIL1317S0023	6.29	1.77	-1.82931	0.000344162	0.000798931	rplR	PREDICTED: 50S ribosomal protein L18-like [Citrus sinensis]	-	-	-	-	-	-	-
CIL0203S0011	44.4267	19.0867	-1.21886	0.00381773	0.00736905	RPL21	PREDICTED: 50S ribosomal protein L21, chloroplastic-like [Juglans regia]	Genetic Information Processing	Translation	ko03010//Ribosome	K02888	GO:0030529//intracellular ribonucleoprotein complex;GO:0044435//plastid part	-	GO:0006351//transcription, DNA-templated;GO:0009658//chloroplast organization;GO:0031323//regulation of cellular metabolic process;GO:0044085//cellular component biogenesis;GO:0044267//cellular protein metabolic process;GO:0044763//single-organism cellular process;GO:0044767//single-organism developmental process;GO:0060255//regulation of macromolecule metabolic process;GO:0080090//regulation of …
CIL1486S0003	5.59	0.826667	-2.75747	0.000180327	0.000437625	RPL27	PREDICTED: 50S ribosomal protein L27, chloroplastic [Juglans regia]	Genetic Information Processing	Translation	ko03010//Ribosome	K02899	GO:0030529//intracellular ribonucleoprotein complex	-	GO:0010467//gene expression
CIL0203S0003	16.6833	2.93333	-2.50779	9.40778e-13	6.20938e-12	RPL31	PREDICTED: 50S ribosomal protein L31, chloroplastic [Juglans regia]	Genetic Information Processing	Translation	ko03010//Ribosome	K02909	GO:0009526//plastid envelope;GO:0009532//plastid stroma;GO:0030529//intracellular ribonucleoprotein complex	GO:0003723//RNA binding;GO:0005198//structural molecule activity	GO:0006090//pyruvate metabolic process;GO:0006739//NADP metabolic process;GO:0006779//porphyrin-containing compound biosynthetic process;GO:0009658//chloroplast organization;GO:0009668//plastid membrane organization;GO:0009767//photosynthetic electron transport chain;GO:0010467//gene expression;GO:0016072//rRNA metabolic process;GO:0043623//cellular protein complex assembly
CIL1526S0037	6.75	0.973333	-2.79388	4.08704e-10	2.06569e-09	RPL3B	PREDICTED: 50S ribosomal protein L3-2, chloroplastic-like [Juglans regia]	Genetic Information Processing	Translation	ko03010//Ribosome	K02906	GO:0009536//plastid;GO:0030529//intracellular ribonucleoprotein complex	GO:0003723//RNA binding;GO:0005198//structural molecule activity	GO:0010467//gene expression
CIL1282S0033	16.8267	7.32	-1.20083	0.00845113	0.015257	RPL35	PREDICTED: 50S ribosomal protein L35, chloroplastic-like [Juglans regia]	Genetic Information Processing	Translation	ko03010//Ribosome	K02916	GO:0030529//intracellular ribonucleoprotein complex	-	-
CIL1344S0019	13.7367	5.79667	-1.24474	0.00413192	0.00792511	XRN4	PREDICTED: 5'-3' exoribonuclease 3 [Vitis vinifera]	Genetic Information Processing;Genetic Information Processing	Folding, sorting and degradation;Translation	ko03018//RNA degradation;ko03008//Ribosome biogenesis in eukaryotes	K12619;K12619	-	-	-
CIL1520S0044	9.13	19.3433	1.08315	1.04826e-12	6.88883e-12	XRN4	PREDICTED: 5'-3' exoribonuclease 4-like isoform X2 [Juglans regia]	Environmental Information Processing	Signal transduction	ko04016//MAPK signaling pathway - plant	K20553	GO:0043231//intracellular membrane-bounded organelle;GO:0044444//cytoplasmic part	GO:0008409//5'-3' exonuclease activity;GO:0046914//transition metal ion binding	GO:0000160//phosphorelay signal transduction system;GO:0000904//cell morphogenesis involved in differentiation;GO:0000956//nuclear-transcribed mRNA catabolic process;GO:0006305//DNA alkylation;GO:0006355//regulation of transcription, DNA-templated;GO:0006486//protein glycosylation;GO:0007015//actin filament organization;GO:0009606//tropism;GO:0009933//meristem structural organization;GO:0010586//…
CIL1424S0040	12.3633	4.83667	-1.35398	0.023111	0.0381199	mrpl51	PREDICTED: 54S ribosomal protein L51, mitochondrial [Theobroma cacao]	-	-	-	-	-	-	-
CIL1375S0038	5.47667	1.49667	-1.87155	0.00566616	0.0105837	5FCL	PREDICTED: 5-formyltetrahydrofolate cyclo-ligase, mitochondrial-like [Juglans regia]	Metabolism;Metabolism	Global and overview maps;Metabolism of cofactors and vitamins	ko01100//Metabolic pathways;ko00670//One carbon pool by folate	K01934;K01934	-	-	-
CIL0324S0013	2.47333	0.7	-1.82103	0.0149069	0.0255939	COG0212	PREDICTED: 5-formyltetrahydrofolate cyclo-ligase-like protein COG0212 [Juglans regia]	Metabolism;Metabolism	Global and overview maps;Metabolism of cofactors and vitamins	ko01100//Metabolic pathways;ko00670//One carbon pool by folate	K01934;K01934	GO:0009536//plastid	GO:0016882//cyclo-ligase activity;GO:0032550//purine ribonucleoside binding	GO:0005982//starch metabolic process;GO:0005984//disaccharide metabolic process;GO:0006760//folic acid-containing compound metabolic process;GO:0016109//tetraterpenoid biosynthetic process
CIL0027S0004	43.6567	1.46	-4.90216	4.39566e-19	4.9929e-18	METE	PREDICTED: 5-methyltetrahydropteroyltriglutamate--homocysteine methyltransferase-like [Juglans regia]	Metabolism;Metabolism;Metabolism;Metabolism;Metabolism	Global and overview maps;Global and overview maps;Global and overview maps;Amino acid metabolism;Metabolism of other amino acids	ko01100//Metabolic pathways;ko01110//Biosynthesis of secondary metabolites;ko01230//Biosynthesis of amino acids;ko00270//Cysteine and methionine metabolism;ko00450//Selenocompound metabolism	K00549;K00549;K00549;K00549;K00549	GO:0009536//plastid	GO:0008172//S-methyltransferase activity;GO:0046914//transition metal ion binding	GO:0000097//sulfur amino acid biosynthetic process
CIL1339S0017	9.45667	1.47333	-2.68225	1.35506e-14	1.06583e-13	Nt5dc3	PREDICTED: 5'-nucleotidase domain-containing protein 4-like [Juglans regia]	-	-	-	-	-	GO:0008252//nucleotidase activity	GO:0006796//phosphate-containing compound metabolic process
MSTRG.12668	102.43	44.86	-1.19114	0.00429109	0.00820177	RPL10A	PREDICTED: 60S ribosomal protein L10a [Juglans regia]	Genetic Information Processing	Translation	ko03010//Ribosome	K02865	GO:0009536//plastid;GO:0015934//large ribosomal subunit	GO:0005198//structural molecule activity	GO:0003002//regionalization;GO:0009451//RNA modification;GO:0010467//gene expression;GO:0016072//rRNA metabolic process
CIL1393S0012	121.007	58.6067	-1.04595	0.00587139	0.0109279	RPL18A	PREDICTED: 60S ribosomal protein L18a-like [Juglans regia]	Genetic Information Processing	Translation	ko03010//Ribosome	K02882	GO:0030529//intracellular ribonucleoprotein complex	-	GO:0010467//gene expression
CIL0311S0014	5.97	12.63	1.08105	1.91511e-18	2.08273e-17	--	PREDICTED: 60S ribosomal protein L18a-like protein isoform X1 [Nelumbo nucifera]	-	-	-	-	-	-	-
CIL1465S0021	149.003	53.3633	-1.48142	0.000547613	0.00122894	RPL31	PREDICTED: 60S ribosomal protein L31-like [Juglans regia]	Genetic Information Processing	Translation	ko03010//Ribosome	K02910	GO:0030529//intracellular ribonucleoprotein complex	-	GO:0010467//gene expression
CIL1371S0025	46.6767	13.2533	-1.81635	0.000131311	0.000325092	ARP2	PREDICTED: 60S ribosomal protein L3-2 [Juglans regia]	Genetic Information Processing	Translation	ko03010//Ribosome	K02925	GO:0030529//intracellular ribonucleoprotein complex	-	GO:0010467//gene expression
CIL1456S0044	93.53	15.93	-2.55368	1.96068e-10	1.02241e-09	RPL38A	PREDICTED: 60S ribosomal protein L38-like [Juglans regia]	Genetic Information Processing	Translation	ko03010//Ribosome	K02923	GO:0030529//intracellular ribonucleoprotein complex	-	GO:0010467//gene expression
CIL1295S0006	22.1667	7.86333	-1.49518	0.00728547	0.0133099	RPL9	PREDICTED: 60S ribosomal protein L9-like [Juglans regia]	Genetic Information Processing	Translation	ko03010//Ribosome	K02940	GO:0030529//intracellular ribonucleoprotein complex	GO:0003723//RNA binding	GO:0010467//gene expression
CIL1417S0020	145.18	1.21	-6.90669	1.90757e-26	3.62508e-25	MAP65-1	PREDICTED: 65-kDa microtubule-associated protein 1-like [Juglans regia]	-	-	-	-	-	GO:0015631//tubulin binding	GO:0022402//cell cycle process
CIL1271S0043	12.5333	0.286667	-5.45025	4.30405e-49	2.56524e-47	MAP65-3	PREDICTED: 65-kDa microtubule-associated protein 3-like [Juglans regia]	-	-	-	-	-	GO:0015631//tubulin binding	GO:0022402//cell cycle process
CIL1562S0013	11.2667	0.54	-4.38296	2.43914e-19	2.83545e-18	MAP65-3	PREDICTED: 65-kDa microtubule-associated protein 3-like [Juglans regia]	-	-	-	-	-	GO:0015631//tubulin binding	GO:0022402//cell cycle process
CIL1505S0053	5.85333	0.001	-12.515	1.30861e-12	8.50659e-12	MAP65-5	PREDICTED: 65-kDa microtubule-associated protein 5-like [Juglans regia]	-	-	-	-	-	GO:0015631//tubulin binding	GO:0022402//cell cycle process
CIL1486S0041	26.66	0.0866667	-8.26498	2.26322e-33	6.2003e-32	MAP65-8	PREDICTED: 65-kDa microtubule-associated protein 8-like [Juglans regia]	-	-	-	-	GO:0005819//spindle;GO:0043231//intracellular membrane-bounded organelle	GO:0015631//tubulin binding	GO:0000280//nuclear division;GO:0022402//cell cycle process
CIL1458S0008	2.11667	0.0933333	-4.50326	2.3668e-06	7.55098e-06	MAP65-8	PREDICTED: 65-kDa microtubule-associated protein 8-like isoform X1 [Juglans regia]	-	-	-	-	GO:0005819//spindle;GO:0043231//intracellular membrane-bounded organelle	GO:0015631//tubulin binding	GO:0000280//nuclear division;GO:0022402//cell cycle process
CIL0135S0020	10.5033	0.453333	-4.53413	9.00472e-15	7.23264e-14	FKFBP	PREDICTED: 6-phosphofructo-2-kinase/fructose-2,6-bisphosphatase-like isoform X1 [Juglans regia]	Metabolism	Carbohydrate metabolism	ko00051//Fructose and mannose metabolism	K01103	GO:0016020//membrane;GO:0044444//cytoplasmic part	GO:0008443//phosphofructokinase activity;GO:0030247//polysaccharide binding;GO:0032550//purine ribonucleoside binding;GO:0050308//sugar-phosphatase activity	GO:0015976//carbon utilization;GO:0016310//phosphorylation;GO:0019318//hexose metabolic process;GO:0019321//pentose metabolic process
CIL1459S0025	54.83	209.04	1.93074	4.72357e-63	5.16531e-61	FKBP65	PREDICTED: 70 kDa peptidyl-prolyl isomerase-like isoform X1 [Juglans regia]	-	-	-	-	-	GO:0003824//catalytic activity	-
MSTRG.3673	9.32	0.456667	-4.35112	3.04407e-29	6.69722e-28	UGT85A23	PREDICTED: 7-deoxyloganetin glucosyltransferase-like [Juglans regia]	Metabolism;Metabolism	Global and overview maps;Global and overview maps	ko01100//Metabolic pathways;ko01110//Biosynthesis of secondary metabolites	K21374;K21374	-	GO:0035251//UDP-glucosyltransferase activity	-
MSTRG.22350	7.99	41.85	2.38896	1.43038e-14	1.122e-13	UGT85K5	PREDICTED: 7-deoxyloganetin glucosyltransferase-like [Juglans regia]	Metabolism;Metabolism	Global and overview maps;Global and overview maps	ko01100//Metabolic pathways;ko01110//Biosynthesis of secondary metabolites	K21374;K21374	-	GO:0035251//UDP-glucosyltransferase activity	-
MSTRG.22346	0.656667	3.19333	2.28183	0.00598987	0.0111321	UGT85K4	PREDICTED: 7-deoxyloganetin glucosyltransferase-like [Juglans regia]	Metabolism;Metabolism	Global and overview maps;Global and overview maps	ko01100//Metabolic pathways;ko01110//Biosynthesis of secondary metabolites	K21374;K21374	-	GO:0035251//UDP-glucosyltransferase activity	-
MSTRG.22353	0.743333	27.35	5.20139	1.2056e-64	1.41422e-62	UGT85K4	PREDICTED: 7-deoxyloganetin glucosyltransferase-like isoform X2 [Juglans regia]	Metabolism;Metabolism	Global and overview maps;Global and overview maps	ko01100//Metabolic pathways;ko01110//Biosynthesis of secondary metabolites	K21374;K21374	-	GO:0035251//UDP-glucosyltransferase activity	GO:0016099//monoterpenoid biosynthetic process
MSTRG.23260	7.67333	94.7433	3.6261	4.20315e-36	1.32605e-34	UGT85A24	PREDICTED: 7-deoxyloganetin glucosyltransferase-like, partial [Juglans regia]	Metabolism;Metabolism	Global and overview maps;Global and overview maps	ko01100//Metabolic pathways;ko01110//Biosynthesis of secondary metabolites	K21374;K21374	-	GO:0035251//UDP-glucosyltransferase activity	-
MSTRG.23259	0.176667	3.59333	4.34622	1.43113e-18	1.57363e-17	UGT85A24	PREDICTED: 7-deoxyloganetin glucosyltransferase-like, partial [Juglans regia]	Metabolism;Metabolism	Global and overview maps;Global and overview maps	ko01100//Metabolic pathways;ko01110//Biosynthesis of secondary metabolites	K21374;K21374	-	GO:0035251//UDP-glucosyltransferase activity	-
CIL1264S0036	8.65667	29.6	1.77371	7.27868e-19	8.16345e-18	BIOF	PREDICTED: 8-amino-7-oxononanoate synthase [Juglans regia]	Metabolism;Metabolism	Global and overview maps;Metabolism of cofactors and vitamins	ko01100//Metabolic pathways;ko00780//Biotin metabolism	K00652;K00652	-	-	-
CIL1596S0018	20.68	0.0133333	-10.599	1.12908e-16	1.06051e-15	AATP1	PREDICTED: AAA-ATPase ASD, mitochondrial-like [Juglans regia]	-	-	-	-	-	GO:0032550//purine ribonucleoside binding	-
CIL1467S0006	0.001	0.483333	8.91687	7.91727e-05	0.00020274	At3g28540	PREDICTED: AAA-ATPase ASD, mitochondrial-like [Juglans regia]	-	-	-	-	-	-	-
CIL1295S0052	3.75333	0.606667	-2.6292	3.45065e-06	1.0742e-05	At2g18193	PREDICTED: AAA-ATPase At2g18193-like isoform X1 [Juglans regia]	-	-	-	-	-	GO:0032550//purine ribonucleoside binding	-
CIL1298S0046	0.16	2.87333	4.16658	0.00284055	0.00562249	At2g46620	PREDICTED: AAA-ATPase At2g46620-like [Juglans regia]	-	-	-	-	-	GO:0003824//catalytic activity;GO:0032550//purine ribonucleoside binding	-
CIL1596S0016	0.133333	0.93	2.80219	1.01019e-07	3.85138e-07	At3g28510	PREDICTED: AAA-ATPase At3g28580-like [Juglans regia]	-	-	-	-	-	GO:0032550//purine ribonucleoside binding	-
CIL1467S0011	0.456667	0.001	-8.835	0.0203044	0.0338585	At3g28580	PREDICTED: AAA-ATPase At3g28580-like [Juglans regia]	-	-	-	-	-	-	-
CIL1569S0020	1.65333	0.1	-4.04731	2.171e-08	8.99166e-08	ABCA2	PREDICTED: ABC transporter A family member 2-like isoform X1 [Juglans regia]	-	-	-	-	GO:0031224//intrinsic component of membrane	GO:0017111//nucleoside-triphosphatase activity;GO:0032550//purine ribonucleoside binding	GO:0051234//establishment of localization
CIL1313S0008	59.9367	10.4133	-2.52501	1.16248e-23	1.83488e-22	ABCB1	PREDICTED: ABC transporter B family member 1 [Juglans regia]	Environmental Information Processing	Membrane transport	ko02010//ABC transporters	K05658	GO:0031224//intrinsic component of membrane	GO:0019829//cation-transporting ATPase activity;GO:0032550//purine ribonucleoside binding	GO:0006826//iron ion transport;GO:0015893//drug transport;GO:0044763//single-organism cellular process
CIL1325S0069	0.54	0.116667	-2.21057	0.0135656	0.0235021	ABCB15	PREDICTED: ABC transporter B family member 15-like [Juglans regia]	Environmental Information Processing	Membrane transport	ko02010//ABC transporters	K05658	GO:0031224//intrinsic component of membrane	GO:0015405//P-P-bond-hydrolysis-driven transmembrane transporter activity;GO:0017111//nucleoside-triphosphatase activity;GO:0032550//purine ribonucleoside binding	GO:0044763//single-organism cellular process;GO:0051234//establishment of localization
CIL1295S0069	0.186667	0.001	-7.54432	0.00220259	0.00445054	ABCB19	PREDICTED: ABC transporter B family member 19-like [Juglans regia]	Environmental Information Processing	Membrane transport	ko02010//ABC transporters	K05658	-	GO:0042626//ATPase activity, coupled to transmembrane movement of substances	GO:0044763//single-organism cellular process;GO:0044765//single-organism transport
CIL0266S0007	1.52	8.03667	2.40253	6.80714e-05	0.000176077	ABCB11	PREDICTED: ABC transporter B family member 21-like [Juglans regia]	Environmental Information Processing	Membrane transport	ko02010//ABC transporters	K05658	GO:0031224//intrinsic component of membrane	GO:0015405//P-P-bond-hydrolysis-driven transmembrane transporter activity;GO:0017111//nucleoside-triphosphatase activity;GO:0032550//purine ribonucleoside binding	GO:0044763//single-organism cellular process;GO:0051234//establishment of localization
CIL0596S0001	1.29	0.143333	-3.16993	0.0107199	0.0189771	ABCB25	PREDICTED: ABC transporter B family member 25, mitochondrial-like [Juglans regia]	Environmental Information Processing	Membrane transport	ko02010//ABC transporters	K05663	GO:0031224//intrinsic component of membrane	GO:0032550//purine ribonucleoside binding;GO:0042626//ATPase activity, coupled to transmembrane movement of substances	GO:0015893//drug transport;GO:0044763//single-organism cellular process
CIL0285S0005	0.316667	34.4	6.7633	1.24971e-59	1.21703e-57	ABCC4	PREDICTED: ABC transporter C family member 14-like [Juglans regia]	Environmental Information Processing	Membrane transport	ko02010//ABC transporters	K05666	GO:0031224//intrinsic component of membrane	GO:0015405//P-P-bond-hydrolysis-driven transmembrane transporter activity;GO:0016628//oxidoreductase activity, acting on the CH-CH group of donors, NAD or NADP as acceptor;GO:0017111//nucleoside-triphosphatase activity;GO:0032550//purine ribonucleoside binding	GO:0044710//single-organism metabolic process;GO:0044763//single-organism cellular process;GO:0051234//establishment of localization
MSTRG.5966	37.5267	6.89667	-2.44395	5.83728e-08	2.29989e-07	ABCC3	PREDICTED: ABC transporter C family member 3 [Juglans regia]	Environmental Information Processing	Membrane transport	ko02010//ABC transporters	K05666	GO:0031224//intrinsic component of membrane	GO:0015405//P-P-bond-hydrolysis-driven transmembrane transporter activity;GO:0016628//oxidoreductase activity, acting on the CH-CH group of donors, NAD or NADP as acceptor;GO:0017111//nucleoside-triphosphatase activity;GO:0032550//purine ribonucleoside binding	GO:0044710//single-organism metabolic process;GO:0044763//single-organism cellular process;GO:0051234//establishment of localization
MSTRG.12011	2.25	0.323333	-2.79883	5.58319e-07	1.94081e-06	ABCC3	PREDICTED: ABC transporter C family member 3 [Juglans regia]	Environmental Information Processing	Membrane transport	ko02010//ABC transporters	K05666	GO:0031224//intrinsic component of membrane	GO:0032550//purine ribonucleoside binding;GO:0042626//ATPase activity, coupled to transmembrane movement of substances	GO:0015893//drug transport;GO:0042886//amide transport;GO:0044763//single-organism cellular process
MSTRG.5967	2.47667	0.103333	-4.58302	3.24744e-05	8.80414e-05	ABCC3	PREDICTED: ABC transporter C family member 3 [Juglans regia]	Environmental Information Processing	Membrane transport	ko02010//ABC transporters	K05666	GO:0031224//intrinsic component of membrane	GO:0015405//P-P-bond-hydrolysis-driven transmembrane transporter activity;GO:0016628//oxidoreductase activity, acting on the CH-CH group of donors, NAD or NADP as acceptor;GO:0017111//nucleoside-triphosphatase activity;GO:0032550//purine ribonucleoside binding	GO:0044710//single-organism metabolic process;GO:0044763//single-organism cellular process;GO:0051234//establishment of localization
MSTRG.11660	6.65	0.616667	-3.43079	0.00111478	0.00237115	ABCC3	PREDICTED: ABC transporter C family member 3 [Juglans regia]	Environmental Information Processing	Membrane transport	ko02010//ABC transporters	K05666	GO:0031224//intrinsic component of membrane	GO:0015405//P-P-bond-hydrolysis-driven transmembrane transporter activity;GO:0016628//oxidoreductase activity, acting on the CH-CH group of donors, NAD or NADP as acceptor;GO:0017111//nucleoside-triphosphatase activity;GO:0032550//purine ribonucleoside binding	GO:0044710//single-organism metabolic process;GO:0044763//single-organism cellular process;GO:0051234//establishment of localization
MSTRG.12010	2.36	0.266667	-3.14568	0.0016181	0.00334415	ABCC3	PREDICTED: ABC transporter C family member 3 [Juglans regia]	Environmental Information Processing	Membrane transport	ko02010//ABC transporters	K05666	GO:0031224//intrinsic component of membrane	GO:0015405//P-P-bond-hydrolysis-driven transmembrane transporter activity;GO:0016628//oxidoreductase activity, acting on the CH-CH group of donors, NAD or NADP as acceptor;GO:0017111//nucleoside-triphosphatase activity;GO:0032550//purine ribonucleoside binding	GO:0044710//single-organism metabolic process;GO:0044763//single-organism cellular process;GO:0051234//establishment of localization
CIL1293S0062	0.17	1.39667	3.03838	0.0218071	0.0361471	ABCC5	PREDICTED: ABC transporter C family member 5 isoform X1 [Juglans regia]	-	-	-	-	GO:0005773//vacuole;GO:0016020//membrane	GO:0016491//oxidoreductase activity;GO:0042626//ATPase activity, coupled to transmembrane movement of substances	GO:0008152//metabolic process;GO:0044763//single-organism cellular process;GO:0044765//single-organism transport;GO:0050896//response to stimulus;GO:0065007//biological regulation
CIL1293S0063	6.8	27.0933	1.99433	1.55149e-15	1.34e-14	ABCC5	PREDICTED: ABC transporter C family member 5 isoform X2 [Juglans regia]	-	-	-	-	GO:0005773//vacuole;GO:0031090//organelle membrane;GO:0031224//intrinsic component of membrane	GO:0004888//transmembrane signaling receptor activity;GO:0032550//purine ribonucleoside binding;GO:0042626//ATPase activity, coupled to transmembrane movement of substances	GO:0006865//amino acid transport;GO:0006875//cellular metal ion homeostasis;GO:0006970//response to osmotic stress;GO:0007017//microtubule-based process;GO:0015893//drug transport;GO:0016482//cytoplasmic transport;GO:0050794//regulation of cellular process;GO:1902410//mitotic cytokinetic process
CIL1378S0027	0.0533333	0.27	2.33985	0.00479098	0.00907455	ABCG14	PREDICTED: ABC transporter G family member 14-like [Juglans regia]	-	-	-	-	GO:0031224//intrinsic component of membrane	GO:0015604//organic phosphonate transmembrane transporter activity;GO:0017111//nucleoside-triphosphatase activity;GO:0032550//purine ribonucleoside binding	GO:0044765//single-organism transport
CIL1543S0021	0.236667	1.71667	2.85868	2.35572e-05	6.51457e-05	ABCG21	PREDICTED: ABC transporter G family member 21 [Juglans regia]	-	-	-	-	GO:0031224//intrinsic component of membrane	GO:0015604//organic phosphonate transmembrane transporter activity;GO:0017111//nucleoside-triphosphatase activity;GO:0032550//purine ribonucleoside binding	GO:0044765//single-organism transport
CIL0041S0004	0.2	0.001	-7.64386	0.000456588	0.00103689	ABCG28	PREDICTED: ABC transporter G family member 28-like [Juglans regia]	-	-	-	-	GO:0031224//intrinsic component of membrane	GO:0017111//nucleoside-triphosphatase activity;GO:0032550//purine ribonucleoside binding	GO:0051234//establishment of localization
CIL0552S0002	6.71333	0.133333	-5.65392	3.96142e-25	6.88897e-24	ABCG3	PREDICTED: ABC transporter G family member 3 [Juglans regia]	-	-	-	-	GO:0031224//intrinsic component of membrane	GO:0005363//maltose transmembrane transporter activity;GO:0017111//nucleoside-triphosphatase activity;GO:0032550//purine ribonucleoside binding	GO:0015766//disaccharide transport
CIL1619S0008	2.03667	0.0333333	-5.9331	8.15225e-06	2.40495e-05	ABCG31	PREDICTED: ABC transporter G family member 32 isoform X1 [Juglans regia]	-	-	-	-	GO:0031224//intrinsic component of membrane	GO:0017111//nucleoside-triphosphatase activity;GO:0032550//purine ribonucleoside binding	GO:0007275//multicellular organism development;GO:0015893//drug transport
CIL1492S0033	16.2367	0.001	-13.987	1.28304e-18	1.41622e-17	ABCG5	PREDICTED: ABC transporter G family member 5-like [Juglans regia]	Environmental Information Processing	Membrane transport	ko02010//ABC transporters	K05681	GO:0031224//intrinsic component of membrane	GO:0017111//nucleoside-triphosphatase activity;GO:0032550//purine ribonucleoside binding	GO:0009886//post-embryonic morphogenesis;GO:0051234//establishment of localization
CIL0437S0001	8.8	2.65667	-1.72789	2.79938e-06	8.83713e-06	ABCG7	PREDICTED: ABC transporter G family member 7 [Juglans regia]	-	-	-	-	-	GO:0017111//nucleoside-triphosphatase activity;GO:0032550//purine ribonucleoside binding	-
CIL1444S0033	0.0133333	5.37667	8.65553	3.33876e-13	2.31435e-12	ABCG9	PREDICTED: ABC transporter G family member 9 [Juglans regia]	-	-	-	-	-	-	-
CIL1320S0030	4.69333	0.0833333	-5.81558	1.53584e-26	2.93162e-25	Aspm	PREDICTED: abnormal spindle-like microcephaly-associated protein isoform X1 [Juglans regia]	-	-	-	-	-	-	GO:0006259//DNA metabolic process;GO:0006342//chromatin silencing;GO:0016569//covalent chromatin modification;GO:0022402//cell cycle process;GO:0031047//gene silencing by RNA;GO:0043414//macromolecule methylation;GO:0048449//floral organ formation;GO:1902589//single-organism organelle organization
CIL1371S0054	3.69333	0.146667	-4.65431	3.85622e-09	1.74469e-08	AOG	PREDICTED: abscisate beta-glucosyltransferase-like isoform X1 [Juglans regia]	Metabolism;Metabolism;Metabolism	Global and overview maps;Global and overview maps;Metabolism of terpenoids and polyketides	ko01100//Metabolic pathways;ko01110//Biosynthesis of secondary metabolites;ko00906//Carotenoid biosynthesis	K14595;K14595;K14595	-	GO:0016758//transferase activity, transferring hexosyl groups	-
CIL1371S0041	1.34667	0.236667	-2.50846	9.81097e-05	0.000247644	CYP707A4	PREDICTED: abscisic acid 8'-hydroxylase 4-like [Juglans regia]	Metabolism	Metabolism of terpenoids and polyketides	ko00906//Carotenoid biosynthesis	K09843	GO:0031224//intrinsic component of membrane	GO:0016709//oxidoreductase activity, acting on paired donors, with incorporation or reduction of molecular oxygen, NAD(P)H as one donor, and incorporation of one atom of oxygen;GO:0046906//tetrapyrrole binding;GO:0046914//transition metal ion binding	GO:0009687//abscisic acid metabolic process;GO:0050896//response to stimulus
CIL1507S0007	0.001	0.24	7.90689	0.00223346	0.00450726	CYP707A7	PREDICTED: abscisic acid 8'-hydroxylase 4-like [Juglans regia]	Metabolism	Metabolism of terpenoids and polyketides	ko00906//Carotenoid biosynthesis	K09843	-	GO:0016491//oxidoreductase activity;GO:0046906//tetrapyrrole binding;GO:0046914//transition metal ion binding	GO:0044710//single-organism metabolic process
CIL1308S0009	73.0967	19.0733	-1.93825	4.18213e-15	3.46813e-14	PYL9	PREDICTED: abscisic acid receptor PYL9-like [Juglans regia]	Environmental Information Processing;Environmental Information Processing	Signal transduction;Signal transduction	ko04075//Plant hormone signal transduction;ko04016//MAPK signaling pathway - plant	K14496;K14496	-	-	-
CIL1387S0048	13.99	5	-1.4844	0.000172312	0.000419435	DPBF3	PREDICTED: ABSCISIC ACID-INSENSITIVE 5-like protein 2 [Juglans regia]	Environmental Information Processing	Signal transduction	ko04075//Plant hormone signal transduction	K14432	-	GO:0003677//DNA binding	GO:0010468//regulation of gene expression
CIL0045S0005	11.8367	57.7767	2.28722	1.65891e-59	1.60343e-57	DPBF3	PREDICTED: ABSCISIC ACID-INSENSITIVE 5-like protein 5 [Juglans regia]	Environmental Information Processing	Signal transduction	ko04075//Plant hormone signal transduction	K14432	-	-	-
CIL1371S0045	16.28	2.55667	-2.67076	1.12696e-06	3.75636e-06	ABF2	PREDICTED: ABSCISIC ACID-INSENSITIVE 5-like protein 6 isoform X2 [Juglans regia]	Environmental Information Processing	Signal transduction	ko04075//Plant hormone signal transduction	K14432	-	-	-
CIL0324S0005	34.5267	2.36333	-3.86882	3.9937e-32	1.01843e-30	--	PREDICTED: abscisic stress-ripening protein 1-like [Juglans regia]	-	-	-	-	-	-	-
CIL1427S0033	1.51333	0.001	-10.5635	0.000237077	0.000563999	--	PREDICTED: acanthoscurrin-1-like [Juglans regia]	-	-	-	-	-	-	-
CIL1524S0009	0.27	2.29667	3.08851	2.03484e-05	5.68323e-05	At4g39670	PREDICTED: ACD11 homolog protein isoform X1 [Juglans regia]	-	-	-	-	-	-	-
CIL1367S0012	249.68	623.61	1.32056	4.42185e-13	3.02451e-12	AAE7	PREDICTED: acetate/butyrate--CoA ligase AAE7, peroxisomal [Juglans regia]	Metabolism;Metabolism;Metabolism;Metabolism;Metabolism;Metabolism	Global and overview maps;Global and overview maps;Global and overview maps;Carbohydrate metabolism;Carbohydrate metabolism;Carbohydrate metabolism	ko01100//Metabolic pathways;ko01110//Biosynthesis of secondary metabolites;ko01200//Carbon metabolism;ko00010//Glycolysis / Gluconeogenesis;ko00620//Pyruvate metabolism;ko00630//Glyoxylate and dicarboxylate metabolism	K01913;K01913;K01913;K01913;K01913;K01913	GO:0042579//microbody	GO:0016405//CoA-ligase activity;GO:0016878//acid-thiol ligase activity	GO:0044262//cellular carbohydrate metabolic process;GO:0046459//short-chain fatty acid metabolic process
CIL1264S0043	14.4367	1.34333	-3.42585	1.7772e-25	3.16305e-24	INV*DC4	PREDICTED: acid beta-fructofuranosidase-like [Juglans regia]	Metabolism;Metabolism;Metabolism	Global and overview maps;Carbohydrate metabolism;Carbohydrate metabolism	ko01100//Metabolic pathways;ko00500//Starch and sucrose metabolism;ko00052//Galactose metabolism	K01193;K01193;K01193	-	GO:0004564//beta-fructofuranosidase activity	GO:0044238//primary metabolic process
CIL1293S0039	24.2867	0.103333	-7.87671	9.84649e-31	2.35722e-29	APS1	PREDICTED: acid phosphatase 1 [Juglans regia]	-	-	-	-	-	GO:0003824//catalytic activity	GO:0006796//phosphate-containing compound metabolic process
CIL0260S0005	11.77	113.83	3.27369	1.32559e-26	2.5378e-25	SE2	PREDICTED: acidic endochitinase-like [Juglans regia]	Metabolism;Metabolism	Global and overview maps;Carbohydrate metabolism	ko01100//Metabolic pathways;ko00520//Amino sugar and nucleotide sugar metabolism	K01183;K01183	-	GO:0016787//hydrolase activity	GO:0044238//primary metabolic process
CIL1417S0071	18.91	4.39667	-2.10467	0.00120865	0.00255752	ACO3	PREDICTED: aconitate hydratase, cytoplasmic [Citrus sinensis]	Metabolism;Metabolism;Metabolism;Metabolism;Metabolism;Metabolism;Metabolism	Global and overview maps;Global and overview maps;Global and overview maps;Global and overview maps;Carbohydrate metabolism;Carbohydrate metabolism;Global and overview maps	ko01100//Metabolic pathways;ko01110//Biosynthesis of secondary metabolites;ko01200//Carbon metabolism;ko01230//Biosynthesis of amino acids;ko00630//Glyoxylate and dicarboxylate metabolism;ko00020//Citrate cycle (TCA cycle);ko01210//2-Oxocarboxylic acid metabolism	K01681;K01681;K01681;K01681;K01681;K01681;K01681	-	GO:0003824//catalytic activity;GO:0051536//iron-sulfur cluster binding	-
CIL0057S0008	83.9767	36.2133	-1.21347	3.75068e-07	1.3305e-06	ACO3	PREDICTED: aconitate hydratase, cytoplasmic isoform X1 [Juglans regia]	Metabolism;Metabolism;Metabolism;Metabolism;Metabolism;Metabolism;Metabolism	Global and overview maps;Global and overview maps;Global and overview maps;Global and overview maps;Carbohydrate metabolism;Carbohydrate metabolism;Global and overview maps	ko01100//Metabolic pathways;ko01110//Biosynthesis of secondary metabolites;ko01200//Carbon metabolism;ko01230//Biosynthesis of amino acids;ko00630//Glyoxylate and dicarboxylate metabolism;ko00020//Citrate cycle (TCA cycle);ko01210//2-Oxocarboxylic acid metabolism	K01681;K01681;K01681;K01681;K01681;K01681;K01681	GO:0009532//plastid stroma;GO:0030312//external encapsulating structure;GO:0031090//organelle membrane	GO:0016836//hydro-lyase activity;GO:0032550//purine ribonucleoside binding;GO:0046914//transition metal ion binding;GO:0051536//iron-sulfur cluster binding	GO:0000160//phosphorelay signal transduction system;GO:0000302//response to reactive oxygen species;GO:0006006//glucose metabolic process;GO:0006090//pyruvate metabolic process;GO:0006101//citrate metabolic process;GO:0006486//protein glycosylation;GO:0006970//response to osmotic stress;GO:0006996//organelle organization;GO:0009725//response to hormone;GO:0010038//response to metal ion;GO:0019941…
CIL1374S0004	109.463	36.3933	-1.5887	0.000135468	0.000334805	ACO3	PREDICTED: aconitate hydratase, cytoplasmic isoform X1 [Juglans regia]	Metabolism;Metabolism;Metabolism;Metabolism;Metabolism;Metabolism;Metabolism	Global and overview maps;Global and overview maps;Global and overview maps;Global and overview maps;Carbohydrate metabolism;Carbohydrate metabolism;Global and overview maps	ko01100//Metabolic pathways;ko01110//Biosynthesis of secondary metabolites;ko01200//Carbon metabolism;ko01230//Biosynthesis of amino acids;ko00630//Glyoxylate and dicarboxylate metabolism;ko00020//Citrate cycle (TCA cycle);ko01210//2-Oxocarboxylic acid metabolism	K01681;K01681;K01681;K01681;K01681;K01681;K01681	GO:0009532//plastid stroma;GO:0030312//external encapsulating structure;GO:0031090//organelle membrane	GO:0016836//hydro-lyase activity;GO:0032550//purine ribonucleoside binding;GO:0046914//transition metal ion binding;GO:0051536//iron-sulfur cluster binding	GO:0000160//phosphorelay signal transduction system;GO:0000302//response to reactive oxygen species;GO:0006006//glucose metabolic process;GO:0006090//pyruvate metabolic process;GO:0006101//citrate metabolic process;GO:0006486//protein glycosylation;GO:0006970//response to osmotic stress;GO:0006996//organelle organization;GO:0009725//response to hormone;GO:0010038//response to metal ion;GO:0019941…
CIL0313S0003	12.25	3.43333	-1.8351	0.00100689	0.00215724	ACR10	PREDICTED: ACT domain-containing protein ACR10 [Juglans regia]	-	-	-	-	-	GO:0031406//carboxylic acid binding	GO:0000302//response to reactive oxygen species;GO:0009642//response to light intensity
CIL1387S0046	4.8	1.33667	-1.84439	0.00177207	0.00363527	ACR11	PREDICTED: ACT domain-containing protein ACR11 isoform X1 [Juglans regia]	-	-	-	-	-	GO:0031406//carboxylic acid binding	-
CIL0177S0012	1.99	60.3433	4.92235	6.10459e-31	1.4751e-29	ACR12	PREDICTED: ACT domain-containing protein ACR12-like isoform X1 [Juglans regia]	-	-	-	-	GO:0009532//plastid stroma;GO:0044434//chloroplast part	GO:0031406//carboxylic acid binding	GO:0016094//polyprenol biosynthetic process
CIL1424S0015	25.7033	0.443333	-5.85742	1.82083e-29	4.06489e-28	--	PREDICTED: actin cytoskeleton-regulatory complex protein PAN1-like [Juglans regia]	-	-	-	-	GO:0043231//intracellular membrane-bounded organelle	-	-
CIL1525S0050	9.72	1.54333	-2.65491	3.61774e-08	1.45903e-07	AC97	PREDICTED: actin-97 [Juglans regia]	-	-	-	-	-	GO:0032550//purine ribonucleoside binding	-
CIL0127S0004	4.8	0.126667	-5.24393	9.77845e-05	0.000246872	ADF2	PREDICTED: actin-depolymerizing factor 2-like [Juglans regia]	-	-	-	-	-	-	-
CIL1493S0031	13.22	6.01333	-1.13649	0.0152759	0.0261562	ARP9	PREDICTED: actin-related protein 9 [Juglans regia]	-	-	-	-	GO:0033202//DNA helicase complex	-	GO:0003006//developmental process involved in reproduction
CIL0013S0022	40.3667	14.9067	-1.43721	0.000674175	0.00148781	MTACP2	PREDICTED: acyl carrier protein 2, mitochondrial-like [Juglans regia]	Metabolism;Metabolism	Global and overview maps;Energy metabolism	ko01100//Metabolic pathways;ko00190//Oxidative phosphorylation	K03955;K03955	GO:0044425//membrane part;GO:0044429//mitochondrial part	GO:0046914//transition metal ion binding	GO:0006631//fatty acid metabolic process;GO:0006950//response to stress;GO:0007275//multicellular organism development
MSTRG.29222	1.22667	0.173333	-2.82312	3.9726e-10	2.01061e-09	--	PREDICTED: acyl carrier protein 3, mitochondrial-like isoform X1 [Juglans regia]	Metabolism;Metabolism	Global and overview maps;Energy metabolism	ko01100//Metabolic pathways;ko00190//Oxidative phosphorylation	K03955;K03955	-	-	-
CIL1599S0012	6.55667	15.21	1.21399	2.78176e-07	1.00306e-06	ALT3	PREDICTED: acyl-acyl carrier protein thioesterase ATL3, chloroplastic-like [Juglans regia]	-	-	-	-	-	-	-
CIL0143S0022	2.5	68.6933	4.78017	4.00778e-58	3.66769e-56	ACBP2	PREDICTED: acyl-CoA-binding domain-containing protein 3-like [Juglans regia]	-	-	-	-	-	-	-
CIL0207S0002	8.29667	92.6133	3.48062	1.95845e-57	1.72498e-55	ACBP3	PREDICTED: acyl-CoA-binding domain-containing protein 3-like [Juglans regia]	-	-	-	-	-	-	-
CIL1336S0023	5.57333	0.0233333	-7.9	5.37109e-12	3.2862e-11	--	PREDICTED: acyl-CoA-binding domain-containing protein 5-like isoform X1 [Ziziphus jujuba]	-	-	-	-	-	-	-
[truncated: 4,360 more rows]

## Sheet: Table S5
Table S5 Gene Ontology (GO) functional annotation of DEGs
GO Term (level1)	GO ID (level2)	GO Term (level2)	Up	Down	Total
Biological Process	GO:0044699	single-organism process	361	913	1274
Biological Process	GO:0048519	negative regulation of biological process	7	56	63
Biological Process	GO:0032501	multicellular organismal process	29	173	202
Biological Process	GO:0009987	cellular process	384	1127	1511
[truncated: 44 more rows]

## Sheet: Table S6
Table S6 GO function of DEGs
[truncated: 279 more rows]

## Sheet: Table S7
Table S7: KEGG pathway mapping
[truncated: 130 more rows]

[truncated: 2 more sheets: Table S8, Table S9]
